# Supplementary material for: Optimization of the 2-arylquinazoline-4(3H)one scaffold for a selective and potent antitrypanosomal agent: modulation of the mechanism of action through chemical functionalization
Source: Royal Society of Chemistry journal article supplement (doi:10.1039/d3md00243h), 2023-01-01

## SUPPORTING INFORMATION FOR

### Optimization on the 2-Arylquinazoline-4(3H)one Scaffold for an Selective and Potent Antitrypanosomal Agent: Mechanism of Action Modulated through Chemical Functionalization

Angel H. Romero,<sup>a\*</sup> Elena Aguilera,<sup>a</sup> Lourdes Gotopo,<sup>b</sup> Gustavo Cabrera,<sup>b</sup> Belén Dávila,<sup>a</sup> Hugo Cerecetto<sup>a,c\*</sup>

<sup>a</sup>*Grupo de Química Orgánica Medicinal, Instituto de Química Biológica, Facultad de Ciencias, Universidad de la Republica, Igual 4225, 11400 Montevideo, Uruguay.*

<sup>b</sup>*Laboratorio de Síntesis de Orgánica, Facultad de Ciencias, Universidad Central de Venezuela, Los Chaguaramos, Caracas 1041-A, Venezuela.*

<sup>c</sup>*Área de Radiofarmacia, Centro de Investigaciones Nucleares, Facultad de Ciencias, Universidad de la Republica, Mataojo 42055, 11400 Montevideo, Uruguay.*

**\*Corresponding Authors E-mail:** angel.ucv.usb@gmail.com; aromero@fcien.edu.uy (A.H. Romero); hcerecetto@cin.edu.uy (H. Cerecetto)

#### Table of Contents

|                                                               |             |
|---------------------------------------------------------------|-------------|
| <b>1. General Chemistry Information.....</b>                  | <b>S2</b>   |
| <b>2. Synthetic Procedures and Characterization Data.....</b> | <b>S2</b>   |
| <b>3. Biological Experimental Information.....</b>            | <b>S7</b>   |
| <b>4. Biological Procedures.....</b>                          | <b>S7</b>   |
| <b>5. Mechanistic Assays.....</b>                             | <b>S10</b>  |
| <b>6. Theoretical Calculations.....</b>                       | <b>S12</b>  |
| <b>7. Experimental Evidences.....</b>                         | <b>S14</b>  |
| <b>8. References.....</b>                                     | <b>S19</b>  |
| <b>9. Theoretical Output of the tested compounds.....</b>     | <b>S21</b>  |
| <b>10. NMR spectra.....</b>                                   | <b>S111</b> |

## 1. General Chemistry Information

The 2-arylquinazolin-4-hydrazines **2a-g** used herein were previously prepared.<sup>1</sup> The rest of reagents were purchased from commercial sources and used without further purification. Solvents were anhydrous HPLC grade. <sup>1</sup>H NMR and <sup>13</sup>C NMR spectra were recorded on a 400 MHz NMR-spectrometer (Bruker-400). Multiplicity is indicated as follows: s (singlet), d (doublet), t (triplet), m (multiplet), dd (doublet of doublets), brs (broad singlet); chemical shifts were measured in parts per million ( $\delta$ ) and coupling constant ( $J$ ) are given in Hz. Proton chemical shifts were given in relative to tetramethylsilane ( $\delta$  0.00 ppm) in DMSO-*d*<sub>6</sub> solvents. Carbon chemical shifts are internally referenced to the deuterated solvent signals in CDCl<sub>3</sub> ( $\delta$  77.00 ppm) or DMSO-*d*<sub>6</sub> ( $\delta$  40.02 ppm). Elemental analyses of the synthesized compounds were performed using a Perkin Elmer 2400 CHN analyser: results fell in the range of 0.4% of the required theoretical values. TLC was performed using commercially available 100-400 mesh silica gel plates (GF254), visualized under UV light (at 254 nm). Absorption spectra data were obtained from a Thermo Scientific Varioskans Flash Multimode instrument for air-equilibrated solutions at 25 °C.

## 2. Synthetic Procedures and Characterization Data

**2.1. General procedure for the synthesis of (*E/Z*)-4-(2-((5-nitrofuran-2-yl)methylene)hydrazineyl)-2-phenylquinazoline **3a-h**.** The corresponding starting material **2a-g** (0.5 mmol, 1.0 eq.) was initially dissolved in aqueous acidic solution (1 mL, 1M in HCl) and the corresponding furfuraldehyde (furfural or 5-nitro-2-furfurylcarbaldehyde) (0.6 mmol, 1.2 eq.) was added following reported protocol with a few modifications.<sup>2,3</sup> The reaction mixture was stirred for 10-20 minutes at 60 °C. The mixture was cooled at room-temperature and neutralized with addition of sodium carbonate solution until to reach pH of 7. The formed precipitate was filtered by vacuum and, the resulting solid was washed several times with aqueous solution to obtain an orange or red solid **3a-h**, which was recrystallized in methanol/DMF mixture. The product were characterized by NMR spectroscopy and they were reported as a *E/Z* mixture from <sup>1</sup>H-NMR spectroscopic analysis. A general nomenclature, for example, **3a\_E** was assigned for the *E*-isomer of compound **3a**, whereas **3a\_Z** was assigned for the *Z*-isomer of the compound **3a**.

## 2.2. Characterization data for the synthesized compounds 3a-h

### 2.2.1. (*E/Z*)-4-(2-((5-nitrofur-2-yl)methylene)hydrazinyl)-2-(phenyl)quinazoline 3a

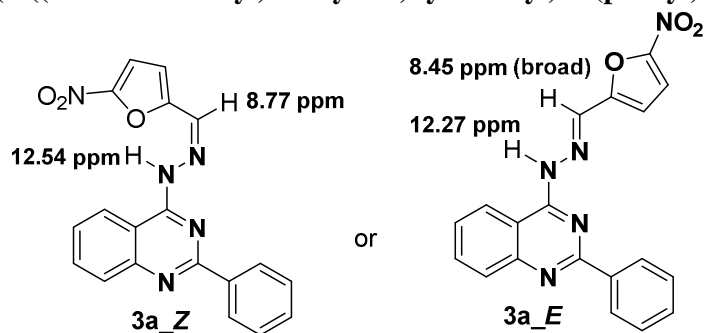

<sup>1</sup>H-NMR (400 MHz, DMSO-*d*<sub>6</sub>): Mixture *E/Z* isomers. *E* (69%): δ 12.27 (br, 1H), 8.77 (m, 1H), 8.55 (d, *J*= 5.6 Hz, 2H), 8.45 (s broad, 1H), 7.92 (m, 2H), 7.85 (d, *J*=3.6 Hz, 1H), 7.55 (m, 4H), 7.34 (d, *J*=3.6 Hz, 1H); *Z* (31%): δ 12.54 (br, 1H), 8.77 (s, 1H), 8.20 (d, *J*=6.4 Hz, 1H), 8.17 (d, *J*=8.8 Hz, 2H), 7.82 (d, *J*=3.6 Hz, 1H), 7.75 (d, *J*= 8.0 Hz, 1H), 7.61 (m, 1H), 7.55 (m, 4H), 7.46 (d, *J*=3.6 Hz, 1H). <sup>13</sup>C-NMR (400 MHz, DMSO-*d*<sub>6</sub>): ~ 34 different signals (see spectrum at end of S.I.). **Anal. Calc. for C<sub>19</sub>H<sub>13</sub>N<sub>5</sub>O<sub>3</sub>:** C, 63.51; H, 3.65; N, 19.49. Found: C, 63.46; H, 3.58; N, 19.40.

### 2.2.2. (*E/Z*)-4-(2-((5-nitrofur-2-yl)methylene)hydrazinyl)-2-(4-fluorophenyl)quinazoline 3b

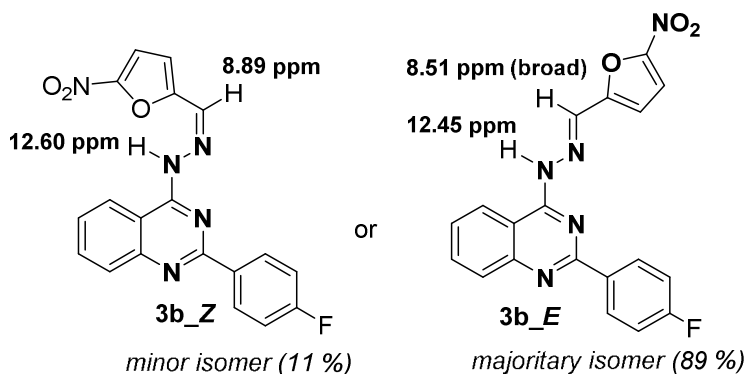

<sup>1</sup>H-NMR (400 MHz, DMSO-*d*<sub>6</sub>): *E* (89 %) δ 12.45 (br, 1H), 8.81 (s broad, 1H), 8.58 (m, 2H), 8.56 (s, 1H), 7.91 (m, 2H), 7.85 (d, *J*=3.6 Hz, 1H), 7.63 (m, 1H), 7.44 (d, *J*=8.4 Hz, 2H), 7.35 (d, *J*=3.6 Hz, 1H); *Z* (~11 %). <sup>13</sup>C-NMR (400 MHz, DMSO-*d*<sub>6</sub>): δ 165.48 (d, *J*<sub>C-F</sub>=984.4 Hz), 158.73, 157.46, 152.91, 152.33, 134.80, 134.18, 133.78, 130.85 (d, *J*<sub>C-C-F</sub>=34.8 Hz), 128.45, 126.74, 124.99, 115.70 (d, *J*<sub>C-C-F</sub>=86.4 Hz), 115.50, 114.73, 113.14. **HSQC** (400 MHz, DMSO-*d*<sub>6</sub>): δ 152.91, 152.27, 134.01, 130.85, 128.40,

126.93, 115.88, 115.66, 115.29. <sup>19</sup>F-NMR (400 MHz, DMSO-d<sub>6</sub>): -111.11. **Anal. Calc. for C<sub>19</sub>H<sub>12</sub>FN<sub>5</sub>O<sub>3</sub>**: C, 60.48; H, 3.21; F, 5.03; N, 18.56. Found: C, 60.42; H, 3.17; N, 18.40.

**2.2.3. (E/Z)-4-(2-((5-nitrofuran-2yl)methylene)hydrazinyl)-2-(4-chlorophenyl)quinazoline 3c**

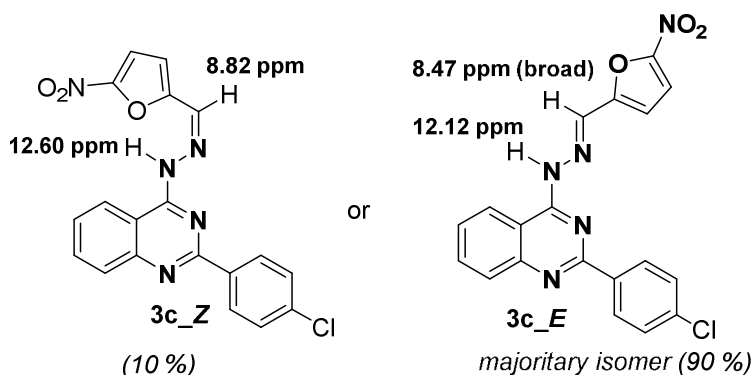

<sup>1</sup>H-NMR (400 MHz, DMSO-d<sub>6</sub>): *E* (90 %) δ 12.12 (br, 1H), 8.81 (d, *J* = 7.4 Hz, 1H), 8.52 (d, *J* = 8.0 Hz, 2H), 8.47 (s broad, 1H), 7.90 (m, 2H), 7.75 (d, *J* = 3.6 Hz, 1H), 7.60 (m, 3H), 7.27 (sa, 1H); *Z* (10 %). <sup>13</sup>C-NMR (400 MHz, DMSO-d<sub>6</sub>): δ 161.70, 157.07, 156.74, 150.83, 150.47, 135.30, 133.94, 132.38, 131.84, 130.29, 128.32, 127.13, 126.70, 125.10, 113.63, 113.03, 111.12. **Anal. Calc. for C<sub>19</sub>H<sub>12</sub>ClN<sub>5</sub>O<sub>3</sub>**: C, 57.95; H, 3.07; N, 17.78. Found: C, 57.83; H, 3.04; N, 17.63.

**2.2.4. (E/Z)-4-(2-((5-nitrofuran-2yl)methylene)hydrazinyl)-2-(4-bromophenyl)quinazoline 3d**

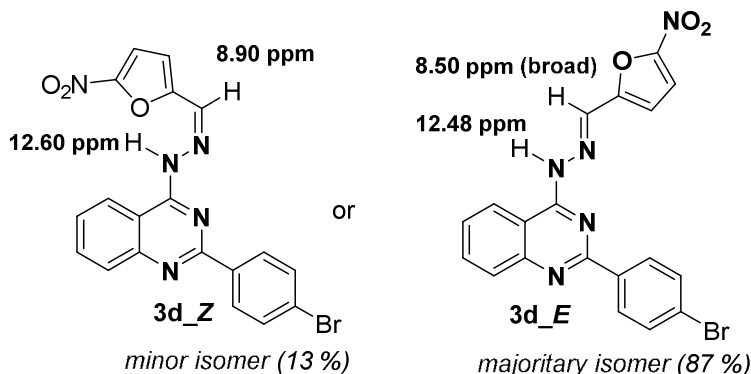

<sup>1</sup>H-NMR (400 MHz, DMSO-d<sub>6</sub>): *E* (87 %) δ 12.38 (br, 1H), 8.78 (s, 1H), 8.48 (s broad, 1H), 8.48-8.45 (m, 2H), 7.92 (m, 2H), 7.85 (s, 1H), 7.77-7.75 (m, 2H), 7.60 (m, 1H), 7.35 (s, 1H); *Z* (13 %). <sup>13</sup>C-NMR (400 MHz, DMSO-d<sub>6</sub>): δ 162.82, 159.86, 157.44,

152.75, 152.30, 134.31, 132.58, 131.97, 130.47, 130.29, 128.48, 127.05, 124.88, 121.45, 115.52, 114.94, 113.27. **HSQC** (400 MHz, DMSO-*d*<sub>6</sub>): 134.11, 133.57, 130.45, 130.40, 128.53, 126.75, 115.24, 114.76. **Anal. Calc. for C<sub>19</sub>H<sub>12</sub>BrN<sub>5</sub>O<sub>3</sub>**: C, 52.07; H, 2.76; N, 15.98. Found: C, 52.02; H, 2.78; N, 15.91.

**2.2.5. (E/Z)-4-(2-((5-nitrofur-2-yl)methylene)hydrazinyl)-2-(4-methylphenyl)quinazoline 3e**

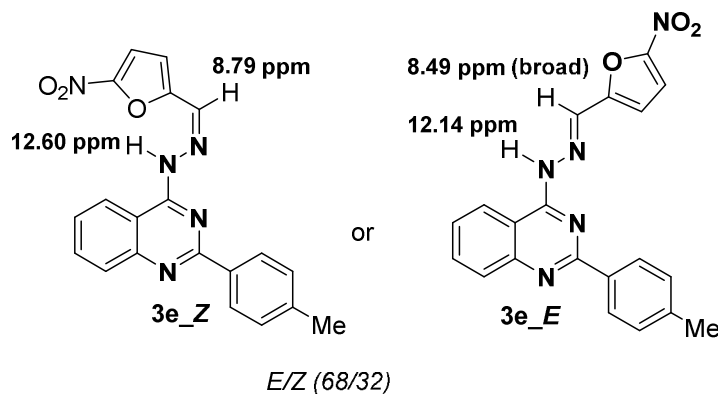

**<sup>1</sup>H-NMR** (400 MHz, DMSO-*d*<sub>6</sub>) and **<sup>13</sup>C-NMR** (400 MHz, DMSO-*d*<sub>6</sub>) can be found at end of S.I. **Anal. Calc. for C<sub>20</sub>H<sub>15</sub>N<sub>5</sub>O<sub>3</sub>**: C, 64.34; H, 4.05; N, 18.76. Found: C, 64.12; H, 3.98; N, 18.71.

**2.2.6. (E/Z)-4-(2-((5-nitrofur-2-yl)methylene)hydrazinyl)-2-(3-chlorophenyl)quinazoline 3f**

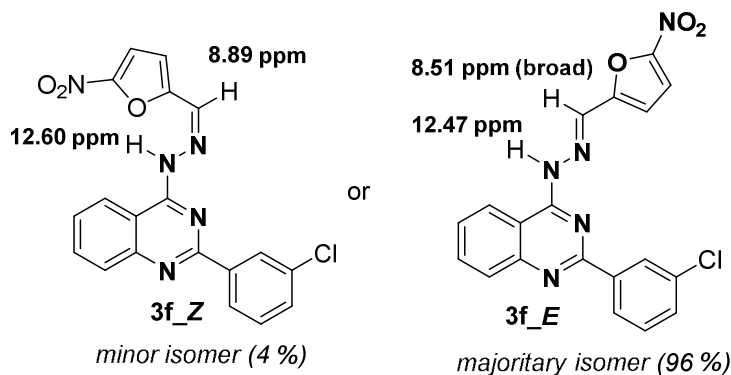

**<sup>1</sup>H-NMR** (400 MHz, DMSO-*d*<sub>6</sub>): *E* (96%) δ 12.47 (br, 1H), 8.82 (d, *J* = 7.4 Hz, 1H), 8.51 (s, 1H), 8.51-8.47 (m, 2H), 7.93 (m, 2H), 7.85 (d, *J* = 4.0 Hz, 1H), 7.64-7.59 (m, 4H), 7.32 (d, *J* = 3.6 Hz, 1H); *Z* (4%). **<sup>13</sup>C-NMR** (400 MHz, DMSO-*d*<sub>6</sub>): δ 158.07, 157.48, 152.66, 152.24, 151.36, 140.21, 134.28, 133.84, 130.88, 130.75, 128.40,

128.13, 127.13, 126.94, 125.15, 115.43, 115.02, 113.36. **Anal. Calc. for C<sub>19</sub>H<sub>12</sub>ClN<sub>5</sub>O<sub>3</sub>**: C, 57.95; H, 3.07; N, 17.78. Found: C, 57.89; H, 3.05; N, 17.70.

**2.2.7. (E)-4-(2-((5-nitrofur-2-yl)methylene)hydrazinyl)-2-(3-bromophenyl)quinazoline 3g**

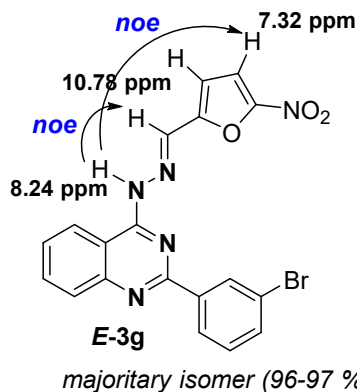

**<sup>1</sup>H-NMR** (400 MHz, DMSO-*d*<sub>6</sub>): **E** (≥ 97%) δ 10.78 (br, 1H), 8.65 (m, 2H), 8.24 (s, 1H), 8.19 (m, 2H), 7.94 (m, 3H), 7.72 (m, 1H), 7.29 (m, 1H), 7.32 (m, 1H). **<sup>13</sup>C-NMR** (400 MHz, DMSO-*d*<sub>6</sub>): δ 161.57, 161.44, 157.84, 155.58, 150.52, 141.72, 140.67, 134.13, 133.30, 130.95, 128.68, 128.63, 127.10, 126.84, 123.21, 122.16, 113.84, 113.43, 112.26. **HSQC** (400 MHz, DMSO-*d*<sub>6</sub>): 133.92, 133.38, 130.80, 130.75 (2C), 128.24, 126.89, 126.77, 123.19. **Anal. Calc. for C<sub>19</sub>H<sub>12</sub>BrN<sub>5</sub>O<sub>3</sub>**: C, 52.07; H, 2.76; N, 15.98. Found: C, 52.02; H, 2.78; N, 15.91.

**2.2.8. (E)-4-(2-(furan-2-yl-methylene)hydrazinyl)-2-(4-fluorophenyl)quinazoline 3h**

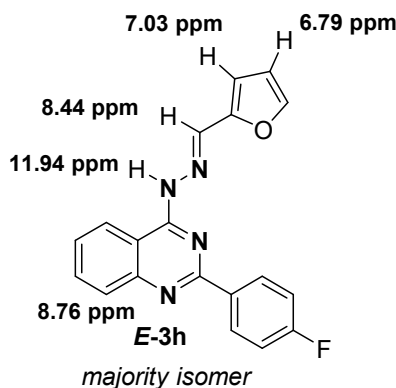

**<sup>1</sup>H-NMR** (400 MHz, DMSO-*d*<sub>6</sub>): **E** (98 %) δ 11.91 (br, 1H), 8.76 (m, 1H), 8.56 (m, 1H), 8.44 (s, 1H), 7.94 (d, *J* = 0.8 Hz, 1H), 7.87 (m, 2H), 7.60 (m, 1H), 7.38 (dd, *J*<sub>H-F</sub> = 8.6 Hz, *J*<sub>H-H</sub> = 8.4 Hz, 2H), 7.03 (d, *J* = 2.4 Hz, 1H), 6.79 (dd, *J* = 2.0, 1.6 Hz, 1H); **Z** (2 %) δ 12.57 (br, 1H). **<sup>13</sup>C-NMR** (400 MHz, DMSO-*d*<sub>6</sub>): δ 165.52 (d, *J*<sub>C-F</sub> = 984.4 Hz),

163.78, 158.64, 157.42, 150.03, 145.74, 144.19, 136.55, 134.66, 133.94, 130.76 (d,  $J_{C-C-F}$  = 33.2 Hz), 127.92, 126.43, 115.90 (d,  $J_{C-C-F}$  = 85.6 Hz), 114.10, 113.09, 112.81. **<sup>19</sup>F-NMR** (400 MHz, DMSO-*d*<sub>6</sub>): -110.81. **HSQC** (400 MHz, DMSO-*d*<sub>6</sub>):  $\delta$  133.92, 133.38, 130.80, 130.75 (2C), 128.24, 126.89, 126.77, 123.19. **Anal. Calc. for C<sub>19</sub>H<sub>13</sub>FN<sub>4</sub>O**: C, 68.67; H, 3.94; N, 16.86. Found: C, 68.62; H, 3.86; N, 16.78.

### 3. Biological Experimental Information

*Parasite and cultures.* Tests were carried out on promastigotes of *Leishmania (V) infantum* (MHOM MA67I7MAP263) and epimastigote of *T. cruzi* CL Brener clone. Promastigote of *L. infantum* were provided by Dr. M. Comini (Lab. Redox Biology of Trypanosomes, Institut Pasteur, Mataojo 2020, Montevideo, Uruguay). Both parasites were maintained in brain-heart infusion medium (BHI, Oxoid) supplemented with 10 % heat inactivated fetal bovine serum (FBS, Capricorn), penicillin (100 units per mL) and streptomycin (100 mg per mL) at 28 °C and harvested during the exponential phase of growth. For differentiation and maintenance of promastigote culture was used medium LIT (tryptose 15 g/L, yeast extract 5 g/L, liver extract 2 g/L, hemin-NaOH 0.02 g/L, glucose 4 g/L, NaCl 9 g/L, KCl 0.4 g/L, Na<sub>2</sub>HPO<sub>4</sub> 7.5 g/L, pH 7.4) supplemented with 10 % fetal bovine serum and maintained at 29 °C. Macrophages J774.1A and peritoneal were grown in DMEN medium. Macrophages were grown in a humidified incubator with 5 % CO<sub>2</sub> and 95 % air at 37 °C until they reach the exponential growth phase. For treatments, exponentially growing cells were collected, counted, re-suspended in fresh culture medium and incubated in 96-sterile-well plates.

### 4. Biological Procedures

**4.1. In vitro anti-*T.cruzi* evaluation on epimastigote form.** The effect of the compounds **1a-g**, **2a-g** and (*E/Z*)-4-(2-((5-nitrofuranyl)methylene)hydrazineyl)-2-phenylquinazolines **3a-h** on the epimastigotes viability of *T. cruzi* (CL Brener clone) was determined through turbidimetric technique.<sup>4</sup> Stock solutions (at 3000  $\mu$ M) of the tested compounds in DMSO were prepared. Fresh solutions were diluted in the culture medium to obtain the different concentrations from 0.5 to 25  $\mu$ M. All controls and tested well contains no more than 1 % of DMSO. The screening was performed in 24-well microliter plates maintained at 25 °C. Briefly,  $2 \times 10^6$  parasites/mL were exposed to increasing concentrations from 0.5 to 25.0  $\mu$ M

(0.5, 1.0, 2.5, 5.0, 10.0, 25  $\mu\text{M}$ ) of each compound for 120 h at 25 °C. Controls contain 1 % of DMSO and medium. Biological effect of these compounds was evaluated through absorbance measurements at 595 nm using a spectrometer El301 microwell at 5 days. Untreated control parasites were used to calculate the relative proliferation. Nifurtimox was used as reference drug. The  $\text{IC}_{50}$  value (50 % growth inhibitory concentration) was determined as follows: % parasite growth =  $(A_p - A_{0p}) / (A_c - A_{0c}) - 100$ , where:

$A_p$  =  $A_{595}$  of the culture containing the compound at day 5;

$A_{0p}$  =  $A_{595}$  of the culture containing the compound at day 0;

$A_c$  =  $A_{595}$  of the culture in the absence of any drug (control) at day 5;

$A_{0c}$  =  $A_{595}$  in the absence of any drug at day 0.

**4.2. *In vitro* anti-*Leishmania* evaluation on promastigote.** The cell viability of the compounds **1a-g**, **2a-g** and **3a-h** on *Leishmania infantum* (MHOM MA67I7MAP263) strain was assessed using the 3-(4,5-dimethylthiazol-2-yl)-2,5-diphenyltetrazolium bromide (MTT) assays with a few modifications.<sup>2</sup> Stock solutions (at 3000  $\mu\text{M}$ ) of the tested compounds in DMSO were prepared. Fresh solutions were diluted in the culture medium to obtain the different concentrations from 0.5 to 25  $\mu\text{M}$ . All controls and tested well contains no more than 1 % of DMSO. The screening was performed in 96-well microliter plates maintained at 25 °C. Briefly,  $2 \times 10^6$  parasites/mL were exposed to increasing concentrations from 0.5 to 25.0  $\mu\text{M}$  (0.5, 1.0, 2.5, 5.0, 10.0 and 25.0  $\mu\text{M}$ ) of each compound for 72 h at 25 °C. Controls contain 1 % of DMSO and medium. After incubation, cells were treated with 100  $\mu\text{L}$  0.4 mg/mL MTT for 4h at 37 °C. Subsequently, the medium was removed and 100  $\mu\text{L}$  DMSO was added to the resulting mixture to dissolved formazan salt. The solubilized formazan product was quantified through absorbance measurements at 570 nm using a Thermo Scientific Varioskan Flash Multimode instrument at 72 h. Miltefosine and glucantime were used as reference drugs. Untreated control parasites were used to calculate the relative proliferation. The percentage of parasite inhibition with regard to controls was calculated as=  $100 - [(\text{parasite counts in treated cells} / \text{parasite counts in untreated cells}) - 100]$ .

**4.3. *In vitro* anti-amastigote activity of *L. infantum*.** Axenic amastigote forms of *L. infantum* were cultured as described in literature.<sup>5</sup> The promastigotes were transformed into amastigotes by culturing for three days in BHI medium supplemented with 10%



heat-inactivated fetal calf serum, 1 g/L  $\beta$ -alanine, 100 mg/L L-asparagine, 200 mg/L sucrose, 50 mg/L sodium pyruvate, 320 mg/L malic acid, 40 mg/L fumaric acid, 70 mg/L succinic acid, 200 mg/L  $\alpha$ -ketoglutaric acid, 300 mg/L citric acid, 1.1 g/L sodium bicarbonate, 5 g/L 2-[morpholino]ethanesulfonic acid, 0.4 mg/L hemin and 10 mg/L gentamicin at a *pH* of 5.4 at 37 °C. The screening was performed in 96-well microtiter plates maintained at 37 °C. Briefly,  $2 \times 10^6$  parasites/mL were exposed to increasing concentrations (0.5, 1.0, 2.5, 5.0, 10.0 and 25.0  $\mu$ M) of each compound **3a-h**. Controls contained 1% of DMSO. Miltefosine and glucantime were used as reference drug. The effect of the derivatives **3a-h** against amastigote forms was tested at 48 h using conventional counting parasite in Neubauer chamber (optical microscopy, 1000x magnification) using tripan blue. Untreated control parasites were used to calculate the relative proliferation. The antileishmanial effects were expressed as IC<sub>50</sub>.

**4.4. Cytotoxicity.** Peritoneal and J774.1A macrophages were grown in DMEM medium supplemented with 10 % heat inactivated fetal bovine serum, 1 % of L-glutamine, 1 % streptomycin, 100 units/mL penicillin. Cell viability was assessed using MTT protocol.<sup>2,4</sup> Stock solutions (at 25000  $\mu$ M) of the tested compounds in DMSO were prepared. Cells were grown in 96-well plates ( $5 \times 10^4$  cells/well) for 24 h. Cultures were carried out at 37 °C in a humidified atmosphere with 5 % CO<sub>2</sub> and incubated with the (*E/Z*)-4-(2-((5-nitrofuran/furan-2-yl)methylene)hydrazineyl)-2-phenylquinazolines **3a**, **3b**, **3f** and **3h** at 0, 10.0, 25.0, 50.0, 75, 100  $\mu$ M concentrations for 48 h. After incubation, the medium was removed and, the cells were treated with 100  $\mu$ L 0.4 mg/mL MTT for 4 h at 37 °C. Subsequently, 100  $\mu$ L DMSO was added to the mixture. The solubilized formazan product was quantified through absorbance measurements at 570 nm. The absorbance values were transformed to the percentage of cytotoxicity compared to the negative controls.

**4.5. Mutagenicity Ames test.**<sup>6</sup> *In vitro* genetic toxicity *Salmonella typhimurium* TA 98 strain was incubated in agar minimum glucose milieu solution (Difco BactoR agar) and aqueous glucose solution (40 %). The direct toxicity of the derivatives **3b** and **3f** against *S. typhimurium* TA 98 strain was studied. From these data, the mutagenic assay was performed incubating **3b** or **3f** in phosphate buffer (0.1 M, pH 7.4) and DMSO (10 % v/v) at six doses. Control positive consisted of NPD (20.0 mg/plate) and negative controls consisted of phosphate buffer and DMSO (10 % v/v) solutions. The revertant

numbers were counted and the studied system was considered mutagenic if the colonies number was at least doubled the natural revertants (negative control) for two or more consecutive doses.

**4.6. Statistical analysis.** All biological experiments were performed at least three times. The results are expressed as mean  $\pm$  SD. Anova test were performed. Only post hoc Dunnet test  $p < 0.01$  was considered to be statistically significant. The dose-response curves were plotted using GraphPad prism v.5.02 software.<sup>7</sup>

**4.7. Drulikeness properties predictions.** Firstly, we proceeded to explore the analysis the existence of false positive agents, PAINS, through the filter named False Positive Remover.<sup>8</sup> ADME properties were analysed from the Swiss-ADME platform.<sup>9</sup> Drug-likeness maps can be found in Figure S7.

## 5. Mechanistic Assays

**5.1. Effect of Divalent Metal.** Similar to point 4.1,  $2 \times 10^6$  parasites/mL (epimastigote of *T. cruzi* or promastigote of *L. infantum*) were exposed to three concentrations from 6.25 to 25.0  $\mu\text{M}$  (6.25, 12.5 and 25.0  $\mu\text{M}$ ) of each compound for 120 h at 25 °C.<sup>1</sup> This experiment of parasite treated with the (*E/Z*)-4-(2-((5-nitrofuran/furan-2-yl)methylene)hydrazineyl)-2-phenylquinazolines **3a**, **3b** and **3f** was repeated in presence of copper (II), iron (III) and zinc (II) at a final concentration of 1  $\mu\text{M}$  in separated experiments. Three controls containing copper(II), iron (III) and zinc(II) salts were performed. All treated and untreated wells contain 1 % of DMSO. Antiepipimastigote effect of these compounds was evaluated through absorbance measurements at 595 nm using a spectrometer EL301 microwell at 5 days, whereas antipromastigote effect was determined using MTT protocol. Untreated control parasites were used to calculate the relative proliferation. Assays were performed by triplicate for all cases. The  $\text{IC}_{50}$  values (50 % growth inhibitory concentration) for the antiepipimastigote and antipromastigote activities were determined as described in points 4.1 and 4.2, respectively.

**5.2. Antifolate activity.** Similar to point 4.1,  $2 \times 10^6$  parasites/mL (epimastigote of *T. cruzi* or promastigote of *L. infantum*) were exposed to three concentrations from 6.25 to 25.0  $\mu\text{M}$  (6.25, 12.5 and 25.0  $\mu\text{M}$ ) of each compound for 120 h at 25 °C. This experiment of parasite treated with the (*E/Z*)-4-(2-((5-nitrofuran/furan-2-

yl)methylene)hydrazineyl)-2-phenylquinazolines **3a**, **3b**, **3f** and **3h** was repeated in presence of increasing concentration of *d,l*-folic acid (10 nM, 100 nM and 1000 nM) in separated experiments.<sup>10a</sup> Three controls containing folic acid at the three mentioned concentrations were performed. All treated and untreated wells contain 1 % of DMSO. Antiepipmastigote effect of these compounds was evaluated through absorbance measurements at 595 nm using a spectrometer EL301 microwell at 5 days, whereas antipromastigote effect was determined using MTT protocol. Untreated control parasites were used to calculate the relative proliferation. Assays were performed by triplicate for all cases. The IC<sub>50</sub> values (50 % growth inhibitory concentration) for the antiepipmastigote and antipromastigote activities were determined as described in points 4.1 and 4.2, respectively. Further assays were performed for key 2-arylquinazolin-4(3*H*)ones **1b** and **1c** and, 2-arylquinazolin-4-hydrazines **2c** and **2d**.

**5.3. Determination of nitrite concentration.** Nitrite (NO<sub>2</sub><sup>-</sup>) accumulation was determined in supernatants of promastigote or epimastigote culture, which were incubated (6×10<sup>6</sup>) for 5 days in the presence of the (*E/Z*)-4-(2-((5-nitrofuranyl)methylene)hydrazineyl)-2-(3-chlorophenyl)quinazolines **3f** at increasing concentrations (25, 50 and 100 μM). Three wells with untreated parasites were incubated as negative control. The assay was performed by the Griess reaction (detection limit: 1.56 μM) with sodium nitrite as a standard as previously described.<sup>2</sup> In brief, 100 μL of Griess reagent 1% sulphanilamide in 50% of acetic acid was added to 400 μL of each sample. Blank reference and standard curve were determined. After 15 min, 100 μL of a solution of *N*-[naphthyl]ethylenediamine dihydrochloride (1 %) in acetic acid in 50% was added. The absorbance was measured at 540 nm for that resulting final solution. Nitrite content was quantified by the extrapolation from sodium nitrite standard curve in each experiment. All the assays were performed by triplicate. The results were expressed amount of nitrite ion (in μM). Further assays were performed for key 2-arylquinazolin-4(3*H*)ones **1c** and 2-arylquinazolin-4-hydrazines **2c**.

**5.4. Measurement of reactive oxygen species (ROS).** To estimate the level of ROS, the cell-permeant probe H2DCFDA (2',7'-dichlorodihydrofluorescein diacetate) was used and analyzed by flow cytometry as described previously.<sup>11</sup> H2DCFDA is a non-fluorescent dye that is converted into fluorescent DCF (2',7'-dichlorofluorescein) in the presence of proper oxidants inside the cells. Promastigotes were treated with the 2×IC<sub>50</sub>

concentration of studied compounds, and the induction of ROS was estimated at 48 h at room temperature for 20 min in the dark. The induction of ROS in promastigotes was compared with the positive inducer H<sub>2</sub>O<sub>2</sub>.

## 6. Theoretical Calculations

**6.1. Optimization structures.** All theoretical calculations, in gas phase, were performed by using the B3LYP functional<sup>12a</sup> in conjunction with the 6-31G(d,p) basis set<sup>12b</sup> at Gaussian09 quantum chemistry software.<sup>13</sup> The B3LYP/6-31G(d,p) approach allowed us to obtain a consistent prediction for analogue structures such as the (*E*)-4-(2-((aryl-2-yl)methylene)hydrazineyl)-phthalazines<sup>14</sup> and 2-arylquinazolin-4-hydrazines<sup>1</sup>. Geometry of the free compounds **3a**, as *E*-form, and, their cation-compound complexes for copper(II), iron(III) and zinc (II) cations were optimized. HOMO-LUMO orbital frontier orbital maps were obtained for free compounds and metal-ligand complexes. HOMO and LUMO frontier orbital maps can be found in Figure S4-S5.

**6.2. Molecular Docking.** Docking calculations and analysis were carried out using the X-ray crystallographic PTR1-*Leishmania major* (PDB code: 1E7W) [15] and DHFT-TS of *T. cruzi* (PDB code: 3INV) [16]. Their structure was minimized using the CHARMM on Swiss-PdbViewer v4.0.1 software [17]. Binding site definition was determined by comparison with reported interactions for the respective co-crystallized ligand. The prepared protein was exported to ArgusLab v.4.0.1 program package [18] and save as Agl document. Then, molecular docking for the most stable extended geometry of the 5 tested derivates were performed using AMBER method on the selected protein implemented in the ArgusLab (v4.0.1) package program under Windows 10.0 environment. The docking experiment on the tested enzyme was carried out between the energy-minimized ligand into the binding site through their respective grid map dimensions and with a grid point spacing of 0.375 Å°. Rigid ligand models were used in the docking and subsequent optimization scheme. As a test of docking accuracy and for docking energy comparison, co-crystallized ligands were re-docked into the protein structures. Different orientations of the ligands were searched and ranked based on their energy scores. Reproducibility of the calculated affinity energy and the minimum energy pose were evaluated through 10 replicates for each ligand [19]. Affinity energy is reported as mean of the 10 replicates. The lowest energy (strongest-docking) poses for each ligand in binding site of the protein are summarized in Table 3.

## 7. Experimental Evidences

### 7.1. Analysis of *E/Z*-isomers in compounds **3a-h**

The compounds **3a-h** were found as a *E/Z* isomeric mixture in turn to the imine (-HC=N-) bond in solution. From nuclear Overhauser effect (NOESY) experiments for compounds **3f**, **3g** and **3h**, it should be noted that hydrazinyl proton (NH) (~ 11 ppm) showed spatial correlations with adjacent ylidenic proton (H-C=N-) (~ 8.57-8.44 ppm) for all these cases (Figures S1-S3). Extra correlations between the hydrazinyl proton with furyl protons can be noted in Figure S2 and S3, which suggested that the furylic oxygen is oriented in “*cisoid*” configuration concerning to the adjacent imine nitrogen (H-C=N-). Theoretical calculations on the compounds **3b** and **3f** revealed that they prefer a *cisoid* configuration between the furylic oxygen and the imine nitrogen (Figure S4), which implies a specific disposition of the furyl ring into the quinazolin-hydrazone structure as depicted in Figure S4. With a ylidenic proton at 8.57-8.44 ppm, all synthesized compounds **3a-h** showed a dominant *E*-isomer and the *Z*-isomer is identified by having higher chemical shifts for hydrazinyl (~12.60 ppm) and ylidenic (~8.90 ppm) protons (see details in section 2 and NMR spectra at end of S.I.). From <sup>1</sup>H-NMR spectra, a clear *E/Z*-isomeric ratio was estimated for all compounds **3a-h** (see details in section 2).

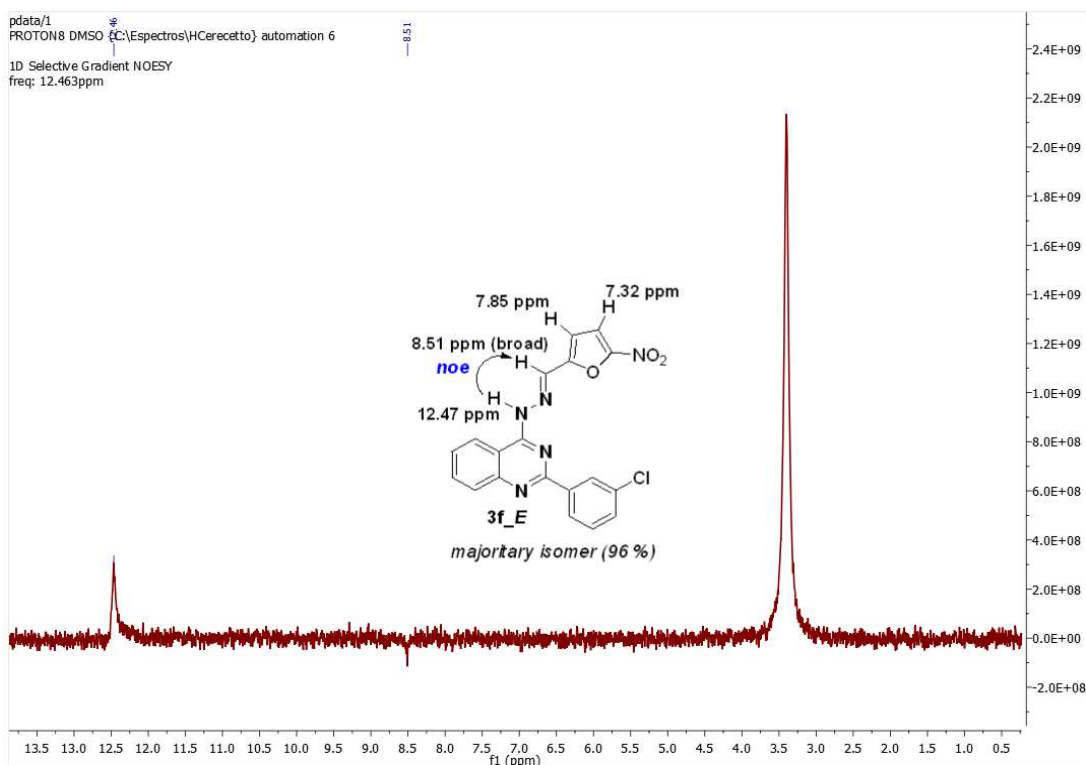

**Figure S1.** NOE experiments for compound **3f** with selective gradient at 12.463 ppm.

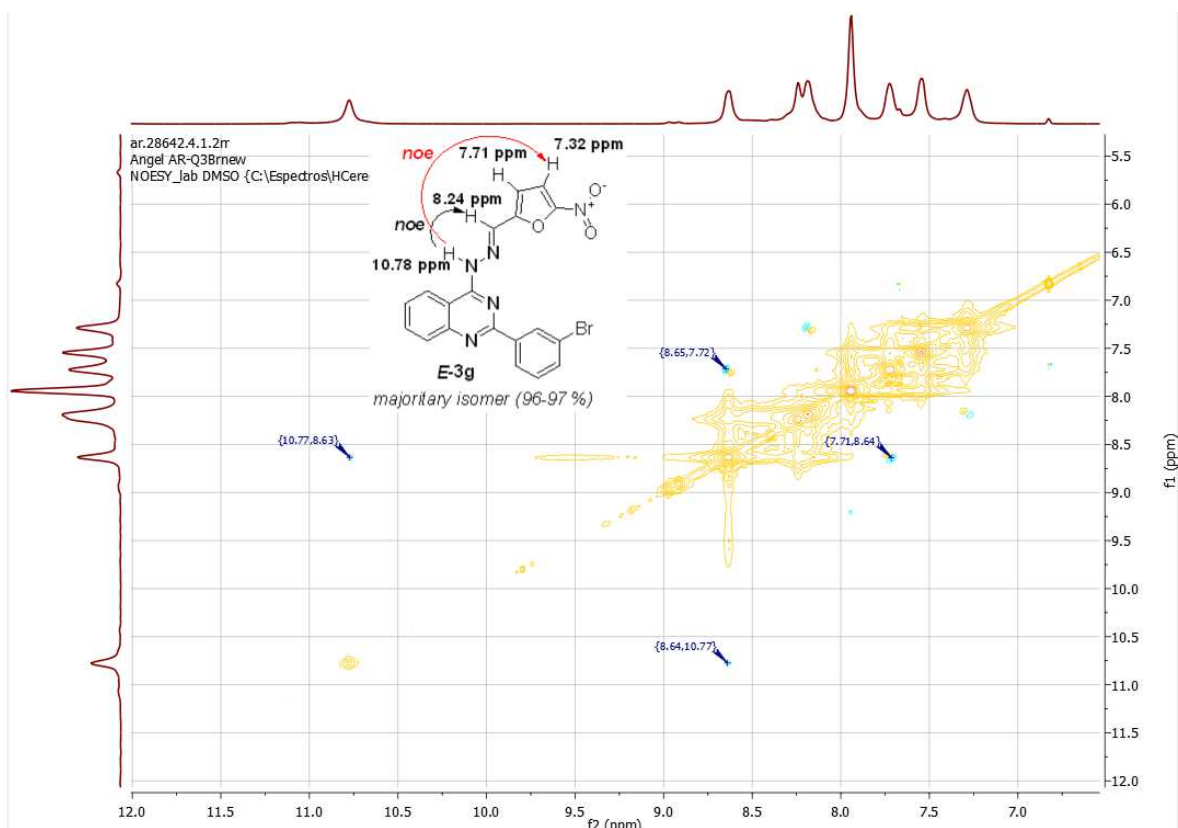

Figure S2. NOESY experiment for compound **3g**.

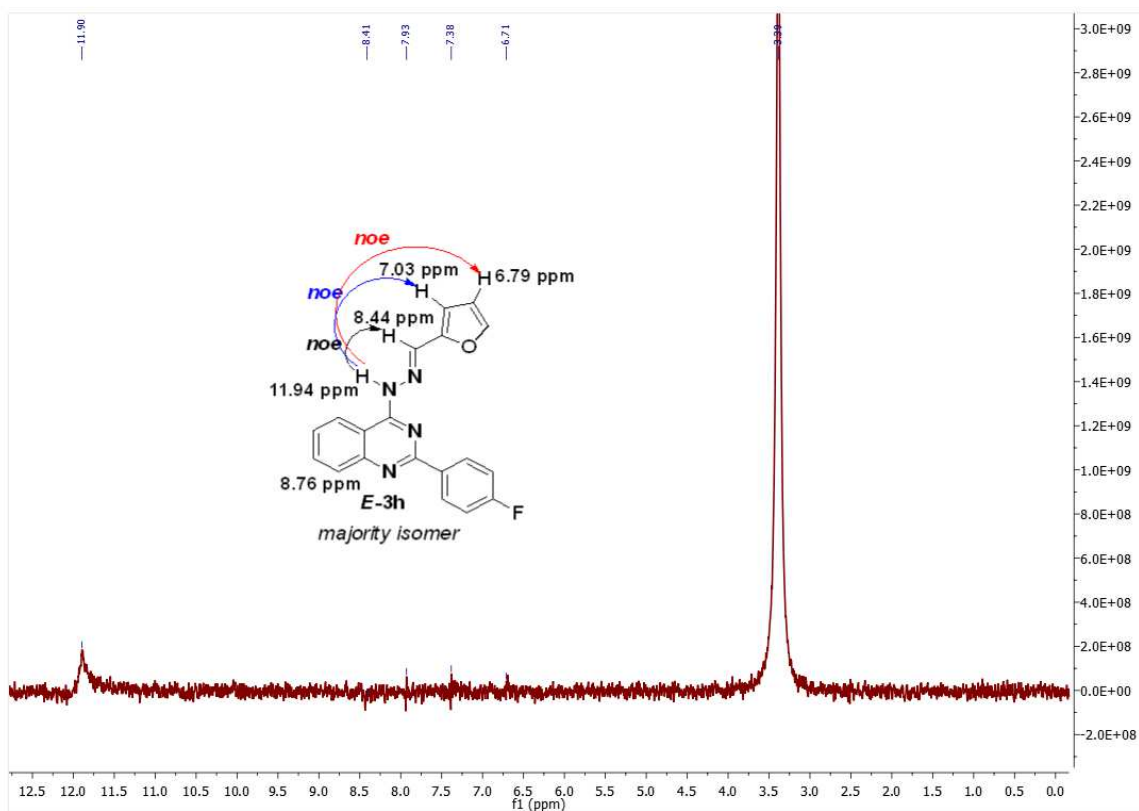

Figure S3. NOE spectra for compound **3h** with selective gradient at 11.90 ppm.

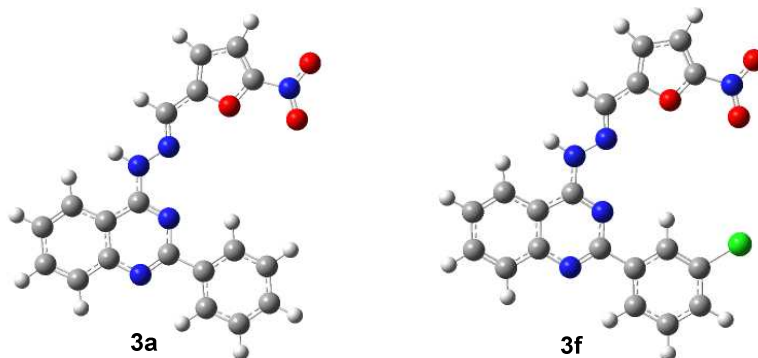

**Figure S4.** Theoretical structures of the compounds **3a** and **3f** from B3LYP/6-31G(d,p) calculations. Details in section 9 of S.I.

## 7.2. Molecular docking results

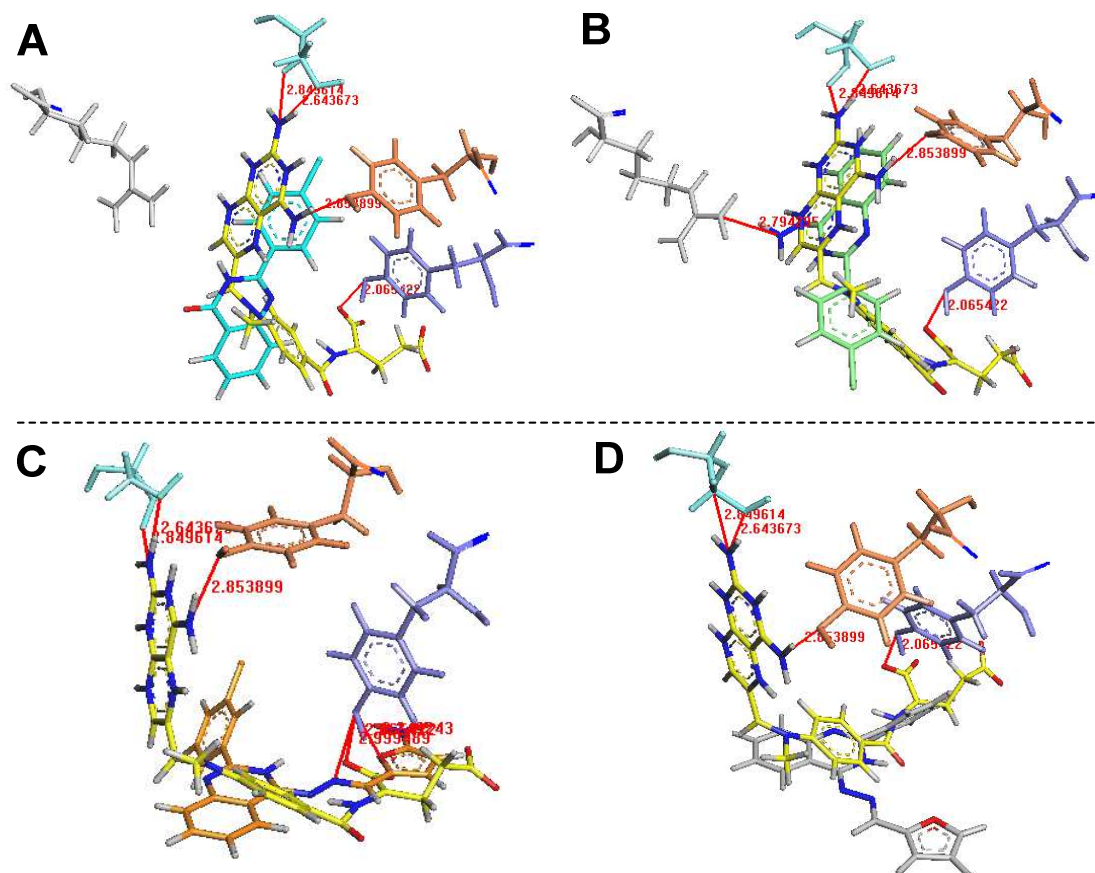

**Figure S5.** H-Interaction in the binding site of the PTR1-*Leishmania* protein for the compounds **1c** (cyan color, **A**), **2c** (green color, **B**), **3f** (orange color, **C**), **3h** (gray color, **D**) and methotrexate (yellow color). Residues color: Arg-300 (gray), Tyr-452 (purple), Tyr-455 (orange), Ser-385 (cyan).

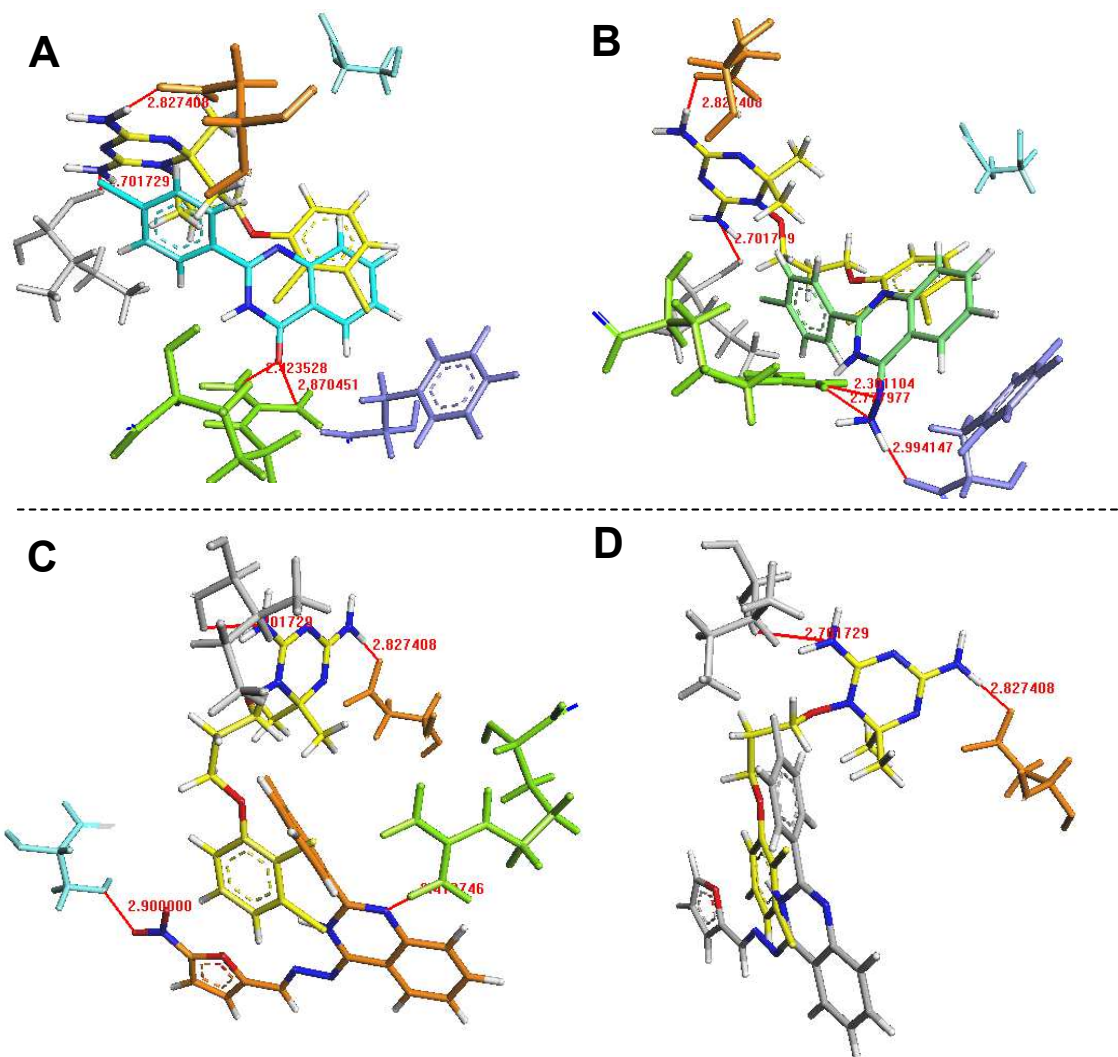

**Figure S6.** H-Interaction in the binding site of the DHFR-TS/T. *cruzi* protein for the compounds **1c** (cyan color, **A**), **2c** (green color, **B**), **3f** (orange color, **C**), **3h** (gray color, **D**) and C50 (yellow color). Residues color: Arg-300 (gray), Tyr-452 (purple), Tyr-455 (orange), Ser-385 (cyan).

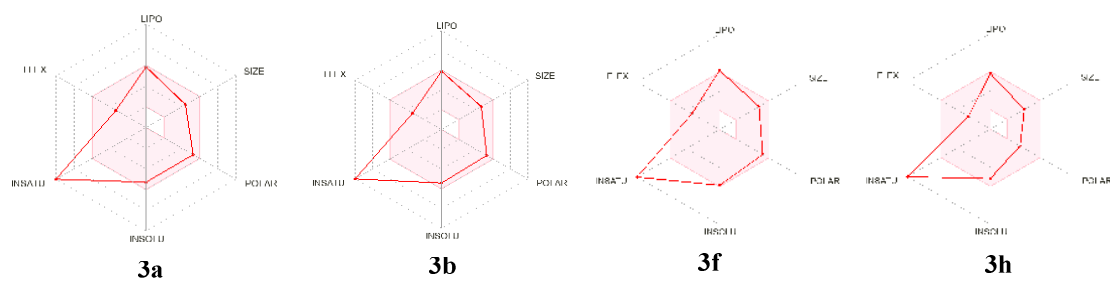

**Figure S7.** Druglikeness map for the most active (*E/Z*)-4-(2-((5-nitrofuran/furan-2-yl)methylene)hydrazineyl)-2-phenylquinazolines **3a**, **3b**, **3f** and **3h**.



**Table S1.** *In vitro* cytotoxicity using macrophage J774.1A of the compounds **3a**, **3b** and **3f** in absence and presence of Cu<sup>2+</sup> and Fe<sup>3+</sup> cations.

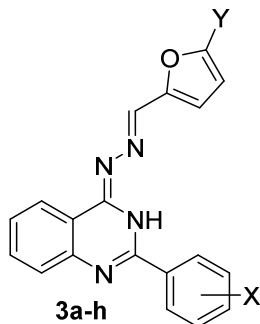

| Entries | Comps<br>(X, Y)                    | CC <sub>50</sub> (±S.D.), macrophages J774.1A |                  |                  |
|---------|------------------------------------|-----------------------------------------------|------------------|------------------|
|         |                                    | No metal                                      | Fe <sup>3+</sup> | Cu <sup>2+</sup> |
| 1       | <b>2a</b> (H, NO <sub>2</sub> )    | <b>15.06 ± 0.11</b>                           | 14.87 ± 0.89     | 14.78 ± 0.15     |
| 2       | <b>2b</b> (4-F, NO <sub>2</sub> )  | <b>69.06 ± 3.99</b>                           | 65.56 ± 2.79     | 64.45 ± 3.88     |
| 6       | <b>2f</b> (3-Cl, NO <sub>2</sub> ) | <b>41.55 ± 1.87</b>                           | 43.01 ± 1.99     | 40.01 ± 1.82     |

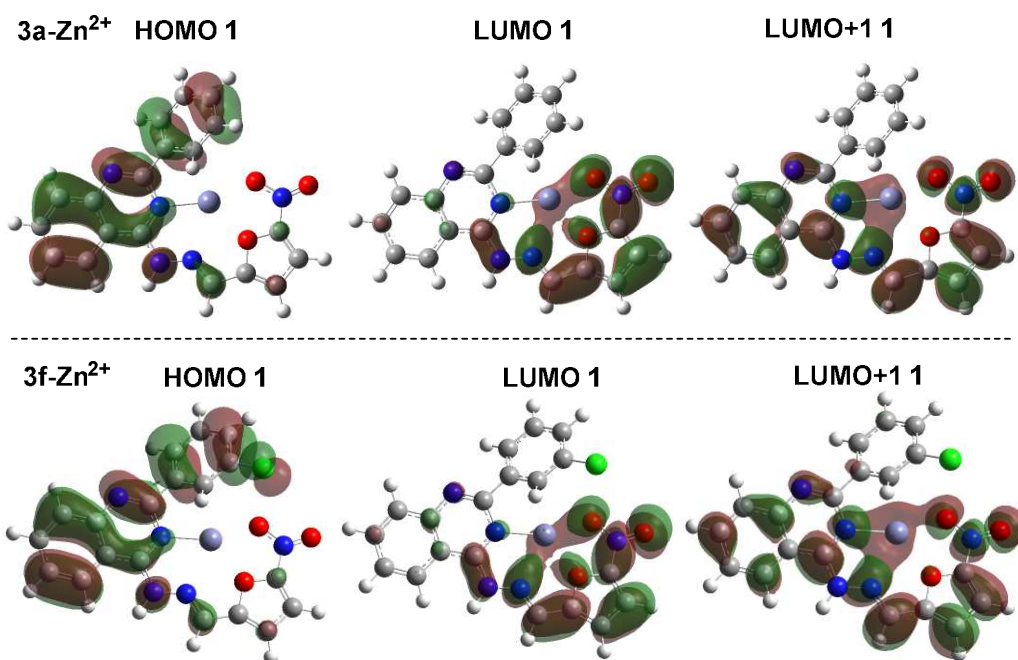

**Figure S8.** HOMO, LUMO and LUMO+1 orbital maps for (*E/Z*)-4-(2-((5-nitrofuranyl)methylene)hydrazineyl)-2-phenylquinazolines **3a** and **3f** in complexation with Zn (II) cation.

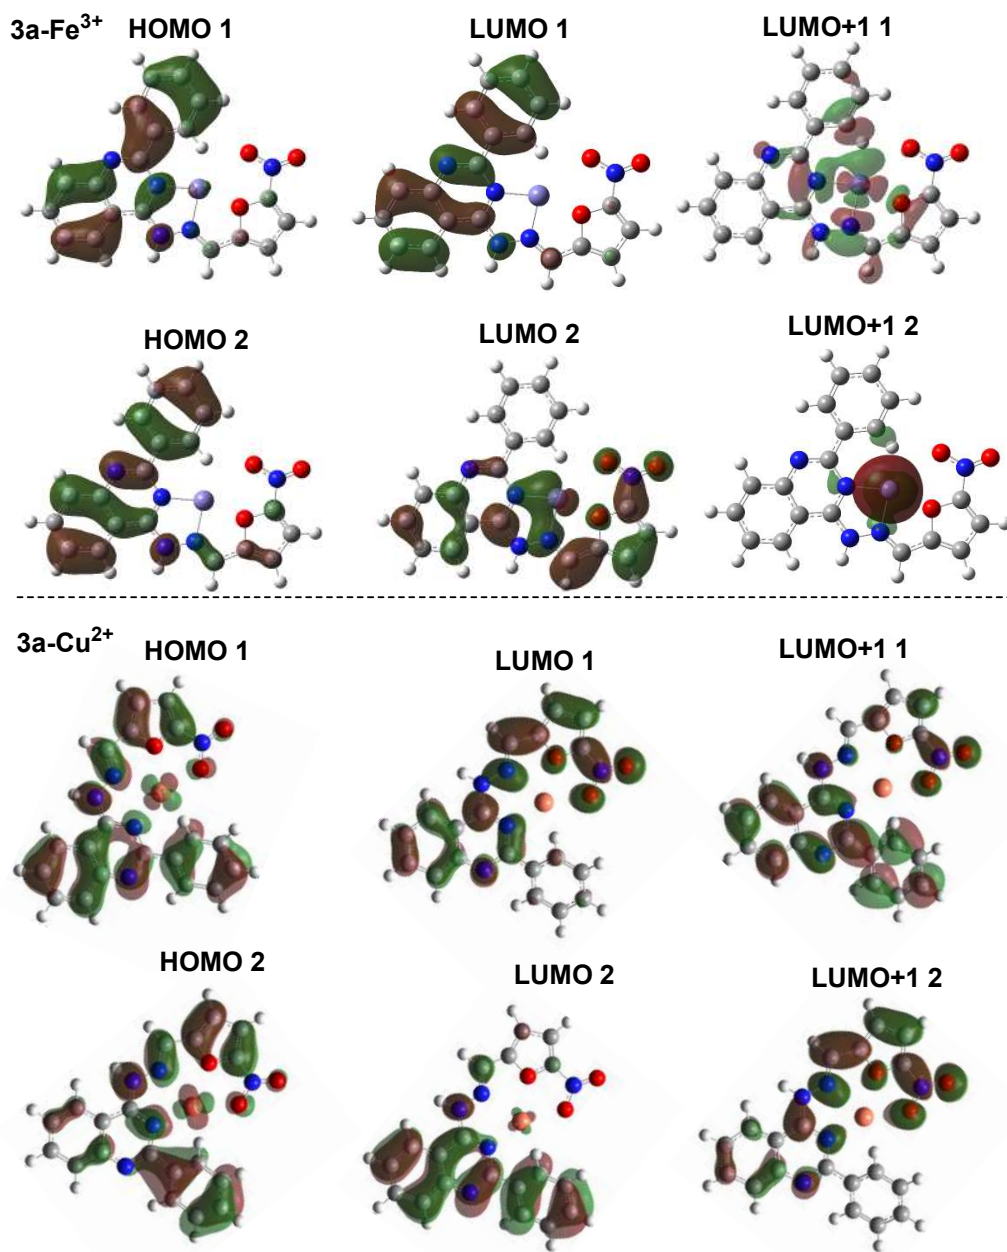

**Figure S9.** HOMO1, HOMO2, LUMO1, LUMO2, LUMO+1 1 and LUMO+1 2 orbital maps for (*E/Z*)-4-(2-((5-nitrofuran)methylene)hydrazineyl)-2-phenylquinazoline **3a** in complexation with Fe (III) and Cu (II) cations.

## 8. References

- [1] (a) Romero, A.H., Aguilera, E., Gotopo, L., Charris, J., Rodríguez, N., Oviedo, H., Dávila, B., Cabrera, G., Cerecetto, H. (2022) Synthesis, Antitrypanosomal and Mechanistic Studies of a Series of 2-Arylquinazolin-4-hydrazines: Hydrazine Moiety as Selective, Safe and Specific Pharmacophore to Design Antitrypanosomal Agents Targeting NO release. *ACS Omega* (accepted).
- [2] Romero, A.H., Medina, R., Alcalá, A.M., García-Marchan, Y., Nuñez-Duran, J., Leañez, J., Mihoba, A., Ciangherotti, C., Serrano-Martín, X., Lopez, S.E. (2017) Design, synthesis, structure-activity relationship and mechanism of action studies of a series of 4-chloro-1-phthalazinyl hydrazones as a potent agent against *Leishmania braziliensis*. *Eur. J. Med. Chem.* 127, 606-620.
- [3] Romero, A.H., Rodríguez, N., Lopez, S.E., Oviedo, H. (2019) Antileishmanial activity, mechanism of action study and molecular docking of 1,4-bis(substituted benzalhydrazino)phthalazines. *Arch. Pharm. (Weinheim)*, 352, e1800299.
- [4] Álvarez, G., Martínez, J., Varela, J., Birriel, E., Cruces, E., Gabay, M., Leal, S.M., Escobar, P., Aguirre-López, B., Cabrera, N., Tuena-de Gómez-Puyou, M., Gómez-Puyou, A., Pérez-Montfort, R., Yaluff, G., Torres, S., Serna, E., Vera de Bilbao, N., González, M., Cerecetto, H. (2015) Development of bis-thiazoles as inhibitors of triosephosphate isomerase from *Trypanosoma cruzi*. Identification of new non-mutagenic agents that are active *in vivo*. *Eur. J. Med. Chem.* 100, 246-256.
- [5] Ramírez-Macías, I., Marín, C., Chahboun, R., Olmo, F., Messouri, I., Huertas, O., Rosales, M.J., Gutierrez-Sánchez, R., Alvarez-Manzaneda, E., Sánchez-Moreno, M. (2012) In vitro evaluation of new terpenoid derivatives against *Leishmania infantum* and *Leishmania braziliensis*. *Mem. Inst Oswaldo Cruz*, 107, 370-376.
- [6] Cariello, N.F., Piegorsch, W.W. (1996) The Ames test: The two-fold rule revisited. *Mut. Res.* 369, 23-31.
- [7] Graph Pad Prism Software Inc. 4.02 for windows. May 17<sup>th</sup> 1992-2004.
- [8] Baell, J.B., Holloway, G.A. (2010) New Substructure Filters for Removal of Pan Assay Interference Compounds (PAINS) from Screening Libraries and for Their Exclusion in Bioassays. *J. Med. Chem.* 53, 2719-2740.
- [9] Swiss-ADME, Swiss Institute of Bioinformatics. <http://www.swissadme.ch/index.php>
- [10] Romero, A.H., Rodríguez, N., Oviedo, H. (2019) 2-Aryl-quinazolin-4(3*H*)-ones as

an inhibitor of leishmania folate pathway: *In vitro* biological evaluation, mechanism studies and molecular docking. *Bioorg. Chem.* 83, 145-153.

[11] Shimasaki, H. (1994). *Methods Enzymol.* 233, 338-346.

[12] (a) Becke, A.D. (1993) A new mixing of Hartree–Fock and local density-functional theories. *J. Chem. Phys.* 98, 1372. (b) Petersson, G.A., Al-Laham, M.A. (1991) A complete basis set model chemistry. II. Open-shell systems and the total energies of the first-row atoms. *J. Chem. Phys.* 94, 6081.

[13] Frisch, M.J., Trucks, G.W., Schlegel, H.B., Scuseria, G.E., Robb, M.A., Cheeseman, J.R., Scalmani, G., Barone, V., Mennucci, B., Petersson, G.A. et al. Gaussian 09; Revision A.1, Gaussian, Inc.: Wallingford, CT, 2009.

[14] Acosta, M., Gotopo, L., Gamboa, N., Rodríguez, J., Henriques, G., Cabrera, G., Romero, A.H. (2022) Antimalarial Activity of Highly Coordinative Fused-Heterocycles Targeting  $\beta$ -Hematin Crystallization. *ACS Omega* 7, 7499-7514.

[15] D.G. Gourley, A. Schuttelkopf, G. Leonard, J. Luba, L. Hardy, S. Beverley, W.N. Hunter. Pteridine Reductase Mechanism Correlates Pterin Metabolism with Drug Resistance in Trypanosomatid Parasites. *Nat. Struct. Biol.* 2001, 8, 521-525.

[16] P. Chitnumsub, J. Yuvaniyama, Y. Yuthavong. Trypanosoma cruzi Dihydrofolate Reductase-Thymidylate Synthase complexed with NADPH, dUMP and C-448 antifolate, deposited in PDB in 2009, (10.2210/pdb3inv/pdb).

[17] Guex, N., Peitsch, M., Schwede, T., Diemand, A., DeepView/Swiss-PdbViewer V4.0.1.

[18] Thompson, M.A., 2004 , ArgusLab 4.0 Planaria Software LLC, Seattle, WA.

[19] Young, D.C. 2009. Computational Drug Design. A guide for computational and Medicinal Chemistry. USA. John Wiley&Sons inc. P 141.

## 9. Theoretical Output of the tested compounds

### 9.1 (E/Z)-4-(2-((5-nitrofuran-2-yl)methylene)hydrazineyl)-2-phenylquinazoline **3a**

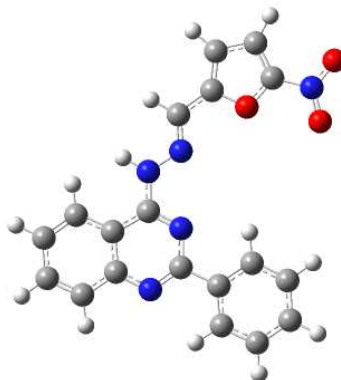

#### Optimized geometry:

Cycle 1 Pass 1 IDiag 1:  
FoFJK: IHMeth= 1 ICntrl= 0 DoSepK=T KAlg= 0 IICent= 0 FoldK=F  
IRaf= 1 NMat= 1 IRICut= 1 DoRegI=T DoRafI=F ISym2E= 0.  
FoFCou: FMM=F IPFlag= 0 FMFlag= 100000 FMFlg1= 0  
NFxFlg= 0 DoJE=T BraDBF=F KetDBF=F FulRan=T  
wScrn= 0.000000 ICntrl= 500 IOpCl= 0 IICent= 0 NGrid= 0  
NMat0= 1 NMatS0= 1 NMatT0= 0 NMatD0= 1 NMtDS0= 0  
NMtDT0= 0

Symmetry not used in FoFCou.

E= -1230.55631681931

DIIS: error= 2.45D-08 at cycle 1 NSaved= 1.

NSaved= 1 IEnMin= 1 EnMin= -1230.55631681931 IErMin= 1 ErrMin= 2.45D-08

ErrMax= 2.45D-08 0.00D+00 EMaxC= 1.00D-01 BMatC= 2.05D-13 BMatP= 2.05D-13

IDIUse=1 WtCom= 1.00D+00 WtEn= 0.00D+00

Coeff-Com: 0.100D+01

Coeff: 0.100D+01

Gap= 0.211 Goal= None Shift= 0.000

RMSDP=2.49D-09 MaxDP=1.76D-07 OVMMax= 3.53D-07

SCF Done: E(RCAM-B3LYP) = -1230.55631682 A.U. after 1 cycles

NFock= 1 Conv=0.25D-08 -V/T= 2.0087

KE= 1.219914373228D+03 PE=-7.221

902069917D+03 EE= 2.592503998689D+03

#### Standard orientation:

| Center Number | Atomic Number | Atomic Type | Coordinates (Angstroms) |           |          |
|---------------|---------------|-------------|-------------------------|-----------|----------|
|               |               |             | X                       | Y         | Z        |
| 1             | 6             | 0           | -4.247690               | -3.665229 | 0.000253 |
| 2             | 6             | 0           | -2.954563               | -3.208537 | 0.000052 |

|    |   |   |           |           |           |
|----|---|---|-----------|-----------|-----------|
| 3  | 6 | 0 | -2.686385 | -1.821562 | -0.000014 |
| 4  | 6 | 0 | -3.762476 | -0.903235 | 0.000157  |
| 5  | 6 | 0 | -5.087064 | -1.401627 | 0.000363  |
| 6  | 6 | 0 | -5.321820 | -2.750722 | 0.000405  |
| 7  | 1 | 0 | -4.446578 | -4.731311 | 0.000293  |
| 8  | 1 | 0 | -2.148096 | -3.935518 | -0.000059 |
| 9  | 6 | 0 | -1.387872 | -1.209100 | -0.000234 |
| 10 | 1 | 0 | -5.892852 | -0.676872 | 0.000488  |
| 11 | 1 | 0 | -6.340629 | -3.124084 | 0.000566  |
| 12 | 6 | 0 | -2.330169 | 0.870475  | -0.000062 |
| 13 | 7 | 0 | -3.570994 | 0.442532  | 0.000132  |
| 14 | 7 | 0 | -1.222549 | 0.083180  | -0.000251 |
| 15 | 7 | 0 | -0.265759 | -2.015098 | -0.000416 |
| 16 | 7 | 0 | 0.969444  | -1.496484 | -0.000351 |
| 17 | 6 | 0 | -2.084951 | 2.332841  | -0.000082 |
| 18 | 6 | 0 | -0.779734 | 2.828732  | -0.000200 |
| 19 | 6 | 0 | -3.159697 | 3.224899  | 0.000007  |
| 20 | 6 | 0 | -0.555065 | 4.198829  | -0.000225 |
| 21 | 1 | 0 | 0.046213  | 2.127722  | -0.000287 |
| 22 | 6 | 0 | -2.930664 | 4.592630  | -0.000019 |
| 23 | 1 | 0 | -4.166683 | 2.825340  | 0.000101  |
| 24 | 6 | 0 | -1.628076 | 5.083035  | -0.000135 |
| 25 | 1 | 0 | 0.462341  | 4.576100  | -0.000321 |
| 26 | 1 | 0 | -3.770446 | 5.280172  | 0.000047  |
| 27 | 1 | 0 | -1.450509 | 6.153931  | -0.000161 |
| 28 | 1 | 0 | -0.381375 | -3.021126 | -0.000289 |
| 29 | 6 | 0 | 1.952771  | -2.312092 | -0.000370 |
| 30 | 1 | 0 | 1.828615  | -3.400594 | -0.000396 |
| 31 | 6 | 0 | 3.317430  | -1.836498 | -0.000221 |
| 32 | 6 | 0 | 4.504165  | -2.522873 | -0.000199 |
| 33 | 8 | 0 | 3.546671  | -0.502928 | -0.000057 |
| 34 | 6 | 0 | 5.533294  | -1.547981 | 0.000010  |
| 35 | 1 | 0 | 4.618982  | -3.596411 | -0.000301 |
| 36 | 6 | 0 | 4.882191  | -0.355819 | 0.000091  |
| 37 | 1 | 0 | 6.602288  | -1.686636 | 0.000113  |
| 38 | 7 | 0 | 5.400556  | 0.974223  | 0.000341  |
| 39 | 8 | 0 | 4.608070  | 1.900720  | 0.000431  |
| 40 | 8 | 0 | 6.623022  | 1.066436  | 0.000448  |

-----  
Rotational constants (GHZ): 0.2387349 0.1058125 0.0733169  
Leave Link 202 at Fri Sep 9 14:01:56 2022, MaxMem= 2147483648 cpu:

**Orbital energies and kinetic energies (alpha):**

|   |   | 1          | 2         |
|---|---|------------|-----------|
| 1 | O | -19.327516 | 29.025810 |
| 2 | O | -19.255362 | 29.033123 |
| 3 | O | -19.252746 | 29.033049 |
| 4 | O | -14.659852 | 21.965616 |
| 5 | O | -14.495797 | 21.957540 |

|    |   |            |           |
|----|---|------------|-----------|
| 6  | O | -14.477339 | 21.963441 |
| 7  | O | -14.399516 | 21.959970 |
| 8  | O | -14.393725 | 21.960626 |
| 9  | O | -10.377018 | 15.880684 |
| 10 | O | -10.365160 | 15.882509 |
| 11 | O | -10.359641 | 15.881483 |
| 12 | O | -10.333149 | 15.877503 |
| 13 | O | -10.332846 | 15.882058 |
| 14 | O | -10.311221 | 15.881275 |
| 15 | O | -10.305752 | 15.878403 |
| 16 | O | -10.297814 | 15.878865 |
| 17 | O | -10.291702 | 15.876726 |
| 18 | O | -10.290496 | 15.880559 |
| 19 | O | -10.282274 | 15.874590 |
| 20 | O | -10.281665 | 15.884087 |
| 21 | O | -10.272431 | 15.878989 |
| 22 | O | -10.255354 | 15.878273 |
| 23 | O | -10.252917 | 15.877647 |
| 24 | O | -10.249789 | 15.877954 |
| 25 | O | -10.248179 | 15.881828 |
| 26 | O | -10.248023 | 15.877929 |
| 27 | O | -10.246190 | 15.881410 |
| 28 | O | -1.320738  | 2.494041  |
| 29 | O | -1.242013  | 2.494710  |
| 30 | O | -1.144032  | 1.997016  |
| 31 | O | -1.139674  | 2.801317  |
| 32 | O | -1.070953  | 1.829727  |
| 33 | O | -0.991429  | 1.982037  |
| 34 | O | -0.964383  | 1.683034  |
| 35 | O | -0.936453  | 1.883855  |
| 36 | O | -0.929033  | 1.873429  |
| 37 | O | -0.926002  | 1.516875  |
| 38 | O | -0.906575  | 1.966091  |
| 39 | O | -0.863273  | 1.712135  |
| 40 | O | -0.849713  | 1.631254  |
| 41 | O | -0.816748  | 1.767973  |
| 42 | O | -0.813336  | 1.659509  |
| 43 | O | -0.808441  | 1.798534  |
| 44 | O | -0.748022  | 1.813924  |
| 45 | O | -0.743083  | 1.659318  |
| 46 | O | -0.719606  | 1.654400  |
| 47 | O | -0.711801  | 1.861357  |
| 48 | O | -0.697151  | 1.594095  |
| 49 | O | -0.671856  | 1.597187  |
| 50 | O | -0.666059  | 1.519355  |
| 51 | O | -0.660274  | 1.560840  |
| 52 | O | -0.648064  | 1.745184  |
| 53 | O | -0.628280  | 2.197155  |
| 54 | O | -0.623948  | 1.673188  |
| 55 | O | -0.622037  | 1.550056  |

|     |   |           |          |
|-----|---|-----------|----------|
| 56  | O | -0.602230 | 1.542942 |
| 57  | O | -0.592529 | 1.567989 |
| 58  | O | -0.578560 | 2.480987 |
| 59  | O | -0.573698 | 1.351565 |
| 60  | O | -0.560480 | 1.635317 |
| 61  | O | -0.557202 | 1.517597 |
| 62  | O | -0.539173 | 1.304187 |
| 63  | O | -0.537512 | 1.544186 |
| 64  | O | -0.535140 | 1.408726 |
| 65  | O | -0.517692 | 1.518244 |
| 66  | O | -0.514805 | 1.374610 |
| 67  | O | -0.507860 | 1.388037 |
| 68  | O | -0.505234 | 1.598480 |
| 69  | O | -0.494621 | 1.251632 |
| 70  | O | -0.493539 | 1.536841 |
| 71  | O | -0.480103 | 2.036844 |
| 72  | O | -0.477081 | 1.587607 |
| 73  | O | -0.471215 | 1.231597 |
| 74  | O | -0.450741 | 1.532791 |
| 75  | O | -0.444451 | 0.986779 |
| 76  | O | -0.432428 | 1.441849 |
| 77  | O | -0.422172 | 1.173589 |
| 78  | O | -0.404648 | 1.210112 |
| 79  | O | -0.398974 | 1.514247 |
| 80  | O | -0.389904 | 1.447556 |
| 81  | O | -0.382317 | 1.918303 |
| 82  | O | -0.380352 | 1.631117 |
| 83  | O | -0.377419 | 2.358941 |
| 84  | O | -0.368842 | 2.330763 |
| 85  | O | -0.361647 | 2.574561 |
| 86  | O | -0.358156 | 1.998009 |
| 87  | O | -0.353227 | 1.400770 |
| 88  | O | -0.334427 | 1.177239 |
| 89  | O | -0.311927 | 1.259548 |
| 90  | O | -0.308095 | 1.961370 |
| 91  | O | -0.292219 | 1.126889 |
| 92  | O | -0.284047 | 1.451741 |
| 93  | O | -0.264157 | 1.454084 |
| 94  | V | -0.053086 | 2.099493 |
| 95  | V | -0.017720 | 1.694727 |
| 96  | V | 0.001524  | 1.537037 |
| 97  | V | 0.017447  | 1.769876 |
| 98  | V | 0.058150  | 1.429273 |
| 99  | V | 0.066534  | 1.402748 |
| 100 | V | 0.092107  | 1.162844 |
| 101 | V | 0.092887  | 1.733979 |
| 102 | V | 0.107329  | 2.062734 |
| 103 | V | 0.129620  | 1.302956 |
| 104 | V | 0.130706  | 1.675283 |
| 105 | V | 0.148788  | 1.043257 |



|     |   |          |          |
|-----|---|----------|----------|
| 106 | V | 0.154488 | 1.739024 |
| 107 | V | 0.164123 | 0.964546 |
| 108 | V | 0.168351 | 1.276233 |
| 109 | V | 0.178056 | 1.646792 |
| 110 | V | 0.191388 | 1.170139 |
| 111 | V | 0.201730 | 1.485491 |
| 112 | V | 0.213953 | 0.992584 |
| 113 | V | 0.221608 | 1.304031 |
| 114 | V | 0.227921 | 1.843356 |
| 115 | V | 0.234825 | 1.825129 |
| 116 | V | 0.239941 | 1.759456 |
| 117 | V | 0.243577 | 1.499702 |
| 118 | V | 0.245597 | 1.880270 |
| 119 | V | 0.255569 | 1.321327 |
| 120 | V | 0.265275 | 1.663528 |
| 121 | V | 0.276529 | 2.001277 |
| 122 | V | 0.281462 | 1.832154 |
| 123 | V | 0.284120 | 2.282067 |
| 124 | V | 0.307542 | 1.926831 |
| 125 | V | 0.317293 | 2.496474 |
| 126 | V | 0.319921 | 2.106588 |
| 127 | V | 0.328544 | 2.481173 |
| 128 | V | 0.339673 | 2.199009 |
| 129 | V | 0.353697 | 1.770153 |
| 130 | V | 0.361683 | 1.897543 |
| 131 | V | 0.369460 | 1.683645 |
| 132 | V | 0.376382 | 1.676387 |
| 133 | V | 0.389358 | 1.747554 |
| 134 | V | 0.400363 | 2.261689 |
| 135 | V | 0.406964 | 2.095531 |
| 136 | V | 0.410589 | 2.293334 |
| 137 | V | 0.422754 | 2.068847 |
| 138 | V | 0.435125 | 2.424773 |
| 139 | V | 0.446083 | 1.921894 |
| 140 | V | 0.455437 | 2.096622 |
| 141 | V | 0.475879 | 2.150113 |
| 142 | V | 0.487717 | 2.379440 |
| 143 | V | 0.499766 | 2.291772 |
| 144 | V | 0.527295 | 1.916007 |
| 145 | V | 0.536348 | 2.011109 |
| 146 | V | 0.544980 | 2.015283 |
| 147 | V | 0.549615 | 1.999376 |
| 148 | V | 0.560242 | 2.265120 |
| 149 | V | 0.569511 | 2.220763 |
| 150 | V | 0.577169 | 2.405859 |
| 151 | V | 0.577675 | 2.087241 |
| 152 | V | 0.584046 | 2.016016 |
| 153 | V | 0.593624 | 2.229647 |
| 154 | V | 0.598370 | 2.022356 |
| 155 | V | 0.605979 | 2.297783 |

|     |   |          |          |
|-----|---|----------|----------|
| 156 | V | 0.609792 | 2.224202 |
| 157 | V | 0.616395 | 2.497419 |
| 158 | V | 0.619448 | 2.507731 |
| 159 | V | 0.623923 | 2.103889 |
| 160 | V | 0.624644 | 2.312509 |
| 161 | V | 0.638429 | 2.324492 |
| 162 | V | 0.638754 | 2.142609 |
| 163 | V | 0.640283 | 2.238112 |
| 164 | V | 0.642252 | 2.120406 |
| 165 | V | 0.646464 | 2.466125 |
| 166 | V | 0.655172 | 2.078376 |
| 167 | V | 0.657728 | 2.057375 |
| 168 | V | 0.660140 | 2.235149 |
| 169 | V | 0.663575 | 2.163947 |
| 170 | V | 0.666584 | 2.067811 |
| 171 | V | 0.666633 | 2.346748 |
| 172 | V | 0.669988 | 2.574207 |
| 173 | V | 0.671649 | 2.162151 |
| 174 | V | 0.677360 | 2.431237 |
| 175 | V | 0.686168 | 2.190194 |
| 176 | V | 0.690655 | 2.116317 |
| 177 | V | 0.691505 | 2.355032 |
| 178 | V | 0.696843 | 2.179643 |
| 179 | V | 0.706551 | 2.366096 |
| 180 | V | 0.708604 | 2.726565 |
| 181 | V | 0.711565 | 2.344903 |
| 182 | V | 0.726994 | 2.263825 |
| 183 | V | 0.737369 | 2.744100 |
| 184 | V | 0.737663 | 2.235686 |
| 185 | V | 0.741503 | 2.298633 |
| 186 | V | 0.755882 | 3.151033 |
| 187 | V | 0.768771 | 2.734082 |
| 188 | V | 0.800511 | 2.300391 |
| 189 | V | 0.806819 | 2.531126 |
| 190 | V | 0.814222 | 2.531299 |
| 191 | V | 0.826828 | 2.614755 |
| 192 | V | 0.827123 | 2.431380 |
| 193 | V | 0.833942 | 2.680873 |
| 194 | V | 0.839116 | 2.712874 |
| 195 | V | 0.846247 | 2.673759 |
| 196 | V | 0.850527 | 2.363022 |
| 197 | V | 0.852368 | 2.480438 |
| 198 | V | 0.868635 | 2.640231 |
| 199 | V | 0.872812 | 2.605910 |
| 200 | V | 0.875386 | 2.556870 |
| 201 | V | 0.877892 | 2.549191 |
| 202 | V | 0.880525 | 2.714491 |
| 203 | V | 0.890966 | 2.628719 |
| 204 | V | 0.898920 | 2.733250 |
| 205 | V | 0.900009 | 2.633047 |

|     |   |          |          |
|-----|---|----------|----------|
| 206 | V | 0.903654 | 2.422021 |
| 207 | V | 0.917108 | 2.376339 |
| 208 | V | 0.926218 | 2.715227 |
| 209 | V | 0.930202 | 2.675454 |
| 210 | V | 0.938071 | 2.401485 |
| 211 | V | 0.952938 | 2.398159 |
| 212 | V | 0.960428 | 2.753105 |
| 213 | V | 0.966755 | 2.595909 |
| 214 | V | 0.980986 | 2.579293 |
| 215 | V | 0.983120 | 2.664179 |
| 216 | V | 0.986148 | 2.542085 |
| 217 | V | 0.986407 | 3.402680 |
| 218 | V | 1.000332 | 2.574362 |
| 219 | V | 1.017635 | 2.545882 |
| 220 | V | 1.025213 | 2.643838 |
| 221 | V | 1.025438 | 2.647638 |
| 222 | V | 1.028647 | 2.609779 |
| 223 | V | 1.037043 | 2.543466 |
| 224 | V | 1.043299 | 2.588435 |
| 225 | V | 1.053092 | 3.379903 |
| 226 | V | 1.060289 | 2.465242 |
| 227 | V | 1.077395 | 2.617526 |
| 228 | V | 1.085683 | 3.261972 |
| 229 | V | 1.092135 | 2.573530 |
| 230 | V | 1.099681 | 2.593077 |
| 231 | V | 1.106134 | 2.261148 |
| 232 | V | 1.132954 | 2.408776 |
| 233 | V | 1.137181 | 2.479309 |
| 234 | V | 1.147362 | 2.380910 |
| 235 | V | 1.153552 | 2.463513 |
| 236 | V | 1.168181 | 2.318273 |
| 237 | V | 1.172749 | 2.464352 |
| 238 | V | 1.199122 | 2.805460 |
| 239 | V | 1.218486 | 2.504759 |
| 240 | V | 1.229253 | 2.596471 |
| 241 | V | 1.245782 | 2.468516 |
| 242 | V | 1.262492 | 2.590680 |
| 243 | V | 1.271556 | 2.585333 |
| 244 | V | 1.272897 | 2.400977 |
| 245 | V | 1.281152 | 2.653276 |
| 246 | V | 1.284739 | 2.390131 |
| 247 | V | 1.291452 | 2.397148 |
| 248 | V | 1.311589 | 2.651529 |
| 249 | V | 1.320978 | 2.634880 |
| 250 | V | 1.335003 | 2.614010 |
| 251 | V | 1.341776 | 2.418074 |
| 252 | V | 1.346665 | 2.478151 |
| 253 | V | 1.347909 | 2.668855 |
| 254 | V | 1.361050 | 2.478371 |
| 255 | V | 1.366045 | 2.440721 |

|     |   |          |          |
|-----|---|----------|----------|
| 256 | V | 1.368824 | 2.567196 |
| 257 | V | 1.368964 | 2.506885 |
| 258 | V | 1.385820 | 2.497366 |
| 259 | V | 1.392192 | 2.506755 |
| 260 | V | 1.401886 | 2.830772 |
| 261 | V | 1.403088 | 2.452365 |
| 262 | V | 1.434394 | 2.462476 |
| 263 | V | 1.441490 | 2.728140 |
| 264 | V | 1.450329 | 2.531560 |
| 265 | V | 1.458266 | 2.534226 |
| 266 | V | 1.464364 | 2.594638 |
| 267 | V | 1.469309 | 2.561340 |
| 268 | V | 1.471168 | 2.730676 |
| 269 | V | 1.471910 | 2.682819 |
| 270 | V | 1.480485 | 2.587199 |
| 271 | V | 1.490012 | 2.497098 |
| 272 | V | 1.505176 | 2.543725 |
| 273 | V | 1.509752 | 2.564000 |
| 274 | V | 1.520999 | 2.713287 |
| 275 | V | 1.529482 | 2.623032 |
| 276 | V | 1.530389 | 2.662662 |
| 277 | V | 1.545658 | 2.752739 |
| 278 | V | 1.566608 | 2.726907 |
| 279 | V | 1.578003 | 2.687769 |
| 280 | V | 1.582015 | 2.694930 |
| 281 | V | 1.601294 | 2.701020 |
| 282 | V | 1.604183 | 3.014709 |
| 283 | V | 1.652533 | 2.967392 |
| 284 | V | 1.662998 | 2.985434 |
| 285 | V | 1.679546 | 3.166665 |
| 286 | V | 1.685988 | 2.738987 |
| 287 | V | 1.709596 | 3.055133 |
| 288 | V | 1.720354 | 3.025443 |
| 289 | V | 1.780743 | 2.840692 |
| 290 | V | 1.797913 | 3.010374 |
| 291 | V | 1.808946 | 3.174274 |
| 292 | V | 1.828465 | 2.912205 |
| 293 | V | 1.830416 | 3.076220 |
| 294 | V | 1.846093 | 3.171569 |
| 295 | V | 1.859081 | 3.152298 |
| 296 | V | 1.873254 | 3.201091 |
| 297 | V | 1.874373 | 3.324163 |
| 298 | V | 1.876512 | 2.864943 |
| 299 | V | 1.878864 | 3.158232 |
| 300 | V | 1.880546 | 2.927790 |
| 301 | V | 1.892690 | 3.209320 |
| 302 | V | 1.895270 | 2.971777 |
| 303 | V | 1.911126 | 3.164800 |
| 304 | V | 1.912792 | 3.197970 |
| 305 | V | 1.939442 | 3.235603 |

|     |   |          |          |
|-----|---|----------|----------|
| 306 | V | 1.948428 | 3.248962 |
| 307 | V | 1.957503 | 3.194681 |
| 308 | V | 1.964624 | 3.413394 |
| 309 | V | 1.965343 | 3.273422 |
| 310 | V | 1.976792 | 3.251857 |
| 311 | V | 1.977402 | 3.180336 |
| 312 | V | 1.977880 | 3.041843 |
| 313 | V | 1.983504 | 3.094635 |
| 314 | V | 1.993830 | 3.300405 |
| 315 | V | 2.004248 | 3.497718 |
| 316 | V | 2.021614 | 3.433455 |
| 317 | V | 2.021914 | 3.093576 |
| 318 | V | 2.025985 | 3.356012 |
| 319 | V | 2.034567 | 3.152300 |
| 320 | V | 2.049236 | 3.463463 |
| 321 | V | 2.056390 | 2.994483 |
| 322 | V | 2.061664 | 3.324144 |
| 323 | V | 2.063197 | 3.026678 |
| 324 | V | 2.065842 | 3.507822 |
| 325 | V | 2.088008 | 3.017403 |
| 326 | V | 2.089048 | 3.502572 |
| 327 | V | 2.111247 | 3.364867 |
| 328 | V | 2.124090 | 3.457253 |
| 329 | V | 2.135253 | 3.216723 |
| 330 | V | 2.141421 | 3.497282 |
| 331 | V | 2.150619 | 3.419796 |
| 332 | V | 2.151253 | 3.183256 |
| 333 | V | 2.158288 | 3.421475 |
| 334 | V | 2.163477 | 3.794898 |
| 335 | V | 2.190936 | 3.661396 |
| 336 | V | 2.213232 | 3.810470 |
| 337 | V | 2.217672 | 3.365791 |
| 338 | V | 2.232734 | 3.591633 |
| 339 | V | 2.236411 | 3.356972 |
| 340 | V | 2.247621 | 3.373697 |
| 341 | V | 2.269915 | 3.693200 |
| 342 | V | 2.279517 | 3.757159 |
| 343 | V | 2.304292 | 3.478873 |
| 344 | V | 2.313254 | 3.798165 |
| 345 | V | 2.324228 | 3.426642 |
| 346 | V | 2.332534 | 3.501681 |
| 347 | V | 2.334612 | 3.919275 |
| 348 | V | 2.347148 | 3.513842 |
| 349 | V | 2.380356 | 3.907688 |
| 350 | V | 2.383400 | 3.504772 |
| 351 | V | 2.388339 | 3.550370 |
| 352 | V | 2.396614 | 3.520518 |
| 353 | V | 2.405325 | 3.528737 |
| 354 | V | 2.410619 | 3.838565 |
| 355 | V | 2.418267 | 3.760519 |

|     |   |          |          |
|-----|---|----------|----------|
| 356 | V | 2.426090 | 3.888281 |
| 357 | V | 2.434309 | 3.779604 |
| 358 | V | 2.436818 | 3.384645 |
| 359 | V | 2.446819 | 3.363965 |
| 360 | V | 2.455308 | 3.630472 |
| 361 | V | 2.456792 | 3.355903 |
| 362 | V | 2.463850 | 3.586057 |
| 363 | V | 2.481597 | 3.455175 |
| 364 | V | 2.484509 | 3.757801 |
| 365 | V | 2.496476 | 3.432081 |
| 366 | V | 2.505178 | 3.493979 |
| 367 | V | 2.512521 | 3.928539 |
| 368 | V | 2.517155 | 3.602828 |
| 369 | V | 2.524388 | 3.891879 |
| 370 | V | 2.531726 | 3.832741 |
| 371 | V | 2.534529 | 3.543540 |
| 372 | V | 2.535175 | 3.732731 |
| 373 | V | 2.555748 | 3.910917 |
| 374 | V | 2.582152 | 3.918699 |
| 375 | V | 2.587863 | 3.765258 |
| 376 | V | 2.590438 | 4.019457 |
| 377 | V | 2.606736 | 4.007792 |
| 378 | V | 2.615041 | 3.707744 |
| 379 | V | 2.619822 | 4.171649 |
| 380 | V | 2.629704 | 3.962986 |
| 381 | V | 2.641336 | 4.138348 |
| 382 | V | 2.644172 | 3.641385 |
| 383 | V | 2.649582 | 4.030950 |
| 384 | V | 2.661641 | 3.649919 |
| 385 | V | 2.684138 | 4.009273 |
| 386 | V | 2.688667 | 3.880254 |
| 387 | V | 2.690277 | 3.710765 |
| 388 | V | 2.703192 | 3.749335 |
| 389 | V | 2.723966 | 4.018082 |
| 390 | V | 2.740080 | 4.534533 |
| 391 | V | 2.747905 | 4.211382 |
| 392 | V | 2.749800 | 3.949999 |
| 393 | V | 2.764539 | 4.273624 |
| 394 | V | 2.768275 | 3.914204 |
| 395 | V | 2.777612 | 3.913308 |
| 396 | V | 2.784921 | 3.892050 |
| 397 | V | 2.793623 | 4.298772 |
| 398 | V | 2.801949 | 4.452530 |
| 399 | V | 2.803417 | 3.988729 |
| 400 | V | 2.807060 | 4.321753 |
| 401 | V | 2.845123 | 4.390442 |
| 402 | V | 2.850468 | 3.842045 |
| 403 | V | 2.860759 | 4.426630 |
| 404 | V | 2.873395 | 4.070742 |
| 405 | V | 2.874678 | 4.487622 |

|     |   |          |           |
|-----|---|----------|-----------|
| 406 | V | 2.888190 | 4.410671  |
| 407 | V | 2.890381 | 4.466917  |
| 408 | V | 2.912901 | 4.599377  |
| 409 | V | 2.940138 | 4.694522  |
| 410 | V | 2.952939 | 4.893560  |
| 411 | V | 2.967014 | 5.087709  |
| 412 | V | 2.968645 | 4.707443  |
| 413 | V | 2.978864 | 4.657702  |
| 414 | V | 2.997752 | 4.684201  |
| 415 | V | 3.009750 | 4.585472  |
| 416 | V | 3.056215 | 4.644355  |
| 417 | V | 3.094806 | 4.866710  |
| 418 | V | 3.143427 | 4.842014  |
| 419 | V | 3.146174 | 4.752384  |
| 420 | V | 3.161433 | 4.454877  |
| 421 | V | 3.177986 | 5.011225  |
| 422 | V | 3.223055 | 4.964650  |
| 423 | V | 3.253123 | 4.890087  |
| 424 | V | 3.274948 | 5.012196  |
| 425 | V | 3.293087 | 4.950015  |
| 426 | V | 3.303558 | 4.949161  |
| 427 | V | 3.326610 | 4.868040  |
| 428 | V | 3.330407 | 4.868692  |
| 429 | V | 3.331507 | 5.026529  |
| 430 | V | 3.351525 | 4.878779  |
| 431 | V | 3.364616 | 5.199192  |
| 432 | V | 3.411950 | 5.114060  |
| 433 | V | 3.430196 | 5.328903  |
| 434 | V | 3.505772 | 5.226091  |
| 435 | V | 3.526206 | 5.280920  |
| 436 | V | 3.543233 | 5.354146  |
| 437 | V | 3.581179 | 5.506904  |
| 438 | V | 3.603979 | 5.692776  |
| 439 | V | 3.622232 | 5.449428  |
| 440 | V | 3.685213 | 5.976144  |
| 441 | V | 3.764619 | 8.618362  |
| 442 | V | 3.786518 | 7.693065  |
| 443 | V | 3.933282 | 8.779196  |
| 444 | V | 3.935529 | 7.423514  |
| 445 | V | 3.973838 | 9.989864  |
| 446 | V | 4.008732 | 6.039206  |
| 447 | V | 4.082369 | 10.396891 |
| 448 | V | 4.129006 | 10.209396 |
| 449 | V | 4.161222 | 10.146942 |
| 450 | V | 4.190426 | 10.090022 |
| 451 | V | 4.197749 | 10.113033 |
| 452 | V | 4.209641 | 10.125430 |
| 453 | V | 4.219236 | 10.105138 |
| 454 | V | 4.226328 | 10.142707 |
| 455 | V | 4.246625 | 10.157609 |

|     |   |          |           |
|-----|---|----------|-----------|
| 456 | V | 4.272289 | 10.187873 |
| 457 | V | 4.373992 | 10.084415 |
| 458 | V | 4.381707 | 10.118418 |
| 459 | V | 4.395858 | 9.994798  |
| 460 | V | 4.437588 | 10.600591 |
| 461 | V | 4.504305 | 10.429617 |
| 462 | V | 4.522439 | 10.075595 |
| 463 | V | 4.523967 | 10.256895 |
| 464 | V | 4.574131 | 10.511127 |
| 465 | V | 4.589307 | 10.878250 |
| 466 | V | 4.642807 | 10.025514 |
| 467 | V | 4.775660 | 11.103655 |
| 468 | V | 4.827527 | 10.299130 |
| 469 | V | 4.911218 | 10.206319 |
| 470 | V | 4.970058 | 10.227859 |

Total kinetic energy from orbitals= 1.219914374160D+03

9.2. (*E/Z*)-4-(2-((5-nitrofur-2-yl)methylene)hydrazineyl)-2-phenylquinazolines **3a** in complex with Fe(III)

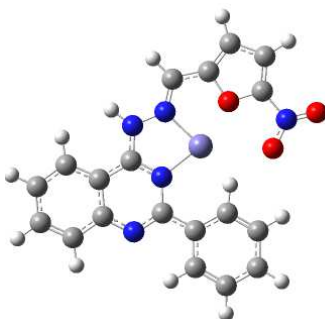

**Standard orientation:**

| Center Number | Atomic Number | Atomic Type | Coordinates (Angstroms) |           |           |
|---------------|---------------|-------------|-------------------------|-----------|-----------|
|               |               |             | X                       | Y         | Z         |
| 1             | 6             | 0           | -5.242032               | -2.486374 | 0.000111  |
| 2             | 6             | 0           | -3.843083               | -2.553370 | -0.000795 |
| 3             | 6             | 0           | -3.093082               | -1.380376 | -0.000209 |
| 4             | 6             | 0           | -3.768421               | -0.111198 | 0.001259  |
| 5             | 6             | 0           | -5.190757               | -0.075003 | 0.002258  |
| 6             | 6             | 0           | -5.910773               | -1.254054 | 0.001669  |
| 7             | 1             | 0           | -5.814804               | -3.408544 | -0.000413 |
| 8             | 1             | 0           | -3.382171               | -3.536253 | -0.002044 |
| 9             | 6             | 0           | -1.666019               | -1.298680 | -0.000888 |
| 10            | 1             | 0           | -5.676044               | 0.895240  | 0.003403  |
| 11            | 1             | 0           | -6.995681               | -1.230682 | 0.002372  |
| 12            | 6             | 0           | -1.780133               | 1.062131  | 0.000483  |
| 13            | 7             | 0           | -3.106857               | 1.049127  | 0.001613  |
| 14            | 7             | 0           | -1.029863               | -0.110250 | -0.000616 |



|    |    |   |           |           |           |
|----|----|---|-----------|-----------|-----------|
| 15 | 7  | 0 | -0.861492 | -2.388335 | -0.001726 |
| 16 | 7  | 0 | 0.481046  | -2.134084 | -0.001698 |
| 17 | 6  | 0 | -1.109710 | 2.328481  | 0.000195  |
| 18 | 6  | 0 | 0.300295  | 2.460902  | -0.001775 |
| 19 | 6  | 0 | -1.896980 | 3.520305  | 0.001843  |
| 20 | 6  | 0 | 0.903999  | 3.688180  | -0.002024 |
| 21 | 1  | 0 | 1.002312  | 1.617810  | -0.003169 |
| 22 | 6  | 0 | -1.294535 | 4.762322  | 0.001604  |
| 23 | 1  | 0 | -2.975725 | 3.425378  | 0.003330  |
| 24 | 6  | 0 | 0.096773  | 4.856717  | -0.000318 |
| 25 | 1  | 0 | 1.985311  | 3.769327  | -0.003490 |
| 26 | 1  | 0 | -1.901303 | 5.661108  | 0.002910  |
| 27 | 1  | 0 | 0.577731  | 5.830641  | -0.000526 |
| 28 | 1  | 0 | -1.204420 | -3.343514 | -0.001422 |
| 29 | 6  | 0 | 1.420658  | -3.025665 | 0.000162  |
| 30 | 1  | 0 | 1.239756  | -4.099887 | 0.001184  |
| 31 | 6  | 0 | 2.751413  | -2.490729 | 0.001054  |
| 32 | 6  | 0 | 4.040701  | -2.928569 | 0.002413  |
| 33 | 8  | 0 | 2.744056  | -1.093229 | 0.000713  |
| 34 | 6  | 0 | 4.886823  | -1.766792 | 0.002854  |
| 35 | 1  | 0 | 4.374623  | -3.959473 | 0.003037  |
| 36 | 6  | 0 | 4.055413  | -0.704596 | 0.001690  |
| 37 | 1  | 0 | 5.969665  | -1.740455 | 0.003801  |
| 38 | 7  | 0 | 4.223388  | 0.723081  | 0.000737  |
| 39 | 8  | 0 | 3.163524  | 1.365750  | -0.001620 |
| 40 | 8  | 0 | 5.341212  | 1.155881  | 0.002176  |
| 41 | 26 | 0 | 0.880906  | -0.265633 | -0.002953 |

-----  
Rotational constants (GHZ): 0.2560772 0.1300303 0.0862397

Cycle 8 Pass 1 IDiag 1:

RMSU= 1.92D-08 CP: 1.00D+00 1.04D+00 8.33D-01 1.04D+00 7.44D-01

E= -1230.50034853501 Delta-E= -0.000000000166 Rises=F Damp=F

DIIS: error= 9.90D-08 at cycle 6 NSaved= 6.

NSaved= 6 IEnMin= 6 EnMin= -1230.50034853501 IErMin= 6 ErrMin= 9.90D-08

ErrMax= 9.90D-08 0.00D+00 EMaxC= 1.00D-01 BMatC= 2.29D-11 BMatP= 5.56D-10

IDIUse=1 WtCom= 1.00D+00 WtEn= 0.00D+00

Coeff-Com: 0.727D-03-0.276D-01-0.948D-02 0.128D+00 0.293D+00 0.615D+00

Coeff: 0.727D-03-0.276D-01-0.948D-02 0.128D+00 0.293D+00 0.615D+00

Gap= 0.197 Goal= None Shift= 0.000

Gap= 0.197 Goal= None Shift= 0.000

RMSDP=7.77D-09 MaxDP=4.12D-07 DE=-1.66D-10 OVMax= 8.61D-07

SCF Done: E(UCAM-B3LYP) = -1230.50034854 A.U. after 8 cycles

NFock= 8 Conv=0.78D-08 -V/T= 2.0066

<Sx>= 0.0000 <Sy>= 0.0000 <Sz>= 0.0000 <S\*\*2>= 0.0000 S= 0.0000

<L.S>= 0.000000000000E+00

KE= 1.222477580584D+03 PE=-7.379816511258D+03 EE= 2.670955262334D+03

Annihilation of the first spin contaminant:

S\*\*2 before annihilation 0.0000, after 0.0000  
 Leave Link 502 at Wed Nov 2 12:11:04 2022, MaxMem= 2147483648 cpu: 1626.2  
 (Enter /opt/gaussian/g09/1701.exe)  
 Compute integral first derivatives.  
 ... and contract with generalized density number 0.  
 Leave Link 701 at Wed Nov 2 12:11:04 2022, MaxMem= 2147483648 cpu: 4.7  
 (Enter /opt/gaussian/g09/1702.exe)  
 L702 exits ... SP integral derivatives will be done elsewhere.  
 Leave Link 702 at Wed Nov 2 12:11:04 2022, MaxMem= 2147483648 cpu: 0.9  
 (Enter /opt/gaussian/g09/1703.exe)  
 Compute integral first derivatives, UseDBF=F ICtDFT= 0.  
 Integral derivatives from FoFJK, PRISM(SPFD).  
 Calling FoFJK, ICntrl= 2127 FMM=F ISym2X=0 IICent= 0 IOpCIX= 1 NMat=1  
 NMatS=1 NMatT=0.  
 FoFJK: IHMeth= 1 ICntrl= 2127 DoSepK=T KAlg= 0 IICent= 0 FoldK=F  
 IRaf= 1 NMat= 1 IRICut= 1 DoRegI=T DoRafI=F ISym2E= 0.  
 FoFCou: FMM=F IPFlag= 0 FMFlag= 100000 FMFlg1= 800  
 NFxFlg= 0 DoJE=F BraDBF=F KetDBF=F FulRan=T  
 wScrn= 0.000000 ICntrl= 2527 IOpCl= 0 IICent= 0 NGrid= 0  
 NMat0= 1 NMatS0= 1 NMatT0= 0 NMatD0= 1 NMtDS0= 0  
 NMtDT0= 0  
 Symmetry not used in FoFCou.  
 Leave Link 703 at Wed Nov 2 12:12:46 2022, MaxMem= 2147483648 cpu: 809.6  
 (Enter /opt/gaussian/g09/1716.exe)  
 Dipole =-1.29672797D-01-3.25664643D+00 1.35986156D-03  
 \*\*\*\*\* Axes restored to original set \*\*\*\*\*  
 Cartesian Forces: Max 0.067369325 RMS 0.016207602  
 Leave Link 716 at Wed Nov 2 12:12:46 2022, MaxMem= 2147483648 cpu: 0.7  
 (Enter /opt/gaussian/g09/1122.exe)  
 CPIOFr: IOpCl= 1 IRwI=-1 IRwCP= 731 ICalc= 4 LCPTot= 338287 Len1MO= 1090774 IndFrg= 5792157  
 Restoring MOs from calculation 1 to rwf.  
 CPIOFr: IOpCl= 1 IRwI=-2 IRwCP= 731 ICalc= 0 LCPTot= 338287 Len1MO= 1090774 IndFrg= 1429061  
 Counterpoise corrected energy = -1352.996105014944  
 BSSE energy = -0.133081306096  
 sum of monomers = -1351.538250634977  
 complexation energy = -831.31 kcal/mole (raw)  
**complexation energy = -914.82 kcal/mole (corrected)**  
 Leave Link 122 at Wed Nov 2 12:12:46 2022, MaxMem= 2147483648 cpu: 0.5  
 (Enter /opt/gaussian/g09/1716.exe)  
 Rotating derivatives to standard orientation.  
 Dipole =-1.69536516D+00-3.17169454D+00 6.32188506D-04

#### Orbital energies and kinetic energies (alpha):

|   |   | 1          | 2         |
|---|---|------------|-----------|
| 1 | O | -19.725999 | 29.117625 |
| 2 | O | -19.615450 | 29.122444 |

|    |   |            |           |
|----|---|------------|-----------|
| 3  | O | -19.607622 | 29.122516 |
| 4  | O | -15.013875 | 22.048548 |
| 5  | O | -14.908169 | 22.049812 |
| 6  | O | -14.898917 | 22.046686 |
| 7  | O | -14.846432 | 22.050308 |
| 8  | O | -14.792328 | 22.051931 |
| 9  | O | -10.778748 | 15.952939 |
| 10 | O | -10.748922 | 15.951033 |
| 11 | O | -10.746688 | 15.952331 |
| 12 | O | -10.738365 | 15.952842 |
| 13 | O | -10.729926 | 15.951556 |
| 14 | O | -10.685495 | 15.953429 |
| 15 | O | -10.668665 | 15.953898 |
| 16 | O | -10.663897 | 15.953852 |
| 17 | O | -10.659195 | 15.953016 |
| 18 | O | -10.656132 | 15.956154 |
| 19 | O | -10.649595 | 15.954179 |
| 20 | O | -10.648595 | 15.953350 |
| 21 | O | -10.631688 | 15.955890 |
| 22 | O | -10.626759 | 15.955572 |
| 23 | O | -10.625289 | 15.956814 |
| 24 | O | -10.625222 | 15.955156 |
| 25 | O | -10.621238 | 15.954127 |
| 26 | O | -10.618608 | 15.953086 |
| 27 | O | -10.600252 | 15.952865 |
| 28 | O | -4.055218  | 2.062319  |
| 29 | O | -2.857638  | 3.846621  |
| 30 | O | -2.854500  | 3.839228  |
| 31 | O | -2.794204  | 3.831054  |
| 32 | O | -1.680834  | 2.483759  |
| 33 | O | -1.624474  | 2.512326  |
| 34 | O | -1.554724  | 1.970040  |
| 35 | O | -1.500407  | 2.793228  |
| 36 | O | -1.471322  | 1.851732  |
| 37 | O | -1.399296  | 1.950125  |
| 38 | O | -1.359368  | 1.970460  |
| 39 | O | -1.318314  | 1.608539  |
| 40 | O | -1.298422  | 1.596475  |
| 41 | O | -1.296847  | 1.793869  |
| 42 | O | -1.278169  | 1.934486  |
| 43 | O | -1.236776  | 1.671735  |
| 44 | O | -1.221066  | 1.636960  |
| 45 | O | -1.192783  | 1.610137  |
| 46 | O | -1.187467  | 1.860525  |
| 47 | O | -1.171675  | 1.721987  |
| 48 | O | -1.142448  | 1.655797  |
| 49 | O | -1.127957  | 1.921664  |
| 50 | O | -1.097303  | 1.765186  |
| 51 | O | -1.092181  | 1.677197  |
| 52 | O | -1.073626  | 1.678586  |

|     |   |           |          |
|-----|---|-----------|----------|
| 53  | O | -1.052777 | 1.729220 |
| 54  | O | -1.043373 | 1.575129 |
| 55  | O | -1.036129 | 1.620676 |
| 56  | O | -1.033617 | 1.779564 |
| 57  | O | -1.006209 | 1.745057 |
| 58  | O | -0.994218 | 2.173078 |
| 59  | O | -0.986464 | 1.674808 |
| 60  | O | -0.984822 | 1.546503 |
| 61  | O | -0.969786 | 1.557704 |
| 62  | O | -0.959529 | 1.729386 |
| 63  | O | -0.956818 | 1.466531 |
| 64  | O | -0.950551 | 1.769797 |
| 65  | O | -0.936513 | 1.959690 |
| 66  | O | -0.928662 | 2.485749 |
| 67  | O | -0.911167 | 1.946757 |
| 68  | O | -0.903898 | 1.787401 |
| 69  | O | -0.896521 | 1.484573 |
| 70  | O | -0.890759 | 1.610668 |
| 71  | O | -0.885839 | 1.726579 |
| 72  | O | -0.872683 | 1.671983 |
| 73  | O | -0.869858 | 1.590609 |
| 74  | O | -0.867225 | 1.649324 |
| 75  | O | -0.864196 | 1.660061 |
| 76  | O | -0.861063 | 1.524651 |
| 77  | O | -0.849866 | 1.819898 |
| 78  | O | -0.845948 | 1.734609 |
| 79  | O | -0.841456 | 5.480043 |
| 80  | O | -0.838473 | 1.566887 |
| 81  | O | -0.815953 | 1.548538 |
| 82  | O | -0.802711 | 5.266880 |
| 83  | O | -0.801551 | 6.099777 |
| 84  | O | -0.800500 | 1.823689 |
| 85  | O | -0.786051 | 5.477361 |
| 86  | O | -0.780320 | 1.668169 |
| 87  | O | -0.778322 | 1.530444 |
| 88  | O | -0.765951 | 1.588466 |
| 89  | O | -0.762543 | 1.743048 |
| 90  | O | -0.759227 | 1.475649 |
| 91  | O | -0.744128 | 1.883216 |
| 92  | O | -0.731350 | 1.548754 |
| 93  | O | -0.730559 | 2.558892 |
| 94  | O | -0.721512 | 2.388202 |
| 95  | O | -0.717191 | 2.648495 |
| 96  | O | -0.703598 | 2.101061 |
| 97  | O | -0.691131 | 1.377670 |
| 98  | O | -0.667273 | 1.483807 |
| 99  | O | -0.664198 | 1.212606 |
| 100 | O | -0.644860 | 1.262359 |
| 101 | V | -0.505954 | 1.317669 |
| 102 | V | -0.445949 | 6.062714 |

|     |   |           |          |
|-----|---|-----------|----------|
| 103 | V | -0.441435 | 1.703432 |
| 104 | V | -0.381065 | 1.989403 |
| 105 | V | -0.379405 | 1.486830 |
| 106 | V | -0.357456 | 2.049308 |
| 107 | V | -0.329752 | 1.466935 |
| 108 | V | -0.308217 | 0.907192 |
| 109 | V | -0.290288 | 1.362699 |
| 110 | V | -0.281858 | 1.296995 |
| 111 | V | -0.275509 | 0.806855 |
| 112 | V | -0.273710 | 1.693378 |
| 113 | V | -0.266556 | 1.888517 |
| 114 | V | -0.262297 | 0.574262 |
| 115 | V | -0.235606 | 1.688878 |
| 116 | V | -0.231008 | 1.599579 |
| 117 | V | -0.230396 | 1.134229 |
| 118 | V | -0.215883 | 1.686833 |
| 119 | V | -0.197458 | 1.554918 |
| 120 | V | -0.194651 | 0.668903 |
| 121 | V | -0.179745 | 1.492663 |
| 122 | V | -0.171204 | 1.645297 |
| 123 | V | -0.164811 | 1.935887 |
| 124 | V | -0.162067 | 1.341651 |
| 125 | V | -0.151144 | 1.304282 |
| 126 | V | -0.143469 | 1.426323 |
| 127 | V | -0.126786 | 1.506638 |
| 128 | V | -0.122467 | 1.758065 |
| 129 | V | -0.117413 | 2.133386 |
| 130 | V | -0.106973 | 1.298734 |
| 131 | V | -0.104631 | 1.738354 |
| 132 | V | -0.101216 | 1.508951 |
| 133 | V | -0.097872 | 1.974980 |
| 134 | V | -0.091395 | 1.595478 |
| 135 | V | -0.085679 | 2.057295 |
| 136 | V | -0.079091 | 1.425026 |
| 137 | V | -0.070286 | 1.707479 |
| 138 | V | -0.060950 | 2.021287 |
| 139 | V | -0.052250 | 1.460069 |
| 140 | V | -0.046083 | 1.773813 |
| 141 | V | -0.041700 | 1.804650 |
| 142 | V | -0.033386 | 1.950559 |
| 143 | V | -0.026935 | 1.416222 |
| 144 | V | -0.022573 | 2.281758 |
| 145 | V | -0.012226 | 2.060543 |
| 146 | V | 0.000403  | 1.936787 |
| 147 | V | 0.005943  | 1.935640 |
| 148 | V | 0.016804  | 2.053504 |
| 149 | V | 0.029565  | 2.061204 |
| 150 | V | 0.032925  | 1.796022 |
| 151 | V | 0.045991  | 2.126938 |
| 152 | V | 0.051167  | 1.837459 |

|     |   |          |          |
|-----|---|----------|----------|
| 153 | V | 0.058428 | 2.386335 |
| 154 | V | 0.062618 | 2.334044 |
| 155 | V | 0.078057 | 2.214539 |
| 156 | V | 0.092128 | 1.926837 |
| 157 | V | 0.097638 | 2.335867 |
| 158 | V | 0.109178 | 2.232222 |
| 159 | V | 0.121625 | 2.626771 |
| 160 | V | 0.145862 | 2.497562 |
| 161 | V | 0.154913 | 2.370867 |
| 162 | V | 0.167001 | 2.458201 |
| 163 | V | 0.172298 | 2.088389 |
| 164 | V | 0.178518 | 2.316317 |
| 165 | V | 0.201347 | 2.602924 |
| 166 | V | 0.209055 | 2.229521 |
| 167 | V | 0.212637 | 2.495803 |
| 168 | V | 0.220723 | 2.304288 |
| 169 | V | 0.223971 | 2.148015 |
| 170 | V | 0.232865 | 2.129639 |
| 171 | V | 0.238378 | 2.291467 |
| 172 | V | 0.247483 | 2.461494 |
| 173 | V | 0.247994 | 2.186031 |
| 174 | V | 0.254246 | 2.061179 |
| 175 | V | 0.260718 | 2.115331 |
| 176 | V | 0.261864 | 2.299058 |
| 177 | V | 0.266722 | 2.439096 |
| 178 | V | 0.270701 | 2.214174 |
| 179 | V | 0.272232 | 2.136924 |
| 180 | V | 0.276984 | 2.337271 |
| 181 | V | 0.288420 | 2.529953 |
| 182 | V | 0.291651 | 2.767264 |
| 183 | V | 0.297822 | 2.137891 |
| 184 | V | 0.299175 | 2.574636 |
| 185 | V | 0.311901 | 2.308002 |
| 186 | V | 0.315740 | 2.065213 |
| 187 | V | 0.317179 | 2.239170 |
| 188 | V | 0.323253 | 2.236005 |
| 189 | V | 0.328550 | 2.131084 |
| 190 | V | 0.334095 | 2.470813 |
| 191 | V | 0.340947 | 2.187358 |
| 192 | V | 0.341754 | 2.093181 |
| 193 | V | 0.345258 | 2.321355 |
| 194 | V | 0.348357 | 2.419861 |
| 195 | V | 0.353472 | 2.180410 |
| 196 | V | 0.357281 | 2.404671 |
| 197 | V | 0.358838 | 2.161010 |
| 198 | V | 0.372787 | 2.388776 |
| 199 | V | 0.376786 | 2.209393 |
| 200 | V | 0.379384 | 2.259132 |
| 201 | V | 0.389857 | 2.217511 |
| 202 | V | 0.411015 | 2.378869 |

|     |   |          |          |
|-----|---|----------|----------|
| 203 | V | 0.414472 | 2.722229 |
| 204 | V | 0.420786 | 2.349409 |
| 205 | V | 0.439884 | 2.854138 |
| 206 | V | 0.443437 | 2.306738 |
| 207 | V | 0.455045 | 2.542250 |
| 208 | V | 0.457369 | 2.403893 |
| 209 | V | 0.466210 | 2.495815 |
| 210 | V | 0.478795 | 2.678058 |
| 211 | V | 0.487520 | 2.384113 |
| 212 | V | 0.496949 | 2.561522 |
| 213 | V | 0.503545 | 2.484618 |
| 214 | V | 0.508324 | 2.637562 |
| 215 | V | 0.517225 | 2.763717 |
| 216 | V | 0.522411 | 2.545279 |
| 217 | V | 0.531950 | 2.813647 |
| 218 | V | 0.538336 | 2.373160 |
| 219 | V | 0.544955 | 2.586596 |
| 220 | V | 0.548185 | 2.619375 |
| 221 | V | 0.549476 | 2.752552 |
| 222 | V | 0.556809 | 2.760444 |
| 223 | V | 0.560228 | 2.635170 |
| 224 | V | 0.567221 | 2.617151 |
| 225 | V | 0.573679 | 2.713667 |
| 226 | V | 0.578153 | 2.696091 |
| 227 | V | 0.579135 | 2.743564 |
| 228 | V | 0.581108 | 2.609284 |
| 229 | V | 0.595247 | 2.598546 |
| 230 | V | 0.609580 | 2.523471 |
| 231 | V | 0.618429 | 2.499082 |
| 232 | V | 0.622221 | 2.503344 |
| 233 | V | 0.633828 | 2.589292 |
| 234 | V | 0.640055 | 2.577333 |
| 235 | V | 0.648010 | 2.582601 |
| 236 | V | 0.650873 | 2.641091 |
| 237 | V | 0.657619 | 3.259232 |
| 238 | V | 0.658248 | 2.595538 |
| 239 | V | 0.672113 | 2.715689 |
| 240 | V | 0.680270 | 3.069574 |
| 241 | V | 0.682318 | 2.756897 |
| 242 | V | 0.699346 | 2.879818 |
| 243 | V | 0.714060 | 2.736442 |
| 244 | V | 0.715559 | 2.614503 |
| 245 | V | 0.726160 | 2.571686 |
| 246 | V | 0.728033 | 3.212311 |
| 247 | V | 0.740597 | 2.584058 |
| 248 | V | 0.751834 | 3.190808 |
| 249 | V | 0.752404 | 2.641515 |
| 250 | V | 0.759423 | 2.534729 |
| 251 | V | 0.778948 | 2.481005 |
| 252 | V | 0.788085 | 2.403526 |

|     |   |          |          |
|-----|---|----------|----------|
| 253 | V | 0.789357 | 2.579464 |
| 254 | V | 0.799588 | 2.349394 |
| 255 | V | 0.835709 | 2.513785 |
| 256 | V | 0.837552 | 2.772580 |
| 257 | V | 0.860948 | 2.537130 |
| 258 | V | 0.863310 | 2.761494 |
| 259 | V | 0.872374 | 2.625637 |
| 260 | V | 0.883436 | 2.401193 |
| 261 | V | 0.904773 | 2.535514 |
| 262 | V | 0.915287 | 2.406066 |
| 263 | V | 0.927648 | 2.564547 |
| 264 | V | 0.931591 | 2.435626 |
| 265 | V | 0.942760 | 2.797818 |
| 266 | V | 0.943037 | 2.744833 |
| 267 | V | 0.945881 | 2.490111 |
| 268 | V | 0.961862 | 2.765359 |
| 269 | V | 0.962043 | 2.437895 |
| 270 | V | 0.976237 | 2.765423 |
| 271 | V | 0.977268 | 2.457878 |
| 272 | V | 0.988883 | 2.752419 |
| 273 | V | 0.990784 | 2.499906 |
| 274 | V | 0.992548 | 2.472946 |
| 275 | V | 1.000313 | 2.798979 |
| 276 | V | 1.008881 | 2.527979 |
| 277 | V | 1.016900 | 2.810098 |
| 278 | V | 1.033487 | 2.524018 |
| 279 | V | 1.056877 | 2.446619 |
| 280 | V | 1.065994 | 3.011883 |
| 281 | V | 1.067843 | 2.454819 |
| 282 | V | 1.074438 | 2.765494 |
| 283 | V | 1.087801 | 3.009835 |
| 284 | V | 1.092773 | 2.551947 |
| 285 | V | 1.116280 | 3.027231 |
| 286 | V | 1.117105 | 2.518992 |
| 287 | V | 1.119689 | 2.568451 |
| 288 | V | 1.124652 | 2.658239 |
| 289 | V | 1.130903 | 2.597791 |
| 290 | V | 1.136914 | 2.937049 |
| 291 | V | 1.137949 | 2.555793 |
| 292 | V | 1.144469 | 2.550672 |
| 293 | V | 1.163907 | 2.675457 |
| 294 | V | 1.168211 | 2.861560 |
| 295 | V | 1.177962 | 2.663756 |
| 296 | V | 1.178846 | 2.732983 |
| 297 | V | 1.190090 | 2.979929 |
| 298 | V | 1.222027 | 3.133586 |
| 299 | V | 1.228398 | 3.084803 |
| 300 | V | 1.252127 | 2.814961 |
| 301 | V | 1.268445 | 2.795720 |
| 302 | V | 1.286746 | 3.071777 |



|     |   |          |          |
|-----|---|----------|----------|
| 303 | V | 1.300708 | 2.887396 |
| 304 | V | 1.319279 | 2.891339 |
| 305 | V | 1.336180 | 3.081818 |
| 306 | V | 1.355090 | 3.008549 |
| 307 | V | 1.385509 | 3.334332 |
| 308 | V | 1.409647 | 3.198423 |
| 309 | V | 1.417458 | 2.838041 |
| 310 | V | 1.442364 | 2.895337 |
| 311 | V | 1.444936 | 3.447114 |
| 312 | V | 1.452202 | 3.306048 |
| 313 | V | 1.465560 | 3.409503 |
| 314 | V | 1.485320 | 3.372181 |
| 315 | V | 1.485789 | 3.279491 |
| 316 | V | 1.488535 | 2.924178 |
| 317 | V | 1.489238 | 3.343213 |
| 318 | V | 1.502995 | 3.350389 |
| 319 | V | 1.507310 | 2.941332 |
| 320 | V | 1.513304 | 3.300804 |
| 321 | V | 1.528096 | 2.862281 |
| 322 | V | 1.538355 | 3.302720 |
| 323 | V | 1.545985 | 3.332780 |
| 324 | V | 1.560982 | 3.273397 |
| 325 | V | 1.566390 | 3.363770 |
| 326 | V | 1.585481 | 3.347289 |
| 327 | V | 1.588270 | 3.488968 |
| 328 | V | 1.600136 | 3.054866 |
| 329 | V | 1.602001 | 3.304722 |
| 330 | V | 1.612083 | 3.436147 |
| 331 | V | 1.617593 | 3.360663 |
| 332 | V | 1.621226 | 3.257210 |
| 333 | V | 1.629509 | 3.088313 |
| 334 | V | 1.630240 | 3.242724 |
| 335 | V | 1.644606 | 3.437003 |
| 336 | V | 1.647906 | 3.470286 |
| 337 | V | 1.648951 | 3.070041 |
| 338 | V | 1.654673 | 3.431936 |
| 339 | V | 1.656813 | 3.280901 |
| 340 | V | 1.685512 | 3.503711 |
| 341 | V | 1.694549 | 3.040722 |
| 342 | V | 1.699213 | 3.393601 |
| 343 | V | 1.705053 | 3.464476 |
| 344 | V | 1.713858 | 3.494784 |
| 345 | V | 1.718861 | 3.062339 |
| 346 | V | 1.724262 | 3.049269 |
| 347 | V | 1.726894 | 3.368891 |
| 348 | V | 1.748958 | 3.615536 |
| 349 | V | 1.751326 | 3.088192 |
| 350 | V | 1.764163 | 3.219317 |
| 351 | V | 1.766715 | 3.431010 |
| 352 | V | 1.769516 | 3.513136 |

|     |   |          |          |
|-----|---|----------|----------|
| 353 | V | 1.785495 | 3.595908 |
| 354 | V | 1.797465 | 3.321447 |
| 355 | V | 1.804227 | 3.524803 |
| 356 | V | 1.829563 | 3.823998 |
| 357 | V | 1.836211 | 3.669922 |
| 358 | V | 1.851972 | 3.348676 |
| 359 | V | 1.858817 | 3.671675 |
| 360 | V | 1.873618 | 3.791491 |
| 361 | V | 1.878783 | 3.805872 |
| 362 | V | 1.886166 | 3.373228 |
| 363 | V | 1.902343 | 3.437323 |
| 364 | V | 1.907205 | 3.770224 |
| 365 | V | 1.931401 | 3.886624 |
| 366 | V | 1.933876 | 3.481648 |
| 367 | V | 1.946303 | 3.496302 |
| 368 | V | 1.959847 | 3.870180 |
| 369 | V | 1.967392 | 3.481123 |
| 370 | V | 1.992652 | 3.898077 |
| 371 | V | 1.993979 | 3.498727 |
| 372 | V | 2.004823 | 3.532115 |
| 373 | V | 2.009055 | 3.889564 |
| 374 | V | 2.026351 | 3.529427 |
| 375 | V | 2.048448 | 3.604485 |
| 376 | V | 2.056792 | 3.479889 |
| 377 | V | 2.062561 | 3.773978 |
| 378 | V | 2.073937 | 3.594493 |
| 379 | V | 2.079362 | 3.565978 |
| 380 | V | 2.098230 | 3.504181 |
| 381 | V | 2.103883 | 3.923988 |
| 382 | V | 2.113407 | 3.737679 |
| 383 | V | 2.120343 | 3.910998 |
| 384 | V | 2.126566 | 3.310859 |
| 385 | V | 2.135071 | 3.558331 |
| 386 | V | 2.140689 | 3.874503 |
| 387 | V | 2.143340 | 3.331411 |
| 388 | V | 2.149080 | 3.740855 |
| 389 | V | 2.151199 | 3.437617 |
| 390 | V | 2.165870 | 3.795501 |
| 391 | V | 2.169940 | 3.590385 |
| 392 | V | 2.183695 | 3.831593 |
| 393 | V | 2.195384 | 3.821878 |
| 394 | V | 2.198049 | 3.605653 |
| 395 | V | 2.205263 | 3.962665 |
| 396 | V | 2.212581 | 3.889933 |
| 397 | V | 2.236581 | 4.041802 |
| 398 | V | 2.239010 | 3.713227 |
| 399 | V | 2.252568 | 4.075363 |
| 400 | V | 2.261248 | 4.112319 |
| 401 | V | 2.282174 | 3.991137 |
| 402 | V | 2.282565 | 3.645519 |

|     |   |          |          |
|-----|---|----------|----------|
| 403 | V | 2.291822 | 3.972493 |
| 404 | V | 2.298036 | 3.816409 |
| 405 | V | 2.298947 | 4.064520 |
| 406 | V | 2.305321 | 3.638270 |
| 407 | V | 2.324266 | 3.835158 |
| 408 | V | 2.325761 | 4.027363 |
| 409 | V | 2.331546 | 3.601514 |
| 410 | V | 2.354983 | 4.078677 |
| 411 | V | 2.367915 | 4.208733 |
| 412 | V | 2.367951 | 3.931468 |
| 413 | V | 2.377003 | 4.240779 |
| 414 | V | 2.391888 | 3.924674 |
| 415 | V | 2.406940 | 4.230897 |
| 416 | V | 2.412177 | 3.899045 |
| 417 | V | 2.417164 | 3.917994 |
| 418 | V | 2.418031 | 4.235290 |
| 419 | V | 2.437494 | 4.452158 |
| 420 | V | 2.448452 | 4.290225 |
| 421 | V | 2.461671 | 4.009787 |
| 422 | V | 2.469501 | 4.490858 |
| 423 | V | 2.482105 | 3.828875 |
| 424 | V | 2.485314 | 4.341950 |
| 425 | V | 2.491320 | 3.940307 |
| 426 | V | 2.499585 | 4.355874 |
| 427 | V | 2.517645 | 4.395769 |
| 428 | V | 2.535329 | 4.301360 |
| 429 | V | 2.571211 | 4.550041 |
| 430 | V | 2.583796 | 4.546724 |
| 431 | V | 2.589804 | 4.607555 |
| 432 | V | 2.608231 | 4.536599 |
| 433 | V | 2.621306 | 4.619231 |
| 434 | V | 2.646819 | 4.649423 |
| 435 | V | 2.672994 | 4.922281 |
| 436 | V | 2.684960 | 4.590537 |
| 437 | V | 2.722440 | 4.759097 |
| 438 | V | 2.726505 | 4.797914 |
| 439 | V | 2.764493 | 4.745304 |
| 440 | V | 2.768495 | 4.621065 |
| 441 | V | 2.810351 | 4.766895 |
| 442 | V | 2.834845 | 4.806688 |
| 443 | V | 2.858769 | 4.877247 |
| 444 | V | 2.879041 | 5.068993 |
| 445 | V | 2.902830 | 4.891145 |
| 446 | V | 2.932950 | 4.937791 |
| 447 | V | 2.960222 | 4.786317 |
| 448 | V | 2.965702 | 4.896956 |
| 449 | V | 2.989036 | 4.847695 |
| 450 | V | 2.999648 | 4.843563 |
| 451 | V | 3.014519 | 5.023087 |
| 452 | V | 3.020850 | 5.051630 |

|     |   |          |          |
|-----|---|----------|----------|
| 453 | V | 3.070756 | 5.024542 |
| 454 | V | 3.074954 | 5.144190 |
| 455 | V | 3.138916 | 5.100621 |
| 456 | V | 3.173660 | 5.201703 |
| 457 | V | 3.198624 | 5.210353 |
| 458 | V | 3.227155 | 5.259857 |
| 459 | V | 3.259817 | 5.352553 |
| 460 | V | 3.265638 | 5.275790 |
| 461 | V | 3.322583 | 5.550470 |
| 462 | V | 3.471395 | 5.539669 |
| 463 | V | 3.601946 | 5.634618 |
| 464 | V | 3.649144 | 5.649988 |
| 465 | V | 7.504365 | 3.566019 |

Orbital energies and kinetic energies (beta):

|    |   | 1          | 2         |
|----|---|------------|-----------|
| 1  | O | -19.725731 | 29.117844 |
| 2  | O | -19.615554 | 29.122358 |
| 3  | O | -19.607654 | 29.122495 |
| 4  | O | -15.013825 | 22.048584 |
| 5  | O | -14.908934 | 22.049414 |
| 6  | O | -14.899300 | 22.046373 |
| 7  | O | -14.846738 | 22.050196 |
| 8  | O | -14.796679 | 22.048265 |
| 9  | O | -10.778880 | 15.952811 |
| 10 | O | -10.749252 | 15.950764 |
| 11 | O | -10.747032 | 15.952039 |
| 12 | O | -10.737612 | 15.953408 |
| 13 | O | -10.729738 | 15.951712 |
| 14 | O | -10.684813 | 15.953920 |
| 15 | O | -10.668907 | 15.953692 |
| 16 | O | -10.664669 | 15.953181 |
| 17 | O | -10.658942 | 15.953231 |
| 18 | O | -10.658450 | 15.954131 |
| 19 | O | -10.650209 | 15.953601 |
| 20 | O | -10.648506 | 15.953382 |
| 21 | O | -10.634547 | 15.953398 |
| 22 | O | -10.630219 | 15.952571 |
| 23 | O | -10.628610 | 15.953821 |
| 24 | O | -10.627121 | 15.953524 |
| 25 | O | -10.622007 | 15.953455 |
| 26 | O | -10.616791 | 15.954613 |
| 27 | O | -10.599098 | 15.953808 |
| 28 | O | -3.950766  | 2.056192  |
| 29 | O | -2.744683  | 3.823895  |
| 30 | O | -2.733049  | 3.823474  |
| 31 | O | -2.693078  | 3.843371  |
| 32 | O | -1.680867  | 2.484005  |
| 33 | O | -1.623938  | 2.510382  |
| 34 | O | -1.555584  | 1.972458  |
| 35 | O | -1.500524  | 2.793377  |

|    |   |           |          |
|----|---|-----------|----------|
| 36 | O | -1.473643 | 1.851329 |
| 37 | O | -1.402655 | 1.965296 |
| 38 | O | -1.361609 | 1.974955 |
| 39 | O | -1.321995 | 1.602216 |
| 40 | O | -1.303182 | 1.549971 |
| 41 | O | -1.296993 | 1.839171 |
| 42 | O | -1.279139 | 1.935965 |
| 43 | O | -1.239454 | 1.671939 |
| 44 | O | -1.224321 | 1.639435 |
| 45 | O | -1.193977 | 1.601154 |
| 46 | O | -1.189752 | 1.821809 |
| 47 | O | -1.180024 | 1.770144 |
| 48 | O | -1.145238 | 1.651461 |
| 49 | O | -1.128222 | 1.924312 |
| 50 | O | -1.100258 | 1.759860 |
| 51 | O | -1.092352 | 1.657777 |
| 52 | O | -1.075171 | 1.685870 |
| 53 | O | -1.052557 | 1.683179 |
| 54 | O | -1.045993 | 1.576350 |
| 55 | O | -1.038417 | 1.628055 |
| 56 | O | -1.033687 | 1.756299 |
| 57 | O | -1.008268 | 1.739496 |
| 58 | O | -0.994791 | 2.192501 |
| 59 | O | -0.986126 | 1.546638 |
| 60 | O | -0.985611 | 1.650095 |
| 61 | O | -0.971404 | 1.534435 |
| 62 | O | -0.960310 | 1.656247 |
| 63 | O | -0.956681 | 1.428987 |
| 64 | O | -0.950535 | 1.719227 |
| 65 | O | -0.932850 | 1.752509 |
| 66 | O | -0.928811 | 2.500414 |
| 67 | O | -0.909568 | 1.604769 |
| 68 | O | -0.901633 | 1.829931 |
| 69 | O | -0.897240 | 1.467029 |
| 70 | O | -0.893485 | 1.396793 |
| 71 | O | -0.885671 | 1.494714 |
| 72 | O | -0.872787 | 1.579490 |
| 73 | O | -0.870914 | 1.503196 |
| 74 | O | -0.866667 | 1.556528 |
| 75 | O | -0.865363 | 1.515328 |
| 76 | O | -0.860542 | 1.438522 |
| 77 | O | -0.848918 | 1.713343 |
| 78 | O | -0.844771 | 1.452138 |
| 79 | O | -0.837891 | 1.622437 |
| 80 | O | -0.824754 | 1.230481 |
| 81 | O | -0.814655 | 1.257647 |
| 82 | O | -0.785182 | 1.288914 |
| 83 | O | -0.782858 | 1.509124 |
| 84 | O | -0.780141 | 1.531614 |
| 85 | O | -0.769927 | 2.083879 |

|     |   |           |          |
|-----|---|-----------|----------|
| 86  | O | -0.761429 | 1.764754 |
| 87  | O | -0.755882 | 4.275838 |
| 88  | O | -0.755785 | 1.794711 |
| 89  | O | -0.748411 | 4.389782 |
| 90  | O | -0.735778 | 2.538060 |
| 91  | O | -0.727581 | 2.992931 |
| 92  | O | -0.721073 | 2.667124 |
| 93  | O | -0.716276 | 2.728025 |
| 94  | O | -0.706478 | 2.547381 |
| 95  | O | -0.700774 | 1.311914 |
| 96  | O | -0.682538 | 1.293798 |
| 97  | O | -0.670400 | 1.610041 |
| 98  | O | -0.665276 | 1.274741 |
| 99  | O | -0.638811 | 1.379851 |
| 100 | V | -0.444135 | 2.204535 |
| 101 | V | -0.436687 | 4.540982 |
| 102 | V | -0.434063 | 4.671849 |
| 103 | V | -0.398453 | 1.565815 |
| 104 | V | -0.389358 | 5.992485 |
| 105 | V | -0.373551 | 2.820749 |
| 106 | V | -0.359561 | 2.121469 |
| 107 | V | -0.314042 | 1.262480 |
| 108 | V | -0.308260 | 2.511400 |
| 109 | V | -0.307098 | 1.350401 |
| 110 | V | -0.286492 | 1.236385 |
| 111 | V | -0.283407 | 1.382689 |
| 112 | V | -0.275424 | 0.832114 |
| 113 | V | -0.267731 | 1.998847 |
| 114 | V | -0.261515 | 0.603388 |
| 115 | V | -0.235700 | 1.734486 |
| 116 | V | -0.231592 | 1.613038 |
| 117 | V | -0.228720 | 1.167125 |
| 118 | V | -0.223526 | 1.846381 |
| 119 | V | -0.196324 | 1.654171 |
| 120 | V | -0.191640 | 0.615246 |
| 121 | V | -0.178366 | 1.518282 |
| 122 | V | -0.170703 | 1.635118 |
| 123 | V | -0.165159 | 1.961562 |
| 124 | V | -0.162505 | 1.345656 |
| 125 | V | -0.151499 | 1.276488 |
| 126 | V | -0.143308 | 1.462195 |
| 127 | V | -0.132005 | 1.766635 |
| 128 | V | -0.127424 | 1.521906 |
| 129 | V | -0.117991 | 2.125850 |
| 130 | V | -0.107675 | 2.002999 |
| 131 | V | -0.106938 | 1.309269 |
| 132 | V | -0.104997 | 1.783442 |
| 133 | V | -0.101391 | 1.490831 |
| 134 | V | -0.092418 | 1.593345 |
| 135 | V | -0.086224 | 2.044445 |

|     |   |           |          |
|-----|---|-----------|----------|
| 136 | V | -0.079401 | 1.409390 |
| 137 | V | -0.070341 | 1.730196 |
| 138 | V | -0.061927 | 2.052607 |
| 139 | V | -0.051341 | 1.436793 |
| 140 | V | -0.046900 | 1.884711 |
| 141 | V | -0.042429 | 1.776495 |
| 142 | V | -0.034649 | 1.943239 |
| 143 | V | -0.027582 | 1.380204 |
| 144 | V | -0.021883 | 2.424550 |
| 145 | V | -0.013182 | 2.046784 |
| 146 | V | -0.000499 | 1.988052 |
| 147 | V | 0.006006  | 1.894064 |
| 148 | V | 0.015579  | 2.065009 |
| 149 | V | 0.028627  | 2.067653 |
| 150 | V | 0.032819  | 1.799067 |
| 151 | V | 0.045648  | 2.145166 |
| 152 | V | 0.049993  | 1.823516 |
| 153 | V | 0.058158  | 2.391626 |
| 154 | V | 0.062546  | 2.344763 |
| 155 | V | 0.079394  | 2.203673 |
| 156 | V | 0.091829  | 1.935403 |
| 157 | V | 0.098758  | 2.376577 |
| 158 | V | 0.110491  | 2.386204 |
| 159 | V | 0.127125  | 2.743996 |
| 160 | V | 0.153567  | 2.557009 |
| 161 | V | 0.155517  | 2.361311 |
| 162 | V | 0.171712  | 2.102001 |
| 163 | V | 0.175169  | 2.327558 |
| 164 | V | 0.178333  | 2.338284 |
| 165 | V | 0.199916  | 2.612313 |
| 166 | V | 0.211581  | 2.490634 |
| 167 | V | 0.214744  | 2.244754 |
| 168 | V | 0.219713  | 2.311593 |
| 169 | V | 0.223797  | 2.153025 |
| 170 | V | 0.237088  | 2.156235 |
| 171 | V | 0.238864  | 2.298531 |
| 172 | V | 0.246389  | 2.472086 |
| 173 | V | 0.247532  | 2.324748 |
| 174 | V | 0.253210  | 2.071771 |
| 175 | V | 0.261286  | 2.299237 |
| 176 | V | 0.261497  | 2.319025 |
| 177 | V | 0.265809  | 2.424518 |
| 178 | V | 0.270223  | 2.234394 |
| 179 | V | 0.271157  | 2.297180 |
| 180 | V | 0.275788  | 2.339082 |
| 181 | V | 0.286013  | 2.504561 |
| 182 | V | 0.290036  | 2.765927 |
| 183 | V | 0.296915  | 2.164031 |
| 184 | V | 0.297791  | 2.600639 |
| 185 | V | 0.308396  | 2.049690 |

|     |   |          |          |
|-----|---|----------|----------|
| 186 | V | 0.308942 | 2.295507 |
| 187 | V | 0.316073 | 2.200246 |
| 188 | V | 0.321362 | 2.204928 |
| 189 | V | 0.326647 | 2.154262 |
| 190 | V | 0.331739 | 2.469637 |
| 191 | V | 0.341962 | 2.127433 |
| 192 | V | 0.343131 | 2.219886 |
| 193 | V | 0.343364 | 2.250168 |
| 194 | V | 0.346874 | 2.532685 |
| 195 | V | 0.347179 | 2.207688 |
| 196 | V | 0.355785 | 2.384937 |
| 197 | V | 0.361719 | 2.204435 |
| 198 | V | 0.373363 | 2.399101 |
| 199 | V | 0.375405 | 2.211725 |
| 200 | V | 0.377616 | 2.241108 |
| 201 | V | 0.385172 | 2.266512 |
| 202 | V | 0.409051 | 2.401098 |
| 203 | V | 0.416304 | 2.727699 |
| 204 | V | 0.419337 | 2.391468 |
| 205 | V | 0.439903 | 2.862572 |
| 206 | V | 0.440375 | 2.290549 |
| 207 | V | 0.455178 | 2.534603 |
| 208 | V | 0.455385 | 2.413878 |
| 209 | V | 0.467170 | 2.506661 |
| 210 | V | 0.478412 | 2.681005 |
| 211 | V | 0.483871 | 2.369335 |
| 212 | V | 0.496689 | 2.577313 |
| 213 | V | 0.503038 | 2.497039 |
| 214 | V | 0.508264 | 2.628555 |
| 215 | V | 0.516730 | 2.656921 |
| 216 | V | 0.523936 | 2.559024 |
| 217 | V | 0.532991 | 2.828344 |
| 218 | V | 0.535215 | 2.381921 |
| 219 | V | 0.544452 | 2.598203 |
| 220 | V | 0.548346 | 2.565021 |
| 221 | V | 0.552285 | 2.723095 |
| 222 | V | 0.552801 | 2.810142 |
| 223 | V | 0.561297 | 2.702096 |
| 224 | V | 0.567596 | 2.645278 |
| 225 | V | 0.573733 | 2.710660 |
| 226 | V | 0.577618 | 2.709237 |
| 227 | V | 0.580353 | 2.606128 |
| 228 | V | 0.583636 | 2.828161 |
| 229 | V | 0.595415 | 2.669471 |
| 230 | V | 0.609302 | 2.527085 |
| 231 | V | 0.618493 | 2.501981 |
| 232 | V | 0.621936 | 2.500822 |
| 233 | V | 0.634718 | 2.596386 |
| 234 | V | 0.638919 | 2.604549 |
| 235 | V | 0.647749 | 2.613428 |



|     |   |          |          |
|-----|---|----------|----------|
| 236 | V | 0.648977 | 2.638883 |
| 237 | V | 0.656994 | 3.212524 |
| 238 | V | 0.657540 | 2.605175 |
| 239 | V | 0.671872 | 2.728368 |
| 240 | V | 0.679026 | 3.110761 |
| 241 | V | 0.682224 | 2.757284 |
| 242 | V | 0.700396 | 2.883648 |
| 243 | V | 0.714144 | 2.717049 |
| 244 | V | 0.714305 | 2.634711 |
| 245 | V | 0.725881 | 2.585926 |
| 246 | V | 0.728621 | 3.224917 |
| 247 | V | 0.740239 | 2.549409 |
| 248 | V | 0.751314 | 2.629356 |
| 249 | V | 0.752647 | 3.212910 |
| 250 | V | 0.760408 | 2.585924 |
| 251 | V | 0.777264 | 2.469586 |
| 252 | V | 0.786643 | 2.387965 |
| 253 | V | 0.789829 | 2.621016 |
| 254 | V | 0.797905 | 2.347865 |
| 255 | V | 0.834331 | 2.537489 |
| 256 | V | 0.837514 | 2.762490 |
| 257 | V | 0.860588 | 2.552329 |
| 258 | V | 0.864534 | 2.788030 |
| 259 | V | 0.871864 | 2.631713 |
| 260 | V | 0.881636 | 2.401200 |
| 261 | V | 0.903489 | 2.532655 |
| 262 | V | 0.912862 | 2.401647 |
| 263 | V | 0.926071 | 2.569173 |
| 264 | V | 0.930341 | 2.439243 |
| 265 | V | 0.942435 | 2.823912 |
| 266 | V | 0.943421 | 2.705496 |
| 267 | V | 0.944286 | 2.494195 |
| 268 | V | 0.956310 | 2.420079 |
| 269 | V | 0.961858 | 2.814114 |
| 270 | V | 0.973452 | 2.468157 |
| 271 | V | 0.974980 | 2.763183 |
| 272 | V | 0.987583 | 2.470473 |
| 273 | V | 0.988549 | 2.762730 |
| 274 | V | 0.990838 | 2.505882 |
| 275 | V | 0.999961 | 2.802137 |
| 276 | V | 1.008663 | 2.528474 |
| 277 | V | 1.016764 | 2.815735 |
| 278 | V | 1.033124 | 2.525464 |
| 279 | V | 1.050623 | 2.449869 |
| 280 | V | 1.063191 | 2.454312 |
| 281 | V | 1.065408 | 3.011868 |
| 282 | V | 1.073325 | 2.756499 |
| 283 | V | 1.087993 | 3.024738 |
| 284 | V | 1.088521 | 2.548287 |
| 285 | V | 1.114389 | 2.522326 |

|     |   |          |          |
|-----|---|----------|----------|
| 286 | V | 1.116148 | 3.033882 |
| 287 | V | 1.117678 | 2.546861 |
| 288 | V | 1.121234 | 2.611510 |
| 289 | V | 1.127797 | 2.656309 |
| 290 | V | 1.132347 | 2.566805 |
| 291 | V | 1.135873 | 2.957132 |
| 292 | V | 1.138248 | 2.553927 |
| 293 | V | 1.162614 | 2.665205 |
| 294 | V | 1.167644 | 2.873501 |
| 295 | V | 1.175373 | 2.664680 |
| 296 | V | 1.177584 | 2.717811 |
| 297 | V | 1.189183 | 2.996271 |
| 298 | V | 1.221619 | 3.134741 |
| 299 | V | 1.228887 | 3.103094 |
| 300 | V | 1.250819 | 2.824075 |
| 301 | V | 1.267313 | 2.796673 |
| 302 | V | 1.285335 | 3.068406 |
| 303 | V | 1.302607 | 2.907936 |
| 304 | V | 1.318233 | 2.895756 |
| 305 | V | 1.334387 | 3.077220 |
| 306 | V | 1.354780 | 3.013179 |
| 307 | V | 1.384033 | 3.328130 |
| 308 | V | 1.408605 | 3.206365 |
| 309 | V | 1.417252 | 2.838171 |
| 310 | V | 1.439789 | 2.894128 |
| 311 | V | 1.443651 | 3.410440 |
| 312 | V | 1.450933 | 3.321314 |
| 313 | V | 1.464480 | 3.420855 |
| 314 | V | 1.483801 | 3.347318 |
| 315 | V | 1.484348 | 2.942604 |
| 316 | V | 1.484728 | 3.268098 |
| 317 | V | 1.488430 | 3.371331 |
| 318 | V | 1.500860 | 3.344499 |
| 319 | V | 1.506324 | 2.941733 |
| 320 | V | 1.511531 | 3.293799 |
| 321 | V | 1.527915 | 2.861771 |
| 322 | V | 1.535404 | 3.318010 |
| 323 | V | 1.545819 | 3.334555 |
| 324 | V | 1.558768 | 3.244788 |
| 325 | V | 1.565730 | 3.387682 |
| 326 | V | 1.584306 | 3.356304 |
| 327 | V | 1.587681 | 3.469361 |
| 328 | V | 1.594639 | 3.054360 |
| 329 | V | 1.600541 | 3.314609 |
| 330 | V | 1.611257 | 3.416485 |
| 331 | V | 1.615075 | 3.357515 |
| 332 | V | 1.620155 | 3.263547 |
| 333 | V | 1.628418 | 3.259886 |
| 334 | V | 1.629492 | 3.087188 |
| 335 | V | 1.641256 | 3.422638 |

|     |   |          |          |
|-----|---|----------|----------|
| 336 | V | 1.645984 | 3.076521 |
| 337 | V | 1.646323 | 3.476280 |
| 338 | V | 1.652563 | 3.441415 |
| 339 | V | 1.654495 | 3.282781 |
| 340 | V | 1.684874 | 3.504978 |
| 341 | V | 1.690528 | 3.039254 |
| 342 | V | 1.699026 | 3.399122 |
| 343 | V | 1.703171 | 3.446630 |
| 344 | V | 1.712997 | 3.503356 |
| 345 | V | 1.714481 | 3.085445 |
| 346 | V | 1.720850 | 3.031885 |
| 347 | V | 1.726385 | 3.369717 |
| 348 | V | 1.746623 | 3.602479 |
| 349 | V | 1.748321 | 3.076768 |
| 350 | V | 1.760624 | 3.428541 |
| 351 | V | 1.762250 | 3.229505 |
| 352 | V | 1.768394 | 3.527535 |
| 353 | V | 1.785220 | 3.598020 |
| 354 | V | 1.796797 | 3.318591 |
| 355 | V | 1.802163 | 3.526996 |
| 356 | V | 1.829078 | 3.815104 |
| 357 | V | 1.834571 | 3.674862 |
| 358 | V | 1.851404 | 3.348745 |
| 359 | V | 1.858375 | 3.669857 |
| 360 | V | 1.872440 | 3.755990 |
| 361 | V | 1.877654 | 3.842438 |
| 362 | V | 1.885980 | 3.374071 |
| 363 | V | 1.899142 | 3.435772 |
| 364 | V | 1.907276 | 3.774288 |
| 365 | V | 1.929825 | 3.895520 |
| 366 | V | 1.932846 | 3.478518 |
| 367 | V | 1.944127 | 3.501501 |
| 368 | V | 1.959054 | 3.869737 |
| 369 | V | 1.963059 | 3.486125 |
| 370 | V | 1.987555 | 3.498506 |
| 371 | V | 1.990799 | 3.897007 |
| 372 | V | 2.001097 | 3.532452 |
| 373 | V | 2.008033 | 3.884933 |
| 374 | V | 2.023331 | 3.529848 |
| 375 | V | 2.046516 | 3.603851 |
| 376 | V | 2.055835 | 3.478892 |
| 377 | V | 2.059205 | 3.781052 |
| 378 | V | 2.072949 | 3.594830 |
| 379 | V | 2.075587 | 3.567076 |
| 380 | V | 2.097000 | 3.506950 |
| 381 | V | 2.103873 | 3.916199 |
| 382 | V | 2.112123 | 3.738056 |
| 383 | V | 2.119889 | 3.915416 |
| 384 | V | 2.125070 | 3.308814 |
| 385 | V | 2.134861 | 3.558381 |

|     |   |          |          |
|-----|---|----------|----------|
| 386 | V | 2.139624 | 3.870996 |
| 387 | V | 2.141319 | 3.333785 |
| 388 | V | 2.148261 | 3.745265 |
| 389 | V | 2.149848 | 3.426544 |
| 390 | V | 2.165785 | 3.797225 |
| 391 | V | 2.168903 | 3.586244 |
| 392 | V | 2.182548 | 3.836377 |
| 393 | V | 2.193845 | 3.823913 |
| 394 | V | 2.195851 | 3.610354 |
| 395 | V | 2.204520 | 3.960740 |
| 396 | V | 2.211450 | 3.890605 |
| 397 | V | 2.235219 | 4.040740 |
| 398 | V | 2.237752 | 3.712802 |
| 399 | V | 2.249570 | 4.074399 |
| 400 | V | 2.260705 | 4.121660 |
| 401 | V | 2.278352 | 3.643613 |
| 402 | V | 2.280675 | 3.997298 |
| 403 | V | 2.290672 | 3.973885 |
| 404 | V | 2.296623 | 3.824456 |
| 405 | V | 2.298063 | 4.062025 |
| 406 | V | 2.300466 | 3.626800 |
| 407 | V | 2.323144 | 3.836255 |
| 408 | V | 2.324573 | 4.029598 |
| 409 | V | 2.329893 | 3.601325 |
| 410 | V | 2.353841 | 4.078473 |
| 411 | V | 2.363286 | 3.915319 |
| 412 | V | 2.367352 | 4.227506 |
| 413 | V | 2.376468 | 4.243804 |
| 414 | V | 2.388957 | 3.931328 |
| 415 | V | 2.405352 | 4.227063 |
| 416 | V | 2.409535 | 3.895009 |
| 417 | V | 2.416590 | 3.913806 |
| 418 | V | 2.416951 | 4.236401 |
| 419 | V | 2.437301 | 4.448044 |
| 420 | V | 2.446158 | 4.288233 |
| 421 | V | 2.461504 | 4.009117 |
| 422 | V | 2.468927 | 4.493573 |
| 423 | V | 2.478933 | 3.826680 |
| 424 | V | 2.483892 | 4.345222 |
| 425 | V | 2.488133 | 3.939432 |
| 426 | V | 2.497902 | 4.356936 |
| 427 | V | 2.516691 | 4.393880 |
| 428 | V | 2.532119 | 4.303417 |
| 429 | V | 2.570712 | 4.548313 |
| 430 | V | 2.582746 | 4.548540 |
| 431 | V | 2.588307 | 4.605174 |
| 432 | V | 2.607721 | 4.535335 |
| 433 | V | 2.619841 | 4.619023 |
| 434 | V | 2.646229 | 4.647994 |
| 435 | V | 2.672784 | 4.922550 |

|     |   |          |          |
|-----|---|----------|----------|
| 436 | V | 2.683817 | 4.591785 |
| 437 | V | 2.721855 | 4.759796 |
| 438 | V | 2.726216 | 4.797587 |
| 439 | V | 2.763859 | 4.743906 |
| 440 | V | 2.767585 | 4.619623 |
| 441 | V | 2.809802 | 4.769055 |
| 442 | V | 2.834225 | 4.806629 |
| 443 | V | 2.858290 | 4.876805 |
| 444 | V | 2.878829 | 5.069417 |
| 445 | V | 2.900607 | 4.891596 |
| 446 | V | 2.930872 | 4.940150 |
| 447 | V | 2.959460 | 4.786566 |
| 448 | V | 2.964330 | 4.895296 |
| 449 | V | 2.988735 | 4.847357 |
| 450 | V | 2.999135 | 4.842444 |
| 451 | V | 3.014369 | 5.019748 |
| 452 | V | 3.020663 | 5.054422 |
| 453 | V | 3.070085 | 5.023541 |
| 454 | V | 3.074902 | 5.144288 |
| 455 | V | 3.137957 | 5.099554 |
| 456 | V | 3.172772 | 5.201305 |
| 457 | V | 3.197607 | 5.209710 |
| 458 | V | 3.226209 | 5.259392 |
| 459 | V | 3.259210 | 5.354966 |
| 460 | V | 3.265188 | 5.273641 |
| 461 | V | 3.322002 | 5.550537 |
| 462 | V | 3.471353 | 5.539655 |
| 463 | V | 3.600906 | 5.634455 |
| 464 | V | 3.647962 | 5.649983 |
| 465 | V | 7.480087 | 3.567334 |

Total kinetic energy from orbitals= 1.292665684137D+03

9.3. (*E/Z*)-4-(2-((5-nitrofur-2-yl)methylene)hydrazineyl)-2-phenylquinazoline **3a** in complex with Cu(II)

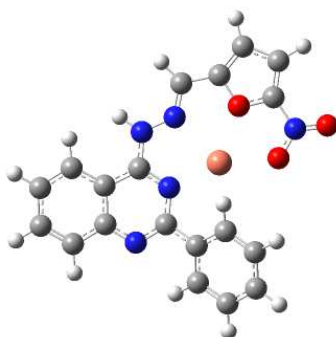

**Standard orientation:**

| Center<br>Number | Atomic<br>Number | Atomic<br>Type | Coordinates (Angstroms) |   |   |
|------------------|------------------|----------------|-------------------------|---|---|
|                  |                  |                | X                       | Y | Z |

|    |    |   |           |           |           |
|----|----|---|-----------|-----------|-----------|
| 1  | 6  | 0 | -4.959877 | -2.883396 | -0.096146 |
| 2  | 6  | 0 | -3.569798 | -2.795027 | -0.200751 |
| 3  | 6  | 0 | -2.939913 | -1.561811 | -0.078952 |
| 4  | 6  | 0 | -3.736828 | -0.392361 | 0.137010  |
| 5  | 6  | 0 | -5.149646 | -0.512949 | 0.266427  |
| 6  | 6  | 0 | -5.746329 | -1.746821 | 0.145566  |
| 7  | 1  | 0 | -5.435902 | -3.852876 | -0.197946 |
| 8  | 1  | 0 | -3.016876 | -3.710477 | -0.384183 |
| 9  | 6  | 0 | -1.512975 | -1.331016 | -0.102103 |
| 10 | 1  | 0 | -5.720425 | 0.392611  | 0.438070  |
| 11 | 1  | 0 | -6.822710 | -1.845648 | 0.230356  |
| 12 | 6  | 0 | -1.873326 | 0.950411  | 0.012973  |
| 13 | 7  | 0 | -3.193972 | 0.823571  | 0.204833  |
| 14 | 7  | 0 | -1.003172 | -0.099534 | -0.063898 |
| 15 | 7  | 0 | -0.665310 | -2.391447 | -0.145111 |
| 16 | 7  | 0 | 0.652773  | -2.142220 | -0.115364 |
| 17 | 6  | 0 | -1.380660 | 2.301026  | -0.110162 |
| 18 | 6  | 0 | -0.161007 | 2.599443  | -0.768699 |
| 19 | 6  | 0 | -2.148737 | 3.362086  | 0.439097  |
| 20 | 6  | 0 | 0.296727  | 3.894595  | -0.824044 |
| 21 | 1  | 0 | 0.373421  | 1.823948  | -1.310981 |
| 22 | 6  | 0 | -1.676330 | 4.656807  | 0.387669  |
| 23 | 1  | 0 | -3.088769 | 3.130091  | 0.922924  |
| 24 | 6  | 0 | -0.454309 | 4.926739  | -0.233016 |
| 25 | 1  | 0 | 1.220322  | 4.127352  | -1.341433 |
| 26 | 1  | 0 | -2.250555 | 5.462994  | 0.829509  |
| 27 | 1  | 0 | -0.086487 | 5.946842  | -0.277950 |
| 28 | 1  | 0 | -1.022987 | -3.340737 | -0.125867 |
| 29 | 6  | 0 | 1.567945  | -3.038772 | -0.134098 |
| 30 | 1  | 0 | 1.410764  | -4.116014 | -0.193830 |
| 31 | 6  | 0 | 2.908794  | -2.474746 | -0.056626 |
| 32 | 6  | 0 | 4.223618  | -2.856862 | -0.036008 |
| 33 | 8  | 0 | 2.845927  | -1.124414 | 0.033045  |
| 34 | 6  | 0 | 5.003877  | -1.659348 | 0.074073  |
| 35 | 1  | 0 | 4.609126  | -3.865246 | -0.091542 |
| 36 | 6  | 0 | 4.091113  | -0.652316 | 0.110570  |
| 37 | 1  | 0 | 6.079850  | -1.571968 | 0.119136  |
| 38 | 7  | 0 | 4.083763  | 0.774055  | 0.210308  |
| 39 | 8  | 0 | 2.955969  | 1.315634  | 0.212587  |
| 40 | 8  | 0 | 5.134810  | 1.355092  | 0.281511  |
| 41 | 29 | 0 | 1.049826  | 0.192537  | 0.101191  |

-----  
Rotational constants (GHZ): 0.2429866 0.1310050 0.0860669

Cycle 9 Pass 1 IDiag 1:

RMSU= 7.83D-09 CP: 1.00D+00 1.04D+00 9.27D-01 1.06D+00 8.00D-01

CP: 1.11D+00

E= -1230.50015307063 Delta-E= -0.00000000042 Rises=F Damp=F

DIIS: error= 4.32D-08 at cycle 7 NSaved= 7.

NSaved= 7 IEnMin= 7 EnMin= -1230.50015307063 IErMin= 7 ErrMin= 4.32D-08

ErrMax= 4.32D-08 0.00D+00 EMaxC= 1.00D-01 BMatC= 6.98D-12 BMatP= 2.50D-11  
 IDIUse=1 WtCom= 1.00D+00 WtEn= 0.00D+00  
 Coeff-Com: 0.773D-05 0.140D-02-0.501D-02-0.973D-01-0.633D-01 0.314D+00  
 Coeff-Com: 0.850D+00  
 Coeff: 0.773D-05 0.140D-02-0.501D-02-0.973D-01-0.633D-01 0.314D+00  
 Coeff: 0.850D+00  
 Gap= 0.204 Goal= None Shift= 0.000  
 Gap= 0.204 Goal= None Shift= 0.000  
 RMSDP=7.32D-09 MaxDP=4.70D-07 DE=-4.18D-11 OVMax= 1.11D-06  
  
 SCF Done: E(UCAM-B3LYP) = -1230.50015307 A.U. after 9 cycles  
 NFock= 9 Conv=0.73D-08 -V/T= 2.0064  
 <Sx>= 0.0000 <Sy>= 0.0000 <Sz>= 0.0000 <S\*\*2>= 0.0000 S= 0.0000  
 <L.S>= 0.000000000000E+00  
 KE= 1.222727256475D+03 PE=-7.370827779908D+03 EE= 2.666256415164D+03  
 Annihilation of the first spin contaminant:  
 S\*\*2 before annihilation 0.0000, after 0.0000  
 Leave Link 502 at Thu Sep 22 03:54:39 2022, MaxMem= 2147483648 cpu: 1906.5  
 (Enter /opt/gaussian/g09/l701.exe)  
 Compute integral first derivatives.  
 ... and contract with generalized density number 0.  
 Leave Link 701 at Thu Sep 22 03:54:39 2022, MaxMem= 2147483648 cpu: 4.5  
 (Enter /opt/gaussian/g09/l702.exe)  
 L702 exits ... SP integral derivatives will be done elsewhere.  
 Leave Link 702 at Thu Sep 22 03:54:39 2022, MaxMem= 2147483648 cpu: 0.5  
 (Enter /opt/gaussian/g09/l703.exe)  
 Compute integral first derivatives, UseDBF=F ICtDFT= 0.  
 Integral derivatives from FoFJK, PRISM(SPFD).  
 Calling FoFJK, ICntrl= 2127 FMM=F ISym2X=0 IICent= 0 IOpClX= 1 NMat=1  
 NMatS=1 NMatT=0.  
 FoFJK: IHMeth= 1 ICntrl= 2127 DoSepK=T KAlg= 0 IICent= 0 FoldK=F  
 IRaf= 1 NMat= 1 IRICut= 1 DoRegI=T DoRaff=F ISym2E= 0.  
 FoFCou: FMM=F IPFlag= 0 FMFlag= 100000 FMFlg1= 800  
 NFxFlg= 0 DoJE=F BraDBF=F KetDBF=F FulRan=T  
 wScrn= 0.000000 ICntrl= 2527 IOpCl= 0 IICent= 0 NGrid= 0  
 NMat0= 1 NMatS0= 1 NMatT0= 0 NMatD0= 1 NMtDS0= 0  
 NMtDT0= 0  
 Symmetry not used in FoFCou.  
 Leave Link 703 at Thu Sep 22 03:56:25 2022, MaxMem= 2147483648 cpu: 847.0  
 (Enter /opt/gaussian/g09/l716.exe)  
 Dipole =-2.20606259D-01-3.20457782D+00-2.62306603D-01  
 \*\*\*\*\* Axes restored to original set \*\*\*\*\*  
 Cartesian Forces: Max 0.048232877 RMS 0.011696893  
 Leave Link 716 at Thu Sep 22 03:56:26 2022, MaxMem= 2147483648 cpu: 1.0  
 (Enter /opt/gaussian/g09/l122.exe)  
 CPIOFr: IOpCl= 1 IRwI=-1 IRwCP= 731 ICalc= 4 LCPTot= 338287 Len1MO=  
 1090774 IndFrg= 5792157  
 Restoring MOs from calculation 1 to rwf.

CPIOFr: IOpCl= 1 IRwI=-2 IRwCP= 731 ICalc= 0 LCPTot= 338287 Len1MO=  
1090774 IndFrg= 1429061

Counterpoise corrected energy = -1426.063306408361

BSSE energy = 0.011530177425

sum of monomers = -1425.493130401567

complexation energy = -365.03 kcal/mole (raw)

**complexation energy = -357.79 kcal/mole (corrected)**

Leave Link 122 at Thu Sep 22 03:56:26 2022, MaxMem= 2147483648 cpu: 0.5

(Enter /opt/gaussian/g09/l716.exe)

Rotating derivatives to standard orientation.

Dipole =-2.04827069D+00-2.73171297D+00-1.95395818D-01

### Orbital energies and kinetic energies (alpha):

|    |   | 1          | 2         |
|----|---|------------|-----------|
| 1  | O | -19.558362 | 29.116819 |
| 2  | O | -19.497706 | 29.122489 |
| 3  | O | -19.493996 | 29.121956 |
| 4  | O | -14.893671 | 22.048957 |
| 5  | O | -14.759193 | 22.045778 |
| 6  | O | -14.722929 | 22.049514 |
| 7  | O | -14.693036 | 22.050236 |
| 8  | O | -14.677966 | 22.048057 |
| 9  | O | -10.638678 | 15.952994 |
| 10 | O | -10.609812 | 15.953424 |
| 11 | O | -10.605723 | 15.949837 |
| 12 | O | -10.583905 | 15.953681 |
| 13 | O | -10.583462 | 15.950153 |
| 14 | O | -10.565770 | 15.953740 |
| 15 | O | -10.547575 | 15.953106 |
| 16 | O | -10.534299 | 15.953736 |
| 17 | O | -10.527647 | 15.953999 |
| 18 | O | -10.527053 | 15.953050 |
| 19 | O | -10.525567 | 15.953599 |
| 20 | O | -10.520580 | 15.953268 |
| 21 | O | -10.519457 | 15.952416 |
| 22 | O | -10.509213 | 15.953163 |
| 23 | O | -10.508588 | 15.954357 |
| 24 | O | -10.506056 | 15.953536 |
| 25 | O | -10.503819 | 15.953384 |
| 26 | O | -10.493223 | 15.953478 |
| 27 | O | -10.484590 | 15.953688 |
| 28 | O | -4.581928  | 2.684574  |
| 29 | O | -3.096573  | 5.088141  |
| 30 | O | -3.090851  | 5.075689  |
| 31 | O | -3.089812  | 5.079120  |
| 32 | O | -1.558782  | 2.483329  |
| 33 | O | -1.484048  | 2.495621  |
| 34 | O | -1.403868  | 1.969347  |
| 35 | O | -1.376610  | 2.795062  |
| 36 | O | -1.341208  | 1.835449  |



|    |   |           |          |
|----|---|-----------|----------|
| 37 | O | -1.260382 | 2.005025 |
| 38 | O | -1.226512 | 1.794707 |
| 39 | O | -1.194584 | 1.725833 |
| 40 | O | -1.180853 | 1.519466 |
| 41 | O | -1.151883 | 1.993819 |
| 42 | O | -1.145437 | 1.800052 |
| 43 | O | -1.116373 | 1.700011 |
| 44 | O | -1.103128 | 1.629931 |
| 45 | O | -1.068160 | 1.624841 |
| 46 | O | -1.064496 | 1.677863 |
| 47 | O | -1.049423 | 1.917044 |
| 48 | O | -1.008009 | 1.693411 |
| 49 | O | -0.994281 | 1.853260 |
| 50 | O | -0.968164 | 1.739864 |
| 51 | O | -0.956664 | 1.511534 |
| 52 | O | -0.941507 | 1.810644 |
| 53 | O | -0.923508 | 1.595048 |
| 54 | O | -0.913783 | 1.509365 |
| 55 | O | -0.900884 | 1.762402 |
| 56 | O | -0.892573 | 1.800403 |
| 57 | O | -0.877080 | 1.970107 |
| 58 | O | -0.871374 | 1.699290 |
| 59 | O | -0.859009 | 1.686414 |
| 60 | O | -0.856797 | 1.639730 |
| 61 | O | -0.844306 | 1.527153 |
| 62 | O | -0.828771 | 1.354331 |
| 63 | O | -0.815820 | 2.376890 |
| 64 | O | -0.809790 | 1.332217 |
| 65 | O | -0.800468 | 1.757854 |
| 66 | O | -0.792769 | 1.659387 |
| 67 | O | -0.787359 | 1.552416 |
| 68 | O | -0.778587 | 1.409924 |
| 69 | O | -0.764743 | 1.461628 |
| 70 | O | -0.757886 | 1.387691 |
| 71 | O | -0.753152 | 1.369993 |
| 72 | O | -0.744747 | 1.480305 |
| 73 | O | -0.740048 | 1.920613 |
| 74 | O | -0.735558 | 1.484232 |
| 75 | O | -0.730942 | 1.399316 |
| 76 | O | -0.726882 | 1.629333 |
| 77 | O | -0.722442 | 1.246935 |
| 78 | O | -0.704827 | 1.615884 |
| 79 | O | -0.695386 | 1.243561 |
| 80 | O | -0.678878 | 1.385933 |
| 81 | O | -0.675180 | 1.474424 |
| 82 | O | -0.667843 | 1.750778 |
| 83 | O | -0.662489 | 1.198579 |
| 84 | O | -0.649355 | 2.199920 |
| 85 | O | -0.645636 | 2.142742 |
| 86 | O | -0.638151 | 1.455016 |

|     |   |           |          |
|-----|---|-----------|----------|
| 87  | O | -0.626246 | 2.727715 |
| 88  | O | -0.618217 | 2.662669 |
| 89  | O | -0.609760 | 1.815272 |
| 90  | O | -0.605941 | 2.787793 |
| 91  | O | -0.598257 | 1.918953 |
| 92  | O | -0.593434 | 2.326511 |
| 93  | O | -0.581246 | 1.557107 |
| 94  | O | -0.568475 | 4.129396 |
| 95  | O | -0.564761 | 8.462917 |
| 96  | O | -0.563658 | 8.573294 |
| 97  | O | -0.555433 | 5.247079 |
| 98  | O | -0.549268 | 4.527298 |
| 99  | O | -0.542644 | 6.307067 |
| 100 | O | -0.533975 | 2.128390 |
| 101 | O | -0.523836 | 5.787960 |
| 102 | O | -0.516617 | 2.377482 |
| 103 | V | -0.299542 | 1.829929 |
| 104 | V | -0.275848 | 1.699993 |
| 105 | V | -0.256205 | 1.834881 |
| 106 | V | -0.224050 | 1.875226 |
| 107 | V | -0.195786 | 1.474895 |
| 108 | V | -0.192598 | 1.546846 |
| 109 | V | -0.172834 | 1.384539 |
| 110 | V | -0.168520 | 1.631441 |
| 111 | V | -0.165671 | 0.560364 |
| 112 | V | -0.148670 | 0.745865 |
| 113 | V | -0.141237 | 0.370019 |
| 114 | V | -0.126020 | 2.007885 |
| 115 | V | -0.117380 | 0.885057 |
| 116 | V | -0.109456 | 1.674417 |
| 117 | V | -0.093225 | 1.703982 |
| 118 | V | -0.079126 | 1.560597 |
| 119 | V | -0.072503 | 0.681037 |
| 120 | V | -0.060736 | 1.276383 |
| 121 | V | -0.051948 | 1.938938 |
| 122 | V | -0.043883 | 1.224135 |
| 123 | V | -0.042686 | 1.265498 |
| 124 | V | -0.028776 | 1.375419 |
| 125 | V | -0.021464 | 1.611656 |
| 126 | V | -0.008207 | 1.785117 |
| 127 | V | -0.006336 | 1.684308 |
| 128 | V | -0.000751 | 1.468621 |
| 129 | V | 0.007228  | 1.536336 |
| 130 | V | 0.010381  | 1.255641 |
| 131 | V | 0.014538  | 1.591077 |
| 132 | V | 0.018283  | 1.468177 |
| 133 | V | 0.021202  | 1.835400 |
| 134 | V | 0.031308  | 1.670448 |
| 135 | V | 0.033922  | 1.510470 |
| 136 | V | 0.044568  | 2.276782 |

|     |   |          |          |
|-----|---|----------|----------|
| 137 | V | 0.054653 | 1.917886 |
| 138 | V | 0.055357 | 1.534711 |
| 139 | V | 0.065302 | 1.528400 |
| 140 | V | 0.069860 | 1.905713 |
| 141 | V | 0.076695 | 2.083864 |
| 142 | V | 0.086452 | 2.026008 |
| 143 | V | 0.097816 | 2.181545 |
| 144 | V | 0.105242 | 1.883073 |
| 145 | V | 0.115211 | 1.958335 |
| 146 | V | 0.128155 | 2.720722 |
| 147 | V | 0.137197 | 1.488821 |
| 148 | V | 0.140947 | 2.166943 |
| 149 | V | 0.147275 | 1.708026 |
| 150 | V | 0.159536 | 1.865239 |
| 151 | V | 0.166582 | 1.899630 |
| 152 | V | 0.173313 | 2.173602 |
| 153 | V | 0.183662 | 2.219715 |
| 154 | V | 0.188478 | 2.274296 |
| 155 | V | 0.204268 | 1.761499 |
| 156 | V | 0.212044 | 2.386365 |
| 157 | V | 0.231322 | 2.302668 |
| 158 | V | 0.235544 | 2.394484 |
| 159 | V | 0.255859 | 2.301768 |
| 160 | V | 0.285352 | 1.998559 |
| 161 | V | 0.298122 | 2.054375 |
| 162 | V | 0.308975 | 2.016394 |
| 163 | V | 0.327735 | 2.723681 |
| 164 | V | 0.331113 | 2.129122 |
| 165 | V | 0.336088 | 2.150194 |
| 166 | V | 0.337348 | 2.173153 |
| 167 | V | 0.347147 | 2.085663 |
| 168 | V | 0.353703 | 2.126192 |
| 169 | V | 0.357355 | 2.178093 |
| 170 | V | 0.360360 | 2.212194 |
| 171 | V | 0.364564 | 2.123016 |
| 172 | V | 0.367216 | 2.158498 |
| 173 | V | 0.375754 | 2.221358 |
| 174 | V | 0.379726 | 2.462859 |
| 175 | V | 0.384722 | 2.091374 |
| 176 | V | 0.390644 | 2.448789 |
| 177 | V | 0.398073 | 2.476416 |
| 178 | V | 0.402611 | 2.290804 |
| 179 | V | 0.409689 | 2.492143 |
| 180 | V | 0.413353 | 2.424983 |
| 181 | V | 0.418774 | 2.214189 |
| 182 | V | 0.421120 | 2.278618 |
| 183 | V | 0.424546 | 2.208071 |
| 184 | V | 0.427854 | 2.401293 |
| 185 | V | 0.429394 | 2.512322 |
| 186 | V | 0.436457 | 2.185001 |

|     |   |          |          |
|-----|---|----------|----------|
| 187 | V | 0.437754 | 2.182949 |
| 188 | V | 0.443168 | 2.099165 |
| 189 | V | 0.445152 | 2.335985 |
| 190 | V | 0.453396 | 2.303911 |
| 191 | V | 0.456973 | 2.311575 |
| 192 | V | 0.459160 | 2.167435 |
| 193 | V | 0.460357 | 2.208974 |
| 194 | V | 0.470509 | 2.385442 |
| 195 | V | 0.474388 | 2.470501 |
| 196 | V | 0.480965 | 2.404841 |
| 197 | V | 0.482263 | 2.495641 |
| 198 | V | 0.493644 | 2.562844 |
| 199 | V | 0.508873 | 2.302782 |
| 200 | V | 0.513288 | 2.462416 |
| 201 | V | 0.525186 | 2.224954 |
| 202 | V | 0.535148 | 2.598412 |
| 203 | V | 0.552263 | 2.487231 |
| 204 | V | 0.557049 | 2.626564 |
| 205 | V | 0.566844 | 2.721527 |
| 206 | V | 0.577606 | 2.522166 |
| 207 | V | 0.585376 | 2.927734 |
| 208 | V | 0.589202 | 2.738175 |
| 209 | V | 0.602808 | 2.693289 |
| 210 | V | 0.607291 | 2.537227 |
| 211 | V | 0.617689 | 2.587770 |
| 212 | V | 0.619374 | 2.492958 |
| 213 | V | 0.631425 | 2.583353 |
| 214 | V | 0.641863 | 2.538666 |
| 215 | V | 0.646305 | 2.619573 |
| 216 | V | 0.650738 | 2.678820 |
| 217 | V | 0.652357 | 2.560191 |
| 218 | V | 0.659332 | 2.556326 |
| 219 | V | 0.665347 | 2.682151 |
| 220 | V | 0.666636 | 2.745746 |
| 221 | V | 0.672690 | 2.847478 |
| 222 | V | 0.679677 | 2.756599 |
| 223 | V | 0.682032 | 2.762258 |
| 224 | V | 0.689155 | 2.744080 |
| 225 | V | 0.696846 | 2.642558 |
| 226 | V | 0.700336 | 2.646234 |
| 227 | V | 0.717841 | 2.631779 |
| 228 | V | 0.722740 | 2.670364 |
| 229 | V | 0.729769 | 2.656592 |
| 230 | V | 0.734302 | 2.525378 |
| 231 | V | 0.743875 | 2.956600 |
| 232 | V | 0.751268 | 2.757378 |
| 233 | V | 0.762658 | 2.788515 |
| 234 | V | 0.768673 | 2.654329 |
| 235 | V | 0.772610 | 2.709661 |
| 236 | V | 0.775964 | 2.714330 |

|     |   |          |          |
|-----|---|----------|----------|
| 237 | V | 0.791106 | 2.851731 |
| 238 | V | 0.796065 | 2.780647 |
| 239 | V | 0.798499 | 3.157855 |
| 240 | V | 0.809554 | 2.949970 |
| 241 | V | 0.822070 | 2.831884 |
| 242 | V | 0.827799 | 2.714234 |
| 243 | V | 0.832309 | 2.946835 |
| 244 | V | 0.838412 | 2.962903 |
| 245 | V | 0.848935 | 2.821650 |
| 246 | V | 0.856629 | 2.446577 |
| 247 | V | 0.861902 | 2.593586 |
| 248 | V | 0.868866 | 2.609901 |
| 249 | V | 0.881327 | 3.142021 |
| 250 | V | 0.899225 | 2.733977 |
| 251 | V | 0.903207 | 2.468872 |
| 252 | V | 0.907560 | 2.653577 |
| 253 | V | 0.912995 | 3.051759 |
| 254 | V | 0.922178 | 2.793905 |
| 255 | V | 0.930093 | 3.134190 |
| 256 | V | 0.946667 | 2.799761 |
| 257 | V | 0.952548 | 2.517143 |
| 258 | V | 0.968556 | 2.611268 |
| 259 | V | 0.985510 | 2.543442 |
| 260 | V | 0.987369 | 2.684193 |
| 261 | V | 1.004667 | 2.659392 |
| 262 | V | 1.016038 | 2.599105 |
| 263 | V | 1.030619 | 2.523900 |
| 264 | V | 1.040793 | 2.480743 |
| 265 | V | 1.049448 | 2.689278 |
| 266 | V | 1.058533 | 2.624699 |
| 267 | V | 1.063979 | 2.555479 |
| 268 | V | 1.076437 | 2.695534 |
| 269 | V | 1.078721 | 2.700906 |
| 270 | V | 1.089335 | 2.646745 |
| 271 | V | 1.094517 | 2.684841 |
| 272 | V | 1.114383 | 2.726379 |
| 273 | V | 1.118336 | 2.547427 |
| 274 | V | 1.128900 | 2.623599 |
| 275 | V | 1.129927 | 2.621459 |
| 276 | V | 1.140823 | 2.594761 |
| 277 | V | 1.155929 | 2.658281 |
| 278 | V | 1.161822 | 2.587108 |
| 279 | V | 1.165333 | 2.616530 |
| 280 | V | 1.171077 | 2.566025 |
| 281 | V | 1.175954 | 2.601942 |
| 282 | V | 1.182652 | 2.572450 |
| 283 | V | 1.184236 | 2.631530 |
| 284 | V | 1.215913 | 2.613555 |
| 285 | V | 1.224105 | 2.609069 |
| 286 | V | 1.227606 | 2.682290 |

|     |   |          |          |
|-----|---|----------|----------|
| 287 | V | 1.234886 | 2.590020 |
| 288 | V | 1.244847 | 2.635254 |
| 289 | V | 1.249214 | 2.733151 |
| 290 | V | 1.257069 | 2.658597 |
| 291 | V | 1.263694 | 2.776237 |
| 292 | V | 1.275126 | 2.933698 |
| 293 | V | 1.278022 | 2.776553 |
| 294 | V | 1.288418 | 2.732235 |
| 295 | V | 1.292137 | 2.732991 |
| 296 | V | 1.308894 | 2.792629 |
| 297 | V | 1.331870 | 2.738746 |
| 298 | V | 1.337157 | 2.776783 |
| 299 | V | 1.349607 | 2.835916 |
| 300 | V | 1.377710 | 2.930253 |
| 301 | V | 1.392991 | 2.980273 |
| 302 | V | 1.402000 | 2.936462 |
| 303 | V | 1.440136 | 2.995528 |
| 304 | V | 1.459123 | 2.938692 |
| 305 | V | 1.468371 | 3.054519 |
| 306 | V | 1.489387 | 3.243280 |
| 307 | V | 1.512421 | 3.275323 |
| 308 | V | 1.545419 | 2.877629 |
| 309 | V | 1.555674 | 3.519114 |
| 310 | V | 1.562987 | 3.164092 |
| 311 | V | 1.567507 | 3.151636 |
| 312 | V | 1.570413 | 3.245351 |
| 313 | V | 1.582089 | 3.183085 |
| 314 | V | 1.597224 | 3.131763 |
| 315 | V | 1.609322 | 3.269231 |
| 316 | V | 1.616979 | 3.238155 |
| 317 | V | 1.629848 | 3.561289 |
| 318 | V | 1.642782 | 3.142609 |
| 319 | V | 1.645826 | 3.097954 |
| 320 | V | 1.647744 | 3.255708 |
| 321 | V | 1.653035 | 3.349434 |
| 322 | V | 1.660654 | 3.433661 |
| 323 | V | 1.663681 | 2.965689 |
| 324 | V | 1.673823 | 3.115189 |
| 325 | V | 1.689341 | 3.241950 |
| 326 | V | 1.703681 | 3.267210 |
| 327 | V | 1.716606 | 3.195832 |
| 328 | V | 1.722274 | 3.174983 |
| 329 | V | 1.730208 | 3.306468 |
| 330 | V | 1.733699 | 3.201123 |
| 331 | V | 1.737971 | 3.263949 |
| 332 | V | 1.743159 | 3.442186 |
| 333 | V | 1.750125 | 3.336952 |
| 334 | V | 1.751822 | 3.176283 |
| 335 | V | 1.758118 | 3.515248 |
| 336 | V | 1.767858 | 3.273955 |

|     |   |          |          |
|-----|---|----------|----------|
| 337 | V | 1.774983 | 3.405170 |
| 338 | V | 1.778831 | 3.375580 |
| 339 | V | 1.785576 | 3.357704 |
| 340 | V | 1.788924 | 3.567063 |
| 341 | V | 1.794703 | 3.367295 |
| 342 | V | 1.821752 | 3.341255 |
| 343 | V | 1.823942 | 3.045685 |
| 344 | V | 1.830700 | 3.269515 |
| 345 | V | 1.838320 | 3.396266 |
| 346 | V | 1.838878 | 3.493029 |
| 347 | V | 1.841836 | 3.097014 |
| 348 | V | 1.869538 | 3.454565 |
| 349 | V | 1.879551 | 3.455450 |
| 350 | V | 1.886565 | 3.428343 |
| 351 | V | 1.898529 | 3.307935 |
| 352 | V | 1.907133 | 3.239829 |
| 353 | V | 1.908041 | 3.597359 |
| 354 | V | 1.921438 | 3.485892 |
| 355 | V | 1.922363 | 3.676680 |
| 356 | V | 1.958368 | 3.687691 |
| 357 | V | 1.959576 | 3.389038 |
| 358 | V | 1.964471 | 3.650355 |
| 359 | V | 1.992306 | 3.633804 |
| 360 | V | 1.999912 | 3.942438 |
| 361 | V | 2.011726 | 3.395769 |
| 362 | V | 2.016012 | 3.381273 |
| 363 | V | 2.029414 | 3.561899 |
| 364 | V | 2.044899 | 3.651123 |
| 365 | V | 2.068554 | 3.789550 |
| 366 | V | 2.076692 | 3.733945 |
| 367 | V | 2.083877 | 3.532156 |
| 368 | V | 2.096575 | 3.537926 |
| 369 | V | 2.100679 | 3.682526 |
| 370 | V | 2.114460 | 3.559408 |
| 371 | V | 2.122007 | 3.878622 |
| 372 | V | 2.130634 | 3.598212 |
| 373 | V | 2.140982 | 3.684270 |
| 374 | V | 2.146622 | 3.731092 |
| 375 | V | 2.157024 | 3.554561 |
| 376 | V | 2.176323 | 3.700375 |
| 377 | V | 2.183968 | 3.709858 |
| 378 | V | 2.188200 | 3.540896 |
| 379 | V | 2.206612 | 3.493379 |
| 380 | V | 2.217259 | 3.886308 |
| 381 | V | 2.222171 | 3.631896 |
| 382 | V | 2.228857 | 3.406860 |
| 383 | V | 2.232997 | 3.554985 |
| 384 | V | 2.241656 | 3.582409 |
| 385 | V | 2.248227 | 3.493621 |
| 386 | V | 2.261451 | 3.623856 |

|     |   |          |          |
|-----|---|----------|----------|
| 387 | V | 2.265332 | 3.578499 |
| 388 | V | 2.271513 | 3.955524 |
| 389 | V | 2.274618 | 3.454677 |
| 390 | V | 2.288304 | 3.833393 |
| 391 | V | 2.293372 | 3.670600 |
| 392 | V | 2.298058 | 3.684312 |
| 393 | V | 2.300837 | 3.744912 |
| 394 | V | 2.315158 | 3.838248 |
| 395 | V | 2.331721 | 3.903023 |
| 396 | V | 2.335880 | 3.878765 |
| 397 | V | 2.346762 | 3.891232 |
| 398 | V | 2.355650 | 4.026828 |
| 399 | V | 2.376029 | 3.828002 |
| 400 | V | 2.378295 | 3.972810 |
| 401 | V | 2.381086 | 4.129356 |
| 402 | V | 2.391075 | 3.939156 |
| 403 | V | 2.398283 | 3.654813 |
| 404 | V | 2.413308 | 3.726250 |
| 405 | V | 2.417761 | 3.882699 |
| 406 | V | 2.433024 | 4.017614 |
| 407 | V | 2.440086 | 3.853355 |
| 408 | V | 2.457019 | 3.909552 |
| 409 | V | 2.457872 | 3.718983 |
| 410 | V | 2.472393 | 3.856465 |
| 411 | V | 2.482083 | 4.199173 |
| 412 | V | 2.493900 | 3.968000 |
| 413 | V | 2.506597 | 4.187193 |
| 414 | V | 2.510237 | 4.054480 |
| 415 | V | 2.528360 | 4.257609 |
| 416 | V | 2.531588 | 3.960533 |
| 417 | V | 2.542054 | 3.910185 |
| 418 | V | 2.542909 | 4.330781 |
| 419 | V | 2.550782 | 4.309456 |
| 420 | V | 2.561212 | 4.182201 |
| 421 | V | 2.576657 | 4.371824 |
| 422 | V | 2.589898 | 3.980518 |
| 423 | V | 2.596744 | 4.006453 |
| 424 | V | 2.613480 | 4.020793 |
| 425 | V | 2.617524 | 4.370168 |
| 426 | V | 2.626292 | 4.304739 |
| 427 | V | 2.631738 | 4.234443 |
| 428 | V | 2.666821 | 4.352910 |
| 429 | V | 2.678126 | 4.560544 |
| 430 | V | 2.701892 | 4.583788 |
| 431 | V | 2.720964 | 4.533189 |
| 432 | V | 2.738037 | 4.531982 |
| 433 | V | 2.740284 | 4.594983 |
| 434 | V | 2.752984 | 4.687800 |
| 435 | V | 2.758989 | 4.649304 |
| 436 | V | 2.804543 | 4.845905 |



|     |   |          |          |
|-----|---|----------|----------|
| 437 | V | 2.811735 | 4.584025 |
| 438 | V | 2.840783 | 4.583232 |
| 439 | V | 2.878841 | 4.748810 |
| 440 | V | 2.895978 | 4.701641 |
| 441 | V | 2.910625 | 4.495807 |
| 442 | V | 2.919615 | 4.784803 |
| 443 | V | 2.970421 | 4.839321 |
| 444 | V | 2.992029 | 4.945835 |
| 445 | V | 3.008367 | 4.890455 |
| 446 | V | 3.019703 | 4.909222 |
| 447 | V | 3.040302 | 4.941240 |
| 448 | V | 3.070426 | 4.793515 |
| 449 | V | 3.076787 | 4.943210 |
| 450 | V | 3.092779 | 4.847021 |
| 451 | V | 3.107782 | 4.846842 |
| 452 | V | 3.119007 | 4.870057 |
| 453 | V | 3.163819 | 5.206434 |
| 454 | V | 3.179490 | 5.037662 |
| 455 | V | 3.225585 | 5.214199 |
| 456 | V | 3.259351 | 5.103321 |
| 457 | V | 3.265214 | 5.114400 |
| 458 | V | 3.312002 | 5.200527 |
| 459 | V | 3.333223 | 5.299795 |
| 460 | V | 3.389522 | 5.229983 |
| 461 | V | 3.409836 | 5.444970 |
| 462 | V | 3.487838 | 5.526783 |
| 463 | V | 3.612637 | 5.554127 |
| 464 | V | 3.713829 | 5.643662 |
| 465 | V | 3.777205 | 5.661245 |

**Orbital energies and kinetic energies (beta):**

|    |   | 1          | 2         |
|----|---|------------|-----------|
| 1  | O | -19.558342 | 29.116836 |
| 2  | O | -19.497574 | 29.122597 |
| 3  | O | -19.493967 | 29.121978 |
| 4  | O | -14.893719 | 22.048922 |
| 5  | O | -14.758079 | 22.046673 |
| 6  | O | -14.723368 | 22.049156 |
| 7  | O | -14.693260 | 22.050054 |
| 8  | O | -14.672352 | 22.052711 |
| 9  | O | -10.638729 | 15.952988 |
| 10 | O | -10.610208 | 15.953157 |
| 11 | O | -10.605464 | 15.950051 |
| 12 | O | -10.583721 | 15.953767 |
| 13 | O | -10.583324 | 15.950350 |
| 14 | O | -10.566731 | 15.953016 |
| 15 | O | -10.545954 | 15.954494 |
| 16 | O | -10.534658 | 15.953469 |
| 17 | O | -10.525882 | 15.955548 |
| 18 | O | -10.525706 | 15.953477 |

|    |   |            |           |
|----|---|------------|-----------|
| 19 | O | -10.523777 | 15.955906 |
| 20 | O | -10.520307 | 15.953509 |
| 21 | O | -10.516135 | 15.955303 |
| 22 | O | -10.510429 | 15.952808 |
| 23 | O | -10.508639 | 15.953691 |
| 24 | O | -10.503221 | 15.956027 |
| 25 | O | -10.502324 | 15.954700 |
| 26 | O | -10.493427 | 15.953336 |
| 27 | O | -10.485522 | 15.952925 |
| 28 | O | -4.581250  | 2.684528  |
| 29 | O | -3.096323  | 5.088194  |
| 30 | O | -3.089893  | 5.075616  |
| 31 | O | -3.088841  | 5.078924  |
| 32 | O | -1.558702  | 2.483247  |
| 33 | O | -1.483976  | 2.495646  |
| 34 | O | -1.402898  | 1.968957  |
| 35 | O | -1.376470  | 2.794786  |
| 36 | O | -1.337143  | 1.831008  |
| 37 | O | -1.256052  | 1.985869  |
| 38 | O | -1.224814  | 1.804468  |
| 39 | O | -1.190718  | 1.714531  |
| 40 | O | -1.176197  | 1.524873  |
| 41 | O | -1.151368  | 1.988384  |
| 42 | O | -1.145042  | 1.807603  |
| 43 | O | -1.113637  | 1.697831  |
| 44 | O | -1.099883  | 1.624762  |
| 45 | O | -1.066125  | 1.601951  |
| 46 | O | -1.058157  | 1.744840  |
| 47 | O | -1.047523  | 1.875861  |
| 48 | O | -1.004903  | 1.701915  |
| 49 | O | -0.993562  | 1.837279  |
| 50 | O | -0.966373  | 1.737137  |
| 51 | O | -0.954955  | 1.518769  |
| 52 | O | -0.940657  | 1.809807  |
| 53 | O | -0.921047  | 1.581491  |
| 54 | O | -0.911868  | 1.510275  |
| 55 | O | -0.899773  | 1.771158  |
| 56 | O | -0.892152  | 1.815538  |
| 57 | O | -0.876248  | 1.949655  |
| 58 | O | -0.870490  | 1.695161  |
| 59 | O | -0.858697  | 1.687815  |
| 60 | O | -0.855790  | 1.629317  |
| 61 | O | -0.842051  | 1.515436  |
| 62 | O | -0.827380  | 1.378712  |
| 63 | O | -0.815568  | 2.366174  |
| 64 | O | -0.806980  | 1.382621  |
| 65 | O | -0.800023  | 1.763203  |
| 66 | O | -0.790922  | 1.634998  |
| 67 | O | -0.785737  | 1.543720  |
| 68 | O | -0.777538  | 1.407061  |

|     |   |           |          |
|-----|---|-----------|----------|
| 69  | O | -0.762509 | 1.457222 |
| 70  | O | -0.754175 | 1.350205 |
| 71  | O | -0.749905 | 1.417442 |
| 72  | O | -0.740516 | 1.741333 |
| 73  | O | -0.739219 | 1.622086 |
| 74  | O | -0.735346 | 1.480129 |
| 75  | O | -0.729825 | 1.407023 |
| 76  | O | -0.726454 | 1.618452 |
| 77  | O | -0.721623 | 1.253981 |
| 78  | O | -0.702273 | 1.746151 |
| 79  | O | -0.685258 | 1.126006 |
| 80  | O | -0.674234 | 1.470831 |
| 81  | O | -0.670980 | 1.332474 |
| 82  | O | -0.666140 | 1.755990 |
| 83  | O | -0.649016 | 2.066140 |
| 84  | O | -0.648228 | 2.048143 |
| 85  | O | -0.638673 | 1.445026 |
| 86  | O | -0.636573 | 1.462858 |
| 87  | O | -0.625698 | 2.708516 |
| 88  | O | -0.616529 | 2.692563 |
| 89  | O | -0.605642 | 2.769080 |
| 90  | O | -0.602524 | 1.962085 |
| 91  | O | -0.595796 | 1.845624 |
| 92  | O | -0.585500 | 2.318340 |
| 93  | O | -0.573856 | 2.074987 |
| 94  | O | -0.564095 | 8.493694 |
| 95  | O | -0.563485 | 8.723778 |
| 96  | O | -0.559329 | 7.172185 |
| 97  | O | -0.548381 | 4.943163 |
| 98  | O | -0.542050 | 6.132481 |
| 99  | O | -0.537600 | 1.365971 |
| 100 | O | -0.521626 | 5.982292 |
| 101 | O | -0.516346 | 2.520242 |
| 102 | V | -0.389379 | 1.452316 |
| 103 | V | -0.295774 | 1.926029 |
| 104 | V | -0.258962 | 1.712196 |
| 105 | V | -0.251853 | 1.747864 |
| 106 | V | -0.219727 | 1.858629 |
| 107 | V | -0.190399 | 1.515518 |
| 108 | V | -0.175983 | 1.515395 |
| 109 | V | -0.168749 | 1.238526 |
| 110 | V | -0.165136 | 0.656341 |
| 111 | V | -0.157010 | 1.598324 |
| 112 | V | -0.148281 | 0.766074 |
| 113 | V | -0.140920 | 0.381868 |
| 114 | V | -0.124671 | 2.027400 |
| 115 | V | -0.116808 | 0.845958 |
| 116 | V | -0.101723 | 1.631474 |
| 117 | V | -0.091851 | 1.709362 |
| 118 | V | -0.078696 | 1.560337 |

|     |   |           |          |
|-----|---|-----------|----------|
| 119 | V | -0.071844 | 0.719050 |
| 120 | V | -0.059768 | 1.298053 |
| 121 | V | -0.051341 | 1.928243 |
| 122 | V | -0.042925 | 1.272951 |
| 123 | V | -0.042142 | 1.182435 |
| 124 | V | -0.027630 | 1.376556 |
| 125 | V | -0.016329 | 1.613734 |
| 126 | V | -0.006694 | 1.734353 |
| 127 | V | -0.003575 | 1.656778 |
| 128 | V | 0.001213  | 1.368435 |
| 129 | V | 0.009732  | 1.456106 |
| 130 | V | 0.011283  | 1.509856 |
| 131 | V | 0.016228  | 1.600790 |
| 132 | V | 0.019755  | 1.446519 |
| 133 | V | 0.023165  | 1.783189 |
| 134 | V | 0.032484  | 1.647356 |
| 135 | V | 0.036120  | 1.556640 |
| 136 | V | 0.045200  | 2.280995 |
| 137 | V | 0.055639  | 1.891159 |
| 138 | V | 0.056522  | 1.556622 |
| 139 | V | 0.066362  | 1.524324 |
| 140 | V | 0.070833  | 1.911710 |
| 141 | V | 0.078333  | 2.049887 |
| 142 | V | 0.088728  | 2.073289 |
| 143 | V | 0.099070  | 2.199205 |
| 144 | V | 0.106965  | 1.865398 |
| 145 | V | 0.116965  | 1.957630 |
| 146 | V | 0.128409  | 2.723940 |
| 147 | V | 0.137931  | 1.486283 |
| 148 | V | 0.142130  | 2.152005 |
| 149 | V | 0.148195  | 1.702977 |
| 150 | V | 0.160212  | 1.868278 |
| 151 | V | 0.167454  | 1.894083 |
| 152 | V | 0.174992  | 2.182563 |
| 153 | V | 0.184541  | 2.258643 |
| 154 | V | 0.189171  | 2.230367 |
| 155 | V | 0.205269  | 1.760856 |
| 156 | V | 0.213050  | 2.385072 |
| 157 | V | 0.232107  | 2.271174 |
| 158 | V | 0.236872  | 2.424322 |
| 159 | V | 0.256329  | 2.299155 |
| 160 | V | 0.285983  | 1.998880 |
| 161 | V | 0.299313  | 2.053410 |
| 162 | V | 0.310110  | 2.018805 |
| 163 | V | 0.330533  | 2.714526 |
| 164 | V | 0.332186  | 2.167125 |
| 165 | V | 0.337609  | 2.196684 |
| 166 | V | 0.339028  | 2.120992 |
| 167 | V | 0.349186  | 2.096133 |
| 168 | V | 0.354689  | 2.120921 |

|     |   |          |          |
|-----|---|----------|----------|
| 169 | V | 0.358608 | 2.199041 |
| 170 | V | 0.363601 | 2.258764 |
| 171 | V | 0.367482 | 2.075196 |
| 172 | V | 0.369854 | 2.151948 |
| 173 | V | 0.377440 | 2.215110 |
| 174 | V | 0.380671 | 2.481873 |
| 175 | V | 0.387069 | 2.114752 |
| 176 | V | 0.391963 | 2.449274 |
| 177 | V | 0.399612 | 2.454507 |
| 178 | V | 0.404173 | 2.330228 |
| 179 | V | 0.412021 | 2.489399 |
| 180 | V | 0.416038 | 2.533182 |
| 181 | V | 0.421795 | 2.247679 |
| 182 | V | 0.425473 | 2.227722 |
| 183 | V | 0.426413 | 2.238929 |
| 184 | V | 0.428687 | 2.613600 |
| 185 | V | 0.431519 | 2.274943 |
| 186 | V | 0.437320 | 2.135569 |
| 187 | V | 0.439849 | 2.230431 |
| 188 | V | 0.444496 | 2.007831 |
| 189 | V | 0.447221 | 2.387949 |
| 190 | V | 0.455328 | 2.291544 |
| 191 | V | 0.459319 | 2.270975 |
| 192 | V | 0.459921 | 2.183267 |
| 193 | V | 0.464016 | 2.244217 |
| 194 | V | 0.471863 | 2.402958 |
| 195 | V | 0.476330 | 2.470826 |
| 196 | V | 0.481984 | 2.493930 |
| 197 | V | 0.485009 | 2.401611 |
| 198 | V | 0.496029 | 2.619912 |
| 199 | V | 0.510676 | 2.349775 |
| 200 | V | 0.516296 | 2.469049 |
| 201 | V | 0.527848 | 2.234152 |
| 202 | V | 0.537705 | 2.581971 |
| 203 | V | 0.553428 | 2.535892 |
| 204 | V | 0.559320 | 2.631977 |
| 205 | V | 0.569242 | 2.668191 |
| 206 | V | 0.579914 | 2.530932 |
| 207 | V | 0.585748 | 2.952284 |
| 208 | V | 0.589883 | 2.738449 |
| 209 | V | 0.603324 | 2.698178 |
| 210 | V | 0.608507 | 2.526417 |
| 211 | V | 0.619276 | 2.591843 |
| 212 | V | 0.622320 | 2.512631 |
| 213 | V | 0.632043 | 2.572155 |
| 214 | V | 0.643179 | 2.539033 |
| 215 | V | 0.646981 | 2.633800 |
| 216 | V | 0.652032 | 2.693088 |
| 217 | V | 0.653759 | 2.544386 |
| 218 | V | 0.660061 | 2.540436 |

|     |   |          |          |
|-----|---|----------|----------|
| 219 | V | 0.666661 | 2.631803 |
| 220 | V | 0.668281 | 2.798407 |
| 221 | V | 0.673366 | 2.847118 |
| 222 | V | 0.682359 | 2.749000 |
| 223 | V | 0.684930 | 2.773863 |
| 224 | V | 0.690161 | 2.789755 |
| 225 | V | 0.698266 | 2.687331 |
| 226 | V | 0.701514 | 2.605277 |
| 227 | V | 0.718904 | 2.636241 |
| 228 | V | 0.723127 | 2.663433 |
| 229 | V | 0.731029 | 2.708624 |
| 230 | V | 0.735488 | 2.495755 |
| 231 | V | 0.744754 | 2.951637 |
| 232 | V | 0.752072 | 2.764872 |
| 233 | V | 0.763935 | 2.779462 |
| 234 | V | 0.769175 | 2.663686 |
| 235 | V | 0.773115 | 2.712063 |
| 236 | V | 0.777936 | 2.699055 |
| 237 | V | 0.791988 | 2.889425 |
| 238 | V | 0.796452 | 2.788025 |
| 239 | V | 0.799560 | 3.133309 |
| 240 | V | 0.810805 | 2.962691 |
| 241 | V | 0.822477 | 2.811543 |
| 242 | V | 0.828630 | 2.688959 |
| 243 | V | 0.833385 | 2.955356 |
| 244 | V | 0.839053 | 2.971602 |
| 245 | V | 0.850117 | 2.834411 |
| 246 | V | 0.858116 | 2.460297 |
| 247 | V | 0.862930 | 2.598581 |
| 248 | V | 0.869964 | 2.615802 |
| 249 | V | 0.882137 | 3.125596 |
| 250 | V | 0.900678 | 2.756822 |
| 251 | V | 0.904585 | 2.477253 |
| 252 | V | 0.908464 | 2.626675 |
| 253 | V | 0.913806 | 3.048923 |
| 254 | V | 0.922669 | 2.784719 |
| 255 | V | 0.931318 | 3.137095 |
| 256 | V | 0.948132 | 2.809783 |
| 257 | V | 0.953606 | 2.498555 |
| 258 | V | 0.970293 | 2.612723 |
| 259 | V | 0.986558 | 2.625682 |
| 260 | V | 0.989126 | 2.588970 |
| 261 | V | 1.005468 | 2.663034 |
| 262 | V | 1.017727 | 2.602743 |
| 263 | V | 1.032286 | 2.526432 |
| 264 | V | 1.043641 | 2.498571 |
| 265 | V | 1.051151 | 2.690975 |
| 266 | V | 1.061053 | 2.603728 |
| 267 | V | 1.065279 | 2.561914 |
| 268 | V | 1.077499 | 2.699871 |

|     |   |          |          |
|-----|---|----------|----------|
| 269 | V | 1.080088 | 2.701139 |
| 270 | V | 1.091369 | 2.680428 |
| 271 | V | 1.096212 | 2.641792 |
| 272 | V | 1.115529 | 2.724595 |
| 273 | V | 1.121896 | 2.539681 |
| 274 | V | 1.129840 | 2.648430 |
| 275 | V | 1.130440 | 2.595350 |
| 276 | V | 1.143563 | 2.605849 |
| 277 | V | 1.158869 | 2.707609 |
| 278 | V | 1.163231 | 2.555771 |
| 279 | V | 1.166907 | 2.598116 |
| 280 | V | 1.171847 | 2.571305 |
| 281 | V | 1.177765 | 2.613342 |
| 282 | V | 1.184805 | 2.682211 |
| 283 | V | 1.186691 | 2.500260 |
| 284 | V | 1.219799 | 2.664645 |
| 285 | V | 1.228007 | 2.579480 |
| 286 | V | 1.230113 | 2.678759 |
| 287 | V | 1.238666 | 2.587945 |
| 288 | V | 1.248714 | 2.647314 |
| 289 | V | 1.249684 | 2.729764 |
| 290 | V | 1.258741 | 2.669372 |
| 291 | V | 1.265758 | 2.760458 |
| 292 | V | 1.277335 | 2.957220 |
| 293 | V | 1.279971 | 2.732644 |
| 294 | V | 1.289680 | 2.727332 |
| 295 | V | 1.294568 | 2.732880 |
| 296 | V | 1.310208 | 2.788239 |
| 297 | V | 1.333259 | 2.744500 |
| 298 | V | 1.339281 | 2.774209 |
| 299 | V | 1.350778 | 2.828452 |
| 300 | V | 1.379572 | 2.931294 |
| 301 | V | 1.393543 | 2.980190 |
| 302 | V | 1.402628 | 2.933912 |
| 303 | V | 1.443007 | 3.000738 |
| 304 | V | 1.461650 | 2.959465 |
| 305 | V | 1.469449 | 3.027651 |
| 306 | V | 1.489865 | 3.242920 |
| 307 | V | 1.513139 | 3.273767 |
| 308 | V | 1.545765 | 2.875325 |
| 309 | V | 1.556692 | 3.547061 |
| 310 | V | 1.564850 | 3.199630 |
| 311 | V | 1.569764 | 3.125940 |
| 312 | V | 1.572114 | 3.241197 |
| 313 | V | 1.584753 | 3.164954 |
| 314 | V | 1.599886 | 3.137047 |
| 315 | V | 1.610760 | 3.274180 |
| 316 | V | 1.619636 | 3.233451 |
| 317 | V | 1.630681 | 3.553728 |
| 318 | V | 1.643999 | 3.124735 |

|     |   |          |          |
|-----|---|----------|----------|
| 319 | V | 1.647107 | 3.148755 |
| 320 | V | 1.649625 | 3.251754 |
| 321 | V | 1.654258 | 3.327742 |
| 322 | V | 1.662027 | 3.421414 |
| 323 | V | 1.664295 | 2.970718 |
| 324 | V | 1.676071 | 3.120629 |
| 325 | V | 1.691657 | 3.239697 |
| 326 | V | 1.705919 | 3.260273 |
| 327 | V | 1.718424 | 3.252290 |
| 328 | V | 1.726601 | 3.152747 |
| 329 | V | 1.731419 | 3.311262 |
| 330 | V | 1.736626 | 3.183187 |
| 331 | V | 1.740421 | 3.251451 |
| 332 | V | 1.743867 | 3.441897 |
| 333 | V | 1.751533 | 3.159312 |
| 334 | V | 1.753101 | 3.366564 |
| 335 | V | 1.760145 | 3.502226 |
| 336 | V | 1.769056 | 3.280585 |
| 337 | V | 1.776157 | 3.400844 |
| 338 | V | 1.779720 | 3.410422 |
| 339 | V | 1.787020 | 3.320278 |
| 340 | V | 1.790773 | 3.557952 |
| 341 | V | 1.794971 | 3.371341 |
| 342 | V | 1.823139 | 3.362241 |
| 343 | V | 1.826636 | 3.029631 |
| 344 | V | 1.832830 | 3.305413 |
| 345 | V | 1.838934 | 3.520466 |
| 346 | V | 1.840619 | 3.341016 |
| 347 | V | 1.844946 | 3.081513 |
| 348 | V | 1.870241 | 3.450346 |
| 349 | V | 1.882788 | 3.459323 |
| 350 | V | 1.892268 | 3.432809 |
| 351 | V | 1.901041 | 3.346616 |
| 352 | V | 1.907932 | 3.296357 |
| 353 | V | 1.909434 | 3.499769 |
| 354 | V | 1.922088 | 3.522003 |
| 355 | V | 1.923134 | 3.644293 |
| 356 | V | 1.958504 | 3.686854 |
| 357 | V | 1.960846 | 3.379478 |
| 358 | V | 1.966817 | 3.659049 |
| 359 | V | 1.995643 | 3.645559 |
| 360 | V | 2.000461 | 3.929243 |
| 361 | V | 2.012255 | 3.397433 |
| 362 | V | 2.016210 | 3.376052 |
| 363 | V | 2.031616 | 3.578991 |
| 364 | V | 2.046894 | 3.632822 |
| 365 | V | 2.070626 | 3.817567 |
| 366 | V | 2.078073 | 3.717215 |
| 367 | V | 2.087897 | 3.525160 |
| 368 | V | 2.097513 | 3.522152 |



|     |   |          |          |
|-----|---|----------|----------|
| 369 | V | 2.102507 | 3.698386 |
| 370 | V | 2.118984 | 3.637851 |
| 371 | V | 2.124473 | 3.794278 |
| 372 | V | 2.134149 | 3.603244 |
| 373 | V | 2.142380 | 3.729314 |
| 374 | V | 2.148458 | 3.684741 |
| 375 | V | 2.159728 | 3.547461 |
| 376 | V | 2.179456 | 3.664604 |
| 377 | V | 2.185967 | 3.747150 |
| 378 | V | 2.191994 | 3.523921 |
| 379 | V | 2.207744 | 3.500963 |
| 380 | V | 2.217674 | 3.886661 |
| 381 | V | 2.223334 | 3.635469 |
| 382 | V | 2.230241 | 3.424902 |
| 383 | V | 2.233931 | 3.538102 |
| 384 | V | 2.242498 | 3.602966 |
| 385 | V | 2.249560 | 3.489818 |
| 386 | V | 2.262484 | 3.619661 |
| 387 | V | 2.266130 | 3.575769 |
| 388 | V | 2.272181 | 3.949747 |
| 389 | V | 2.275477 | 3.464182 |
| 390 | V | 2.289401 | 3.819978 |
| 391 | V | 2.294654 | 3.694345 |
| 392 | V | 2.298901 | 3.675142 |
| 393 | V | 2.301445 | 3.729822 |
| 394 | V | 2.316899 | 3.849188 |
| 395 | V | 2.333717 | 3.889949 |
| 396 | V | 2.338635 | 3.883077 |
| 397 | V | 2.348898 | 3.898347 |
| 398 | V | 2.357025 | 4.027872 |
| 399 | V | 2.377084 | 3.861704 |
| 400 | V | 2.379359 | 3.953729 |
| 401 | V | 2.382040 | 4.112699 |
| 402 | V | 2.392001 | 3.936023 |
| 403 | V | 2.401883 | 3.654448 |
| 404 | V | 2.415862 | 3.806384 |
| 405 | V | 2.419874 | 3.804832 |
| 406 | V | 2.433993 | 4.014394 |
| 407 | V | 2.441834 | 3.855658 |
| 408 | V | 2.458786 | 3.748281 |
| 409 | V | 2.459079 | 3.871422 |
| 410 | V | 2.473972 | 3.860497 |
| 411 | V | 2.483560 | 4.206466 |
| 412 | V | 2.497361 | 3.968944 |
| 413 | V | 2.507318 | 4.204021 |
| 414 | V | 2.513704 | 4.036434 |
| 415 | V | 2.529156 | 4.246161 |
| 416 | V | 2.531844 | 3.970495 |
| 417 | V | 2.543393 | 3.972688 |
| 418 | V | 2.543821 | 4.264905 |

|     |   |          |          |
|-----|---|----------|----------|
| 419 | V | 2.553140 | 4.315526 |
| 420 | V | 2.563071 | 4.183385 |
| 421 | V | 2.578647 | 4.372499 |
| 422 | V | 2.591023 | 3.979570 |
| 423 | V | 2.598442 | 4.016390 |
| 424 | V | 2.615949 | 4.023726 |
| 425 | V | 2.619039 | 4.359767 |
| 426 | V | 2.628133 | 4.306506 |
| 427 | V | 2.633858 | 4.227561 |
| 428 | V | 2.669510 | 4.338289 |
| 429 | V | 2.678593 | 4.570175 |
| 430 | V | 2.702155 | 4.584164 |
| 431 | V | 2.721709 | 4.535013 |
| 432 | V | 2.738945 | 4.528767 |
| 433 | V | 2.740953 | 4.603133 |
| 434 | V | 2.753581 | 4.703421 |
| 435 | V | 2.759331 | 4.637364 |
| 436 | V | 2.804658 | 4.848157 |
| 437 | V | 2.812667 | 4.581155 |
| 438 | V | 2.841129 | 4.582716 |
| 439 | V | 2.879440 | 4.750694 |
| 440 | V | 2.896815 | 4.701339 |
| 441 | V | 2.911151 | 4.496142 |
| 442 | V | 2.919748 | 4.783652 |
| 443 | V | 2.971113 | 4.841718 |
| 444 | V | 2.992213 | 4.944758 |
| 445 | V | 3.009119 | 4.889872 |
| 446 | V | 3.021653 | 4.908845 |
| 447 | V | 3.042170 | 4.939911 |
| 448 | V | 3.071102 | 4.794224 |
| 449 | V | 3.077892 | 4.943138 |
| 450 | V | 3.093132 | 4.847096 |
| 451 | V | 3.108158 | 4.847475 |
| 452 | V | 3.119068 | 4.870303 |
| 453 | V | 3.163910 | 5.206741 |
| 454 | V | 3.180208 | 5.038397 |
| 455 | V | 3.225649 | 5.214189 |
| 456 | V | 3.260252 | 5.104558 |
| 457 | V | 3.266040 | 5.114959 |
| 458 | V | 3.312802 | 5.201036 |
| 459 | V | 3.334186 | 5.299962 |
| 460 | V | 3.389818 | 5.230039 |
| 461 | V | 3.410194 | 5.444840 |
| 462 | V | 3.488135 | 5.527047 |
| 463 | V | 3.612711 | 5.554150 |
| 464 | V | 3.714828 | 5.643817 |
| 465 | V | 3.778102 | 5.661262 |

Total kinetic energy from orbitals= 1.350375837688D+03

9.4. (*E/Z*)-4-(2-((5-nitrofuran-2-yl)methylene)hydrazineyl)-2-phenylquinazoline **3a** in complex with Zn(II)

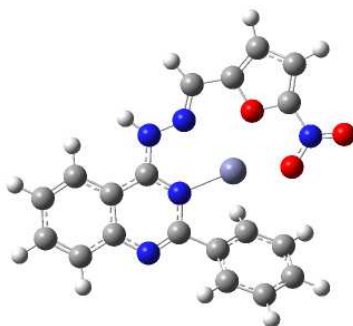

**Standard orientation:**

| Center Number | Atomic Number | Atomic Type | Coordinates (Angstroms) |           |           |
|---------------|---------------|-------------|-------------------------|-----------|-----------|
|               |               |             | X                       | Y         | Z         |
| 1             | 6             | 0           | 5.422971                | -2.106802 | 0.113708  |
| 2             | 6             | 0           | 4.066266                | -2.260855 | -0.004418 |
| 3             | 6             | 0           | 3.230951                | -1.118960 | -0.013498 |
| 4             | 6             | 0           | 3.806724                | 0.181299  | 0.092877  |
| 5             | 6             | 0           | 5.202570                | 0.306351  | 0.215402  |
| 6             | 6             | 0           | 5.991297                | -0.818046 | 0.226869  |
| 7             | 1             | 0           | 6.068216                | -2.977938 | 0.119078  |
| 8             | 1             | 0           | 3.658316                | -3.262815 | -0.092794 |
| 9             | 6             | 0           | 1.817702                | -1.148228 | -0.088892 |
| 10            | 1             | 0           | 5.620787                | 1.303014  | 0.291546  |
| 11            | 1             | 0           | 7.067661                | -0.720381 | 0.319129  |
| 12            | 6             | 0           | 1.767120                | 1.183332  | -0.050480 |
| 13            | 7             | 0           | 3.046021                | 1.319251  | 0.058606  |
| 14            | 7             | 0           | 1.105838                | -0.027331 | -0.082604 |
| 15            | 7             | 0           | 1.100577                | -2.326820 | -0.158421 |
| 16            | 7             | 0           | -0.227181               | -2.218015 | -0.155724 |
| 17            | 6             | 0           | 0.849025                | 2.340498  | -0.146708 |
| 18            | 6             | 0           | -0.271690               | 2.253790  | -1.010599 |
| 19            | 6             | 0           | 1.031967                | 3.476374  | 0.631733  |
| 20            | 6             | 0           | -1.197687               | 3.303191  | -1.060054 |
| 21            | 1             | 0           | -0.247220               | 1.546410  | -1.848139 |
| 22            | 6             | 0           | 0.096951                | 4.507387  | 0.575310  |
| 23            | 1             | 0           | 1.897235                | 3.543509  | 1.281588  |
| 24            | 6             | 0           | -1.022641               | 4.416823  | -0.249619 |
| 25            | 1             | 0           | -2.026664               | 3.262522  | -1.758254 |
| 26            | 1             | 0           | 0.242213                | 5.391231  | 1.187555  |
| 27            | 1             | 0           | -1.738532               | 5.230328  | -0.283179 |
| 28            | 1             | 0           | 1.563118                | -3.228726 | -0.152911 |
| 29            | 6             | 0           | -1.057122               | -3.195546 | -0.183617 |
| 30            | 1             | 0           | -0.802613               | -4.252880 | -0.232840 |
| 31            | 6             | 0           | -2.439745               | -2.752264 | -0.094349 |
| 32            | 6             | 0           | -3.705255               | -3.258634 | -0.006070 |
| 33            | 8             | 0           | -2.504024               | -1.390074 | 0.001334  |

|    |    |   |           |           |           |
|----|----|---|-----------|-----------|-----------|
| 34 | 6  | 0 | -4.596386 | -2.150595 | 0.171154  |
| 35 | 1  | 0 | -3.987634 | -4.301536 | -0.046497 |
| 36 | 6  | 0 | -3.799841 | -1.050286 | 0.172138  |
| 37 | 1  | 0 | -5.670703 | -2.179783 | 0.292645  |
| 38 | 7  | 0 | -3.928732 | 0.343602  | 0.359147  |
| 39 | 8  | 0 | -2.838992 | 0.997147  | 0.346651  |
| 40 | 8  | 0 | -5.006305 | 0.839795  | 0.518178  |
| 41 | 30 | 0 | -0.922811 | 0.159477  | -0.063286 |

-----  
Rotational constants (GHZ): 0.2650736 0.1355138 0.0915378

Cycle 10 Pass 1 IDiag 1:

RMSU= 6.25D-09 CP: 1.00D+00 1.04D+00 6.19D-01 1.10D+00 8.05D-01  
CP: 1.23D+00 1.15D+00

E= -1230.48999739917 Delta-E= 0.000000000005 Rises=F Damp=F

DIIS: error= 6.62D-08 at cycle 8 NSaved= 8.

NSaved= 8 IEnMin= 7 EnMin= -1230.48999739917 IErMin= 8 ErrMin= 6.62D-08

ErrMax= 6.62D-08 0.00D+00 EMaxC= 1.00D-01 BMatC= 1.14D-12 BMatP= 3.81D-12

IDIUse=1 WtCom= 1.00D+00 WtEn= 0.00D+00

Coeff-Com: -0.166D-03 0.684D-02 0.325D-02-0.699D-01-0.881D-01-0.379D-01

Coeff-Com: 0.410D+00 0.776D+00

Coeff: -0.166D-03 0.684D-02 0.325D-02-0.699D-01-0.881D-01-0.379D-01

Coeff: 0.410D+00 0.776D+00

Gap= 0.217 Goal= None Shift= 0.000

RMSDP=6.56D-09 MaxDP=5.18D-07 DE= 4.55D-12 OVMax= 1.74D-06

SCF Done: E(RCAM-B3LYP) = -1230.48999740 A.U. after 10 cycles

NFock= 10 Conv=0.66D-08 -V/T= 2.0063

KE= 1.222744431539D+03 PE=-7.432092622106D+03 EE= 2.697104146851D+03

Leave Link 502 at Thu Sep 15 17:05:16 2022, MaxMem= 2147483648 cpu: 1564.9

(Enter /opt/gaussian/g09/l701.exe)

Compute integral first derivatives.

... and contract with generalized density number 0.

Leave Link 701 at Thu Sep 15 17:05:17 2022, MaxMem= 2147483648 cpu: 5.7

(Enter /opt/gaussian/g09/l702.exe)

L702 exits ... SP integral derivatives will be done elsewhere.

Leave Link 702 at Thu Sep 15 17:05:17 2022, MaxMem= 2147483648 cpu: 0.8

(Enter /opt/gaussian/g09/l703.exe)

Compute integral first derivatives, UseDBF=F ICtDFT= 0.

Integral derivatives from FoFJK, PRISM(SPDF).

Calling FoFJK, ICntrl= 2127 FMM=F ISym2X=0 IICent= 0 IOpClX= 0 NMat=1  
NMatS=1 NMatT=0.

FoFJK: IHMeth= 1 ICntrl= 2127 DoSepK=T KAlg= 0 IICent= 0 FoldK=F

IRaf= 1 NMat= 1 IRICut= 1 DoRegI=T DoRafI=F ISym2E= 0.

FoFCou: FMM=F IPFlag= 0 FMFlag= 100000 FMFlg1= 800

NFxFlg= 0 DoJE=F BraDBF=F KetDBF=F FulRan=T

wScrn= 0.000000 ICntrl= 2527 IOpCl= 0 IICent= 0 NGrid= 0

NMat0= 1 NMatS0= 1 NMatT0= 0 NMatD0= 1 NMtDS0= 0  
NMtDT0= 0

Symmetry not used in FoFCou.

Leave Link 703 at Thu Sep 15 17:07:03 2022, MaxMem= 2147483648 cpu: 849.0  
(Enter /opt/gaussian/g09/1716.exe)

Dipole = 7.86255013D-01-3.21191683D+00-2.55910265D-01

\*\*\*\*\* Axes restored to original set \*\*\*\*\*

Cartesian Forces: Max 0.076524475 RMS 0.012357602

Leave Link 716 at Thu Sep 15 17:07:04 2022, MaxMem= 2147483648 cpu: 0.8  
(Enter /opt/gaussian/g09/1122.exe)

CPIOFr: IOpCl= 0 IRwI=-1 IRwCP= 731 ICalc= 4 LCPTot= 332729 Len1MO=  
859619 IndFrg= 4630824

Restoring MOs from calculation 1 to rwf.

CPIOFr: IOpCl= 0 IRwI=-2 IRwCP= 731 ICalc= 0 LCPTot= 332729 Len1MO=  
859619 IndFrg= 1192348

Counterpoise corrected energy = -1295.567377170607

BSSE energy = 0.012400118580

sum of monomers = -1295.069316729376

complexation energy = -320.32 kcal/mole (raw)

**complexation energy = -312.54 kcal/mole (corrected)**

Leave Link 122 at Thu Sep 15 17:07:04 2022, MaxMem= 2147483648 cpu: 0.4  
(Enter /opt/gaussian/g09/1716.exe)

Rotating derivatives to standard orientation.

Dipole =-1.02340469D+00-3.22105232D+00-4.20267598D-02

### Orbital energies and kinetic energies (alpha):

|    |   | 1          | 2         |
|----|---|------------|-----------|
| 1  | O | -19.602883 | 29.117244 |
| 2  | O | -19.543404 | 29.122550 |
| 3  | O | -19.536732 | 29.122124 |
| 4  | O | -14.935730 | 22.048939 |
| 5  | O | -14.753451 | 22.046288 |
| 6  | O | -14.750140 | 22.049361 |
| 7  | O | -14.690581 | 22.049144 |
| 8  | O | -14.635367 | 22.049810 |
| 9  | O | -10.641608 | 15.949527 |
| 10 | O | -10.623179 | 15.952528 |
| 11 | O | -10.620247 | 15.952262 |
| 12 | O | -10.596816 | 15.951643 |
| 13 | O | -10.579534 | 15.952914 |
| 14 | O | -10.564986 | 15.953690 |
| 15 | O | -10.548986 | 15.953244 |
| 16 | O | -10.534406 | 15.954284 |
| 17 | O | -10.515822 | 15.953610 |
| 18 | O | -10.514876 | 15.954573 |
| 19 | O | -10.507867 | 15.953407 |
| 20 | O | -10.497037 | 15.953914 |
| 21 | O | -10.495373 | 15.953485 |
| 22 | O | -10.486451 | 15.954544 |
| 23 | O | -10.485620 | 15.952885 |

|    |   |            |           |
|----|---|------------|-----------|
| 24 | O | -10.480548 | 15.954716 |
| 25 | O | -10.480004 | 15.953461 |
| 26 | O | -10.479726 | 15.953217 |
| 27 | O | -10.471619 | 15.952977 |
| 28 | O | -1.600874  | 2.484780  |
| 29 | O | -1.520408  | 2.497606  |
| 30 | O | -1.417159  | 2.750974  |
| 31 | O | -1.410806  | 2.020585  |
| 32 | O | -1.327611  | 1.848590  |
| 33 | O | -1.250789  | 1.923370  |
| 34 | O | -1.215774  | 1.989445  |
| 35 | O | -1.192890  | 1.919399  |
| 36 | O | -1.184106  | 1.738981  |
| 37 | O | -1.175473  | 1.692849  |
| 38 | O | -1.158964  | 1.679505  |
| 39 | O | -1.102518  | 1.724463  |
| 40 | O | -1.083436  | 1.794069  |
| 41 | O | -1.063167  | 1.847071  |
| 42 | O | -1.061568  | 1.731886  |
| 43 | O | -1.044331  | 1.735298  |
| 44 | O | -1.010114  | 7.687710  |
| 45 | O | -1.007905  | 6.494897  |
| 46 | O | -1.002592  | 3.862603  |
| 47 | O | -1.000128  | 10.096717 |
| 48 | O | -0.997576  | 11.070563 |
| 49 | O | -0.995423  | 11.082978 |
| 50 | O | -0.986393  | 6.350547  |
| 51 | O | -0.975355  | 2.229146  |
| 52 | O | -0.952744  | 2.068015  |
| 53 | O | -0.937096  | 2.657672  |
| 54 | O | -0.930280  | 1.816143  |
| 55 | O | -0.923127  | 2.571373  |
| 56 | O | -0.912855  | 1.637194  |
| 57 | O | -0.899755  | 1.734145  |
| 58 | O | -0.898459  | 1.691852  |
| 59 | O | -0.889818  | 1.771380  |
| 60 | O | -0.867451  | 1.676907  |
| 61 | O | -0.856922  | 2.565053  |
| 62 | O | -0.842928  | 1.489824  |
| 63 | O | -0.834373  | 1.769731  |
| 64 | O | -0.829675  | 1.516568  |
| 65 | O | -0.816000  | 1.516731  |
| 66 | O | -0.811129  | 1.548647  |
| 67 | O | -0.801278  | 1.408409  |
| 68 | O | -0.779963  | 1.922182  |
| 69 | O | -0.767783  | 1.483616  |
| 70 | O | -0.765818  | 1.477928  |
| 71 | O | -0.760954  | 1.506409  |
| 72 | O | -0.756575  | 1.392399  |
| 73 | O | -0.751759  | 1.510266  |

|     |   |           |          |
|-----|---|-----------|----------|
| 74  | O | -0.742148 | 1.377104 |
| 75  | O | -0.736045 | 1.435139 |
| 76  | O | -0.721144 | 1.451886 |
| 77  | O | -0.717105 | 1.371246 |
| 78  | O | -0.715387 | 1.239859 |
| 79  | O | -0.704151 | 1.479973 |
| 80  | O | -0.678205 | 1.321326 |
| 81  | O | -0.669758 | 2.449201 |
| 82  | O | -0.663375 | 1.303069 |
| 83  | O | -0.658389 | 2.234357 |
| 84  | O | -0.654158 | 1.783929 |
| 85  | O | -0.650967 | 1.472894 |
| 86  | O | -0.645333 | 2.301629 |
| 87  | O | -0.643566 | 1.556150 |
| 88  | O | -0.635187 | 1.601890 |
| 89  | O | -0.632772 | 1.540027 |
| 90  | O | -0.632349 | 1.499196 |
| 91  | O | -0.628960 | 1.617951 |
| 92  | O | -0.605710 | 1.458573 |
| 93  | O | -0.562967 | 1.507146 |
| 94  | O | -0.559739 | 1.798181 |
| 95  | O | -0.545771 | 1.311917 |
| 96  | O | -0.540547 | 1.299502 |
| 97  | O | -0.532075 | 1.259348 |
| 98  | O | -0.501145 | 1.352349 |
| 99  | V | -0.333143 | 2.069237 |
| 100 | V | -0.273718 | 1.842187 |
| 101 | V | -0.262531 | 1.350665 |
| 102 | V | -0.232968 | 1.625128 |
| 103 | V | -0.226637 | 1.568080 |
| 104 | V | -0.206187 | 0.761220 |
| 105 | V | -0.189273 | 1.254462 |
| 106 | V | -0.167124 | 1.410741 |
| 107 | V | -0.161148 | 2.011279 |
| 108 | V | -0.145385 | 0.841436 |
| 109 | V | -0.142248 | 1.088867 |
| 110 | V | -0.137706 | 0.979530 |
| 111 | V | -0.123058 | 1.665100 |
| 112 | V | -0.119300 | 1.033667 |
| 113 | V | -0.096336 | 1.710005 |
| 114 | V | -0.088949 | 1.371932 |
| 115 | V | -0.082130 | 2.138537 |
| 116 | V | -0.065469 | 1.047049 |
| 117 | V | -0.060420 | 1.263153 |
| 118 | V | -0.053706 | 1.094779 |
| 119 | V | -0.035041 | 1.179903 |
| 120 | V | -0.027907 | 1.587080 |
| 121 | V | -0.022463 | 2.007121 |
| 122 | V | -0.018489 | 1.475821 |
| 123 | V | -0.015531 | 1.699624 |

|     |   |           |          |
|-----|---|-----------|----------|
| 124 | V | -0.004171 | 1.662164 |
| 125 | V | -0.000829 | 1.646523 |
| 126 | V | 0.005158  | 1.407243 |
| 127 | V | 0.018501  | 1.445553 |
| 128 | V | 0.023760  | 1.698523 |
| 129 | V | 0.030213  | 1.847507 |
| 130 | V | 0.033936  | 1.775610 |
| 131 | V | 0.038992  | 1.771677 |
| 132 | V | 0.046138  | 1.510403 |
| 133 | V | 0.050923  | 1.386717 |
| 134 | V | 0.058950  | 1.652727 |
| 135 | V | 0.066066  | 1.635121 |
| 136 | V | 0.073865  | 2.191405 |
| 137 | V | 0.084126  | 1.882122 |
| 138 | V | 0.090382  | 2.071875 |
| 139 | V | 0.099281  | 2.301288 |
| 140 | V | 0.110818  | 2.109374 |
| 141 | V | 0.122859  | 1.786346 |
| 142 | V | 0.129751  | 1.926193 |
| 143 | V | 0.141889  | 1.956722 |
| 144 | V | 0.143252  | 1.672263 |
| 145 | V | 0.147664  | 2.235498 |
| 146 | V | 0.158368  | 1.979385 |
| 147 | V | 0.164283  | 2.208905 |
| 148 | V | 0.180631  | 1.890256 |
| 149 | V | 0.188203  | 2.204064 |
| 150 | V | 0.190664  | 1.955133 |
| 151 | V | 0.205626  | 1.926177 |
| 152 | V | 0.216865  | 2.264081 |
| 153 | V | 0.232537  | 2.097477 |
| 154 | V | 0.245728  | 2.155111 |
| 155 | V | 0.262452  | 2.066823 |
| 156 | V | 0.282329  | 1.927552 |
| 157 | V | 0.306926  | 2.006113 |
| 158 | V | 0.318813  | 2.079723 |
| 159 | V | 0.324009  | 2.049175 |
| 160 | V | 0.325733  | 2.081710 |
| 161 | V | 0.340577  | 2.248419 |
| 162 | V | 0.343180  | 2.640199 |
| 163 | V | 0.352572  | 2.323407 |
| 164 | V | 0.356685  | 2.426567 |
| 165 | V | 0.360896  | 2.294519 |
| 166 | V | 0.369131  | 2.301604 |
| 167 | V | 0.371873  | 2.359824 |
| 168 | V | 0.375332  | 2.268851 |
| 169 | V | 0.379708  | 2.233645 |
| 170 | V | 0.385175  | 2.244005 |
| 171 | V | 0.386369  | 2.168333 |
| 172 | V | 0.395241  | 2.513755 |
| 173 | V | 0.399038  | 2.128654 |



|     |   |          |          |
|-----|---|----------|----------|
| 174 | V | 0.403954 | 2.153534 |
| 175 | V | 0.406900 | 2.232304 |
| 176 | V | 0.414610 | 2.180684 |
| 177 | V | 0.416623 | 2.378294 |
| 178 | V | 0.422481 | 2.266960 |
| 179 | V | 0.427416 | 2.353719 |
| 180 | V | 0.436727 | 2.377322 |
| 181 | V | 0.439963 | 2.326032 |
| 182 | V | 0.447510 | 2.153764 |
| 183 | V | 0.455593 | 2.238398 |
| 184 | V | 0.457596 | 2.428696 |
| 185 | V | 0.463606 | 2.337715 |
| 186 | V | 0.463904 | 2.251615 |
| 187 | V | 0.469368 | 2.324889 |
| 188 | V | 0.476605 | 2.074099 |
| 189 | V | 0.478815 | 2.166332 |
| 190 | V | 0.479929 | 2.240815 |
| 191 | V | 0.486594 | 2.224964 |
| 192 | V | 0.488729 | 2.484924 |
| 193 | V | 0.497938 | 2.392182 |
| 194 | V | 0.506659 | 2.602338 |
| 195 | V | 0.519904 | 2.426604 |
| 196 | V | 0.527341 | 2.367710 |
| 197 | V | 0.538855 | 2.767513 |
| 198 | V | 0.549258 | 2.670920 |
| 199 | V | 0.555316 | 2.317642 |
| 200 | V | 0.562150 | 2.641258 |
| 201 | V | 0.571253 | 2.732412 |
| 202 | V | 0.577743 | 2.628847 |
| 203 | V | 0.591100 | 2.699603 |
| 204 | V | 0.595002 | 2.715357 |
| 205 | V | 0.604276 | 2.533379 |
| 206 | V | 0.606039 | 2.414282 |
| 207 | V | 0.611337 | 2.648897 |
| 208 | V | 0.619049 | 2.672807 |
| 209 | V | 0.626402 | 2.546403 |
| 210 | V | 0.635073 | 2.743487 |
| 211 | V | 0.647507 | 2.843859 |
| 212 | V | 0.649795 | 2.777570 |
| 213 | V | 0.658086 | 2.863516 |
| 214 | V | 0.665724 | 2.563843 |
| 215 | V | 0.673807 | 2.502350 |
| 216 | V | 0.679212 | 2.757759 |
| 217 | V | 0.683699 | 2.655450 |
| 218 | V | 0.689945 | 2.649637 |
| 219 | V | 0.694973 | 2.647636 |
| 220 | V | 0.695591 | 2.625115 |
| 221 | V | 0.700994 | 2.676191 |
| 222 | V | 0.703485 | 2.619107 |
| 223 | V | 0.719943 | 2.583807 |

|     |   |          |          |
|-----|---|----------|----------|
| 224 | V | 0.730495 | 2.682238 |
| 225 | V | 0.736202 | 3.016625 |
| 226 | V | 0.741252 | 2.523193 |
| 227 | V | 0.745338 | 2.609316 |
| 228 | V | 0.753954 | 2.573233 |
| 229 | V | 0.760423 | 2.670152 |
| 230 | V | 0.766914 | 2.816729 |
| 231 | V | 0.780359 | 2.951205 |
| 232 | V | 0.785275 | 2.955234 |
| 233 | V | 0.799249 | 2.830439 |
| 234 | V | 0.804544 | 2.735481 |
| 235 | V | 0.814700 | 2.952125 |
| 236 | V | 0.819269 | 2.732738 |
| 237 | V | 0.822017 | 2.691318 |
| 238 | V | 0.830604 | 2.781916 |
| 239 | V | 0.841648 | 2.724031 |
| 240 | V | 0.843992 | 2.962504 |
| 241 | V | 0.851403 | 2.631723 |
| 242 | V | 0.869819 | 2.845872 |
| 243 | V | 0.873111 | 2.828139 |
| 244 | V | 0.882525 | 2.601108 |
| 245 | V | 0.895839 | 2.474187 |
| 246 | V | 0.902108 | 2.942841 |
| 247 | V | 0.912322 | 2.466939 |
| 248 | V | 0.924721 | 2.669224 |
| 249 | V | 0.933258 | 2.439884 |
| 250 | V | 0.967787 | 2.549539 |
| 251 | V | 0.978525 | 2.939222 |
| 252 | V | 0.986323 | 2.646738 |
| 253 | V | 1.005640 | 2.666036 |
| 254 | V | 1.011469 | 2.862683 |
| 255 | V | 1.016487 | 2.560236 |
| 256 | V | 1.031896 | 2.734216 |
| 257 | V | 1.039627 | 2.916075 |
| 258 | V | 1.053218 | 2.694188 |
| 259 | V | 1.058341 | 2.556025 |
| 260 | V | 1.060697 | 2.653698 |
| 261 | V | 1.075245 | 2.638312 |
| 262 | V | 1.081529 | 2.714700 |
| 263 | V | 1.085924 | 2.849732 |
| 264 | V | 1.090450 | 2.680594 |
| 265 | V | 1.099626 | 2.639750 |
| 266 | V | 1.103695 | 2.599743 |
| 267 | V | 1.118374 | 2.620142 |
| 268 | V | 1.127632 | 2.837122 |
| 269 | V | 1.130612 | 2.695921 |
| 270 | V | 1.138074 | 2.699676 |
| 271 | V | 1.141397 | 2.764839 |
| 272 | V | 1.161987 | 3.037602 |
| 273 | V | 1.171550 | 2.785320 |

|     |   |          |          |
|-----|---|----------|----------|
| 274 | V | 1.186493 | 2.885367 |
| 275 | V | 1.194657 | 2.730174 |
| 276 | V | 1.204808 | 2.547956 |
| 277 | V | 1.209690 | 2.762364 |
| 278 | V | 1.220860 | 2.873431 |
| 279 | V | 1.223390 | 2.936943 |
| 280 | V | 1.233083 | 2.900548 |
| 281 | V | 1.249496 | 2.934204 |
| 282 | V | 1.253449 | 2.953451 |
| 283 | V | 1.262652 | 2.557980 |
| 284 | V | 1.266941 | 2.575012 |
| 285 | V | 1.269496 | 2.685942 |
| 286 | V | 1.277147 | 2.978745 |
| 287 | V | 1.284564 | 3.057945 |
| 288 | V | 1.294505 | 2.852220 |
| 289 | V | 1.308712 | 3.548562 |
| 290 | V | 1.318554 | 2.812854 |
| 291 | V | 1.338473 | 2.878506 |
| 292 | V | 1.343050 | 3.055483 |
| 293 | V | 1.344042 | 2.855855 |
| 294 | V | 1.359872 | 3.491044 |
| 295 | V | 1.394127 | 3.614065 |
| 296 | V | 1.417810 | 3.906765 |
| 297 | V | 1.424077 | 3.086982 |
| 298 | V | 1.440056 | 2.985576 |
| 299 | V | 1.453689 | 3.042225 |
| 300 | V | 1.479103 | 3.653187 |
| 301 | V | 1.483312 | 3.516150 |
| 302 | V | 1.493574 | 3.725050 |
| 303 | V | 1.509969 | 2.992488 |
| 304 | V | 1.540483 | 3.808440 |
| 305 | V | 1.569623 | 3.634400 |
| 306 | V | 1.582968 | 3.394729 |
| 307 | V | 1.589721 | 3.005836 |
| 308 | V | 1.596502 | 3.464798 |
| 309 | V | 1.598211 | 3.211658 |
| 310 | V | 1.608837 | 3.278967 |
| 311 | V | 1.611722 | 3.371437 |
| 312 | V | 1.614608 | 3.142429 |
| 313 | V | 1.628000 | 3.181936 |
| 314 | V | 1.630710 | 3.152342 |
| 315 | V | 1.638921 | 3.300541 |
| 316 | V | 1.648497 | 3.490055 |
| 317 | V | 1.664287 | 3.368240 |
| 318 | V | 1.670587 | 3.557828 |
| 319 | V | 1.676497 | 3.543008 |
| 320 | V | 1.683947 | 3.335861 |
| 321 | V | 1.698067 | 3.249693 |
| 322 | V | 1.705934 | 3.194162 |
| 323 | V | 1.710617 | 3.460710 |

|     |   |          |          |
|-----|---|----------|----------|
| 324 | V | 1.719389 | 3.651091 |
| 325 | V | 1.729166 | 3.782321 |
| 326 | V | 1.737950 | 3.354826 |
| 327 | V | 1.740833 | 3.286802 |
| 328 | V | 1.748697 | 3.271952 |
| 329 | V | 1.753372 | 3.470975 |
| 330 | V | 1.759440 | 3.251536 |
| 331 | V | 1.766093 | 3.594261 |
| 332 | V | 1.768757 | 3.400092 |
| 333 | V | 1.780918 | 3.381437 |
| 334 | V | 1.789149 | 3.570950 |
| 335 | V | 1.796327 | 3.164801 |
| 336 | V | 1.807082 | 3.529796 |
| 337 | V | 1.816972 | 3.407922 |
| 338 | V | 1.833137 | 3.607672 |
| 339 | V | 1.843347 | 3.727448 |
| 340 | V | 1.852509 | 3.165336 |
| 341 | V | 1.855630 | 3.464378 |
| 342 | V | 1.859855 | 3.003945 |
| 343 | V | 1.863887 | 3.182961 |
| 344 | V | 1.872247 | 3.707402 |
| 345 | V | 1.880646 | 3.216806 |
| 346 | V | 1.901224 | 4.126253 |
| 347 | V | 1.909289 | 3.603416 |
| 348 | V | 1.917067 | 3.671636 |
| 349 | V | 1.918369 | 3.729920 |
| 350 | V | 1.928197 | 3.589754 |
| 351 | V | 1.940603 | 3.484807 |
| 352 | V | 1.947611 | 3.446476 |
| 353 | V | 1.954245 | 3.947410 |
| 354 | V | 1.969108 | 3.634891 |
| 355 | V | 1.978444 | 3.410921 |
| 356 | V | 1.993967 | 3.689975 |
| 357 | V | 1.997389 | 3.411173 |
| 358 | V | 2.007694 | 3.686984 |
| 359 | V | 2.017220 | 3.716897 |
| 360 | V | 2.053192 | 3.499362 |
| 361 | V | 2.067665 | 3.886612 |
| 362 | V | 2.077995 | 3.542037 |
| 363 | V | 2.084156 | 3.498818 |
| 364 | V | 2.094633 | 3.784413 |
| 365 | V | 2.105526 | 3.799707 |
| 366 | V | 2.115156 | 3.558877 |
| 367 | V | 2.130192 | 3.747616 |
| 368 | V | 2.136694 | 3.742103 |
| 369 | V | 2.138407 | 3.663253 |
| 370 | V | 2.147764 | 3.667789 |
| 371 | V | 2.163692 | 3.742342 |
| 372 | V | 2.176463 | 3.491816 |
| 373 | V | 2.193592 | 3.703876 |

|     |   |          |          |
|-----|---|----------|----------|
| 374 | V | 2.200809 | 3.660952 |
| 375 | V | 2.208049 | 4.052527 |
| 376 | V | 2.222580 | 3.585836 |
| 377 | V | 2.227279 | 3.593725 |
| 378 | V | 2.231951 | 3.657371 |
| 379 | V | 2.243029 | 3.745181 |
| 380 | V | 2.245583 | 3.464920 |
| 381 | V | 2.250942 | 3.720637 |
| 382 | V | 2.251848 | 3.785387 |
| 383 | V | 2.258358 | 3.362011 |
| 384 | V | 2.263229 | 3.769762 |
| 385 | V | 2.276799 | 3.470643 |
| 386 | V | 2.280459 | 3.806655 |
| 387 | V | 2.296306 | 3.685691 |
| 388 | V | 2.310928 | 3.733068 |
| 389 | V | 2.313090 | 3.864256 |
| 390 | V | 2.327369 | 3.917169 |
| 391 | V | 2.328264 | 3.985808 |
| 392 | V | 2.332992 | 3.857154 |
| 393 | V | 2.341235 | 3.869950 |
| 394 | V | 2.351408 | 3.838773 |
| 395 | V | 2.370487 | 3.787960 |
| 396 | V | 2.374668 | 3.907773 |
| 397 | V | 2.387875 | 4.044538 |
| 398 | V | 2.402423 | 4.055540 |
| 399 | V | 2.410583 | 3.734870 |
| 400 | V | 2.415405 | 3.925677 |
| 401 | V | 2.424766 | 3.867465 |
| 402 | V | 2.446554 | 3.893269 |
| 403 | V | 2.448591 | 3.643245 |
| 404 | V | 2.451822 | 3.691944 |
| 405 | V | 2.464311 | 4.051756 |
| 406 | V | 2.473682 | 3.898794 |
| 407 | V | 2.477607 | 4.208391 |
| 408 | V | 2.481418 | 4.122320 |
| 409 | V | 2.490094 | 4.068879 |
| 410 | V | 2.496673 | 4.449220 |
| 411 | V | 2.529688 | 4.081431 |
| 412 | V | 2.537346 | 4.000531 |
| 413 | V | 2.542955 | 4.093652 |
| 414 | V | 2.554628 | 4.059206 |
| 415 | V | 2.566105 | 4.329205 |
| 416 | V | 2.573401 | 4.096396 |
| 417 | V | 2.585653 | 4.145563 |
| 418 | V | 2.594663 | 4.041089 |
| 419 | V | 2.611853 | 4.141111 |
| 420 | V | 2.629105 | 4.413806 |
| 421 | V | 2.631966 | 4.139840 |
| 422 | V | 2.644470 | 4.271710 |
| 423 | V | 2.647812 | 4.382391 |

|     |   |          |          |
|-----|---|----------|----------|
| 424 | V | 2.661339 | 4.505088 |
| 425 | V | 2.676341 | 4.597184 |
| 426 | V | 2.707229 | 4.512740 |
| 427 | V | 2.722115 | 4.803136 |
| 428 | V | 2.735816 | 4.632419 |
| 429 | V | 2.752243 | 4.656363 |
| 430 | V | 2.758857 | 4.558306 |
| 431 | V | 2.776937 | 4.779245 |
| 432 | V | 2.790063 | 4.733272 |
| 433 | V | 2.829021 | 4.616206 |
| 434 | V | 2.845417 | 4.818856 |
| 435 | V | 2.881897 | 4.715660 |
| 436 | V | 2.897589 | 4.481720 |
| 437 | V | 2.927437 | 4.753151 |
| 438 | V | 2.941499 | 4.964548 |
| 439 | V | 2.972756 | 4.819892 |
| 440 | V | 2.991565 | 4.903084 |
| 441 | V | 3.038604 | 4.924780 |
| 442 | V | 3.054421 | 4.977078 |
| 443 | V | 3.099918 | 4.922627 |
| 444 | V | 3.101883 | 4.812625 |
| 445 | V | 3.111835 | 4.868212 |
| 446 | V | 3.117916 | 4.878238 |
| 447 | V | 3.124393 | 4.853682 |
| 448 | V | 3.133897 | 5.194475 |
| 449 | V | 3.186387 | 5.205287 |
| 450 | V | 3.206101 | 5.020245 |
| 451 | V | 3.237344 | 5.069652 |
| 452 | V | 3.268201 | 5.085721 |
| 453 | V | 3.344716 | 5.256726 |
| 454 | V | 3.356868 | 5.285075 |
| 455 | V | 3.372032 | 5.226635 |
| 456 | V | 3.402420 | 5.411689 |
| 457 | V | 3.487781 | 5.563759 |
| 458 | V | 3.579923 | 5.554575 |
| 459 | V | 3.755066 | 5.647573 |
| 460 | V | 3.768529 | 5.640077 |
| 461 | V | 7.063015 | 2.534052 |

Total kinetic energy from orbitals= 1.337453319717D+03

9.5. *(E/Z)*-4-(2-((5-nitrofuran-2-yl)methylene)hydrazineyl)-2-(3-chlorophenyl)quinazolines **3f**

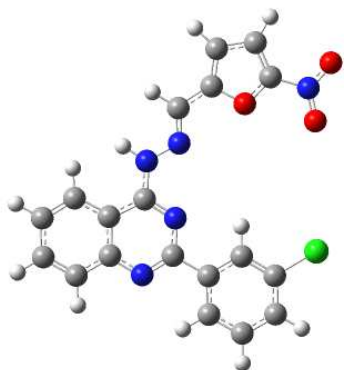

**Standard orientation:**

| Center Number | Atomic Number | Atomic Type | Coordinates (Angstroms) |           |           |
|---------------|---------------|-------------|-------------------------|-----------|-----------|
|               |               |             | X                       | Y         | Z         |
| 1             | 6             | 0           | 4.545455                | 3.790549  | -0.000293 |
| 2             | 6             | 0           | 3.230278                | 3.401486  | -0.000075 |
| 3             | 6             | 0           | 2.890809                | 2.030312  | -0.000067 |
| 4             | 6             | 0           | 3.918578                | 1.058804  | -0.000256 |
| 5             | 6             | 0           | 5.266947                | 1.486966  | -0.000489 |
| 6             | 6             | 0           | 5.571091                | 2.822281  | -0.000502 |
| 7             | 1             | 0           | 4.799017                | 4.844941  | -0.000307 |
| 8             | 1             | 0           | 2.462933                | 4.169487  | 0.000069  |
| 9             | 6             | 0           | 1.560796                | 1.487349  | 0.000161  |
| 10            | 1             | 0           | 6.034233                | 0.721613  | -0.000644 |
| 11            | 1             | 0           | 6.607713                | 3.142714  | -0.000672 |
| 12            | 6             | 0           | 2.395883                | -0.635473 | 0.000048  |
| 13            | 7             | 0           | 3.656904                | -0.275889 | -0.000223 |
| 14            | 7             | 0           | 1.329137                | 0.203706  | 0.000280  |
| 15            | 7             | 0           | 0.486135                | 2.351139  | 0.000458  |
| 16            | 7             | 0           | -0.779234               | 1.904339  | 0.000323  |
| 17            | 6             | 0           | 2.079936                | -2.086255 | 0.000165  |
| 18            | 6             | 0           | 0.749985                | -2.508256 | -0.000010 |
| 19            | 6             | 0           | 3.108812                | -3.029303 | 0.000410  |
| 20            | 6             | 0           | 0.472302                | -3.866149 | 0.000047  |
| 21            | 1             | 0           | -0.046035               | -1.774558 | -0.000180 |
| 22            | 6             | 0           | 2.809066                | -4.383085 | 0.000496  |
| 23            | 1             | 0           | 4.133922                | -2.680618 | 0.000516  |
| 24            | 6             | 0           | 1.487094                | -4.814039 | 0.000309  |
| 25            | 1             | 0           | 3.609478                | -5.115488 | 0.000714  |
| 26            | 1             | 0           | 1.241850                | -5.869641 | 0.000351  |
| 27            | 1             | 0           | 0.657695                | 3.349098  | 0.000716  |
| 28            | 6             | 0           | -1.707444               | 2.781930  | 0.000429  |
| 29            | 1             | 0           | -1.509813               | 3.859694  | 0.000670  |
| 30            | 6             | 0           | -3.102360               | 2.405339  | 0.000273  |
| 31            | 6             | 0           | -4.233798               | 3.179023  | 0.000296  |

|    |    |   |           |           |           |
|----|----|---|-----------|-----------|-----------|
| 32 | 8  | 0 | -3.430864 | 1.092638  | 0.000074  |
| 33 | 6  | 0 | -5.333377 | 2.284168  | 0.000103  |
| 34 | 1  | 0 | -4.267461 | 4.258198  | 0.000417  |
| 35 | 6  | 0 | -4.773435 | 1.046829  | 0.000005  |
| 36 | 1  | 0 | -6.389010 | 2.502153  | 0.000076  |
| 37 | 7  | 0 | -5.392343 | -0.240843 | -0.000353 |
| 38 | 8  | 0 | -4.673084 | -1.224159 | -0.000698 |
| 39 | 8  | 0 | -6.618348 | -0.237347 | -0.000270 |
| 40 | 17 | 0 | -1.192944 | -4.398158 | -0.000252 |

-----  
 Rotational constants (GHZ): 0.1781282 0.1039344 0.0656367

Cycle 9 Pass 1 IDiag 1:

RMSU= 6.60D-09 CP: 1.00D+00 1.24D+00 1.31D+00 7.98D-01 1.34D+00

CP: 1.22D+00 9.91D-01 9.61D-01

E= -1690.15325925696 Delta-E= 0.000000000003 Rises=F Damp=F

DIIS: error= 6.32D-08 at cycle 9 NSaved= 9.

NSaved= 9 IEnMin= 8 EnMin= -1690.15325925696 IErMin= 9 ErrMin= 6.32D-08

ErrMax= 6.32D-08 0.00D+00 EMaxC= 1.00D-01 BMatC= 1.13D-12 BMatP= 8.48D-12

IDIUse=1 WtCom= 1.00D+00 WtEn= 0.00D+00

Coeff-Com: -0.471D-04-0.449D-04 0.545D-02 0.117D-02-0.338D-01-0.569D-01

Coeff-Com: -0.308D-02 0.277D+00 0.810D+00

Coeff: -0.471D-04-0.449D-04 0.545D-02 0.117D-02-0.338D-01-0.569D-01

Coeff: -0.308D-02 0.277D+00 0.810D+00

Gap= 0.215 Goal= None Shift= 0.000

RMSDP=5.18D-09 MaxDP=3.67D-07 DE= 2.73D-12 OVMax= 1.47D-06

SCF Done: E(RCAM-B3LYP) = -1690.15325926 A.U. after 9 cycles

NFock= 9 Conv=0.52D-08 -V/T= 2.0072

KE= 1.678102729444D+03 PE=-8.887476039495D+03 EE= 3.053661797712D+03

Leave Link 502 at Fri Sep 9 15:46:30 2022, MaxMem= 2147483648 cpu: 1909.8

(Enter /opt/gaussian/g09/l701.exe)

Compute integral first derivatives.

... and contract with generalized density number 0.

Leave Link 701 at Fri Sep 9 15:46:31 2022, MaxMem= 2147483648 cpu: 7.1

(Enter /opt/gaussian/g09/l702.exe)

L702 exits ... SP integral derivatives will be done elsewhere.

Leave Link 702 at Fri Sep 9 15:46:31 2022, MaxMem= 2147483648 cpu: 0.8

(Enter /opt/gaussian/g09/l703.exe)

Compute integral first derivatives, UseDBF=F ICtDFT= 0.

Integral derivatives from FoFJK, PRISM(SPDF).

Calling FoFJK, ICntrl= 2127 FMM=F ISym2X=0 IICent= 0 IOpClX= 0 NMat=1  
 NMatS=1 NMatT=0.

FoFJK: IHMeth= 1 ICntrl= 2127 DoSepK=T KAlg= 0 IICent= 0 FoldK=F

IRaf= 1 NMat= 1 IRICut= 1 DoRegI=T DoRaff=F ISym2E= 0.

FoFCou: FMM=F IPFlag= 0 FMFlag= 100000 FMFlg1= 800

NFxFlg= 0 DoJE=F BraDBF=F KetDBF=F FulRan=T

wScrn= 0.000000 ICntrl= 2527 IOpCl= 0 IICent= 0 NGrid= 0



NMat0= 1 NMatS0= 1 NMatT0= 0 NMatD0= 1 NMtDS0= 0  
NMtDT0= 0

Symmetry not used in FoFCou.

Leave Link 703 at Fri Sep 9 15:48:19 2022, MaxMem= 2147483648 cpu: 862.2

(Enter /opt/gaussian/g09/l716.exe)

Dipole = 1.49170142D+00 3.71086493D+00 8.55175443D-04

**Orbital energies and kinetic energies (alpha):**

|    |   | 1           | 2          |
|----|---|-------------|------------|
| 1  | O | -101.602777 | 136.916771 |
| 2  | O | -19.328100  | 29.025821  |
| 3  | O | -19.254595  | 29.033119  |
| 4  | O | -19.251739  | 29.033048  |
| 5  | O | -14.658935  | 21.965603  |
| 6  | O | -14.498658  | 21.957511  |
| 7  | O | -14.479119  | 21.963488  |
| 8  | O | -14.404701  | 21.960007  |
| 9  | O | -14.399692  | 21.960624  |
| 10 | O | -10.377404  | 15.880718  |
| 11 | O | -10.369871  | 15.882560  |
| 12 | O | -10.360085  | 15.881430  |
| 13 | O | -10.339279  | 15.881954  |
| 14 | O | -10.335627  | 15.877533  |
| 15 | O | -10.315749  | 15.881245  |
| 16 | O | -10.312815  | 15.882019  |
| 17 | O | -10.305639  | 15.878327  |
| 18 | O | -10.298728  | 15.878922  |
| 19 | O | -10.295537  | 15.874468  |
| 20 | O | -10.294933  | 15.882813  |
| 21 | O | -10.286125  | 15.874414  |
| 22 | O | -10.285537  | 15.884251  |
| 23 | O | -10.276563  | 15.878996  |
| 24 | O | -10.268836  | 15.878511  |
| 25 | O | -10.267099  | 15.878069  |
| 26 | O | -10.263347  | 15.879512  |
| 27 | O | -10.260768  | 15.879081  |
| 28 | O | -10.258005  | 15.879917  |
| 29 | O | -9.519790   | 21.535382  |
| 30 | O | -7.284848   | 20.526569  |
| 31 | O | -7.274988   | 20.553887  |
| 32 | O | -7.274692   | 20.548548  |
| 33 | O | -1.320027   | 2.494469   |
| 34 | O | -1.242483   | 2.495416   |
| 35 | O | -1.146503   | 1.989739   |
| 36 | O | -1.139097   | 2.804901   |
| 37 | O | -1.076260   | 1.831102   |
| 38 | O | -0.995860   | 1.986692   |
| 39 | O | -0.970745   | 1.695496   |
| 40 | O | -0.961234   | 1.888585   |
| 41 | O | -0.939129   | 1.888561   |

|    |   |           |          |
|----|---|-----------|----------|
| 42 | O | -0.929505 | 1.874497 |
| 43 | O | -0.910457 | 2.072107 |
| 44 | O | -0.906828 | 2.035452 |
| 45 | O | -0.866614 | 1.743495 |
| 46 | O | -0.854058 | 1.658498 |
| 47 | O | -0.826954 | 1.687454 |
| 48 | O | -0.814126 | 1.915272 |
| 49 | O | -0.801023 | 2.009617 |
| 50 | O | -0.753161 | 1.724864 |
| 51 | O | -0.747909 | 1.748841 |
| 52 | O | -0.722114 | 1.655991 |
| 53 | O | -0.714617 | 1.794409 |
| 54 | O | -0.702038 | 1.649639 |
| 55 | O | -0.680153 | 1.586950 |
| 56 | O | -0.669641 | 1.604467 |
| 57 | O | -0.664014 | 1.640065 |
| 58 | O | -0.650698 | 1.654233 |
| 59 | O | -0.629104 | 2.198037 |
| 60 | O | -0.623279 | 1.671550 |
| 61 | O | -0.623062 | 1.713983 |
| 62 | O | -0.604983 | 1.690418 |
| 63 | O | -0.597237 | 1.530706 |
| 64 | O | -0.580037 | 1.380287 |
| 65 | O | -0.576995 | 2.459523 |
| 66 | O | -0.561132 | 1.619303 |
| 67 | O | -0.560284 | 1.543730 |
| 68 | O | -0.543881 | 1.466393 |
| 69 | O | -0.542569 | 1.308420 |
| 70 | O | -0.540162 | 1.494314 |
| 71 | O | -0.519924 | 1.532610 |
| 72 | O | -0.518455 | 1.482151 |
| 73 | O | -0.517502 | 1.506984 |
| 74 | O | -0.511737 | 1.511219 |
| 75 | O | -0.506239 | 1.596252 |
| 76 | O | -0.498890 | 1.261597 |
| 77 | O | -0.489210 | 1.442998 |
| 78 | O | -0.482050 | 1.640350 |
| 79 | O | -0.479776 | 2.217922 |
| 80 | O | -0.459710 | 1.044161 |
| 81 | O | -0.455076 | 1.528008 |
| 82 | O | -0.437016 | 1.176005 |
| 83 | O | -0.436996 | 1.440914 |
| 84 | O | -0.417912 | 1.600302 |
| 85 | O | -0.416313 | 1.378040 |
| 86 | O | -0.409139 | 1.587286 |
| 87 | O | -0.386134 | 1.901098 |
| 88 | O | -0.382342 | 1.692325 |
| 89 | O | -0.380502 | 1.609582 |
| 90 | O | -0.376626 | 2.422750 |
| 91 | O | -0.367916 | 2.352817 |

|     |   |           |          |
|-----|---|-----------|----------|
| 92  | O | -0.365418 | 2.054261 |
| 93  | O | -0.360585 | 2.584726 |
| 94  | O | -0.357132 | 2.297171 |
| 95  | O | -0.355705 | 1.408219 |
| 96  | O | -0.338279 | 1.206724 |
| 97  | O | -0.315965 | 1.269288 |
| 98  | O | -0.314150 | 1.961877 |
| 99  | O | -0.294423 | 1.355361 |
| 100 | O | -0.286806 | 1.560806 |
| 101 | O | -0.268779 | 1.524943 |
| 102 | V | -0.053602 | 2.062023 |
| 103 | V | -0.021455 | 1.684945 |
| 104 | V | -0.004301 | 1.548758 |
| 105 | V | 0.015266  | 1.800670 |
| 106 | V | 0.048552  | 1.429914 |
| 107 | V | 0.056159  | 1.465215 |
| 108 | V | 0.086610  | 1.725952 |
| 109 | V | 0.089323  | 1.162632 |
| 110 | V | 0.104953  | 2.050588 |
| 111 | V | 0.106287  | 2.109314 |
| 112 | V | 0.127741  | 1.298752 |
| 113 | V | 0.129548  | 1.674987 |
| 114 | V | 0.146371  | 1.047699 |
| 115 | V | 0.148132  | 1.754115 |
| 116 | V | 0.167072  | 1.304291 |
| 117 | V | 0.176698  | 1.545540 |
| 118 | V | 0.180074  | 1.236259 |
| 119 | V | 0.189320  | 1.197527 |
| 120 | V | 0.201288  | 1.487543 |
| 121 | V | 0.217219  | 1.195523 |
| 122 | V | 0.223525  | 1.758481 |
| 123 | V | 0.229368  | 1.740078 |
| 124 | V | 0.231523  | 1.566163 |
| 125 | V | 0.234458  | 1.772354 |
| 126 | V | 0.241464  | 1.502745 |
| 127 | V | 0.247241  | 1.826772 |
| 128 | V | 0.256285  | 1.623536 |
| 129 | V | 0.268146  | 2.034151 |
| 130 | V | 0.276455  | 1.812620 |
| 131 | V | 0.281237  | 2.451315 |
| 132 | V | 0.301341  | 1.971849 |
| 133 | V | 0.314129  | 2.284386 |
| 134 | V | 0.317189  | 2.218168 |
| 135 | V | 0.325576  | 2.081622 |
| 136 | V | 0.330312  | 2.265332 |
| 137 | V | 0.340789  | 1.941160 |
| 138 | V | 0.345308  | 1.760370 |
| 139 | V | 0.356673  | 1.929137 |
| 140 | V | 0.361110  | 1.817597 |
| 141 | V | 0.381989  | 1.823396 |

|     |   |          |          |
|-----|---|----------|----------|
| 142 | V | 0.394635 | 2.082522 |
| 143 | V | 0.405066 | 2.175180 |
| 144 | V | 0.407875 | 2.217107 |
| 145 | V | 0.410946 | 2.345358 |
| 146 | V | 0.431701 | 2.484860 |
| 147 | V | 0.435508 | 2.005445 |
| 148 | V | 0.442797 | 1.932130 |
| 149 | V | 0.468990 | 2.038527 |
| 150 | V | 0.476440 | 2.247252 |
| 151 | V | 0.483799 | 2.511905 |
| 152 | V | 0.487622 | 2.349588 |
| 153 | V | 0.498049 | 2.289486 |
| 154 | V | 0.511119 | 2.496503 |
| 155 | V | 0.517035 | 2.597145 |
| 156 | V | 0.531804 | 1.994786 |
| 157 | V | 0.542497 | 2.017664 |
| 158 | V | 0.543146 | 2.118433 |
| 159 | V | 0.547168 | 2.001170 |
| 160 | V | 0.558108 | 2.368992 |
| 161 | V | 0.567627 | 2.197127 |
| 162 | V | 0.576792 | 2.085678 |
| 163 | V | 0.578036 | 2.437672 |
| 164 | V | 0.580039 | 2.040790 |
| 165 | V | 0.593033 | 1.981532 |
| 166 | V | 0.594258 | 2.044870 |
| 167 | V | 0.601684 | 2.298172 |
| 168 | V | 0.604379 | 2.369854 |
| 169 | V | 0.617887 | 2.506387 |
| 170 | V | 0.619543 | 2.102033 |
| 171 | V | 0.621210 | 2.638432 |
| 172 | V | 0.623153 | 2.549543 |
| 173 | V | 0.632794 | 2.099614 |
| 174 | V | 0.638175 | 2.144767 |
| 175 | V | 0.638363 | 2.107494 |
| 176 | V | 0.640177 | 2.460724 |
| 177 | V | 0.646069 | 2.517523 |
| 178 | V | 0.648549 | 2.065959 |
| 179 | V | 0.653123 | 2.034206 |
| 180 | V | 0.655756 | 2.301820 |
| 181 | V | 0.661492 | 2.177150 |
| 182 | V | 0.661866 | 2.189008 |
| 183 | V | 0.667377 | 2.674507 |
| 184 | V | 0.668027 | 2.116457 |
| 185 | V | 0.673326 | 2.441010 |
| 186 | V | 0.674365 | 2.221247 |
| 187 | V | 0.680248 | 2.178428 |
| 188 | V | 0.681701 | 2.192105 |
| 189 | V | 0.692329 | 2.172758 |
| 190 | V | 0.697556 | 2.576324 |
| 191 | V | 0.706842 | 2.882337 |

|     |   |          |          |
|-----|---|----------|----------|
| 192 | V | 0.710690 | 2.344140 |
| 193 | V | 0.716560 | 2.284383 |
| 194 | V | 0.726314 | 2.251033 |
| 195 | V | 0.734899 | 2.892076 |
| 196 | V | 0.737771 | 2.311713 |
| 197 | V | 0.752129 | 3.113084 |
| 198 | V | 0.769622 | 2.728639 |
| 199 | V | 0.790073 | 2.308559 |
| 200 | V | 0.802375 | 2.475429 |
| 201 | V | 0.812103 | 2.562373 |
| 202 | V | 0.823287 | 2.430900 |
| 203 | V | 0.823593 | 2.624341 |
| 204 | V | 0.833844 | 2.577066 |
| 205 | V | 0.835902 | 2.714001 |
| 206 | V | 0.837548 | 2.629269 |
| 207 | V | 0.842500 | 2.388076 |
| 208 | V | 0.845972 | 2.690378 |
| 209 | V | 0.851483 | 2.484477 |
| 210 | V | 0.865098 | 2.627238 |
| 211 | V | 0.869333 | 2.613327 |
| 212 | V | 0.869892 | 2.508054 |
| 213 | V | 0.872088 | 2.569476 |
| 214 | V | 0.880917 | 2.736562 |
| 215 | V | 0.886679 | 2.810845 |
| 216 | V | 0.889539 | 2.587051 |
| 217 | V | 0.898458 | 2.433624 |
| 218 | V | 0.905889 | 2.458170 |
| 219 | V | 0.918548 | 2.702001 |
| 220 | V | 0.919835 | 2.457862 |
| 221 | V | 0.928753 | 2.560247 |
| 222 | V | 0.942064 | 2.496679 |
| 223 | V | 0.950830 | 2.595588 |
| 224 | V | 0.953473 | 2.419334 |
| 225 | V | 0.958897 | 2.586064 |
| 226 | V | 0.964364 | 2.622135 |
| 227 | V | 0.968740 | 2.603234 |
| 228 | V | 0.979964 | 2.670578 |
| 229 | V | 0.984925 | 2.592076 |
| 230 | V | 0.987316 | 3.402379 |
| 231 | V | 0.996665 | 2.565571 |
| 232 | V | 1.002181 | 2.509355 |
| 233 | V | 1.011214 | 2.604332 |
| 234 | V | 1.022550 | 2.629384 |
| 235 | V | 1.024176 | 2.581147 |
| 236 | V | 1.028650 | 2.731907 |
| 237 | V | 1.037099 | 2.573028 |
| 238 | V | 1.041464 | 2.535741 |
| 239 | V | 1.053619 | 3.385518 |
| 240 | V | 1.058342 | 2.474262 |
| 241 | V | 1.068781 | 2.345941 |

|     |   |          |          |
|-----|---|----------|----------|
| 242 | V | 1.074578 | 2.633978 |
| 243 | V | 1.086442 | 3.257098 |
| 244 | V | 1.092720 | 2.560269 |
| 245 | V | 1.099709 | 2.597942 |
| 246 | V | 1.121241 | 2.359391 |
| 247 | V | 1.134655 | 2.564676 |
| 248 | V | 1.139891 | 2.463018 |
| 249 | V | 1.148292 | 2.436845 |
| 250 | V | 1.153370 | 2.503829 |
| 251 | V | 1.172192 | 2.478288 |
| 252 | V | 1.181881 | 2.859395 |
| 253 | V | 1.199628 | 2.875109 |
| 254 | V | 1.210784 | 2.502374 |
| 255 | V | 1.227830 | 2.681705 |
| 256 | V | 1.239339 | 2.471177 |
| 257 | V | 1.266627 | 2.685960 |
| 258 | V | 1.271032 | 2.398659 |
| 259 | V | 1.273062 | 2.596113 |
| 260 | V | 1.279178 | 2.578884 |
| 261 | V | 1.280308 | 2.391833 |
| 262 | V | 1.288442 | 2.399382 |
| 263 | V | 1.305918 | 2.624537 |
| 264 | V | 1.324264 | 2.697319 |
| 265 | V | 1.325849 | 2.412613 |
| 266 | V | 1.335867 | 2.673569 |
| 267 | V | 1.344158 | 2.483559 |
| 268 | V | 1.346924 | 2.734598 |
| 269 | V | 1.358126 | 2.488737 |
| 270 | V | 1.365829 | 2.458041 |
| 271 | V | 1.368037 | 2.594421 |
| 272 | V | 1.368374 | 2.509328 |
| 273 | V | 1.384416 | 2.499829 |
| 274 | V | 1.390247 | 2.500991 |
| 275 | V | 1.398292 | 2.828189 |
| 276 | V | 1.399355 | 2.454920 |
| 277 | V | 1.414312 | 2.800793 |
| 278 | V | 1.441740 | 2.495497 |
| 279 | V | 1.442691 | 2.672532 |
| 280 | V | 1.447533 | 2.514441 |
| 281 | V | 1.454130 | 2.544527 |
| 282 | V | 1.463722 | 2.654830 |
| 283 | V | 1.465515 | 2.546920 |
| 284 | V | 1.471607 | 2.669239 |
| 285 | V | 1.477088 | 2.614331 |
| 286 | V | 1.484279 | 2.552324 |
| 287 | V | 1.486965 | 2.748145 |
| 288 | V | 1.487829 | 2.538868 |
| 289 | V | 1.517515 | 2.713605 |
| 290 | V | 1.528679 | 2.729052 |
| 291 | V | 1.528836 | 2.624386 |

|     |   |          |          |
|-----|---|----------|----------|
| 292 | V | 1.551848 | 2.826626 |
| 293 | V | 1.567744 | 2.794620 |
| 294 | V | 1.570640 | 2.686246 |
| 295 | V | 1.587451 | 2.817391 |
| 296 | V | 1.598033 | 2.699686 |
| 297 | V | 1.601328 | 3.031654 |
| 298 | V | 1.623212 | 2.770704 |
| 299 | V | 1.652190 | 2.969993 |
| 300 | V | 1.661303 | 2.965631 |
| 301 | V | 1.678351 | 3.185484 |
| 302 | V | 1.682745 | 2.731881 |
| 303 | V | 1.710381 | 3.077425 |
| 304 | V | 1.720219 | 3.034184 |
| 305 | V | 1.781148 | 2.841718 |
| 306 | V | 1.796581 | 3.015187 |
| 307 | V | 1.802670 | 3.167932 |
| 308 | V | 1.824260 | 2.911658 |
| 309 | V | 1.828145 | 3.093904 |
| 310 | V | 1.842601 | 3.163632 |
| 311 | V | 1.856620 | 3.147982 |
| 312 | V | 1.869289 | 3.204525 |
| 313 | V | 1.871954 | 2.937867 |
| 314 | V | 1.873391 | 3.357701 |
| 315 | V | 1.876008 | 3.165452 |
| 316 | V | 1.877785 | 2.862033 |
| 317 | V | 1.889352 | 3.272655 |
| 318 | V | 1.889830 | 3.171190 |
| 319 | V | 1.893876 | 2.968331 |
| 320 | V | 1.910912 | 3.194229 |
| 321 | V | 1.934873 | 3.231622 |
| 322 | V | 1.942785 | 3.271881 |
| 323 | V | 1.951787 | 3.192620 |
| 324 | V | 1.958325 | 3.166343 |
| 325 | V | 1.963082 | 3.437927 |
| 326 | V | 1.971747 | 3.313471 |
| 327 | V | 1.973706 | 3.042034 |
| 328 | V | 1.975557 | 3.278514 |
| 329 | V | 1.984360 | 3.093631 |
| 330 | V | 1.986391 | 3.379272 |
| 331 | V | 2.002401 | 3.509433 |
| 332 | V | 2.018640 | 3.095110 |
| 333 | V | 2.018978 | 3.471549 |
| 334 | V | 2.035609 | 3.148625 |
| 335 | V | 2.039035 | 3.403762 |
| 336 | V | 2.050522 | 3.459013 |
| 337 | V | 2.052841 | 2.994282 |
| 338 | V | 2.058905 | 3.024195 |
| 339 | V | 2.065559 | 3.508252 |
| 340 | V | 2.074597 | 3.421433 |
| 341 | V | 2.089568 | 3.522390 |

|     |   |          |          |
|-----|---|----------|----------|
| 342 | V | 2.109418 | 3.370867 |
| 343 | V | 2.121288 | 3.450060 |
| 344 | V | 2.122765 | 3.193827 |
| 345 | V | 2.134585 | 3.216961 |
| 346 | V | 2.141486 | 3.502721 |
| 347 | V | 2.144808 | 3.417284 |
| 348 | V | 2.162271 | 3.160034 |
| 349 | V | 2.164021 | 3.803515 |
| 350 | V | 2.171712 | 3.498011 |
| 351 | V | 2.188584 | 3.665835 |
| 352 | V | 2.213861 | 3.804877 |
| 353 | V | 2.215160 | 3.362093 |
| 354 | V | 2.229319 | 3.596310 |
| 355 | V | 2.235991 | 3.350790 |
| 356 | V | 2.245768 | 3.382288 |
| 357 | V | 2.272133 | 3.705878 |
| 358 | V | 2.278705 | 3.763000 |
| 359 | V | 2.299592 | 3.481122 |
| 360 | V | 2.310081 | 3.800884 |
| 361 | V | 2.319212 | 3.427945 |
| 362 | V | 2.331787 | 3.921386 |
| 363 | V | 2.332215 | 3.501490 |
| 364 | V | 2.341342 | 3.513341 |
| 365 | V | 2.371892 | 3.543600 |
| 366 | V | 2.378679 | 3.530738 |
| 367 | V | 2.378852 | 3.913383 |
| 368 | V | 2.386986 | 3.531528 |
| 369 | V | 2.406107 | 3.528846 |
| 370 | V | 2.409768 | 3.812922 |
| 371 | V | 2.416100 | 3.816413 |
| 372 | V | 2.424410 | 3.821458 |
| 373 | V | 2.433587 | 3.862201 |
| 374 | V | 2.433665 | 3.379214 |
| 375 | V | 2.444809 | 3.376013 |
| 376 | V | 2.451299 | 3.676611 |
| 377 | V | 2.457134 | 3.425124 |
| 378 | V | 2.473723 | 3.706283 |
| 379 | V | 2.479161 | 3.769552 |
| 380 | V | 2.479525 | 3.382868 |
| 381 | V | 2.498243 | 3.576565 |
| 382 | V | 2.509822 | 3.950816 |
| 383 | V | 2.514843 | 3.632610 |
| 384 | V | 2.523927 | 3.882575 |
| 385 | V | 2.529715 | 3.542426 |
| 386 | V | 2.530066 | 3.862537 |
| 387 | V | 2.555705 | 3.951982 |
| 388 | V | 2.576173 | 3.879097 |
| 389 | V | 2.585956 | 3.766595 |
| 390 | V | 2.596585 | 4.052747 |
| 391 | V | 2.607235 | 3.597909 |



|     |   |          |          |
|-----|---|----------|----------|
| 392 | V | 2.613201 | 4.002217 |
| 393 | V | 2.618239 | 4.177173 |
| 394 | V | 2.618285 | 3.658739 |
| 395 | V | 2.633903 | 4.082745 |
| 396 | V | 2.639361 | 4.023374 |
| 397 | V | 2.641616 | 3.634281 |
| 398 | V | 2.660138 | 3.647325 |
| 399 | V | 2.672984 | 4.003358 |
| 400 | V | 2.687909 | 3.891696 |
| 401 | V | 2.688807 | 4.086050 |
| 402 | V | 2.693433 | 3.839288 |
| 403 | V | 2.711010 | 4.033872 |
| 404 | V | 2.737666 | 3.947552 |
| 405 | V | 2.739709 | 4.412580 |
| 406 | V | 2.745136 | 4.315583 |
| 407 | V | 2.760331 | 4.302399 |
| 408 | V | 2.764101 | 3.919286 |
| 409 | V | 2.773449 | 4.414079 |
| 410 | V | 2.776103 | 3.856283 |
| 411 | V | 2.779020 | 3.918791 |
| 412 | V | 2.797566 | 4.348446 |
| 413 | V | 2.801605 | 4.349507 |
| 414 | V | 2.802860 | 3.984895 |
| 415 | V | 2.807841 | 3.846994 |
| 416 | V | 2.839988 | 4.386617 |
| 417 | V | 2.843596 | 4.397052 |
| 418 | V | 2.858910 | 4.455457 |
| 419 | V | 2.868176 | 4.069114 |
| 420 | V | 2.887563 | 4.453862 |
| 421 | V | 2.890191 | 4.574633 |
| 422 | V | 2.909650 | 4.569981 |
| 423 | V | 2.937065 | 4.648879 |
| 424 | V | 2.953260 | 4.915138 |
| 425 | V | 2.958787 | 4.475619 |
| 426 | V | 2.968464 | 5.092973 |
| 427 | V | 2.973486 | 4.892788 |
| 428 | V | 2.989622 | 4.654729 |
| 429 | V | 3.000888 | 4.686941 |
| 430 | V | 3.051010 | 4.637612 |
| 431 | V | 3.064012 | 4.451559 |
| 432 | V | 3.093669 | 4.866637 |
| 433 | V | 3.142385 | 4.770533 |
| 434 | V | 3.143251 | 4.828580 |
| 435 | V | 3.176948 | 5.012661 |
| 436 | V | 3.218345 | 4.869423 |
| 437 | V | 3.234409 | 4.920076 |
| 438 | V | 3.266043 | 5.030604 |
| 439 | V | 3.286648 | 4.996523 |
| 440 | V | 3.297476 | 4.927552 |
| 441 | V | 3.309162 | 4.984564 |

|     |   |          |           |
|-----|---|----------|-----------|
| 442 | V | 3.321217 | 4.873802  |
| 443 | V | 3.329451 | 4.892476  |
| 444 | V | 3.362635 | 5.214880  |
| 445 | V | 3.405017 | 5.092327  |
| 446 | V | 3.429192 | 5.330060  |
| 447 | V | 3.481136 | 5.186519  |
| 448 | V | 3.485736 | 5.262529  |
| 449 | V | 3.534812 | 5.421496  |
| 450 | V | 3.541321 | 5.351049  |
| 451 | V | 3.582122 | 5.491304  |
| 452 | V | 3.600104 | 5.693946  |
| 453 | V | 3.681917 | 5.963215  |
| 454 | V | 3.765339 | 8.468520  |
| 455 | V | 3.786931 | 7.846000  |
| 456 | V | 3.908860 | 6.181351  |
| 457 | V | 3.931456 | 6.328976  |
| 458 | V | 3.936088 | 9.909790  |
| 459 | V | 3.973326 | 9.990463  |
| 460 | V | 4.081783 | 10.395491 |
| 461 | V | 4.129339 | 10.210384 |
| 462 | V | 4.157021 | 10.170606 |
| 463 | V | 4.174269 | 10.405650 |
| 464 | V | 4.183294 | 10.070858 |
| 465 | V | 4.193280 | 10.125157 |
| 466 | V | 4.206611 | 10.139694 |
| 467 | V | 4.215647 | 10.100304 |
| 468 | V | 4.224822 | 10.175360 |
| 469 | V | 4.268317 | 10.190985 |
| 470 | V | 4.363832 | 11.016767 |
| 471 | V | 4.369031 | 11.689773 |
| 472 | V | 4.380460 | 10.665410 |
| 473 | V | 4.393712 | 10.018088 |
| 474 | V | 4.432714 | 10.628193 |
| 475 | V | 4.496394 | 10.904119 |
| 476 | V | 4.503932 | 10.460502 |
| 477 | V | 4.516726 | 10.299393 |
| 478 | V | 4.566087 | 10.414325 |
| 479 | V | 4.586425 | 11.130217 |
| 480 | V | 4.632824 | 10.060846 |
| 481 | V | 4.776534 | 11.087344 |
| 482 | V | 4.827175 | 10.330951 |
| 483 | V | 4.879368 | 10.281641 |
| 484 | V | 4.955005 | 10.270800 |

Total kinetic energy from orbitals= 1.678102681267D+03

9.6. (*E*)-4-(2-((5-nitrofur-2-yl)methylene)hydrazineyl)-2-(3-chlorophenyl)quinazoline **3f** in complex with Zn(II)

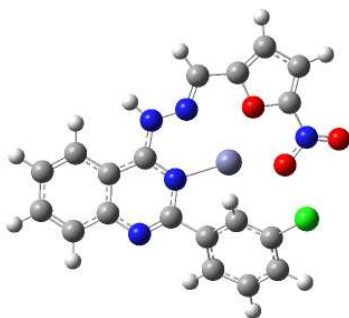

**Standard orientation:**

| Center Number | Atomic Number | Atomic Type | Coordinates (Angstroms) |           |           |
|---------------|---------------|-------------|-------------------------|-----------|-----------|
|               |               |             | X                       | Y         | Z         |
| 1             | 6             | 0           | -5.873915               | -1.518125 | -0.142860 |
| 2             | 6             | 0           | -4.547035               | -1.852928 | -0.222560 |
| 3             | 6             | 0           | -3.562851               | -0.844341 | -0.100751 |
| 4             | 6             | 0           | -3.958530               | 0.511825  | 0.097213  |
| 5             | 6             | 0           | -5.327814               | 0.823181  | 0.176432  |
| 6             | 6             | 0           | -6.263934               | -0.175467 | 0.059747  |
| 7             | 1             | 0           | -6.632558               | -2.286833 | -0.236767 |
| 8             | 1             | 0           | -4.277217               | -2.892514 | -0.379142 |
| 9             | 6             | 0           | -2.164926               | -1.067513 | -0.126944 |
| 10            | 1             | 0           | -5.608097               | 1.859564  | 0.322692  |
| 11            | 1             | 0           | -7.319767               | 0.066032  | 0.118890  |
| 12            | 6             | 0           | -1.796261               | 1.222679  | 0.119713  |
| 13            | 7             | 0           | -3.047325               | 1.530603  | 0.188371  |
| 14            | 7             | 0           | -1.307961               | -0.062919 | 0.012569  |
| 15            | 7             | 0           | -1.611264               | -2.322848 | -0.287933 |
| 16            | 7             | 0           | -0.280827               | -2.399549 | -0.237989 |
| 17            | 6             | 0           | -0.722395               | 2.243166  | 0.145768  |
| 18            | 6             | 0           | 0.419907                | 2.029399  | -0.666854 |
| 19            | 6             | 0           | -0.781382               | 3.347840  | 0.981743  |
| 20            | 6             | 0           | 1.487816                | 2.935388  | -0.606345 |
| 21            | 1             | 0           | 0.339425                | 1.402743  | -1.560708 |
| 22            | 6             | 0           | 0.298940                | 4.228772  | 1.026864  |
| 23            | 1             | 0           | -1.659652               | 3.509687  | 1.595869  |
| 24            | 6             | 0           | 1.439321                | 4.023246  | 0.255912  |
| 25            | 1             | 0           | 0.256357                | 5.090917  | 1.684200  |
| 26            | 1             | 0           | 2.271104                | 4.716650  | 0.300070  |
| 27            | 1             | 0           | -2.190082               | -3.146559 | -0.405165 |
| 28            | 6             | 0           | 0.414219                | -3.470603 | -0.363980 |
| 29            | 1             | 0           | 0.024423                | -4.470206 | -0.548323 |
| 30            | 6             | 0           | 1.839311                | -3.233411 | -0.185262 |
| 31            | 6             | 0           | 3.023976                | -3.909488 | -0.118635 |
| 32            | 8             | 0           | 2.075043                | -1.912945 | 0.079464  |
| 33            | 6             | 0           | 4.040347                | -2.958003 | 0.226083  |
| 34            | 1             | 0           | 3.173254                | -4.968603 | -0.277073 |

|    |    |   |          |           |           |
|----|----|---|----------|-----------|-----------|
| 35 | 6  | 0 | 3.392605 | -1.769889 | 0.338096  |
| 36 | 1  | 0 | 5.094004 | -3.145570 | 0.382262  |
| 37 | 7  | 0 | 3.679719 | -0.438947 | 0.723333  |
| 38 | 8  | 0 | 2.675955 | 0.336678  | 0.780738  |
| 39 | 8  | 0 | 4.800150 | -0.108384 | 0.980649  |
| 40 | 17 | 0 | 2.844888 | 2.706545  | -1.647541 |
| 41 | 30 | 0 | 0.719525 | -0.193604 | 0.137862  |

-----  
Rotational constants (GHZ): 0.2187655 0.1235568 0.0836900

Cycle 8 Pass 1 IDiag 1:

RMSU= 2.14D-08 CP: 1.00D+00 1.04D+00 7.04D-01 1.08D+00 7.27D-01  
E= -1690.08311289256 Delta-E= -0.00000000226 Rises=F Damp=F  
DIIS: error= 8.55D-08 at cycle 6 NSaved= 6.  
NSaved= 6 IEnMin= 6 EnMin= -1690.08311289256 IErMin= 6 ErrMin= 8.55D-08  
ErrMax= 8.55D-08 0.00D+00 EMaxC= 1.00D-01 BMatC= 2.67D-12 BMatP= 1.60D-10  
IDIUse=1 WtCom= 1.00D+00 WtEn= 0.00D+00  
Coeff-Com: 0.555D-03-0.191D-01-0.557D-02 0.849D-01 0.136D+00 0.803D+00  
Coeff: 0.555D-03-0.191D-01-0.557D-02 0.849D-01 0.136D+00 0.803D+00  
Gap= 0.222 Goal= None Shift= 0.000  
RMSDP=8.22D-09 MaxDP=4.20D-07 DE=-2.26D-10 OVMax= 1.48D-06

SCF Done: E(RCAM-B3LYP) = -1690.08311289 A.U. after 8 cycles  
NFock= 8 Conv=0.82D-08 -V/T= 2.0051  
KE= 1.681516923743D+03 PE=-9.160933961420D+03 EE= 3.189679730761D+03  
Leave Link 502 at Fri Oct 14 11:38:21 2022, MaxMem= 2147483648 cpu: 1277.6  
(Enter /opt/gaussian/g09/l701.exe)  
Compute integral first derivatives.  
... and contract with generalized density number 0.  
Leave Link 701 at Fri Oct 14 11:38:22 2022, MaxMem= 2147483648 cpu: 5.0  
(Enter /opt/gaussian/g09/l702.exe)  
L702 exits ... SP integral derivatives will be done elsewhere.  
Leave Link 702 at Fri Oct 14 11:38:22 2022, MaxMem= 2147483648 cpu: 0.8  
(Enter /opt/gaussian/g09/l703.exe)  
Compute integral first derivatives, UseDBF=F ICtDFT= 0.  
Integral derivatives from FoFJK, PRISM(SPFD).  
Calling FoFJK, ICntrl= 2127 FMM=F ISym2X=0 IICent= 0 IOpCIX= 0 NMat=1  
NMatS=1 NMatT=0.  
FoFJK: IHMeth= 1 ICntrl= 2127 DoSepK=T KAlg= 0 IICent= 0 FoldK=F  
IRaf= 1 NMat= 1 IRICut= 1 DoRegI=T DoRafI=F ISym2E= 0.  
FoFCou: FMM=F IPFlag= 0 FMFlag= 100000 FMFlg1= 800  
NFxFlg= 0 DoJE=F BraDBF=F KetDBF=F FulRan=T  
wScrn= 0.000000 ICntrl= 2527 IOpCl= 0 IICent= 0 NGrid= 0  
NMat0= 1 NMatS0= 1 NMatT0= 0 NMatD0= 1 NMtDS0= 0  
NMtDT0= 0  
Symmetry not used in FoFCou.  
Leave Link 703 at Fri Oct 14 11:40:08 2022, MaxMem= 2147483648 cpu: 843.6  
(Enter /opt/gaussian/g09/l716.exe)

Dipole =-1.77793373D+00-3.04933610D+00-2.33034480D-01  
 \*\*\*\*\* Axes restored to original set \*\*\*\*\*  
 Cartesian Forces: Max 0.075219074 RMS 0.012454398  
 Leave Link 716 at Fri Oct 14 11:40:08 2022, MaxMem= 2147483648 cpu: 0.8  
 (Enter /opt/gaussian/g09/1122.exe)  
 CPIOFr: IOpCl= 0 IRwI=-1 IRwCP= 731 ICalc= 4 LCPTot= 350968 Len1MO=  
 908432 IndFrg= 4893128  
 Restoring MOs from calculation 1 to rwf.  
 CPIOFr: IOpCl= 0 IRwI=-2 IRwCP= 731 ICalc= 0 LCPTot= 350968 Len1MO=  
 908432 IndFrg= 1259400  
 Counterpoise corrected energy = -1755.156462399315  
 BSSE energy = 0.012354005752  
 sum of monomers = -1754.662432222770  
 complexation energy = -317.76 kcal/mole (raw)  
**complexation energy = -310.01 kcal/mole (corrected)**  
 Leave Link 122 at Fri Oct 14 11:40:08 2022, MaxMem= 2147483648 cpu: 0.4  
 (Enter /opt/gaussian/g09/1716.exe)

**Orbital energies and kinetic energies (alpha):**

|    |   | 1           | 2          |
|----|---|-------------|------------|
| 1  | O | -101.812887 | 137.071065 |
| 2  | O | -19.603997  | 29.117157  |
| 3  | O | -19.543568  | 29.122529  |
| 4  | O | -19.536769  | 29.122024  |
| 5  | O | -14.935955  | 22.048972  |
| 6  | O | -14.755311  | 22.046333  |
| 7  | O | -14.752193  | 22.049342  |
| 8  | O | -14.692480  | 22.049082  |
| 9  | O | -14.638673  | 22.049839  |
| 10 | O | -10.642509  | 15.949617  |
| 11 | O | -10.625519  | 15.952561  |
| 12 | O | -10.621034  | 15.952266  |
| 13 | O | -10.599284  | 15.951736  |
| 14 | O | -10.582951  | 15.952938  |
| 15 | O | -10.565321  | 15.953704  |
| 16 | O | -10.555047  | 15.958512  |
| 17 | O | -10.550197  | 15.953292  |
| 18 | O | -10.536653  | 15.954301  |
| 19 | O | -10.522649  | 15.954662  |
| 20 | O | -10.518066  | 15.953630  |
| 21 | O | -10.514410  | 15.953115  |
| 22 | O | -10.497219  | 15.953481  |
| 23 | O | -10.495718  | 15.954230  |
| 24 | O | -10.490687  | 15.953212  |
| 25 | O | -10.490023  | 15.953206  |
| 26 | O | -10.482407  | 15.954725  |
| 27 | O | -10.481597  | 15.953211  |
| 28 | O | -10.473689  | 15.952980  |
| 29 | O | -9.745017   | 21.703139  |
| 30 | O | -7.509661   | 20.522876  |

|    |   |           |           |
|----|---|-----------|-----------|
| 31 | O | -7.499341 | 20.549741 |
| 32 | O | -7.498889 | 20.545554 |
| 33 | O | -1.601160 | 2.486054  |
| 34 | O | -1.521732 | 2.499071  |
| 35 | O | -1.417778 | 2.740973  |
| 36 | O | -1.412255 | 2.029353  |
| 37 | O | -1.330217 | 1.848801  |
| 38 | O | -1.253064 | 1.924891  |
| 39 | O | -1.218106 | 1.968707  |
| 40 | O | -1.205623 | 1.808241  |
| 41 | O | -1.191792 | 2.004610  |
| 42 | O | -1.183191 | 1.791344  |
| 43 | O | -1.164821 | 1.843439  |
| 44 | O | -1.146108 | 2.068596  |
| 45 | O | -1.103616 | 1.747029  |
| 46 | O | -1.085130 | 1.820434  |
| 47 | O | -1.064747 | 1.904810  |
| 48 | O | -1.057445 | 1.838220  |
| 49 | O | -1.037566 | 2.003157  |
| 50 | O | -1.011650 | 6.242669  |
| 51 | O | -1.009193 | 7.415358  |
| 52 | O | -1.004202 | 3.815976  |
| 53 | O | -1.001016 | 9.973498  |
| 54 | O | -0.997933 | 11.007738 |
| 55 | O | -0.996003 | 10.937204 |
| 56 | O | -0.988819 | 6.921206  |
| 57 | O | -0.976377 | 2.342189  |
| 58 | O | -0.956647 | 2.028668  |
| 59 | O | -0.939697 | 2.562982  |
| 60 | O | -0.933323 | 2.030697  |
| 61 | O | -0.923714 | 2.604952  |
| 62 | O | -0.913877 | 1.690690  |
| 63 | O | -0.900769 | 1.756778  |
| 64 | O | -0.899449 | 1.761761  |
| 65 | O | -0.892775 | 1.805730  |
| 66 | O | -0.865823 | 1.820185  |
| 67 | O | -0.856573 | 2.550661  |
| 68 | O | -0.845717 | 1.490854  |
| 69 | O | -0.835539 | 1.776785  |
| 70 | O | -0.829327 | 1.621523  |
| 71 | O | -0.817630 | 1.501434  |
| 72 | O | -0.814370 | 1.537280  |
| 73 | O | -0.803320 | 1.411634  |
| 74 | O | -0.781294 | 1.915821  |
| 75 | O | -0.774227 | 1.519157  |
| 76 | O | -0.768070 | 1.482456  |
| 77 | O | -0.766226 | 1.484767  |
| 78 | O | -0.762563 | 1.532581  |
| 79 | O | -0.753595 | 1.544131  |
| 80 | O | -0.745329 | 1.383168  |

|     |   |           |          |
|-----|---|-----------|----------|
| 81  | O | -0.743548 | 1.452991 |
| 82  | O | -0.724373 | 1.498480 |
| 83  | O | -0.721425 | 1.317189 |
| 84  | O | -0.719092 | 1.682563 |
| 85  | O | -0.709903 | 1.424914 |
| 86  | O | -0.692603 | 1.457233 |
| 87  | O | -0.670834 | 2.394125 |
| 88  | O | -0.666832 | 1.378758 |
| 89  | O | -0.661224 | 1.677655 |
| 90  | O | -0.657170 | 1.657113 |
| 91  | O | -0.656265 | 2.000411 |
| 92  | O | -0.653512 | 1.556602 |
| 93  | O | -0.647068 | 2.110150 |
| 94  | O | -0.644586 | 2.027957 |
| 95  | O | -0.637381 | 1.530113 |
| 96  | O | -0.635677 | 1.620426 |
| 97  | O | -0.633447 | 1.770671 |
| 98  | O | -0.613713 | 1.750582 |
| 99  | O | -0.606152 | 1.503400 |
| 100 | O | -0.585368 | 2.376664 |
| 101 | O | -0.565149 | 1.602637 |
| 102 | O | -0.562287 | 1.682675 |
| 103 | O | -0.552733 | 1.398774 |
| 104 | O | -0.535429 | 1.366023 |
| 105 | O | -0.526665 | 1.563282 |
| 106 | O | -0.502476 | 1.399955 |
| 107 | V | -0.333074 | 2.061992 |
| 108 | V | -0.275452 | 1.833556 |
| 109 | V | -0.264911 | 1.398739 |
| 110 | V | -0.235941 | 1.585564 |
| 111 | V | -0.229164 | 1.623932 |
| 112 | V | -0.207872 | 0.911147 |
| 113 | V | -0.192640 | 1.198975 |
| 114 | V | -0.171484 | 1.443377 |
| 115 | V | -0.162473 | 1.997052 |
| 116 | V | -0.147806 | 0.915505 |
| 117 | V | -0.142912 | 1.243508 |
| 118 | V | -0.138228 | 0.894608 |
| 119 | V | -0.124305 | 1.681640 |
| 120 | V | -0.118622 | 1.010277 |
| 121 | V | -0.113016 | 2.008316 |
| 122 | V | -0.097557 | 1.719128 |
| 123 | V | -0.089449 | 1.492081 |
| 124 | V | -0.083342 | 2.133885 |
| 125 | V | -0.067229 | 0.995885 |
| 126 | V | -0.061707 | 1.277345 |
| 127 | V | -0.043457 | 1.415485 |
| 128 | V | -0.036777 | 1.182339 |
| 129 | V | -0.027141 | 1.576391 |
| 130 | V | -0.023333 | 2.374896 |

|     |   |           |          |
|-----|---|-----------|----------|
| 131 | V | -0.018767 | 1.070441 |
| 132 | V | -0.016111 | 1.558728 |
| 133 | V | -0.003382 | 1.866687 |
| 134 | V | 0.000763  | 1.762736 |
| 135 | V | 0.013101  | 1.445618 |
| 136 | V | 0.019913  | 1.447154 |
| 137 | V | 0.024156  | 1.786462 |
| 138 | V | 0.028907  | 1.910225 |
| 139 | V | 0.035921  | 1.837438 |
| 140 | V | 0.037420  | 1.781571 |
| 141 | V | 0.046592  | 1.322365 |
| 142 | V | 0.057675  | 1.558453 |
| 143 | V | 0.063254  | 1.807956 |
| 144 | V | 0.072120  | 2.195624 |
| 145 | V | 0.077187  | 1.878478 |
| 146 | V | 0.085235  | 2.118622 |
| 147 | V | 0.095523  | 2.266139 |
| 148 | V | 0.107323  | 2.073993 |
| 149 | V | 0.110541  | 1.805483 |
| 150 | V | 0.127491  | 1.971612 |
| 151 | V | 0.129566  | 1.570556 |
| 152 | V | 0.138500  | 2.081246 |
| 153 | V | 0.146200  | 2.191748 |
| 154 | V | 0.152663  | 2.082183 |
| 155 | V | 0.161965  | 2.216854 |
| 156 | V | 0.167187  | 2.012138 |
| 157 | V | 0.184407  | 1.859087 |
| 158 | V | 0.188844  | 2.289674 |
| 159 | V | 0.197232  | 1.931469 |
| 160 | V | 0.212153  | 2.210175 |
| 161 | V | 0.230340  | 2.167304 |
| 162 | V | 0.240123  | 2.112706 |
| 163 | V | 0.247428  | 1.973620 |
| 164 | V | 0.258679  | 2.183495 |
| 165 | V | 0.271097  | 2.390130 |
| 166 | V | 0.286819  | 2.709933 |
| 167 | V | 0.297014  | 2.401446 |
| 168 | V | 0.307029  | 2.127136 |
| 169 | V | 0.309596  | 2.027912 |
| 170 | V | 0.320489  | 2.220911 |
| 171 | V | 0.326763  | 2.112643 |
| 172 | V | 0.335123  | 2.157091 |
| 173 | V | 0.340841  | 2.468270 |
| 174 | V | 0.342962  | 2.528509 |
| 175 | V | 0.354584  | 2.321286 |
| 176 | V | 0.362593  | 2.356995 |
| 177 | V | 0.364662  | 2.189204 |
| 178 | V | 0.366043  | 2.462052 |
| 179 | V | 0.369787  | 2.322086 |
| 180 | V | 0.373942  | 2.282151 |



|     |   |          |          |
|-----|---|----------|----------|
| 181 | V | 0.377386 | 2.302409 |
| 182 | V | 0.386168 | 2.153123 |
| 183 | V | 0.386975 | 2.220476 |
| 184 | V | 0.396270 | 2.522982 |
| 185 | V | 0.401187 | 2.300562 |
| 186 | V | 0.403948 | 2.235486 |
| 187 | V | 0.409453 | 2.311223 |
| 188 | V | 0.415862 | 2.227584 |
| 189 | V | 0.420098 | 2.431140 |
| 190 | V | 0.426063 | 2.378512 |
| 191 | V | 0.427983 | 2.181004 |
| 192 | V | 0.440052 | 2.236812 |
| 193 | V | 0.446055 | 2.165416 |
| 194 | V | 0.450118 | 2.369098 |
| 195 | V | 0.454737 | 2.372383 |
| 196 | V | 0.460692 | 2.295986 |
| 197 | V | 0.465380 | 2.238506 |
| 198 | V | 0.469633 | 2.522040 |
| 199 | V | 0.471115 | 2.139279 |
| 200 | V | 0.476792 | 2.258197 |
| 201 | V | 0.477551 | 2.183484 |
| 202 | V | 0.483262 | 2.289767 |
| 203 | V | 0.486971 | 2.541706 |
| 204 | V | 0.490282 | 2.369893 |
| 205 | V | 0.500112 | 2.578437 |
| 206 | V | 0.515421 | 2.624116 |
| 207 | V | 0.525661 | 2.443743 |
| 208 | V | 0.537146 | 2.633907 |
| 209 | V | 0.541579 | 2.854129 |
| 210 | V | 0.551474 | 2.298153 |
| 211 | V | 0.558488 | 2.560411 |
| 212 | V | 0.566055 | 2.743107 |
| 213 | V | 0.574958 | 2.628722 |
| 214 | V | 0.584309 | 2.623414 |
| 215 | V | 0.592085 | 2.648077 |
| 216 | V | 0.594870 | 2.776982 |
| 217 | V | 0.601567 | 2.365785 |
| 218 | V | 0.607397 | 2.634939 |
| 219 | V | 0.617988 | 2.721783 |
| 220 | V | 0.624269 | 2.608837 |
| 221 | V | 0.633021 | 2.533405 |
| 222 | V | 0.635252 | 2.766866 |
| 223 | V | 0.642041 | 2.775805 |
| 224 | V | 0.649340 | 2.667602 |
| 225 | V | 0.656072 | 2.796248 |
| 226 | V | 0.666142 | 2.579732 |
| 227 | V | 0.670111 | 2.518709 |
| 228 | V | 0.674371 | 2.825391 |
| 229 | V | 0.680955 | 2.593678 |
| 230 | V | 0.682936 | 2.687303 |

|     |   |          |          |
|-----|---|----------|----------|
| 231 | V | 0.692662 | 2.572265 |
| 232 | V | 0.695002 | 2.618679 |
| 233 | V | 0.696997 | 2.710350 |
| 234 | V | 0.701879 | 2.621394 |
| 235 | V | 0.712213 | 2.863076 |
| 236 | V | 0.722182 | 2.602894 |
| 237 | V | 0.728911 | 2.643773 |
| 238 | V | 0.737080 | 2.695294 |
| 239 | V | 0.740415 | 2.604529 |
| 240 | V | 0.743631 | 2.579073 |
| 241 | V | 0.747824 | 2.550371 |
| 242 | V | 0.763072 | 2.792173 |
| 243 | V | 0.766922 | 2.862307 |
| 244 | V | 0.777774 | 2.866948 |
| 245 | V | 0.785097 | 2.916476 |
| 246 | V | 0.791048 | 2.964171 |
| 247 | V | 0.801348 | 2.917633 |
| 248 | V | 0.810073 | 2.601171 |
| 249 | V | 0.818970 | 2.852415 |
| 250 | V | 0.820592 | 2.831923 |
| 251 | V | 0.823122 | 2.759986 |
| 252 | V | 0.835388 | 2.670080 |
| 253 | V | 0.841447 | 2.728043 |
| 254 | V | 0.850840 | 3.044331 |
| 255 | V | 0.855997 | 2.752553 |
| 256 | V | 0.868173 | 2.621490 |
| 257 | V | 0.870860 | 2.948809 |
| 258 | V | 0.884210 | 2.654142 |
| 259 | V | 0.892816 | 2.691230 |
| 260 | V | 0.893948 | 2.468116 |
| 261 | V | 0.896499 | 2.614507 |
| 262 | V | 0.927434 | 2.511799 |
| 263 | V | 0.936301 | 2.666997 |
| 264 | V | 0.957364 | 2.986827 |
| 265 | V | 0.974784 | 3.086632 |
| 266 | V | 0.976463 | 2.540962 |
| 267 | V | 0.984181 | 2.619903 |
| 268 | V | 1.004862 | 2.701153 |
| 269 | V | 1.010831 | 2.965050 |
| 270 | V | 1.015101 | 2.679174 |
| 271 | V | 1.028064 | 2.720398 |
| 272 | V | 1.041104 | 2.877826 |
| 273 | V | 1.051916 | 2.824500 |
| 274 | V | 1.056870 | 2.731179 |
| 275 | V | 1.059435 | 2.585111 |
| 276 | V | 1.069037 | 2.696701 |
| 277 | V | 1.080698 | 2.718040 |
| 278 | V | 1.081915 | 2.795936 |
| 279 | V | 1.086538 | 2.642279 |
| 280 | V | 1.096770 | 2.713193 |

|     |   |          |          |
|-----|---|----------|----------|
| 281 | V | 1.104641 | 2.694004 |
| 282 | V | 1.113190 | 2.592263 |
| 283 | V | 1.119759 | 2.809119 |
| 284 | V | 1.130034 | 2.654312 |
| 285 | V | 1.135694 | 2.696567 |
| 286 | V | 1.139553 | 2.856499 |
| 287 | V | 1.153701 | 2.969673 |
| 288 | V | 1.170631 | 2.788974 |
| 289 | V | 1.175325 | 2.681663 |
| 290 | V | 1.194041 | 2.602917 |
| 291 | V | 1.196315 | 2.974362 |
| 292 | V | 1.208161 | 2.606634 |
| 293 | V | 1.213633 | 2.825059 |
| 294 | V | 1.219695 | 2.989602 |
| 295 | V | 1.235315 | 2.840522 |
| 296 | V | 1.237848 | 3.043160 |
| 297 | V | 1.251394 | 2.923356 |
| 298 | V | 1.256903 | 2.589650 |
| 299 | V | 1.260879 | 2.888806 |
| 300 | V | 1.266100 | 2.651628 |
| 301 | V | 1.273238 | 2.970631 |
| 302 | V | 1.285375 | 2.942283 |
| 303 | V | 1.297227 | 2.875206 |
| 304 | V | 1.306631 | 3.571599 |
| 305 | V | 1.317490 | 2.926350 |
| 306 | V | 1.333557 | 3.032520 |
| 307 | V | 1.340933 | 3.114599 |
| 308 | V | 1.343991 | 2.749531 |
| 309 | V | 1.356997 | 3.430510 |
| 310 | V | 1.376511 | 3.064928 |
| 311 | V | 1.405578 | 3.371501 |
| 312 | V | 1.420553 | 3.888563 |
| 313 | V | 1.425491 | 3.045925 |
| 314 | V | 1.447226 | 2.958054 |
| 315 | V | 1.453757 | 3.149105 |
| 316 | V | 1.483589 | 3.294641 |
| 317 | V | 1.487388 | 3.640621 |
| 318 | V | 1.499043 | 3.941617 |
| 319 | V | 1.509862 | 3.037535 |
| 320 | V | 1.550351 | 3.731315 |
| 321 | V | 1.571561 | 3.535610 |
| 322 | V | 1.579410 | 3.471642 |
| 323 | V | 1.587498 | 2.976738 |
| 324 | V | 1.596233 | 3.323061 |
| 325 | V | 1.602467 | 3.373127 |
| 326 | V | 1.609079 | 3.373168 |
| 327 | V | 1.611367 | 3.335575 |
| 328 | V | 1.614223 | 3.099269 |
| 329 | V | 1.628430 | 3.103003 |
| 330 | V | 1.630612 | 3.280466 |

|     |   |          |          |
|-----|---|----------|----------|
| 331 | V | 1.637890 | 3.263681 |
| 332 | V | 1.647921 | 3.545695 |
| 333 | V | 1.661916 | 3.417813 |
| 334 | V | 1.666657 | 3.513223 |
| 335 | V | 1.676666 | 3.543686 |
| 336 | V | 1.680139 | 3.400025 |
| 337 | V | 1.698534 | 3.257532 |
| 338 | V | 1.705548 | 3.201733 |
| 339 | V | 1.712043 | 3.504447 |
| 340 | V | 1.716392 | 3.655510 |
| 341 | V | 1.730219 | 3.719034 |
| 342 | V | 1.739109 | 3.282272 |
| 343 | V | 1.746424 | 3.346149 |
| 344 | V | 1.748387 | 3.315963 |
| 345 | V | 1.755459 | 3.475969 |
| 346 | V | 1.760594 | 3.475195 |
| 347 | V | 1.762090 | 3.365130 |
| 348 | V | 1.770139 | 3.657910 |
| 349 | V | 1.780761 | 3.469900 |
| 350 | V | 1.792437 | 3.559990 |
| 351 | V | 1.795012 | 3.247703 |
| 352 | V | 1.805975 | 3.565095 |
| 353 | V | 1.825803 | 3.514421 |
| 354 | V | 1.837913 | 3.556027 |
| 355 | V | 1.845124 | 3.334994 |
| 356 | V | 1.854906 | 3.474556 |
| 357 | V | 1.857654 | 3.085171 |
| 358 | V | 1.859661 | 3.447262 |
| 359 | V | 1.874537 | 3.687635 |
| 360 | V | 1.879435 | 3.247998 |
| 361 | V | 1.887612 | 3.406774 |
| 362 | V | 1.903180 | 4.057581 |
| 363 | V | 1.915659 | 3.610898 |
| 364 | V | 1.916999 | 3.574649 |
| 365 | V | 1.920764 | 3.947989 |
| 366 | V | 1.929589 | 3.590089 |
| 367 | V | 1.938723 | 3.568050 |
| 368 | V | 1.947338 | 3.464191 |
| 369 | V | 1.954124 | 4.064390 |
| 370 | V | 1.976577 | 3.649003 |
| 371 | V | 1.978436 | 3.427039 |
| 372 | V | 1.994723 | 3.396133 |
| 373 | V | 2.004704 | 3.687147 |
| 374 | V | 2.013228 | 3.597672 |
| 375 | V | 2.021552 | 3.701733 |
| 376 | V | 2.052196 | 3.508335 |
| 377 | V | 2.066816 | 3.857416 |
| 378 | V | 2.081814 | 3.511147 |
| 379 | V | 2.088811 | 3.609106 |
| 380 | V | 2.093921 | 3.800005 |

|     |   |          |          |
|-----|---|----------|----------|
| 381 | V | 2.105623 | 3.751586 |
| 382 | V | 2.107260 | 3.607695 |
| 383 | V | 2.125220 | 3.679906 |
| 384 | V | 2.133841 | 3.821150 |
| 385 | V | 2.135517 | 3.654177 |
| 386 | V | 2.143639 | 3.650725 |
| 387 | V | 2.156469 | 3.791708 |
| 388 | V | 2.174923 | 3.497922 |
| 389 | V | 2.196854 | 3.722133 |
| 390 | V | 2.202355 | 3.726902 |
| 391 | V | 2.208249 | 3.971880 |
| 392 | V | 2.221718 | 3.646993 |
| 393 | V | 2.227642 | 3.676777 |
| 394 | V | 2.232172 | 3.675668 |
| 395 | V | 2.244922 | 3.808765 |
| 396 | V | 2.248114 | 3.787827 |
| 397 | V | 2.250506 | 3.730908 |
| 398 | V | 2.256465 | 3.353940 |
| 399 | V | 2.261063 | 3.663288 |
| 400 | V | 2.265396 | 3.590788 |
| 401 | V | 2.276389 | 3.824978 |
| 402 | V | 2.296233 | 3.687159 |
| 403 | V | 2.314430 | 3.896397 |
| 404 | V | 2.322205 | 3.950402 |
| 405 | V | 2.327213 | 3.889321 |
| 406 | V | 2.329048 | 3.932861 |
| 407 | V | 2.342947 | 3.776048 |
| 408 | V | 2.362152 | 3.792329 |
| 409 | V | 2.363710 | 3.733377 |
| 410 | V | 2.370911 | 3.889893 |
| 411 | V | 2.387317 | 3.807620 |
| 412 | V | 2.393870 | 3.901963 |
| 413 | V | 2.406282 | 4.022329 |
| 414 | V | 2.415423 | 3.908777 |
| 415 | V | 2.422794 | 3.862092 |
| 416 | V | 2.434533 | 3.852118 |
| 417 | V | 2.447906 | 3.736328 |
| 418 | V | 2.452793 | 3.928173 |
| 419 | V | 2.462311 | 4.053878 |
| 420 | V | 2.470360 | 3.927815 |
| 421 | V | 2.477164 | 4.201222 |
| 422 | V | 2.481418 | 4.175023 |
| 423 | V | 2.490121 | 4.077907 |
| 424 | V | 2.495960 | 4.416357 |
| 425 | V | 2.522034 | 4.259099 |
| 426 | V | 2.526842 | 4.033475 |
| 427 | V | 2.539407 | 3.960703 |
| 428 | V | 2.550464 | 4.045365 |
| 429 | V | 2.556396 | 4.193283 |
| 430 | V | 2.562788 | 3.978011 |

|     |   |          |          |
|-----|---|----------|----------|
| 431 | V | 2.572108 | 4.354376 |
| 432 | V | 2.574558 | 3.974750 |
| 433 | V | 2.604739 | 4.288470 |
| 434 | V | 2.616771 | 4.336548 |
| 435 | V | 2.626917 | 4.385877 |
| 436 | V | 2.635669 | 4.063276 |
| 437 | V | 2.650875 | 4.430044 |
| 438 | V | 2.660223 | 4.512721 |
| 439 | V | 2.675758 | 4.579819 |
| 440 | V | 2.702029 | 4.508134 |
| 441 | V | 2.721522 | 4.782115 |
| 442 | V | 2.733651 | 4.625414 |
| 443 | V | 2.748969 | 4.623290 |
| 444 | V | 2.752925 | 4.708079 |
| 445 | V | 2.772360 | 4.748776 |
| 446 | V | 2.779455 | 4.701897 |
| 447 | V | 2.790958 | 4.487892 |
| 448 | V | 2.828861 | 4.603701 |
| 449 | V | 2.844699 | 4.828782 |
| 450 | V | 2.879482 | 4.714436 |
| 451 | V | 2.919410 | 4.756085 |
| 452 | V | 2.939802 | 4.962720 |
| 453 | V | 2.967130 | 4.802565 |
| 454 | V | 2.983374 | 4.901792 |
| 455 | V | 3.029727 | 4.929285 |
| 456 | V | 3.046874 | 4.960943 |
| 457 | V | 3.093532 | 4.942244 |
| 458 | V | 3.099732 | 4.787914 |
| 459 | V | 3.109972 | 4.870866 |
| 460 | V | 3.122446 | 4.855344 |
| 461 | V | 3.132204 | 5.205680 |
| 462 | V | 3.178212 | 5.025656 |
| 463 | V | 3.185373 | 5.199238 |
| 464 | V | 3.212946 | 5.078789 |
| 465 | V | 3.261921 | 5.084330 |
| 466 | V | 3.264681 | 5.100249 |
| 467 | V | 3.342534 | 5.261268 |
| 468 | V | 3.356687 | 5.299122 |
| 469 | V | 3.399810 | 5.410935 |
| 470 | V | 3.484224 | 5.563998 |
| 471 | V | 3.577600 | 5.551741 |
| 472 | V | 3.682330 | 5.563280 |
| 473 | V | 3.754262 | 5.651007 |
| 474 | V | 7.174543 | 2.544914 |

Total kinetic energy from orbitals= 1.796225271171D+03

ar.28298.1.1.1r  
PROTON8 DMSO {C:\Espectros\HCereceto} automatico

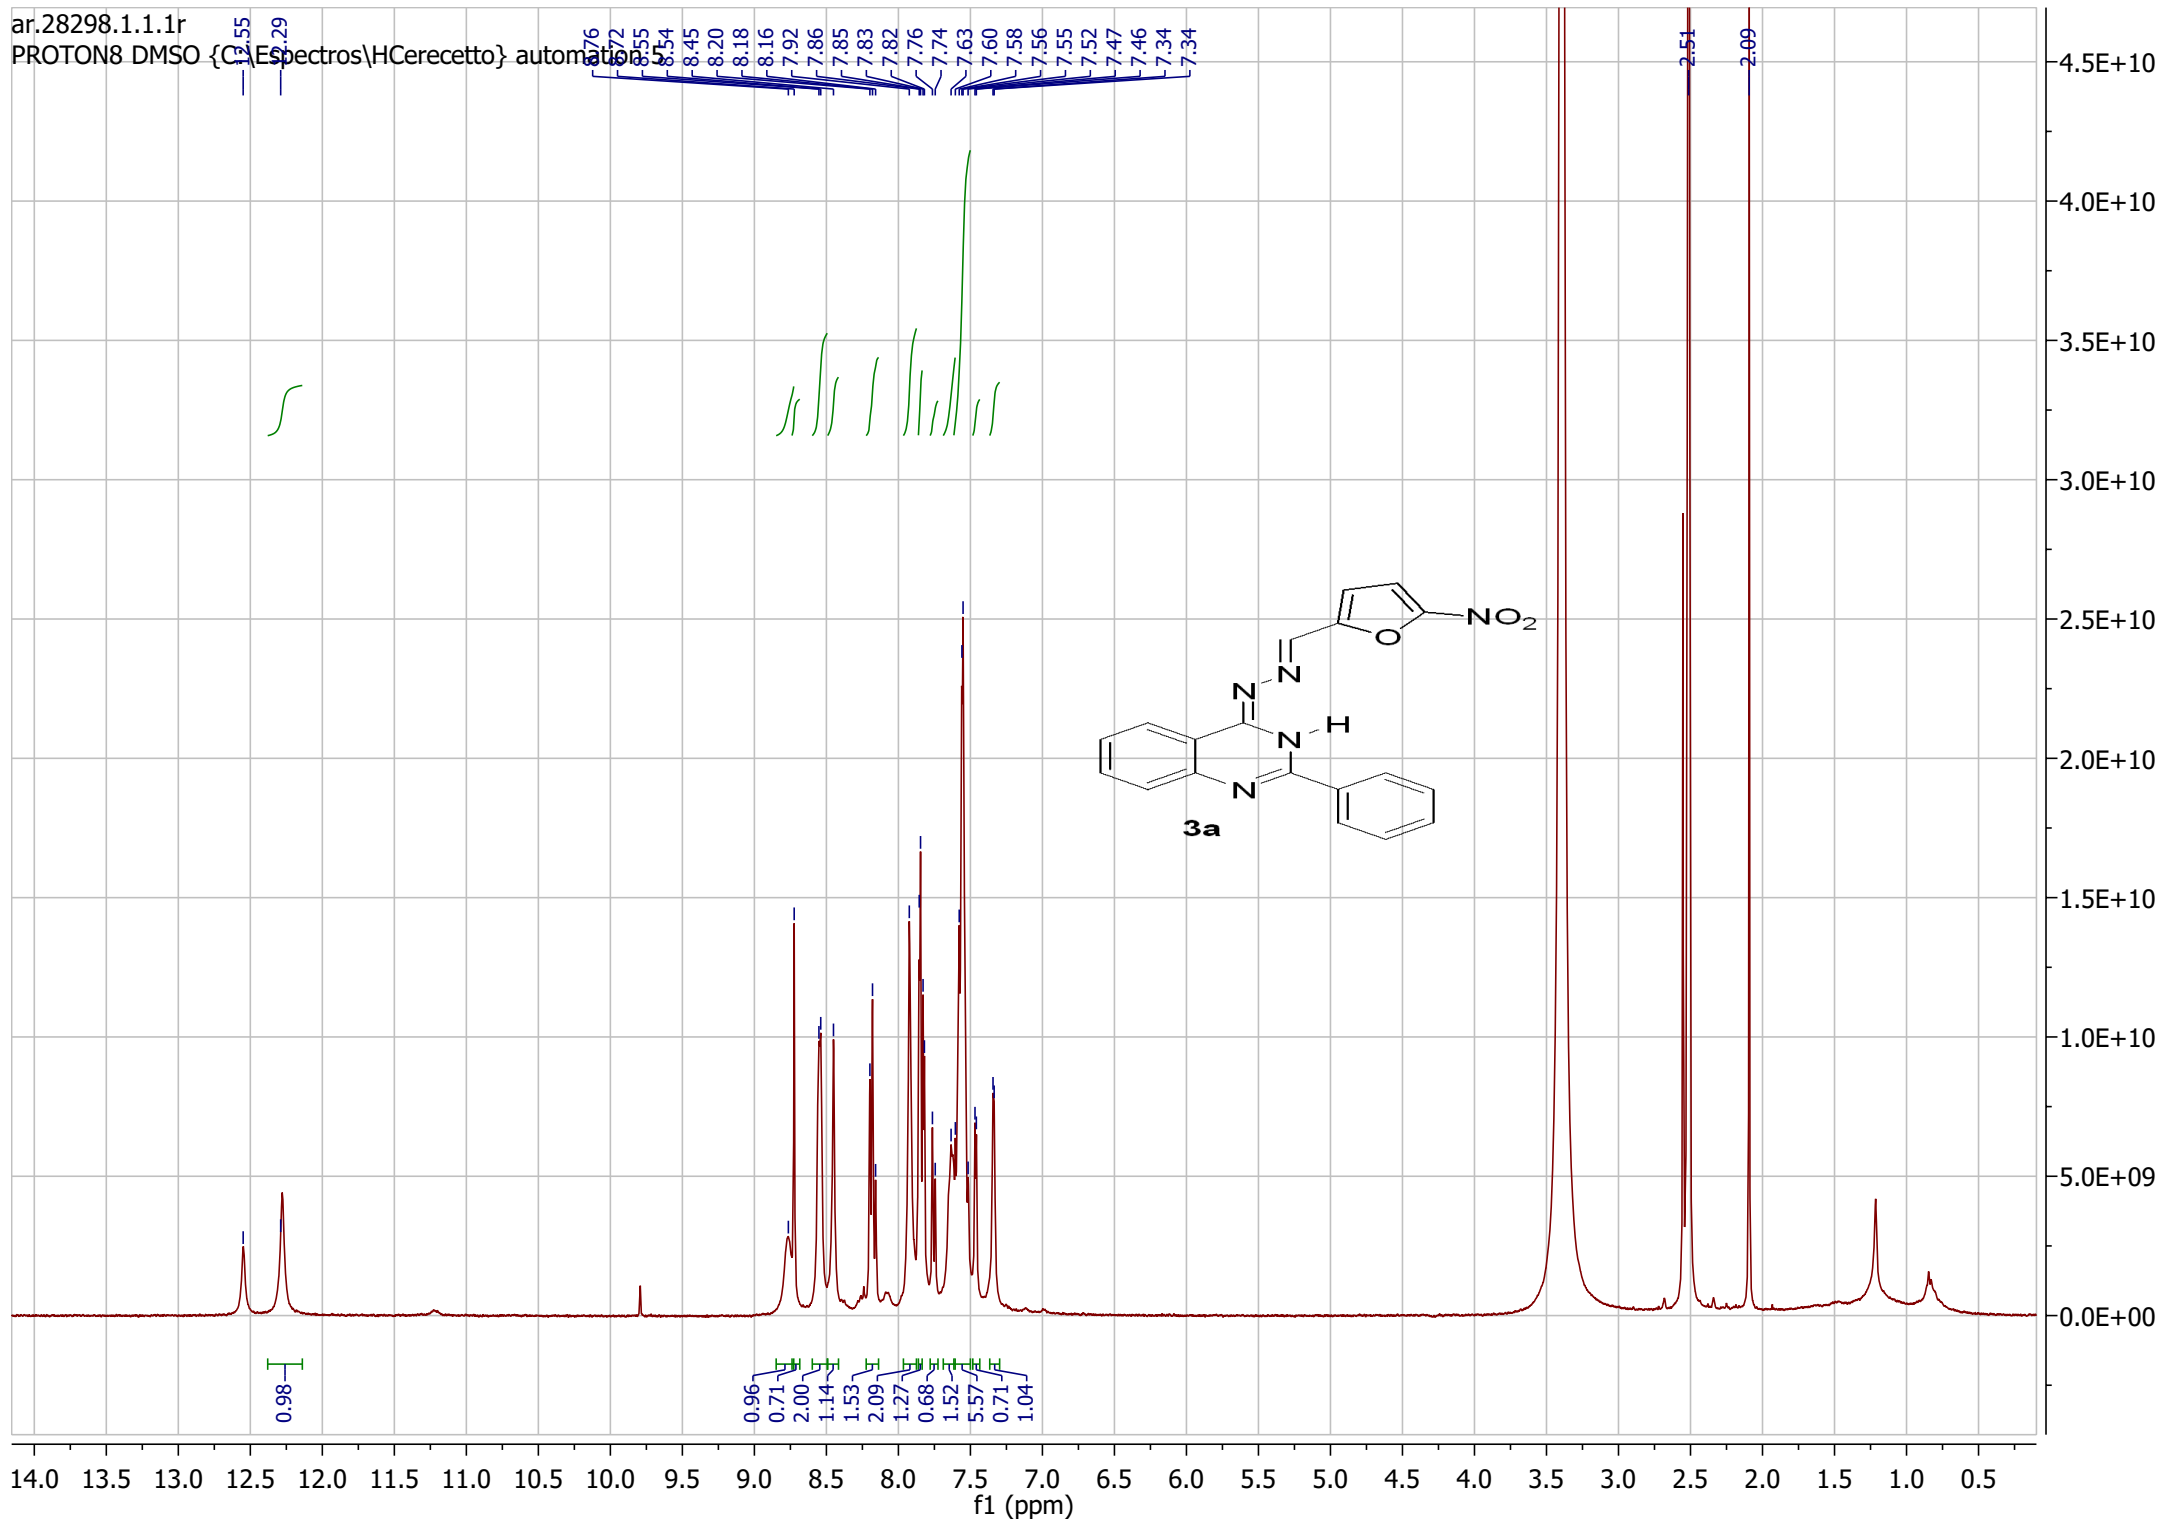

ar.28298.1.1.14  
PROTON8 DMSO-d6: \Espectros\HCepecetto automation 5

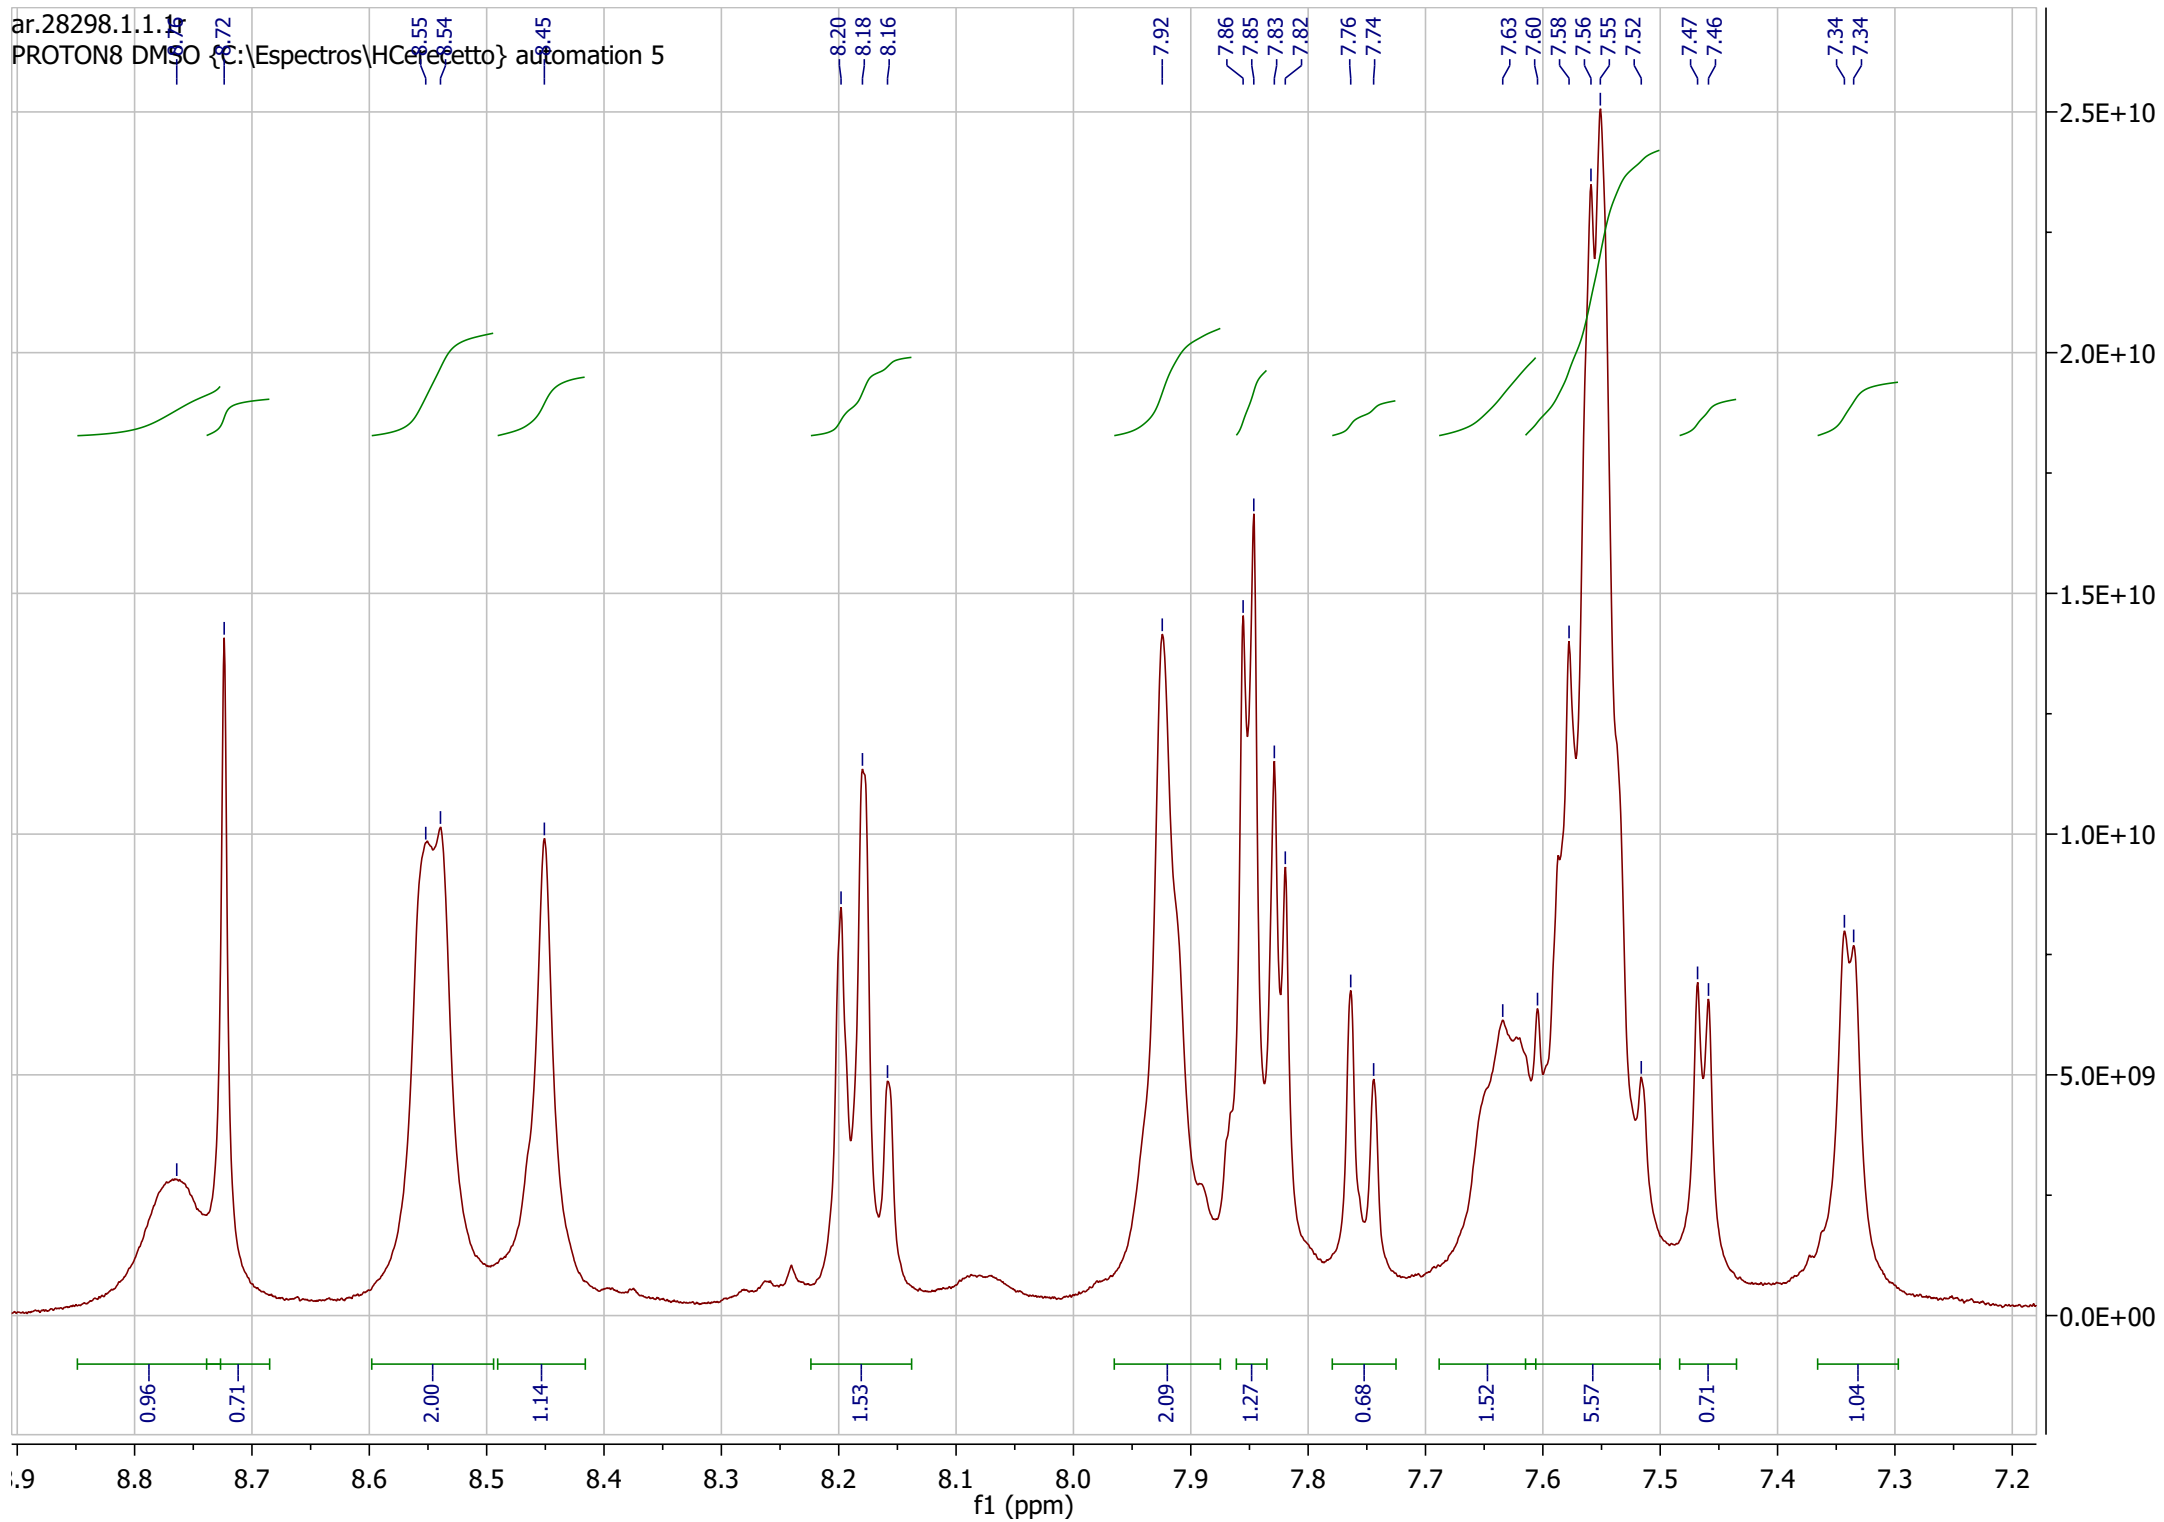



ar. 28298.2.1.1r  
Angel AR-QHHf  
C13CPD DMSO {C:\Espectros\HCerecetto\_automation 5

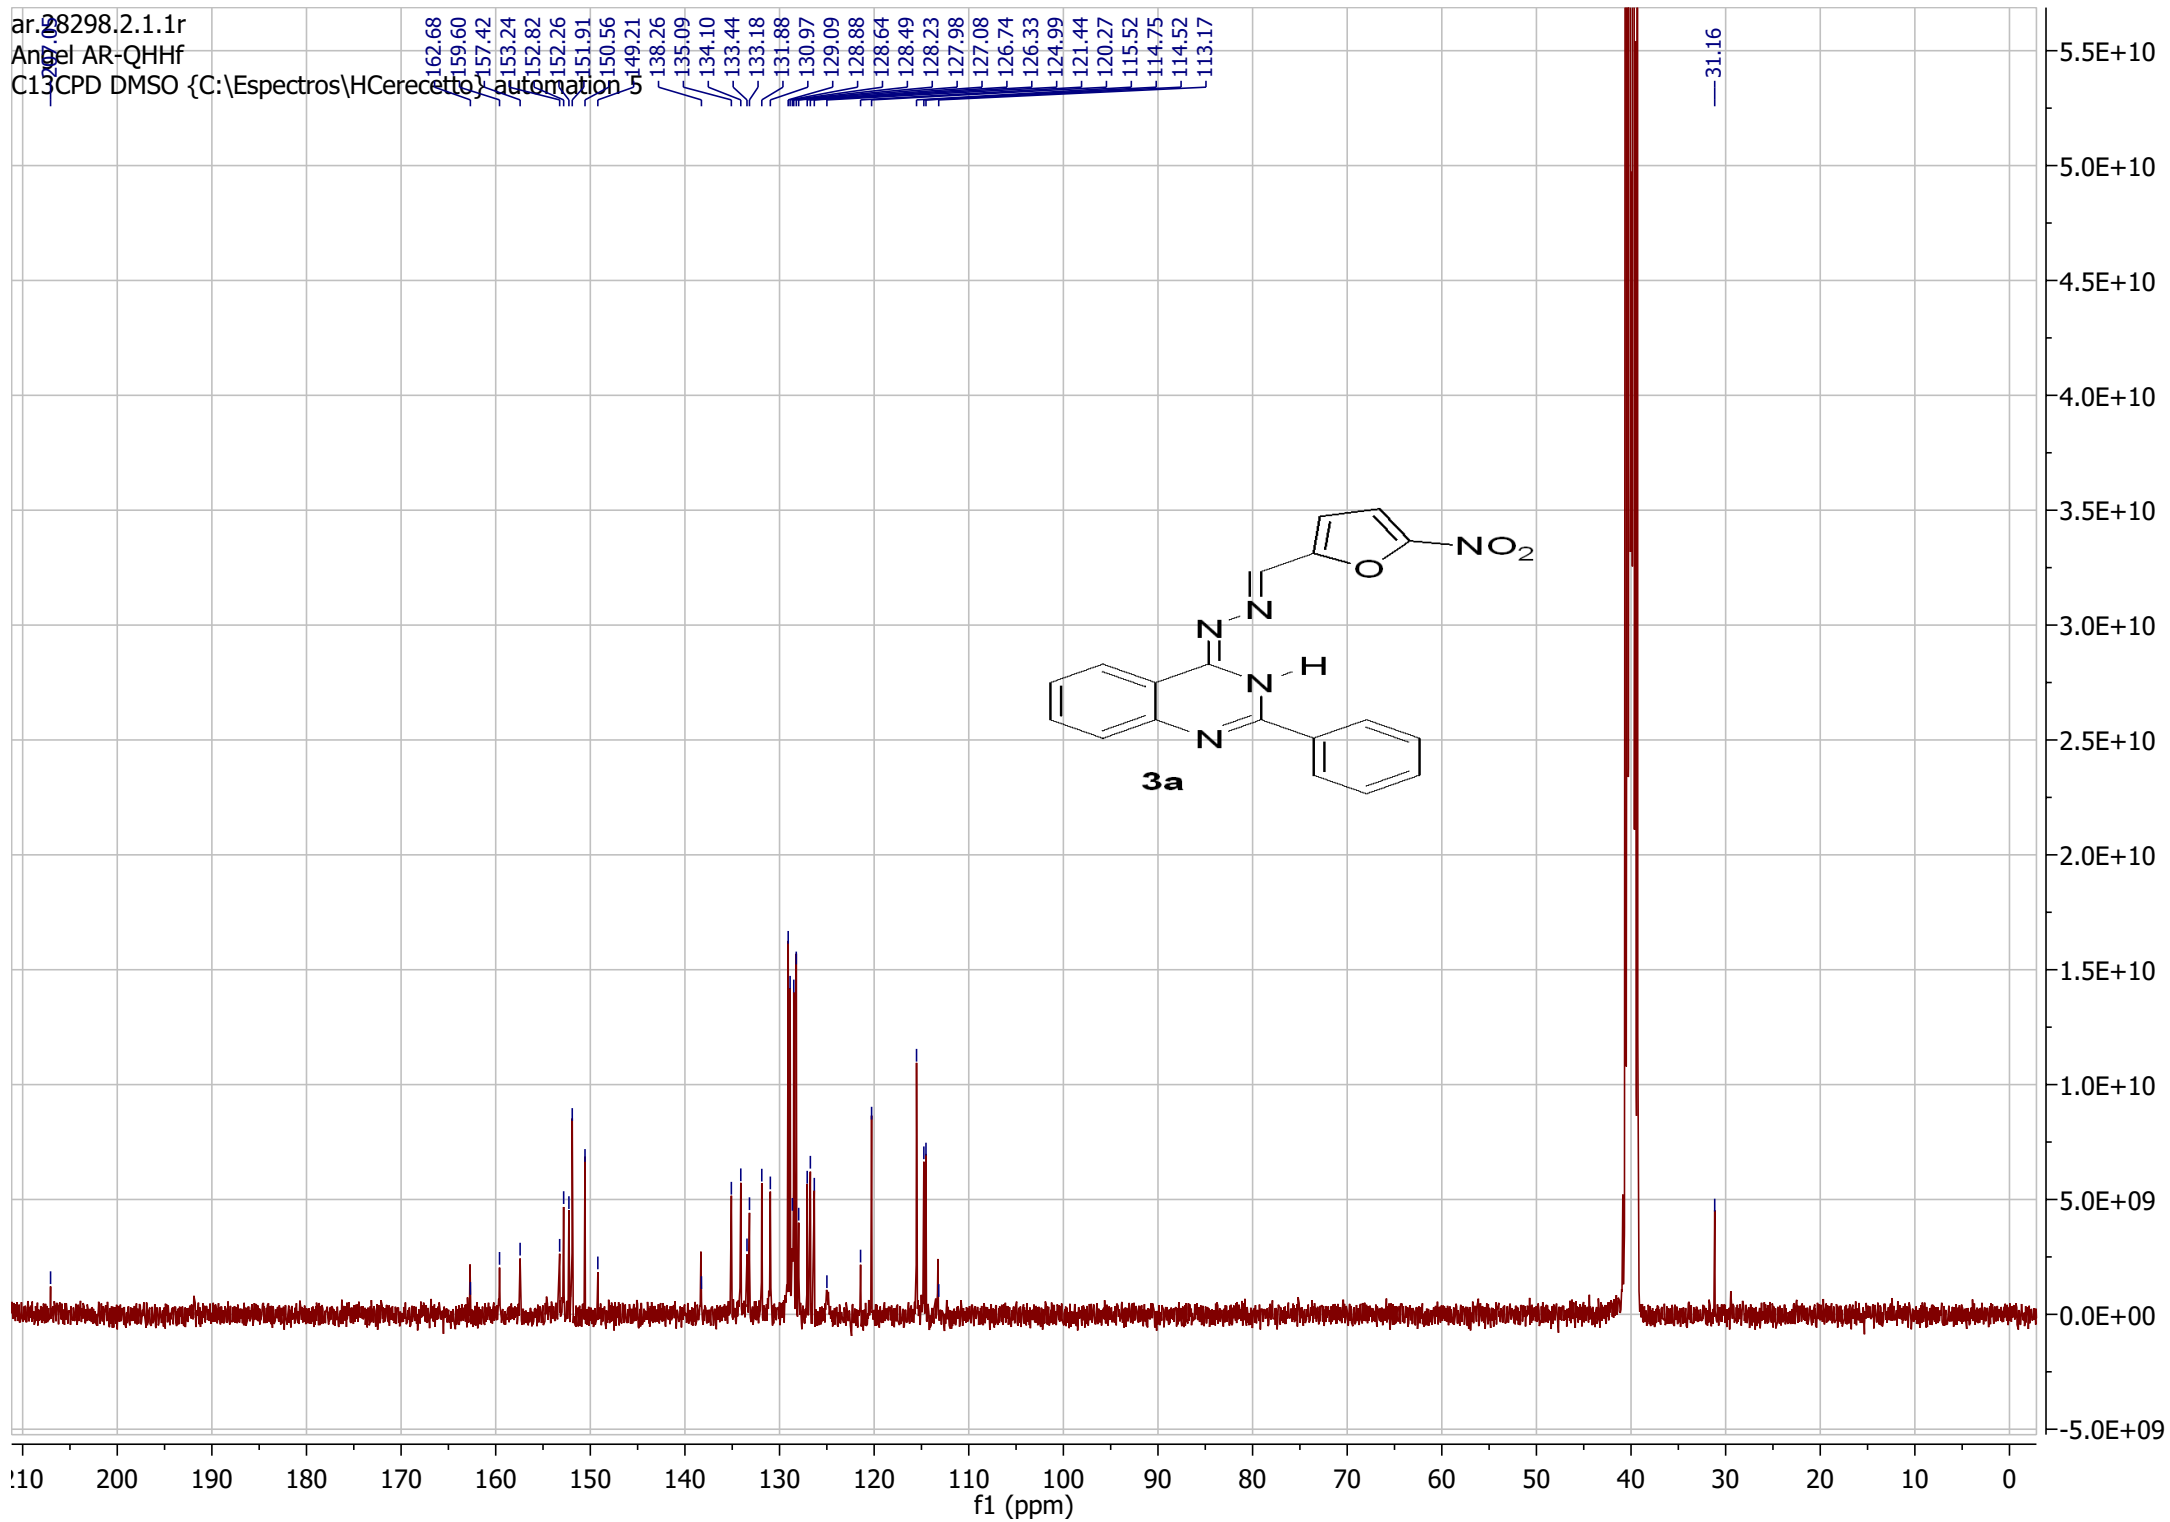

ar28298.2.161  
Angel AR-QMf  
C13CPD DMSO {C:\Espectros\HCerecetto} automation 5

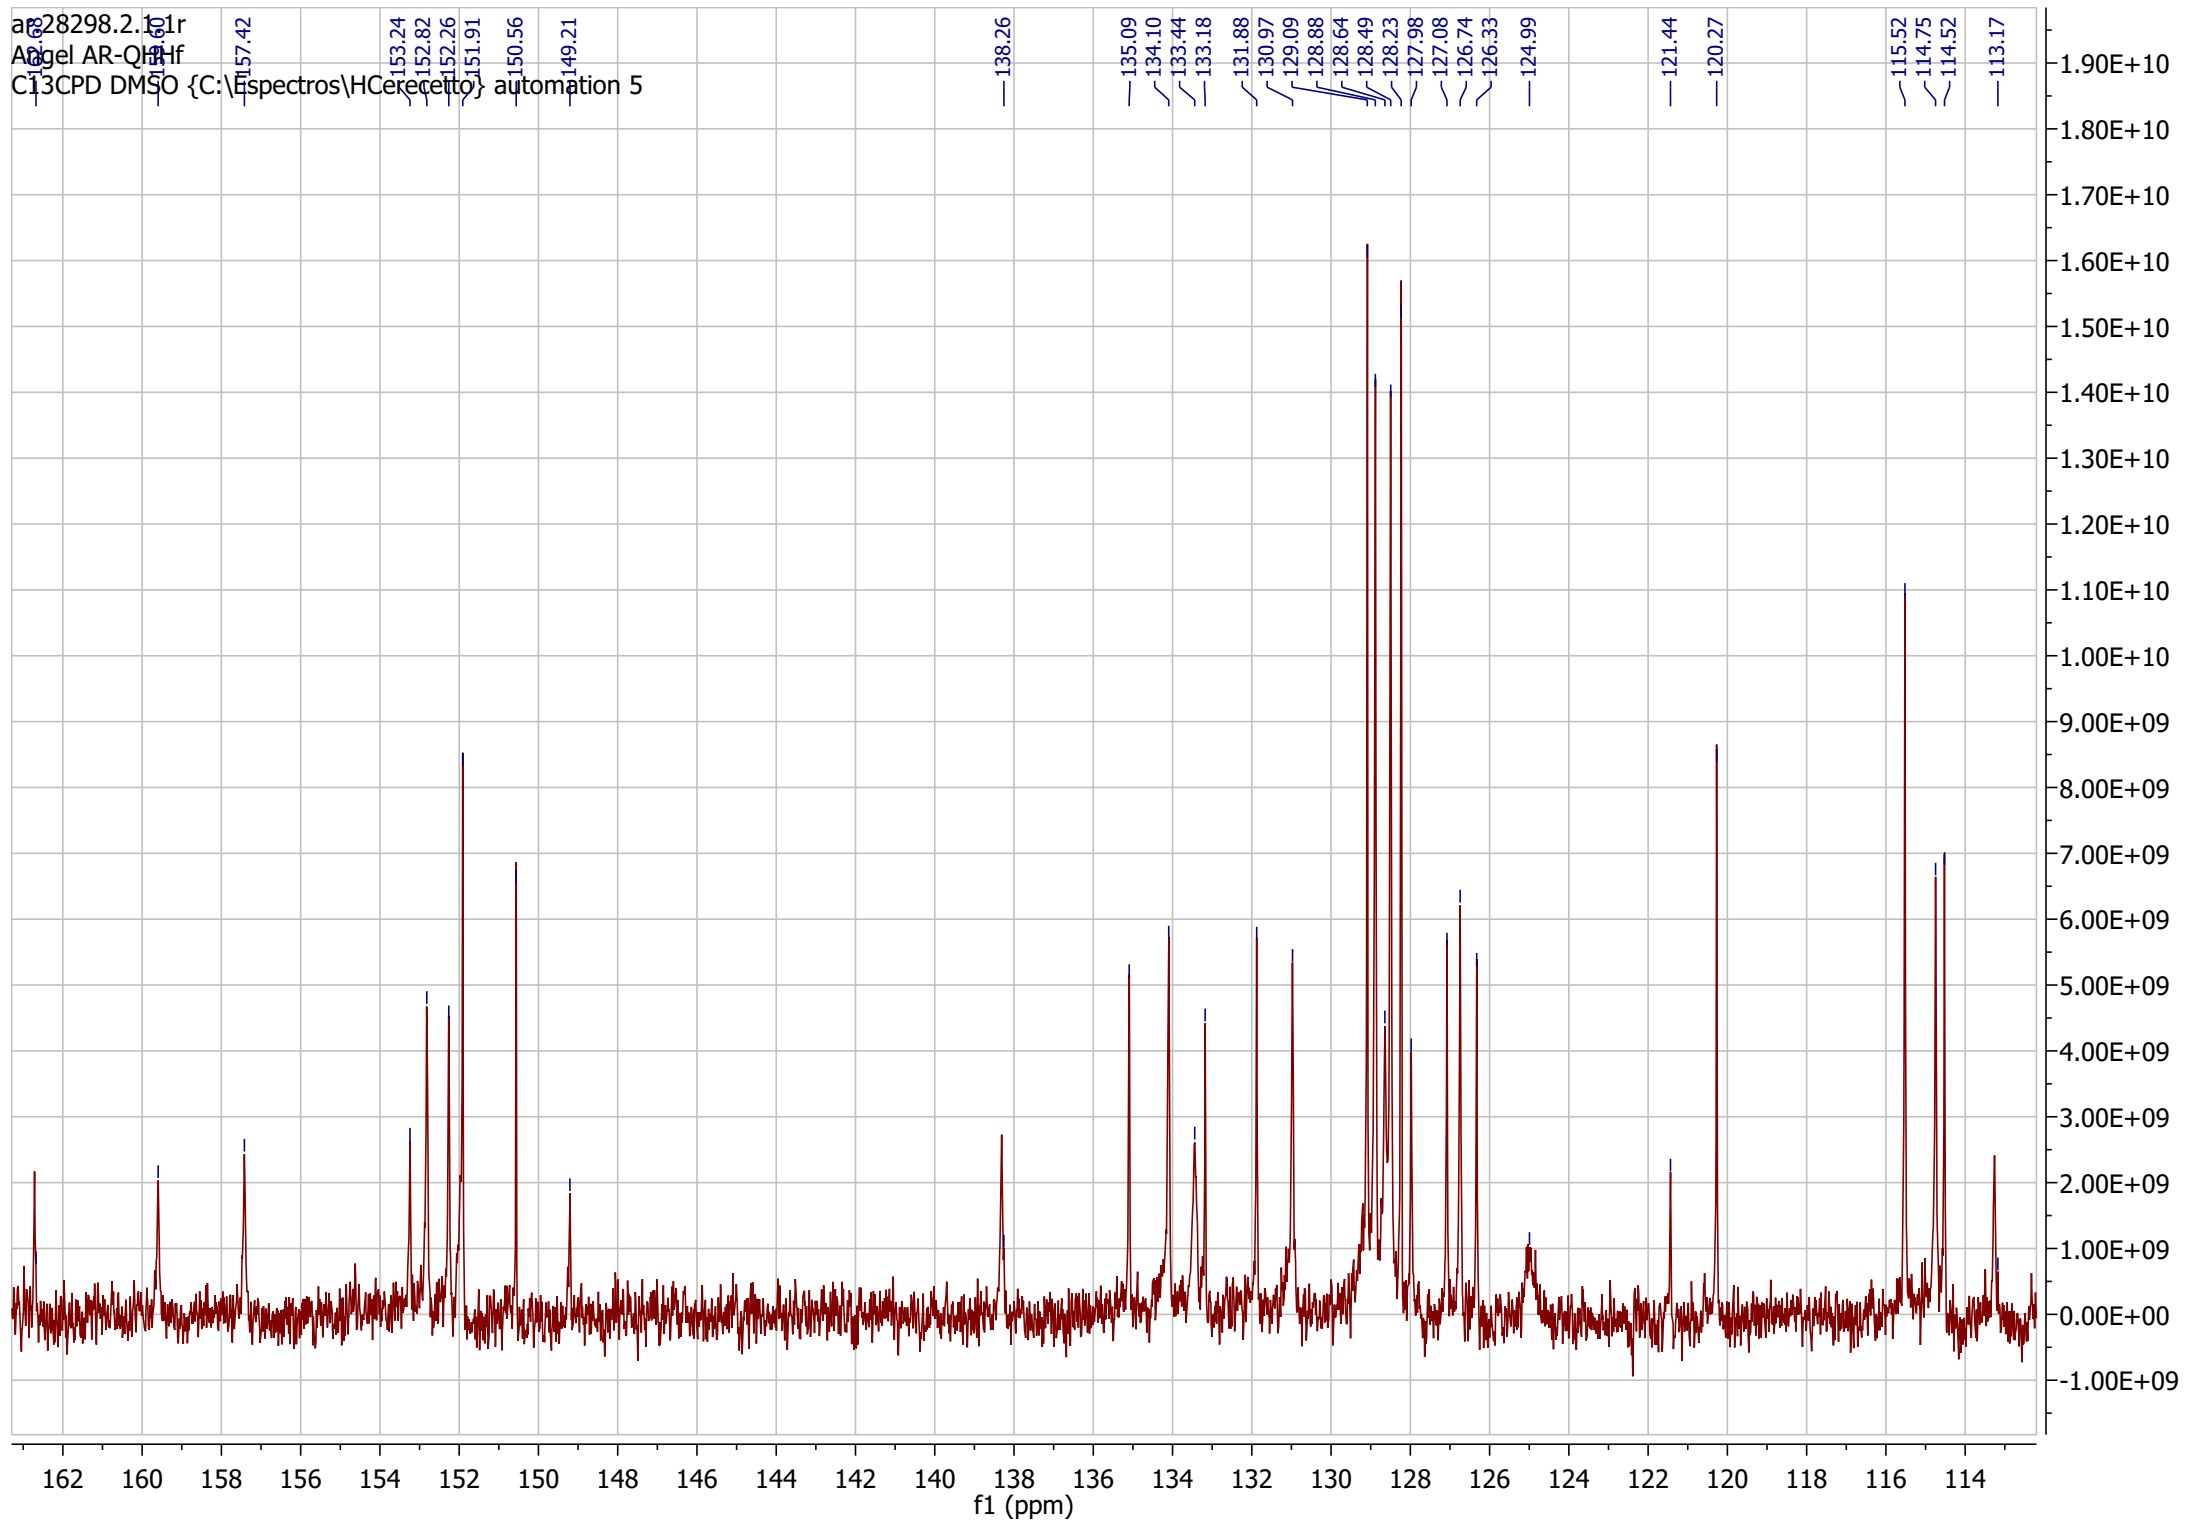

ar.28298.2.1.1r  
Angel AR-QHHf  
C13CPD DMSO {C:\Espectros\HCerecetto} automation 5

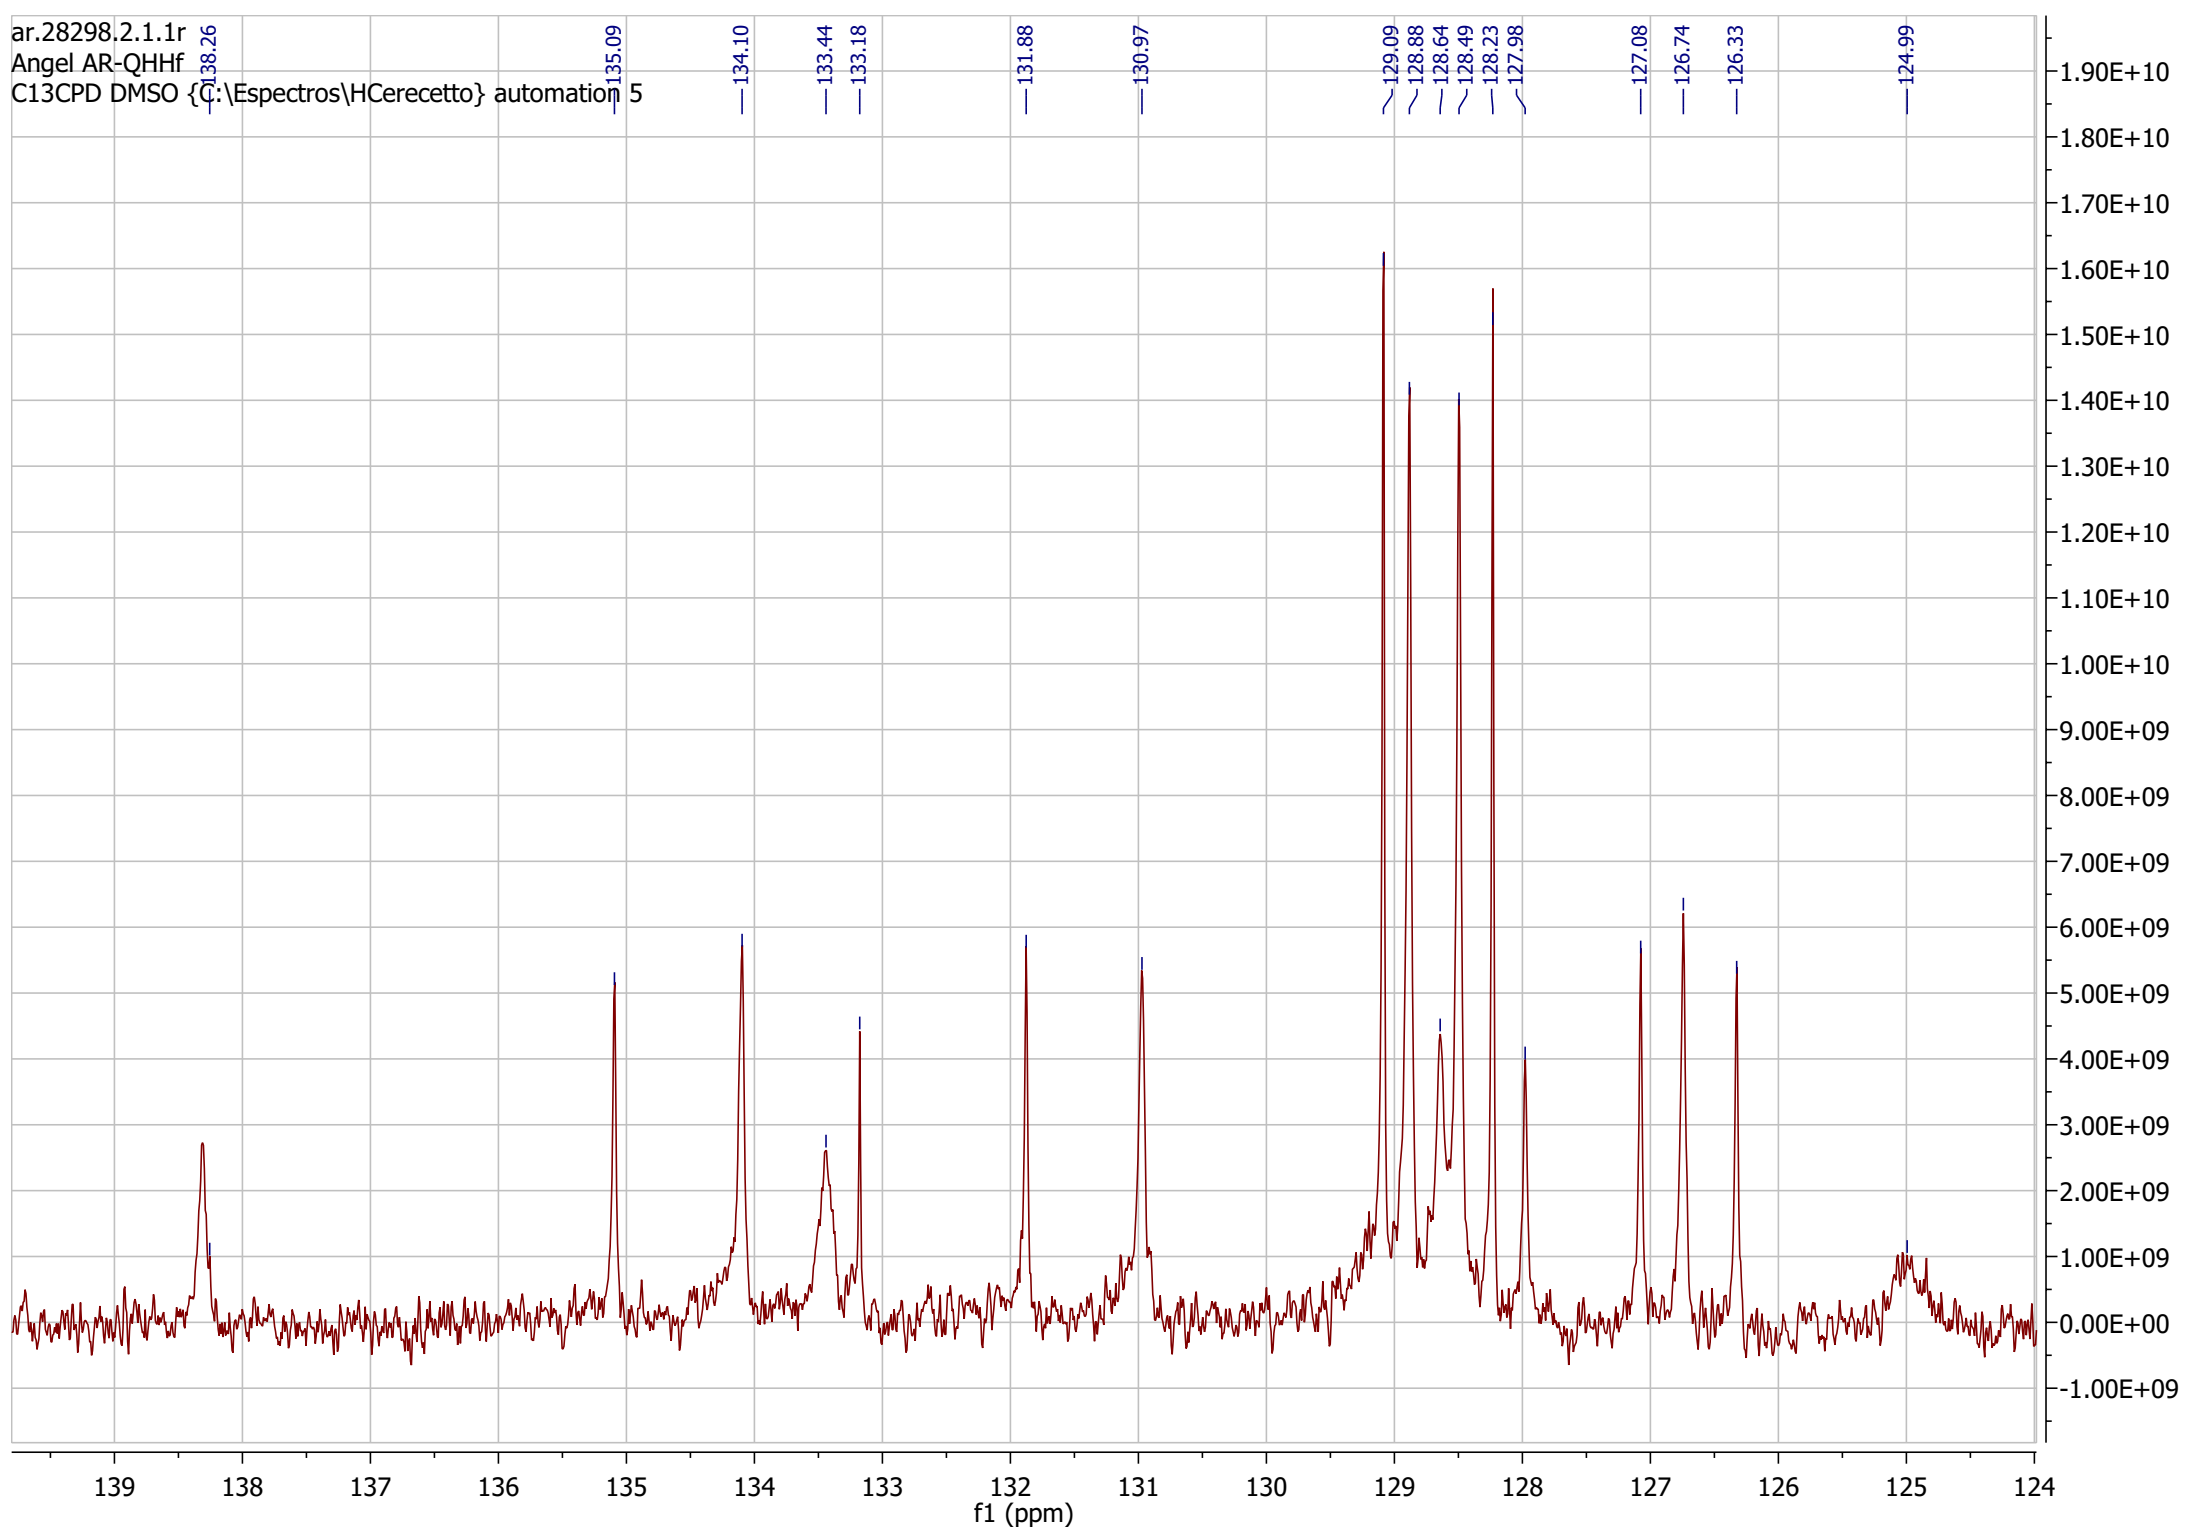

ar.28176.1.f1r  
Angel AR-Q4F 270C  
PROTON8 DMSO {C:\Espectros\HCerecetto} automation 3

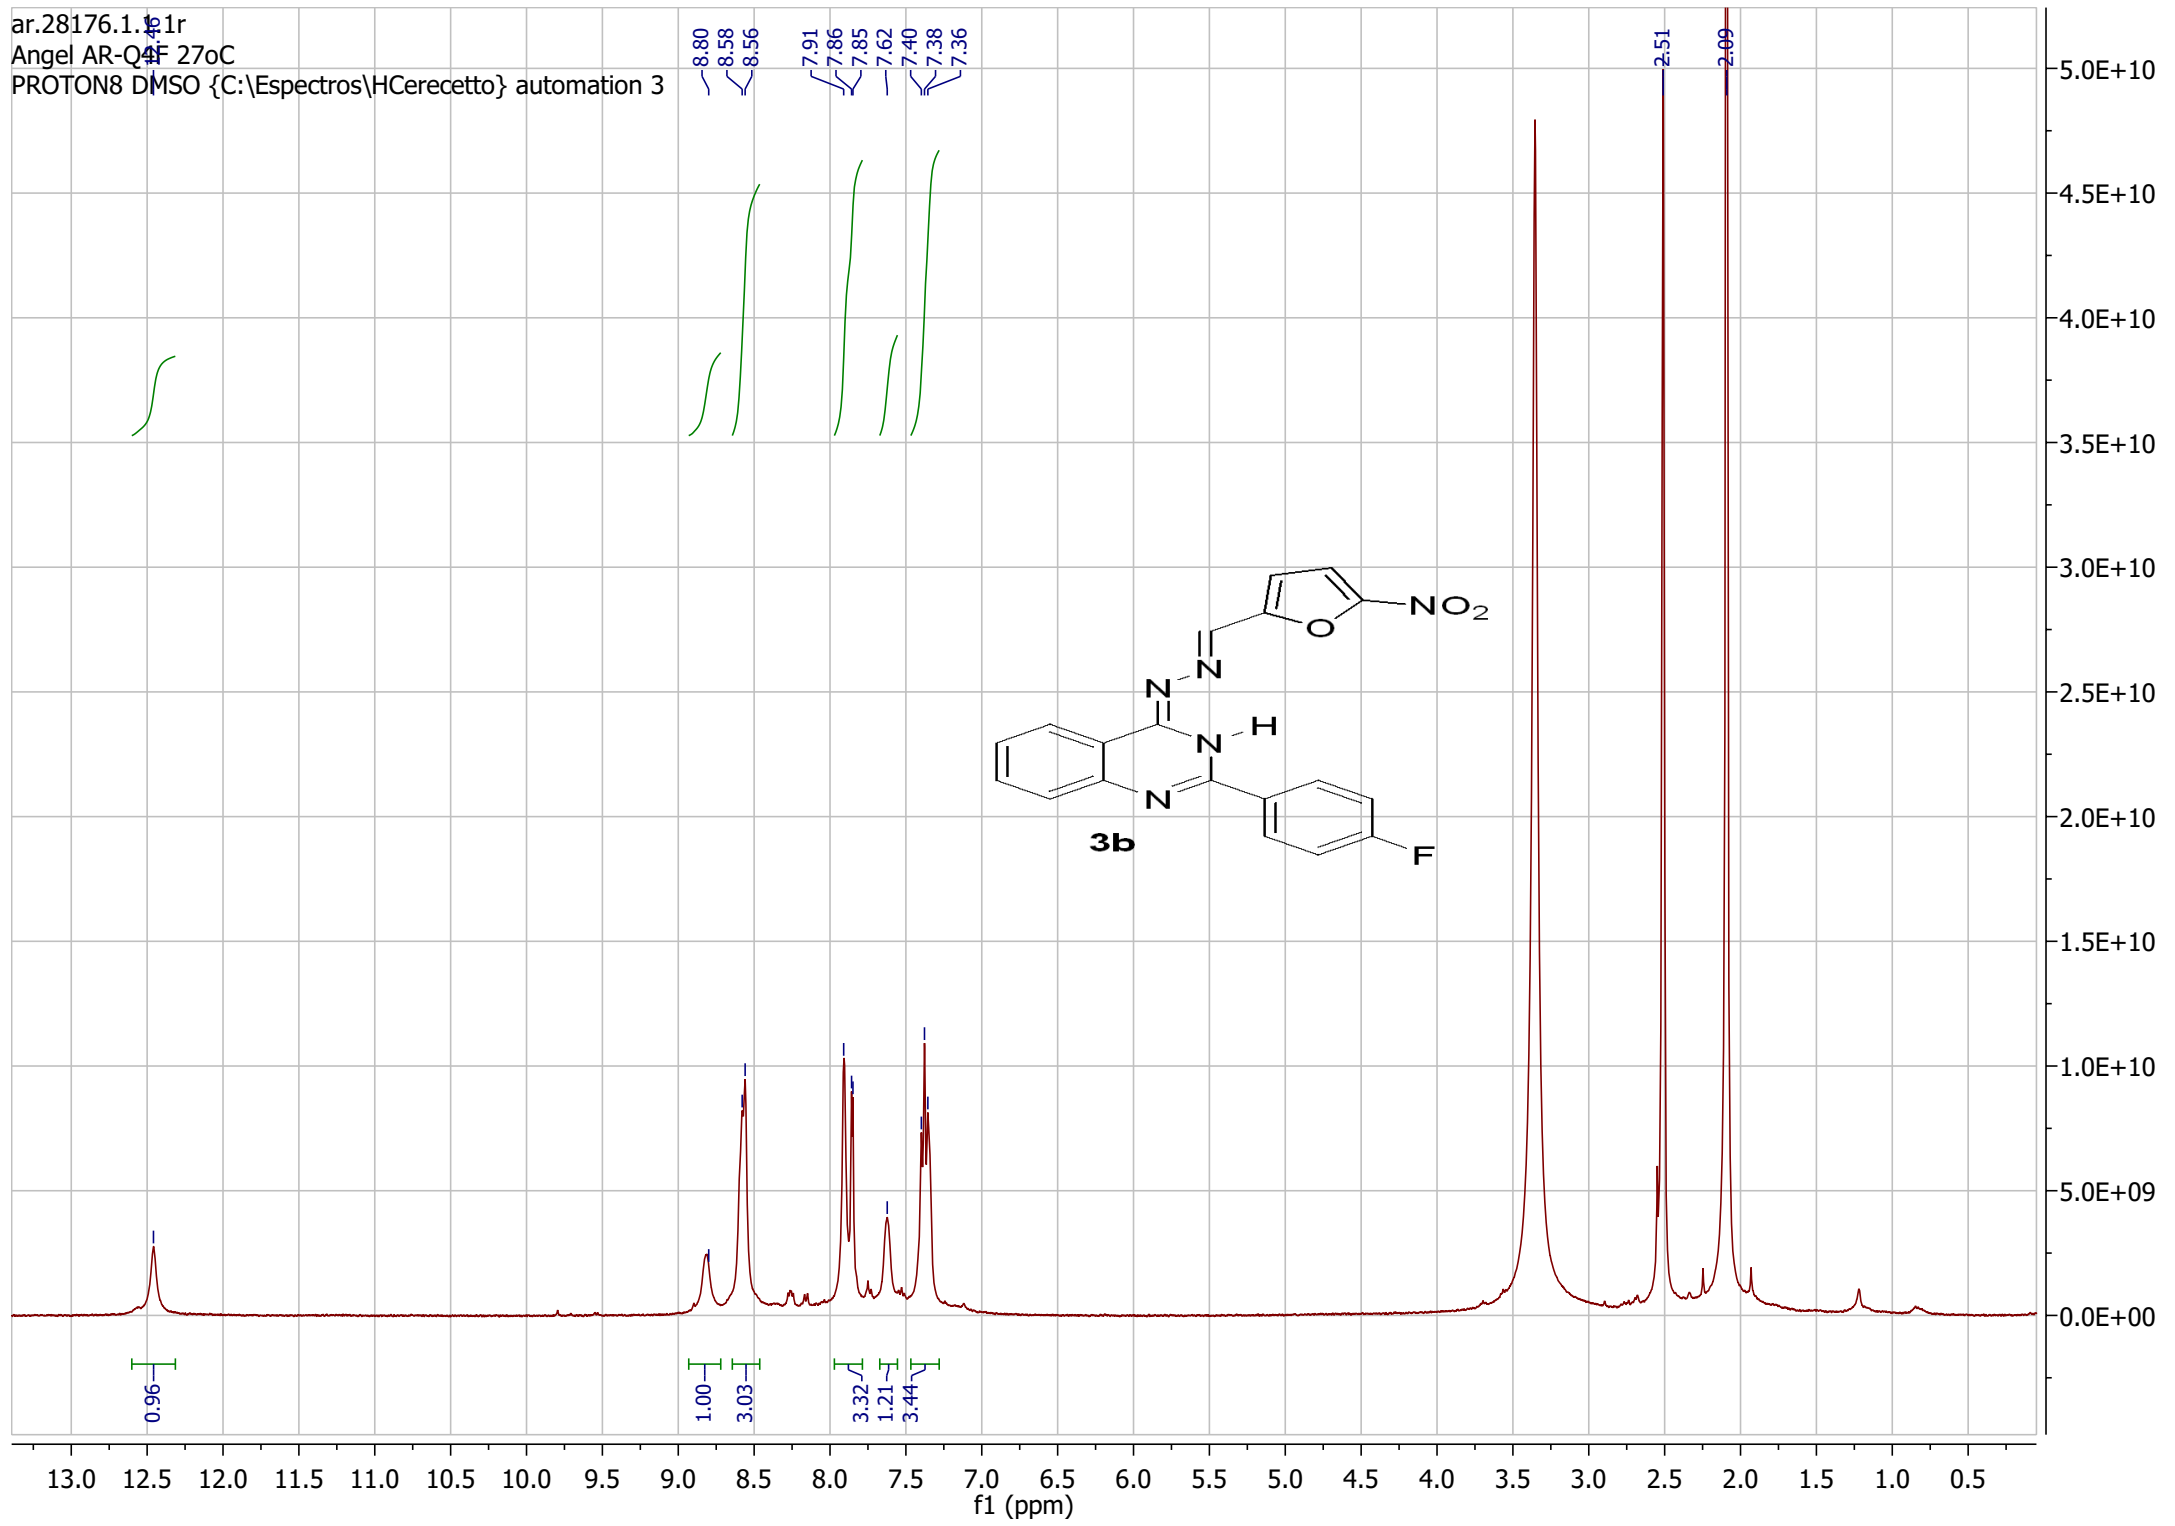

ar.28176.1.1.1r  
Angel AR-Q4F 27oC  
PROTON8 DMSO {C:\Espectros\HCerecetto} automation 3

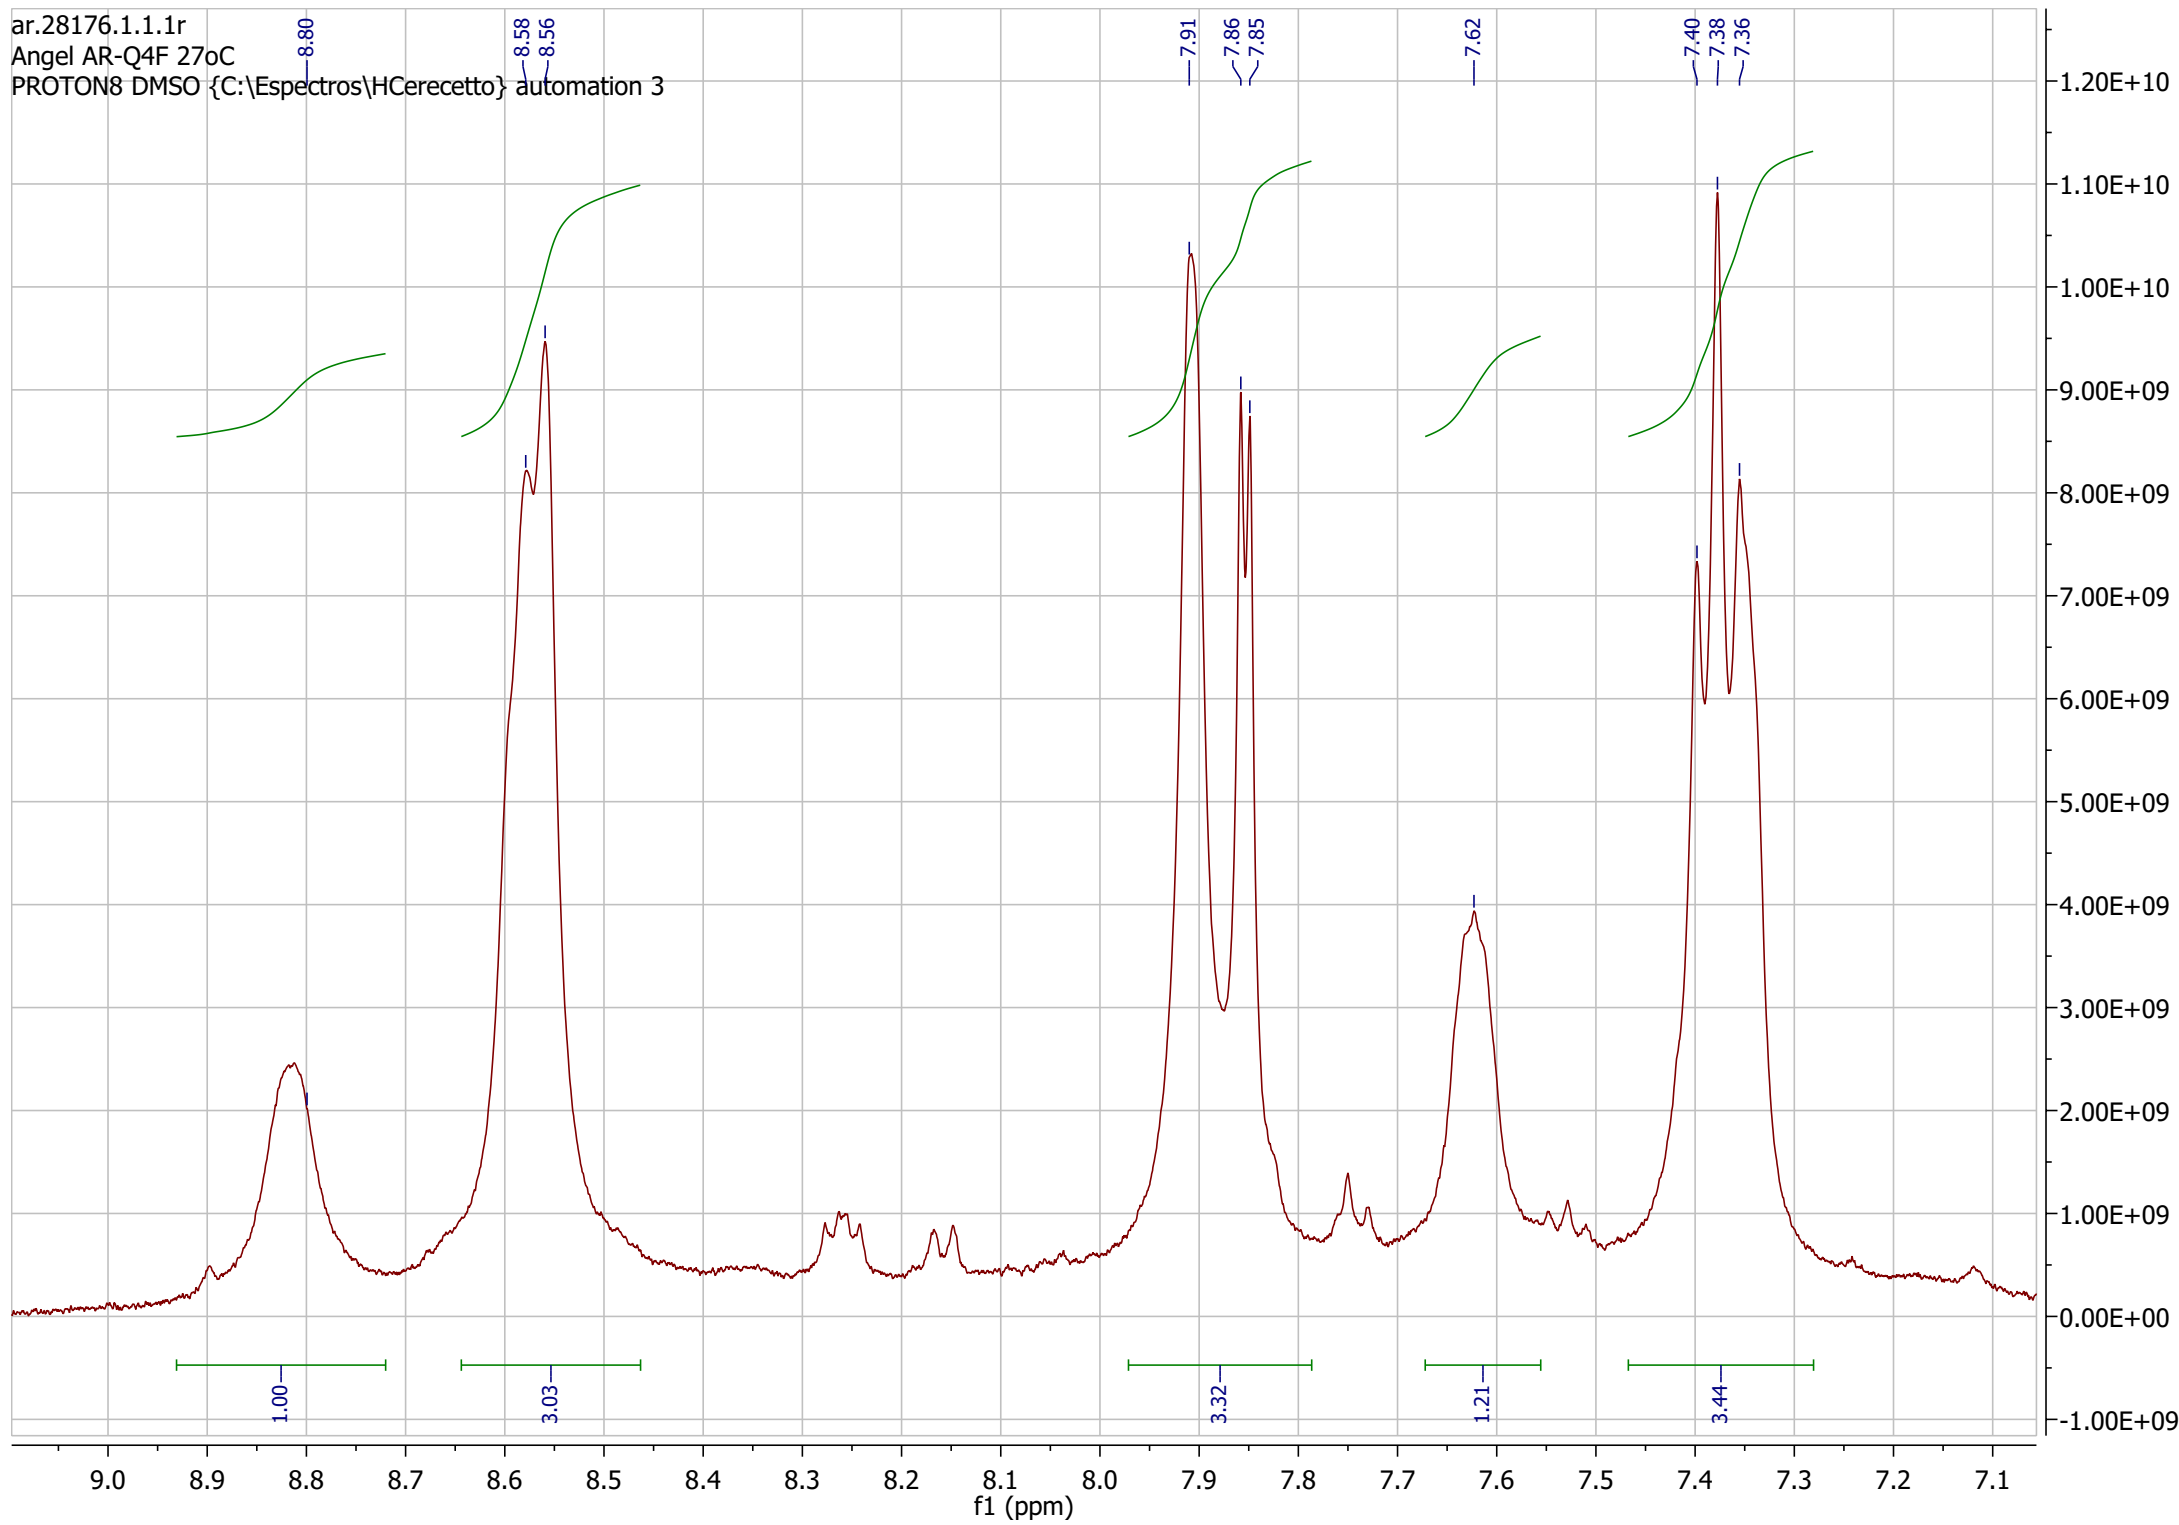

ar.281763.1.1r  
Angel ARXQ4F 27oC  
C13CPD DMSO {C:\Espectros\HCerecetto} automation 13

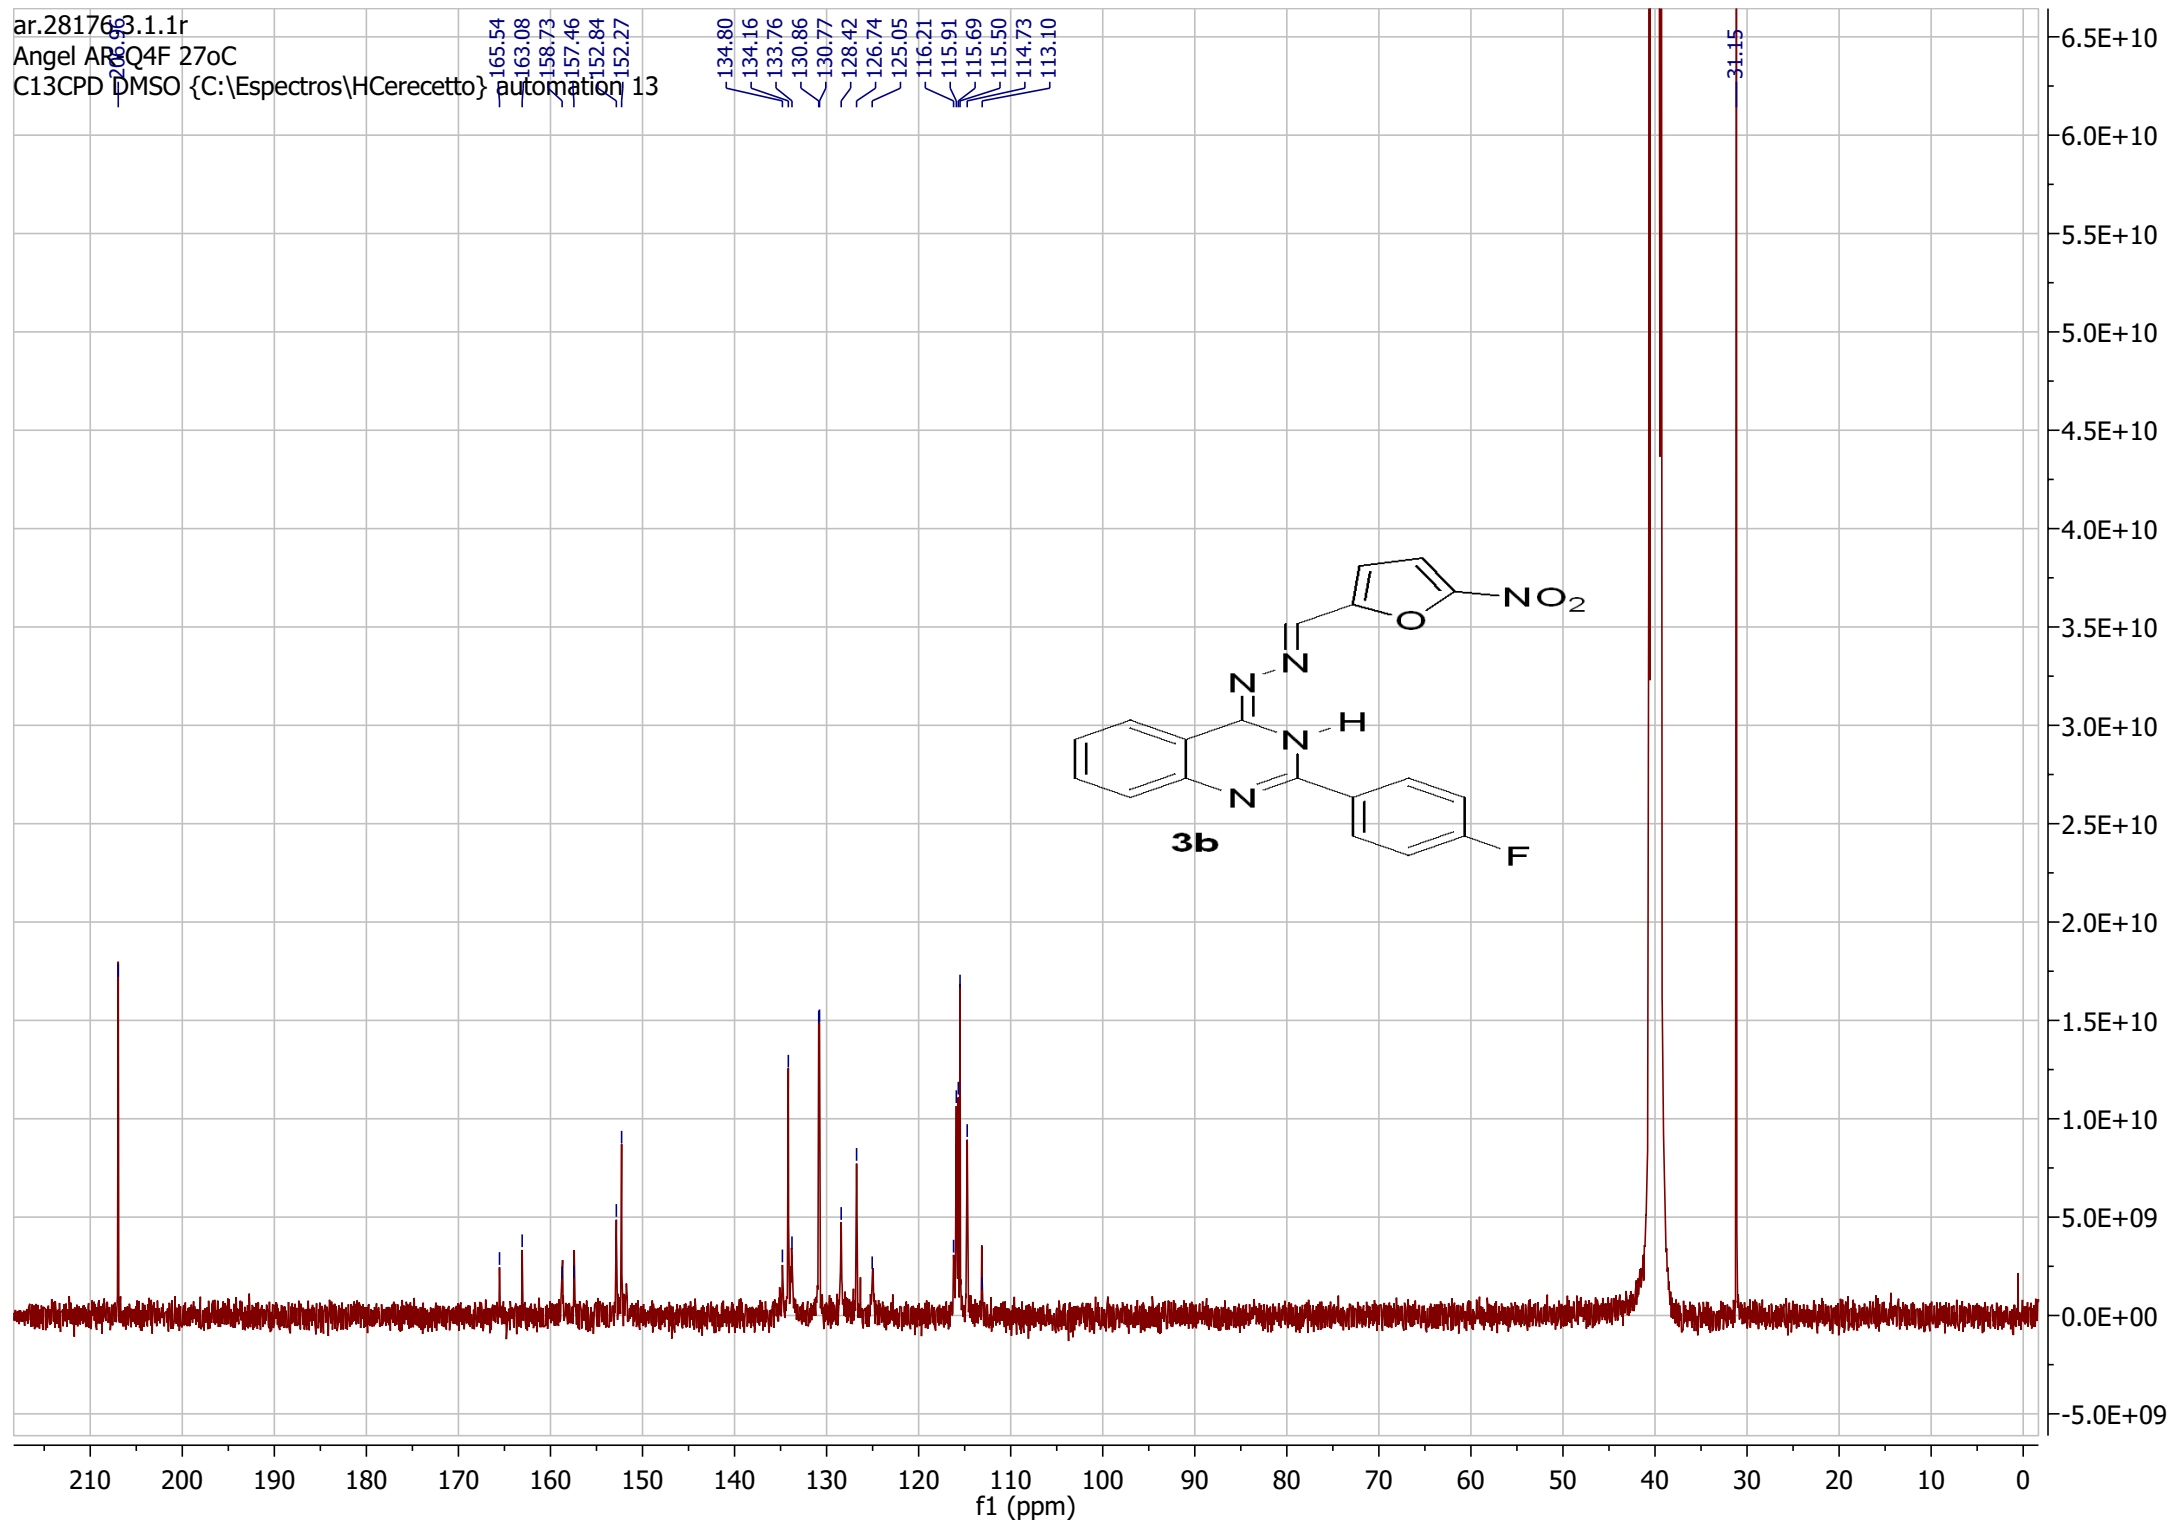

ar28176.3.1.1r  
Angel AR-Q4F 27oC  
C13CPD DMSO {C:\Espectros\HCerecetto} automation 13

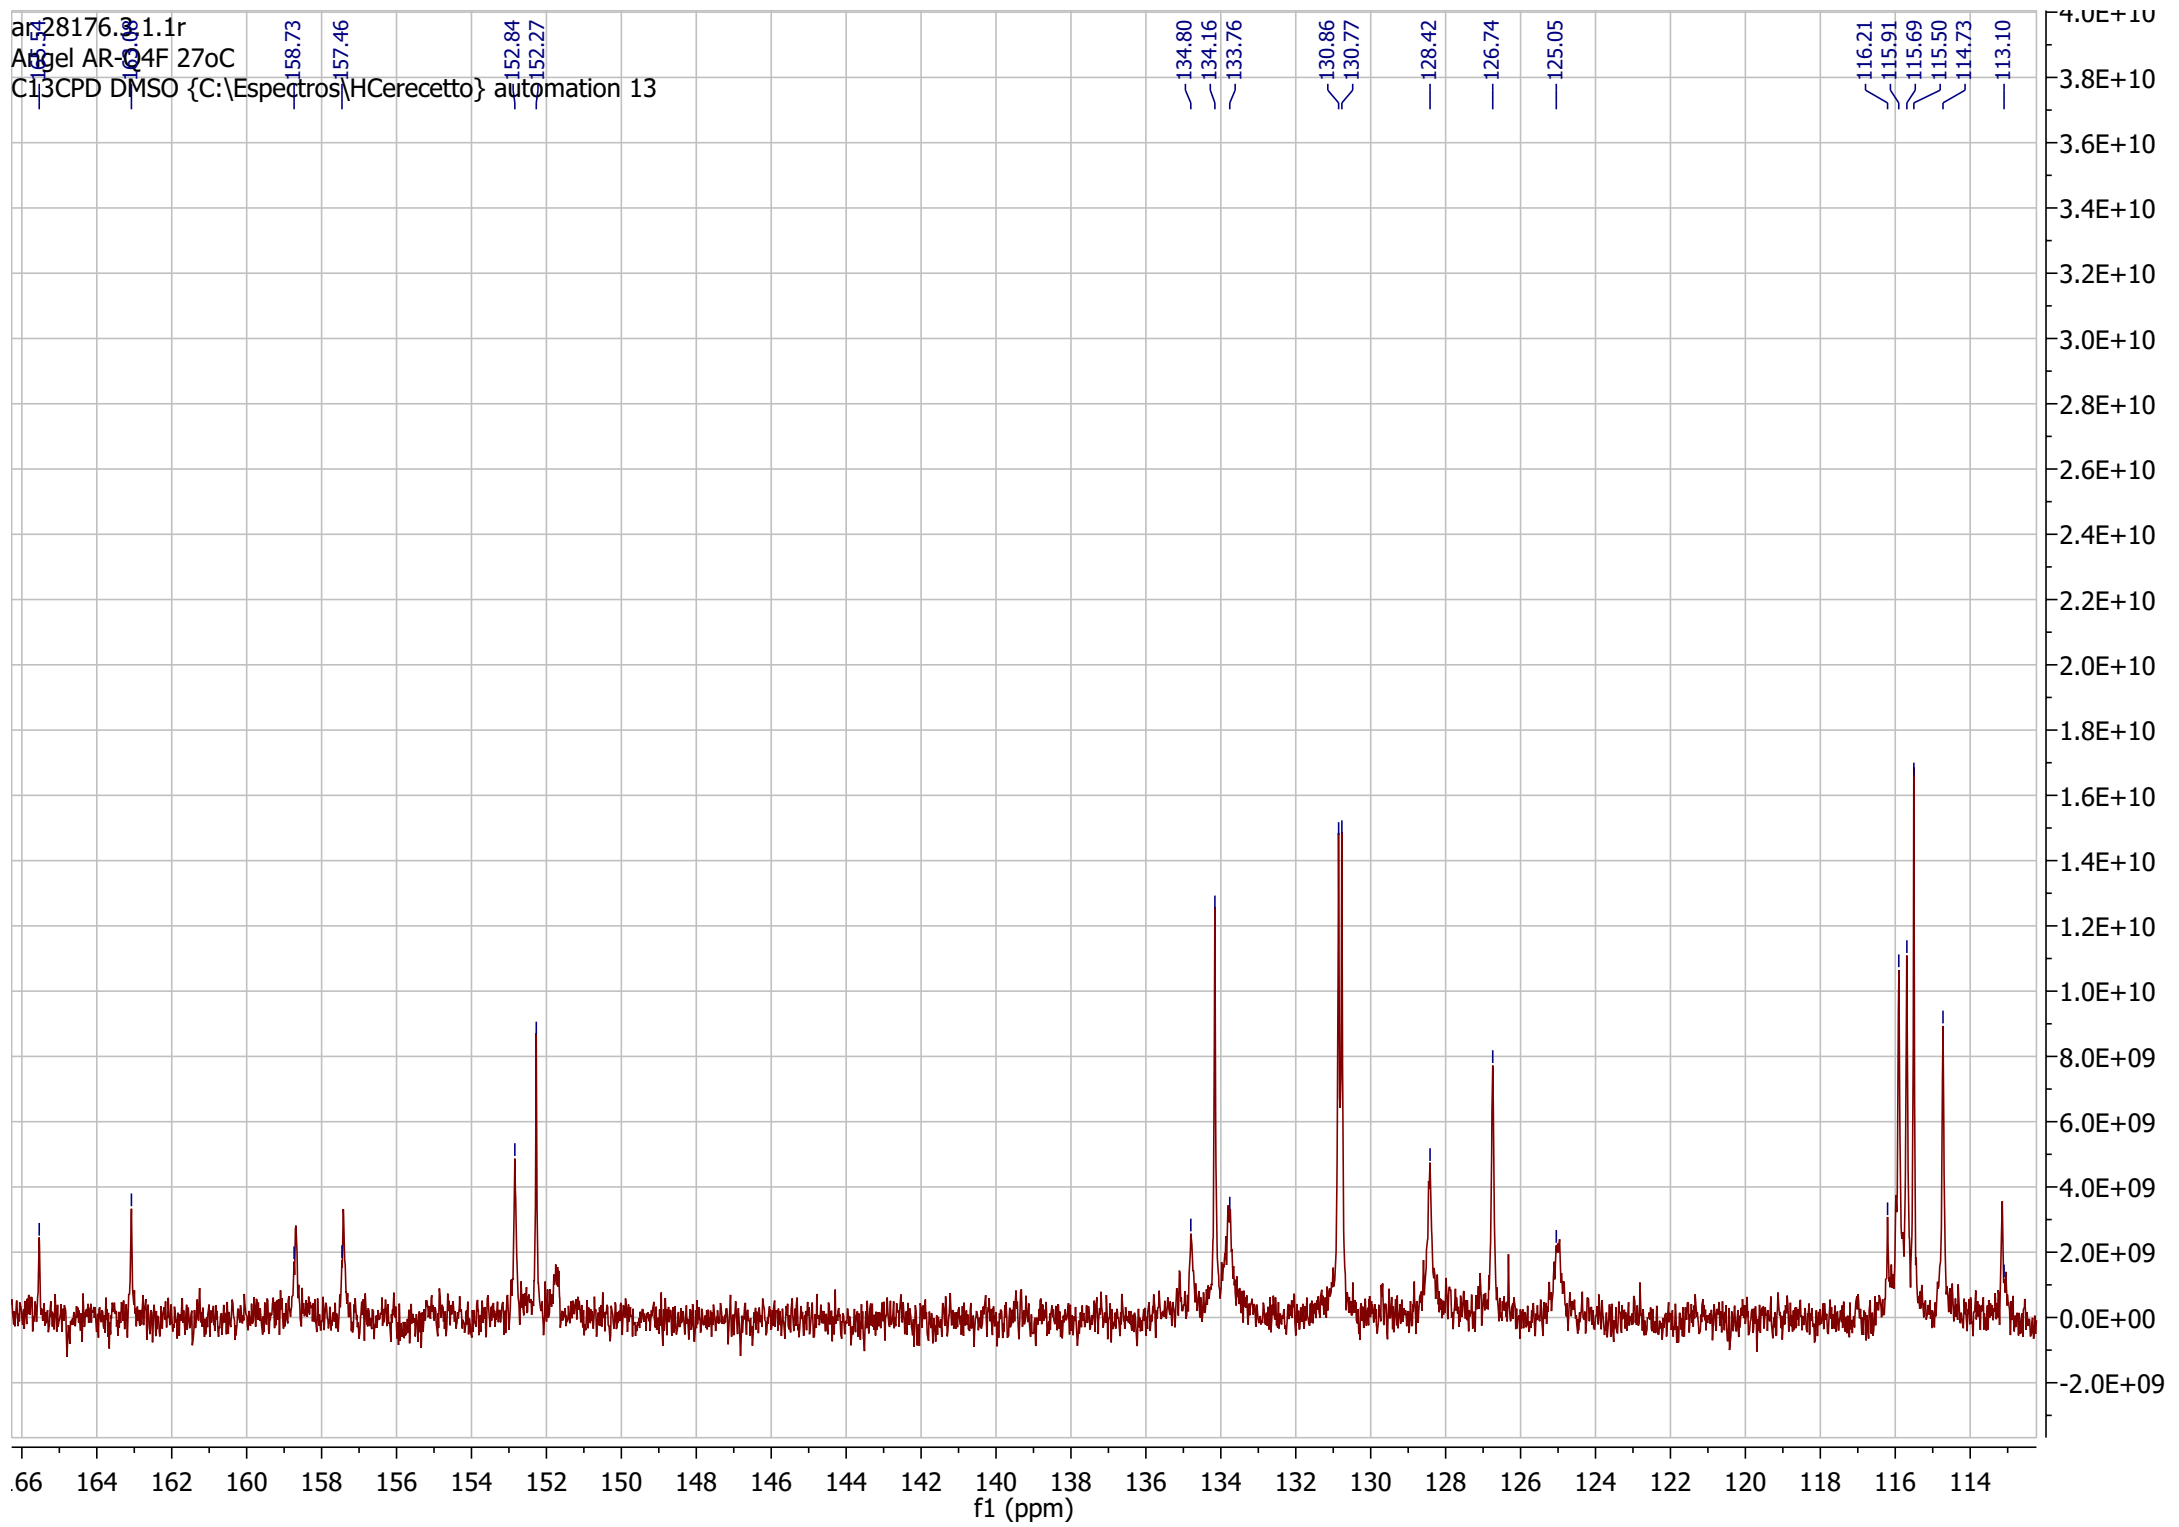

pdata/1  
Angel AR-Q4F 25oC  
19F DMSO {C:\Espectros\HCerecetto} automation 13

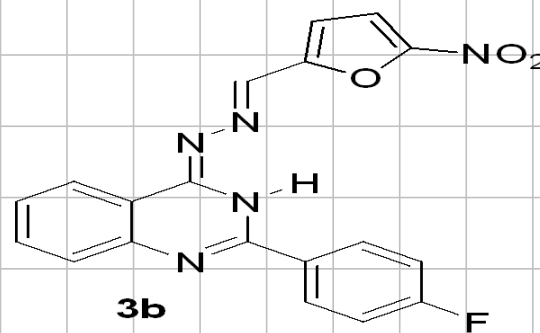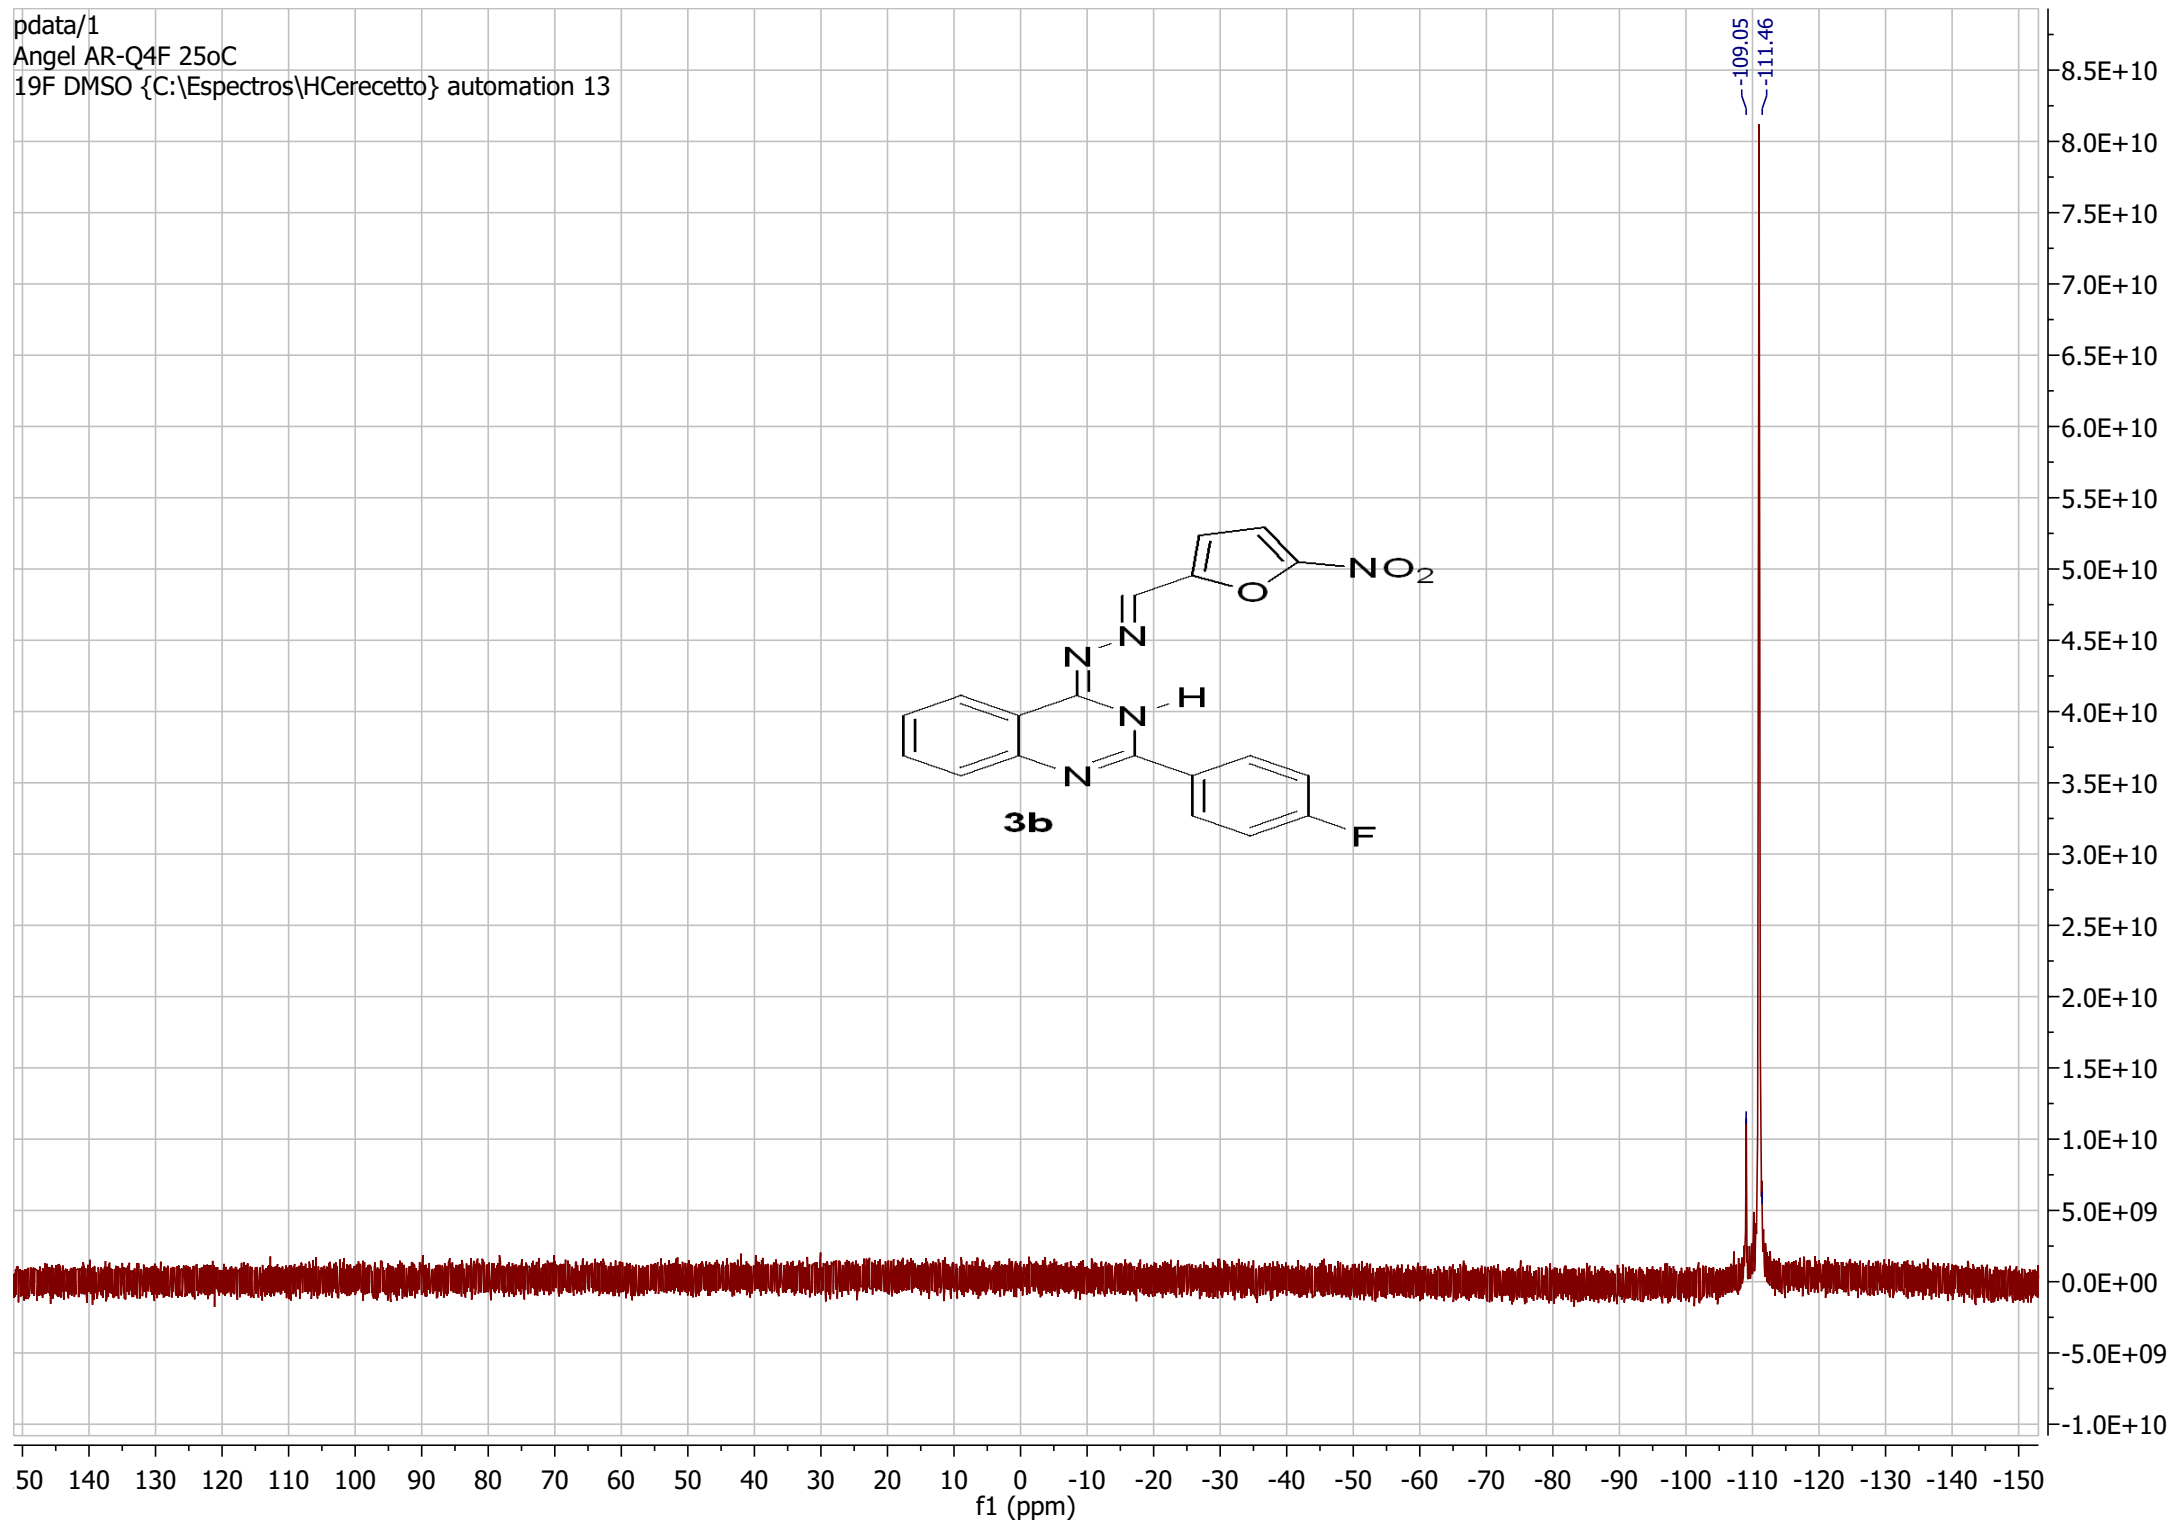



ar.28176.6.1.2rr  
Angel AR-Q4F 25oC (1/07)  
COSY DMSO {C:\Espectros\HCerecetto} automation 1

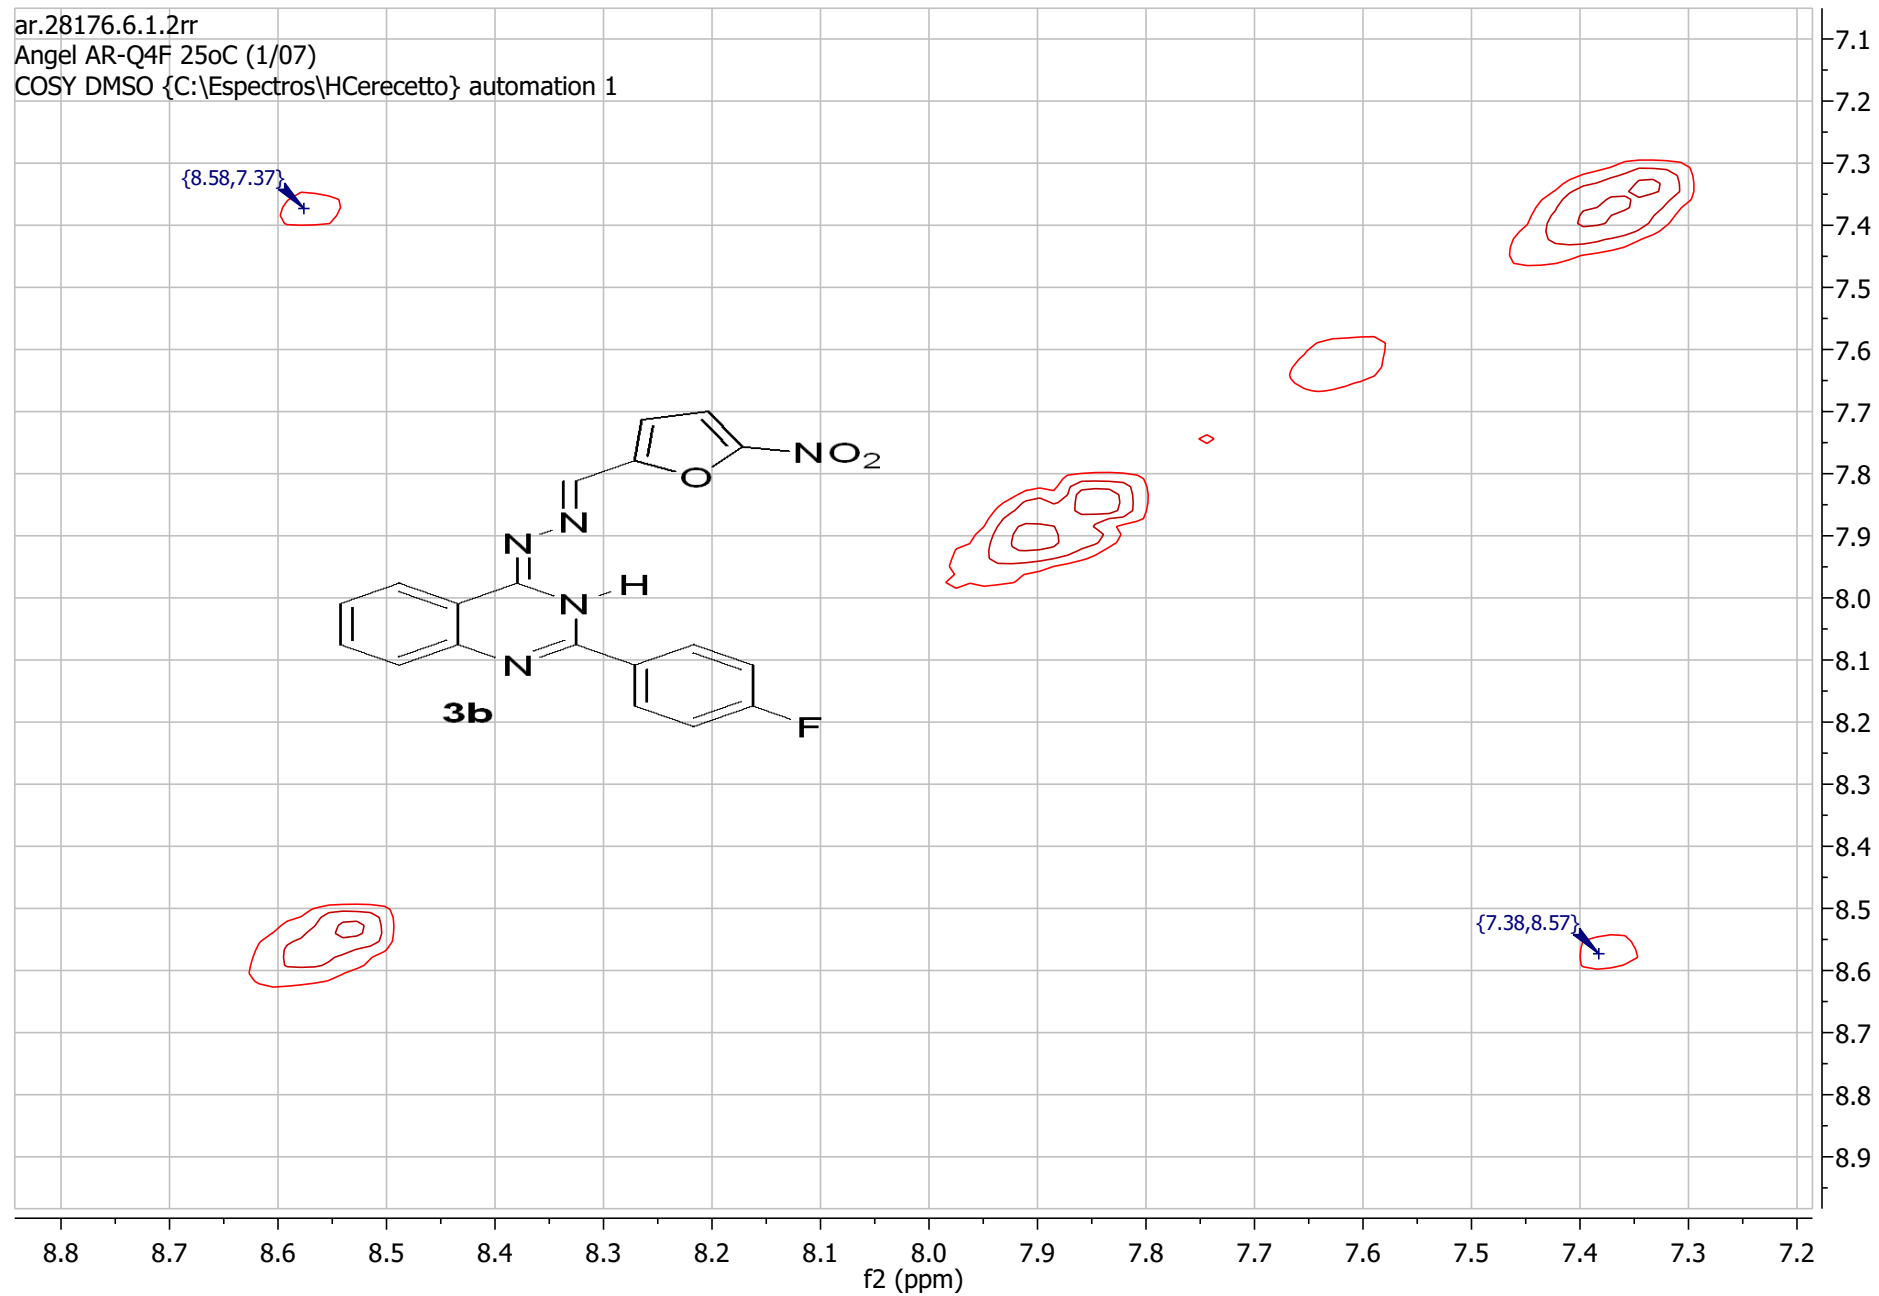

f1 (ppm)

f2 (ppm)

ar.28176.7.1.2rr  
Angel AR-Q4F 25oC (1/07)  
HSQC DMSO {C:\Espectros\HCerecetto} automation 1

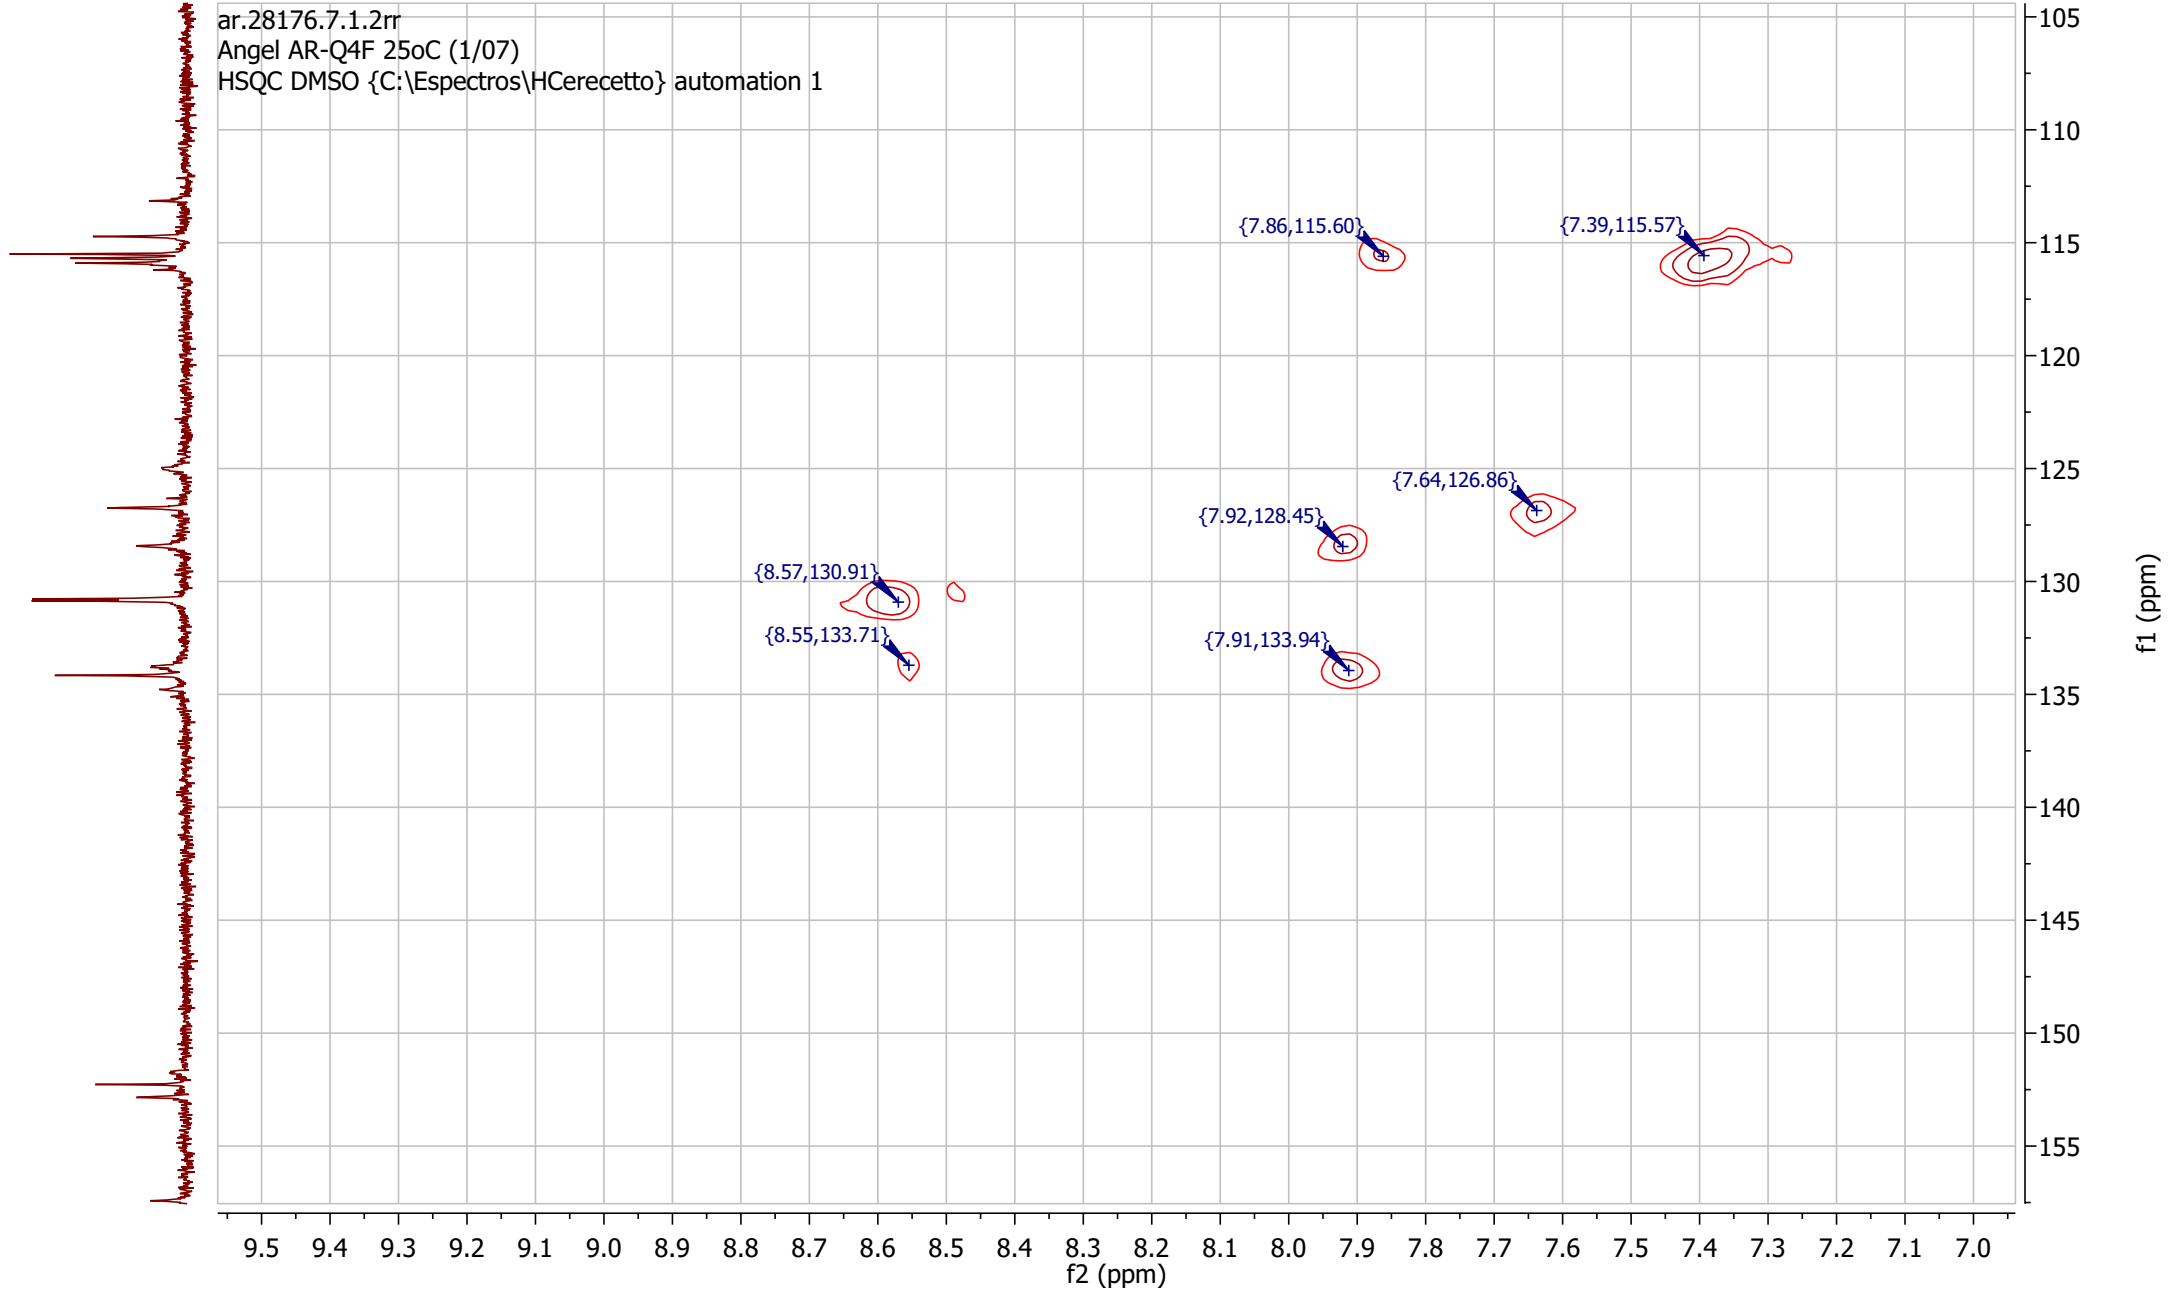

ar.28177.1.1.1r  
Angel AR-Q4CIF 27oC  
PROTON8 DMSO {C:\Espectros\HCerecetto} automation 4

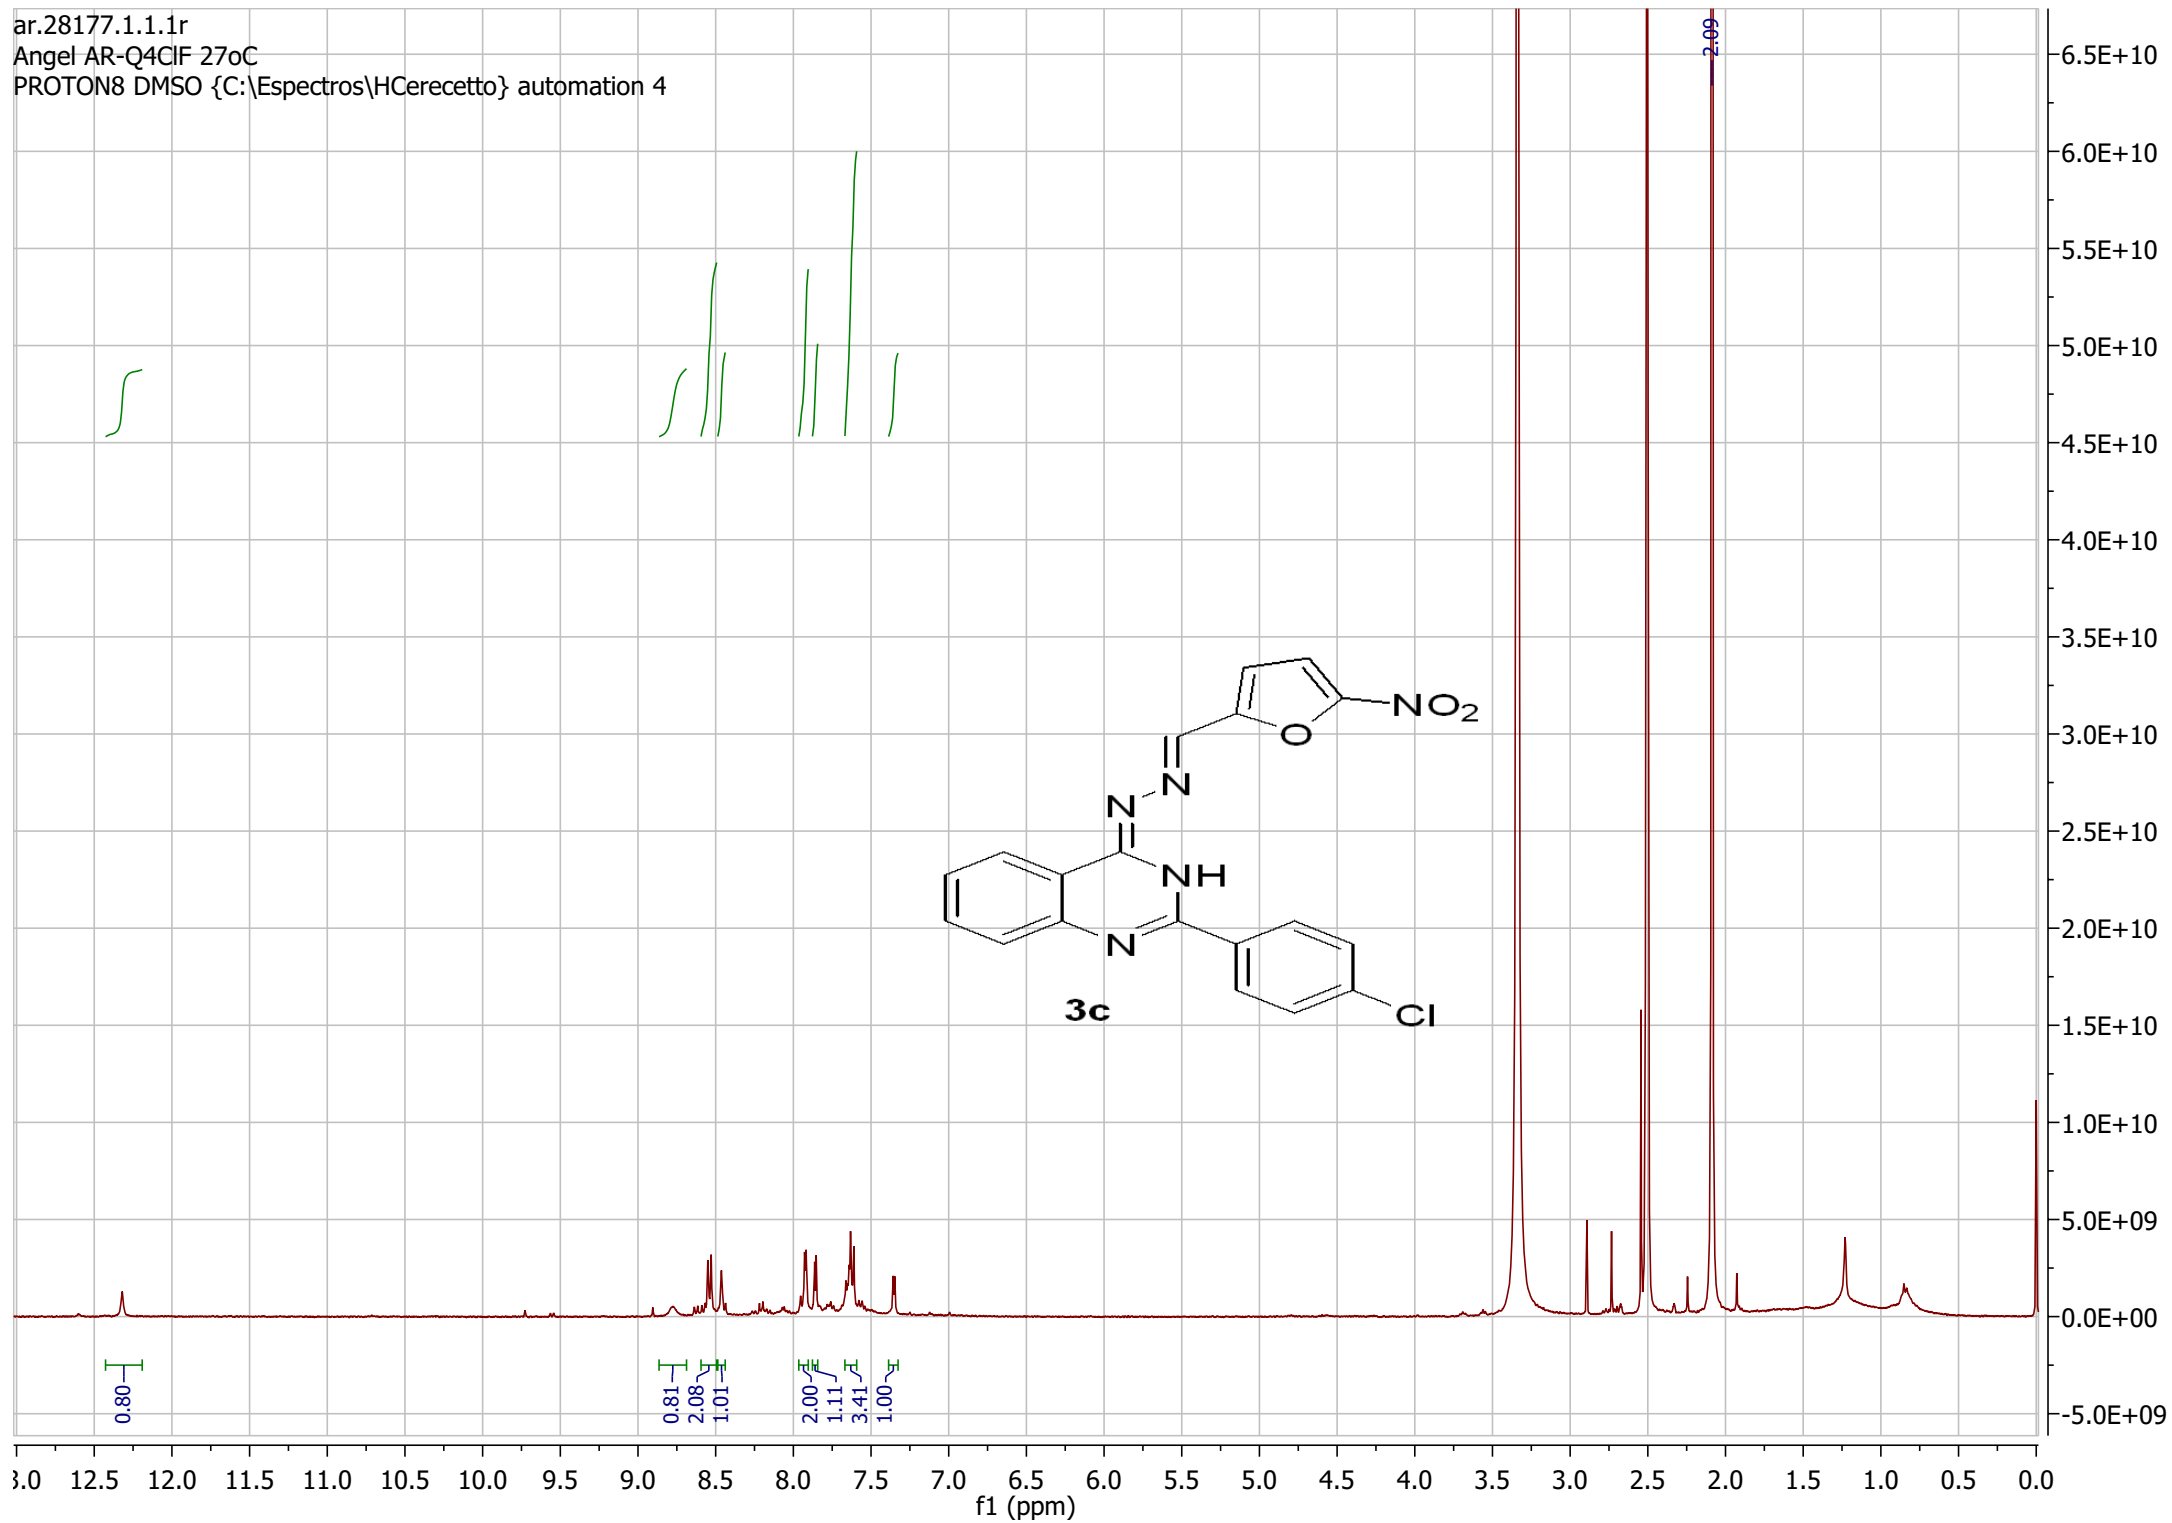

ar.28177.1.1.1r  
Angel AR-Q4CIF 27oC  
PROTON8 DMSO {C:\Espectros\HCerecetto} automation 4

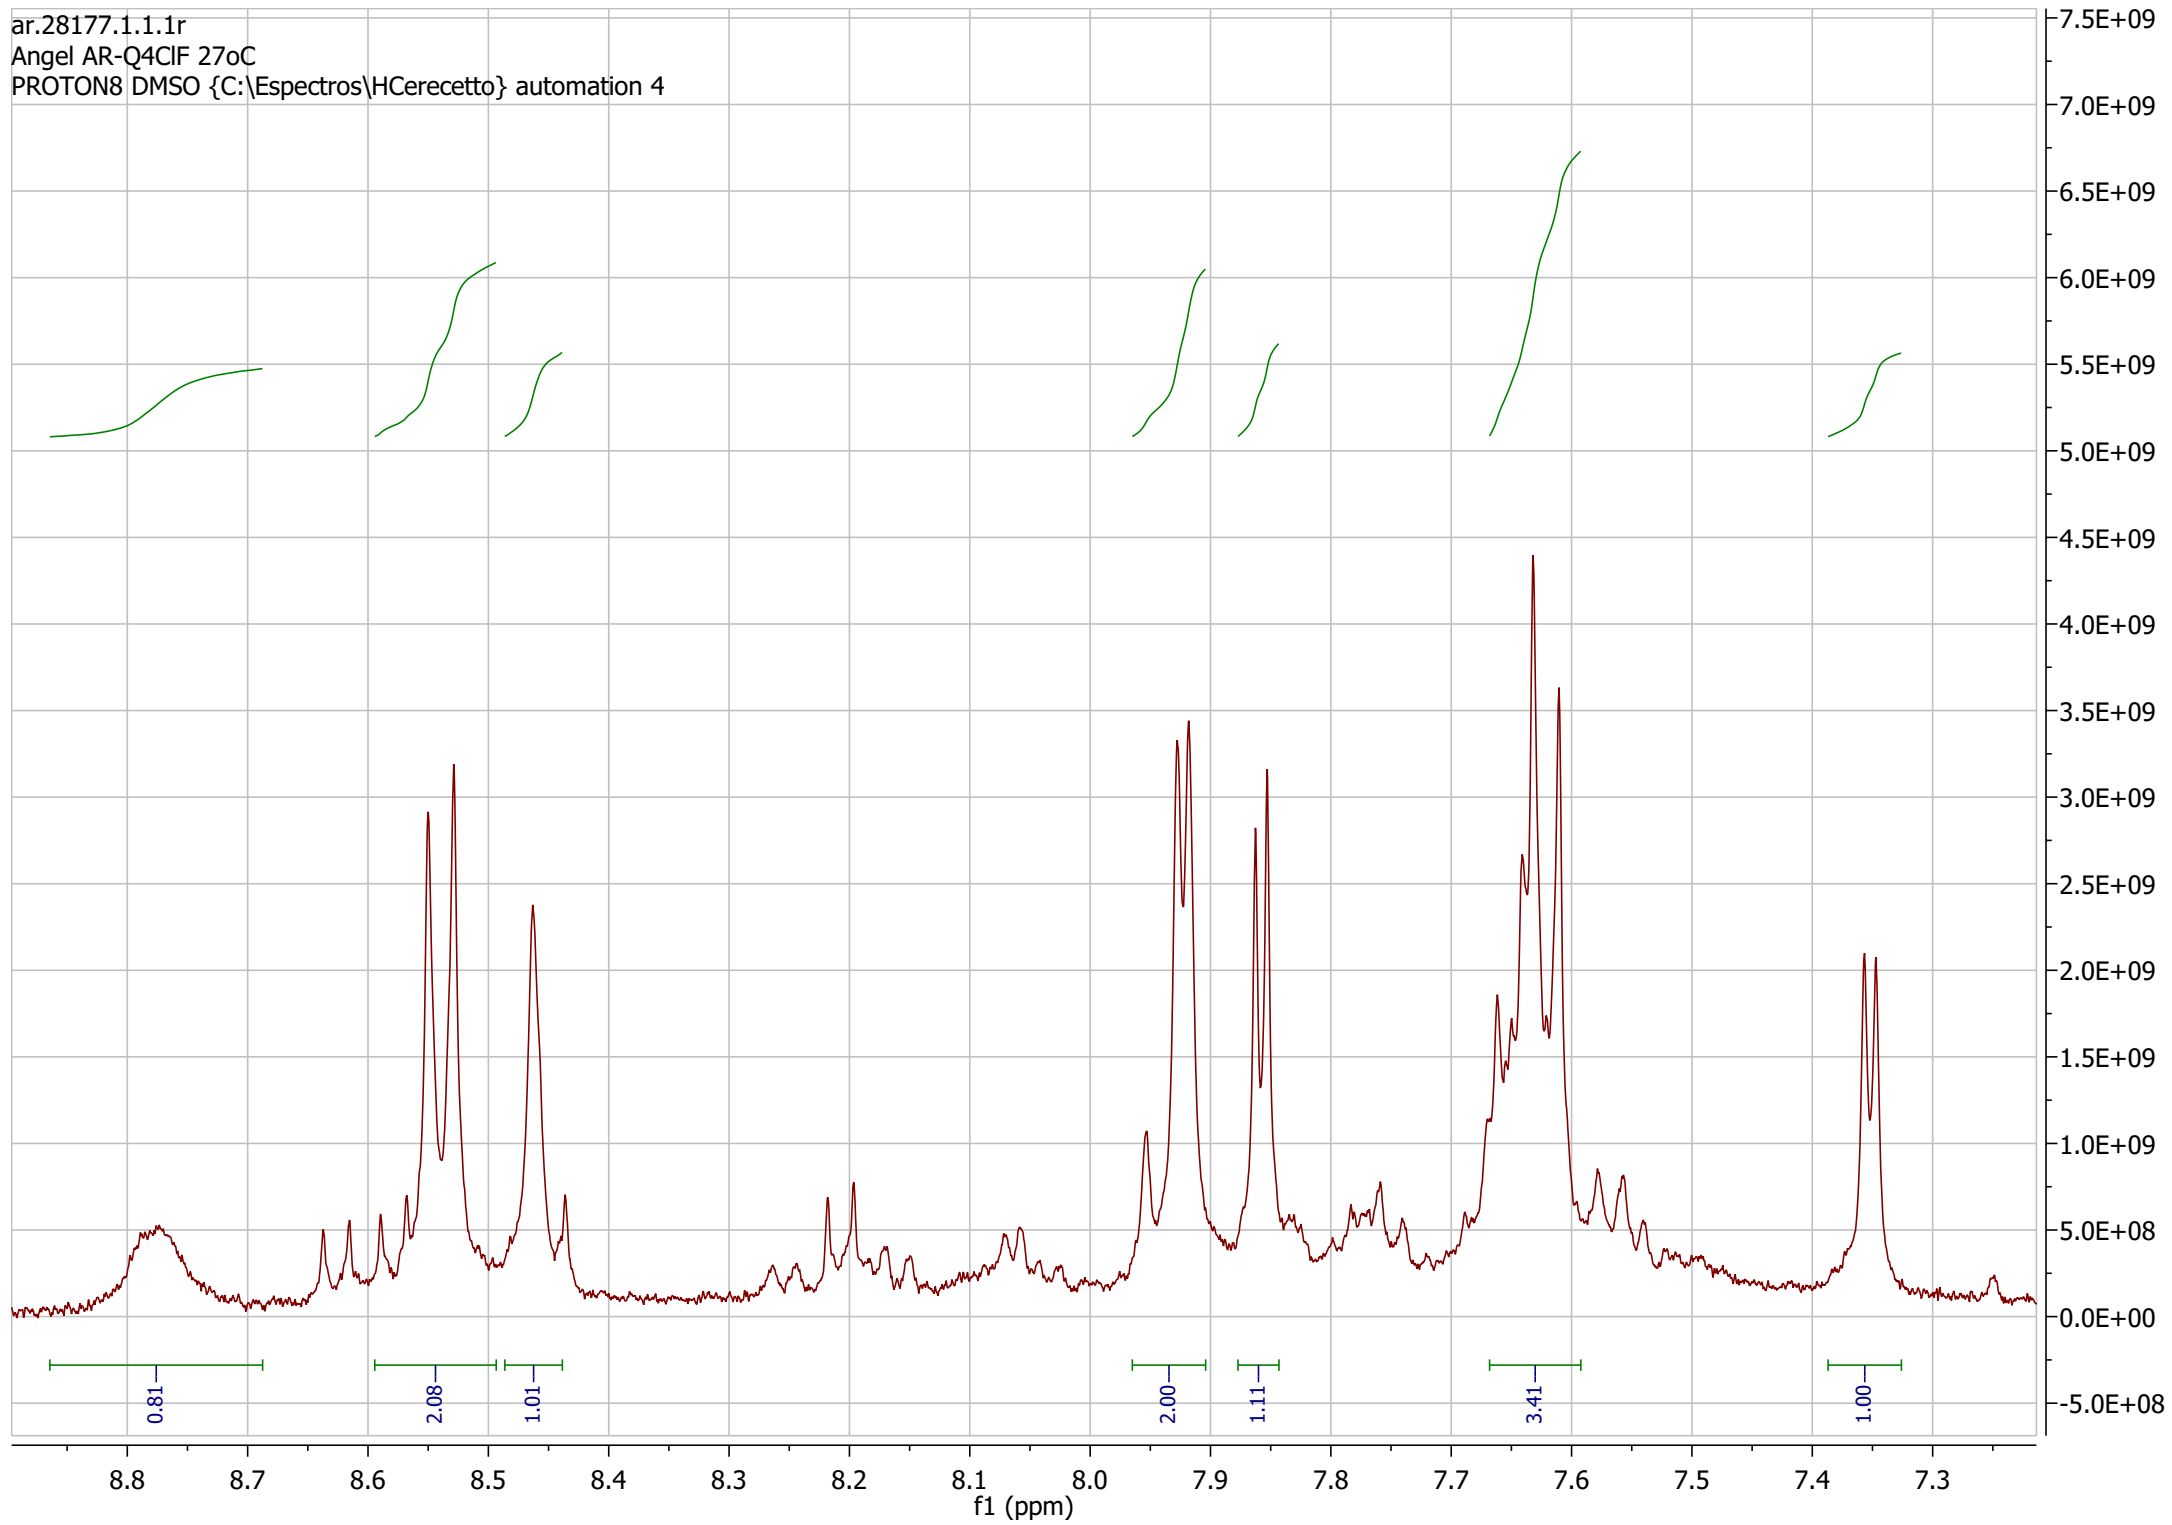

ar.28177.3.1.1r  
Angel AR-Q4CIF  
C13CPD DMSO {C:\Espectros\HCerecetto} automation 9

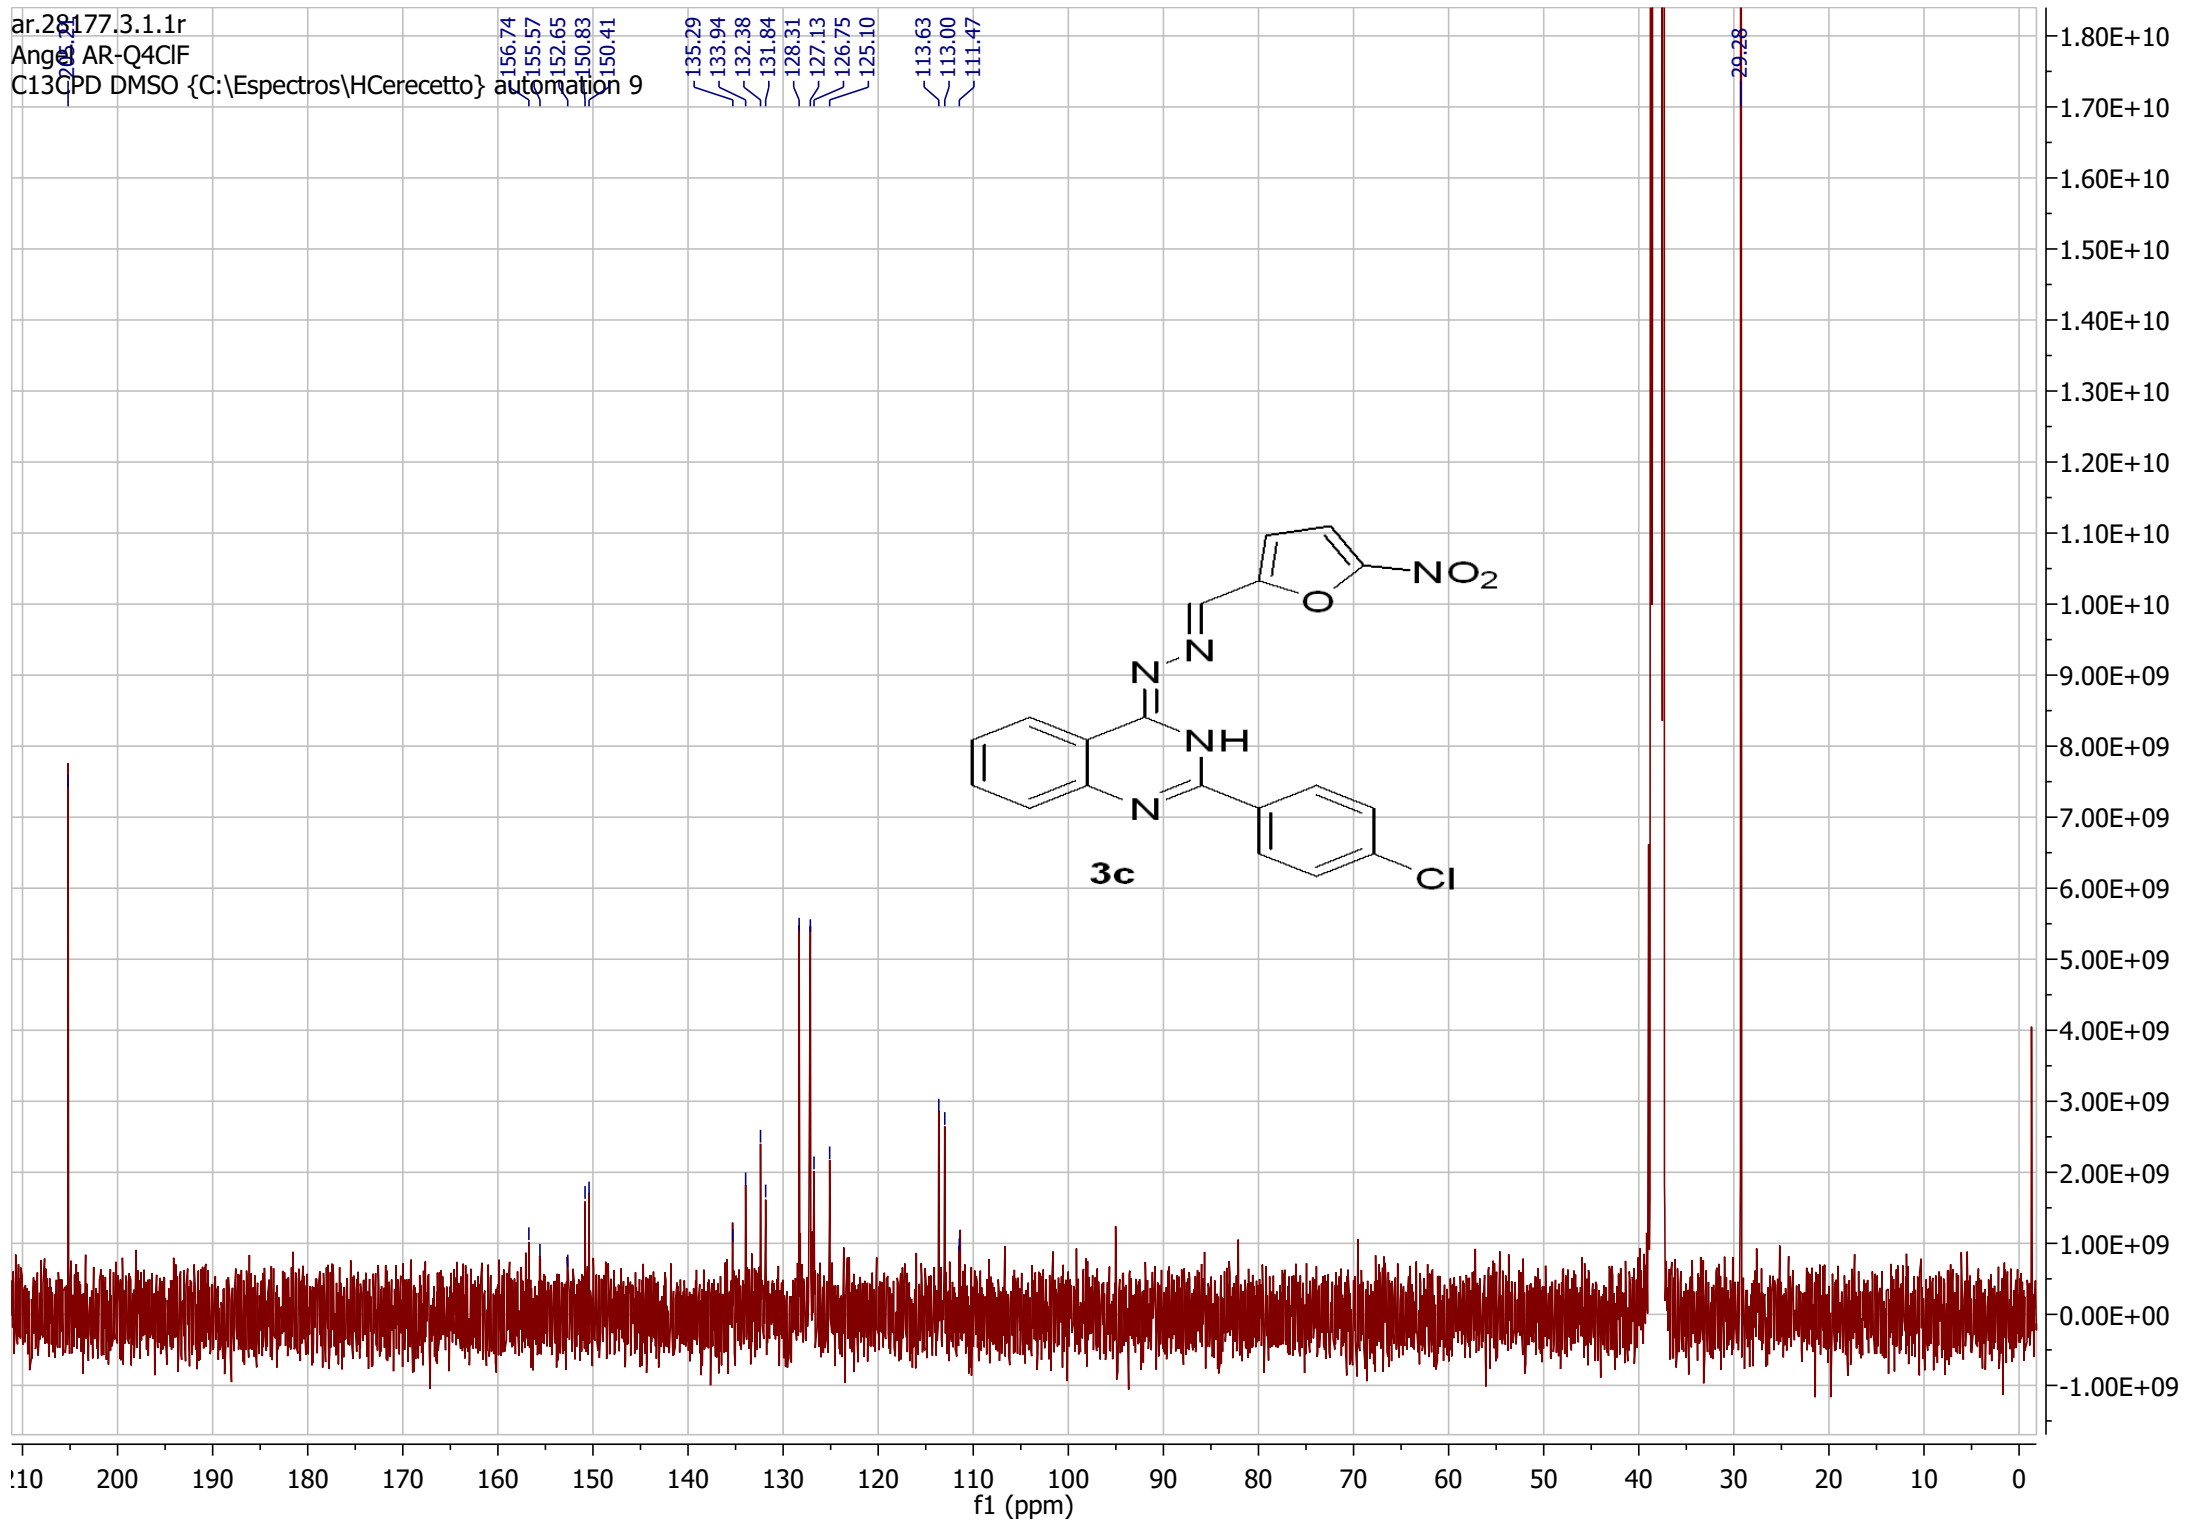

ar.28177.3.1.1r  
Angel AR-Q4CIF  
C13CPD DMSO {C:\Espectros\H\erecetto} automation 9

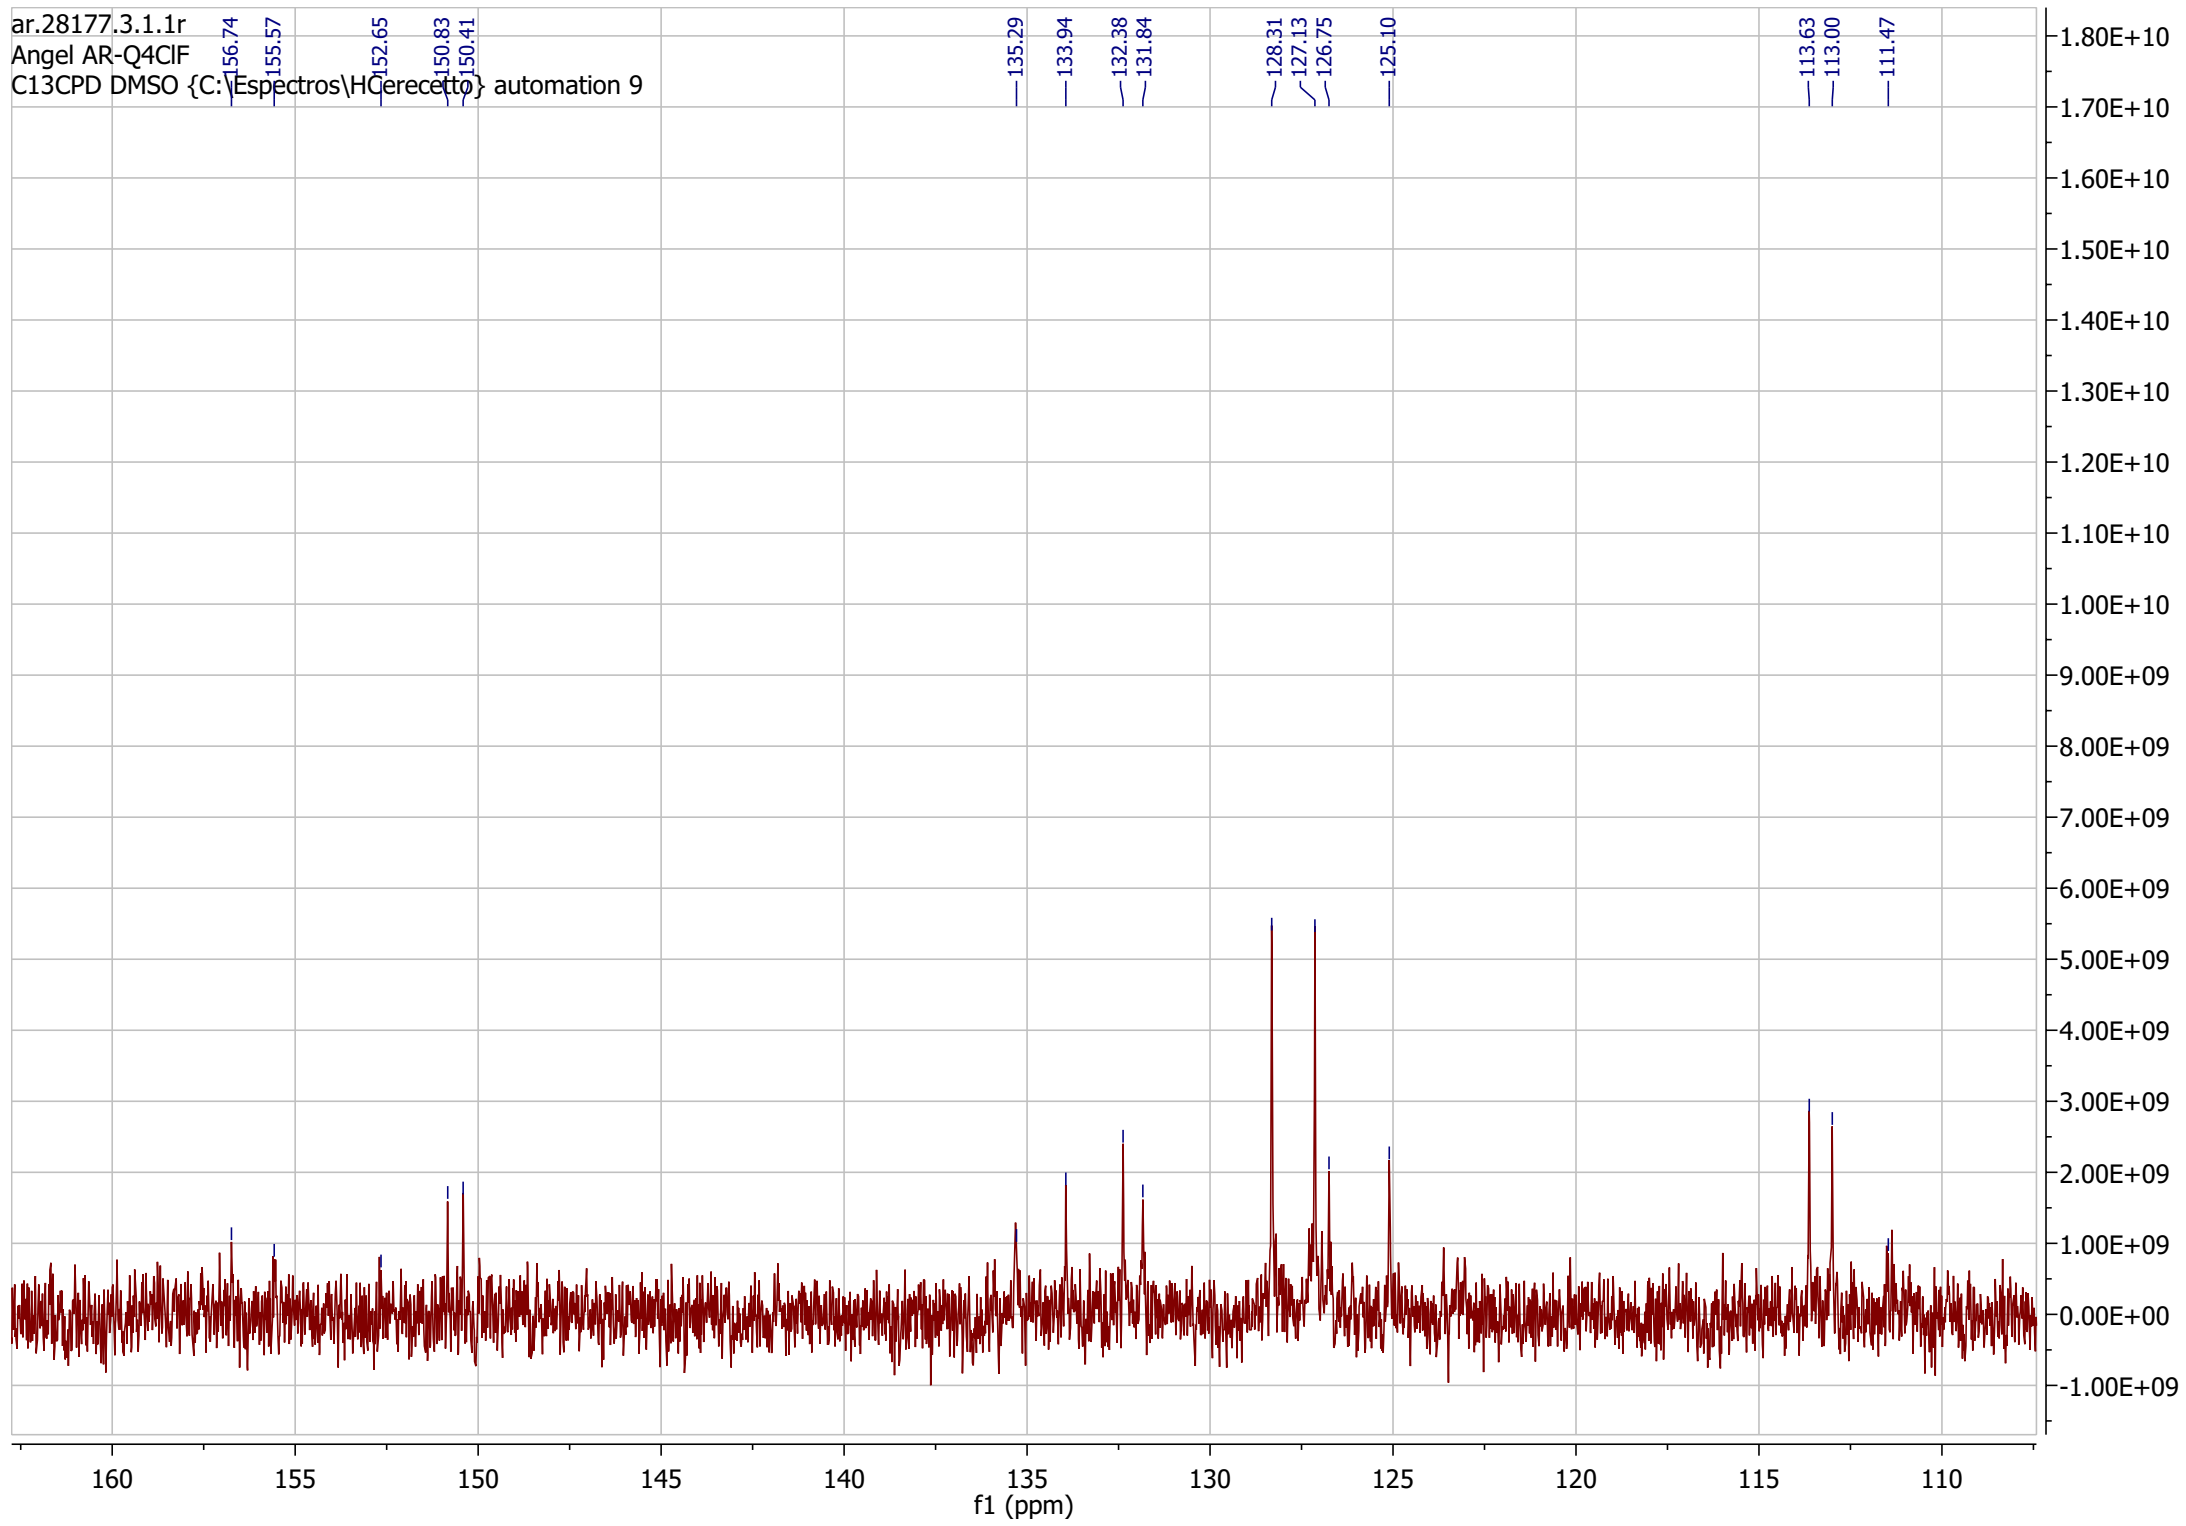

ar.28177.5.1.2rr  
AR Q4Cl final  
COSY DMSO {C:\Especros\HCerecetto} automation 5

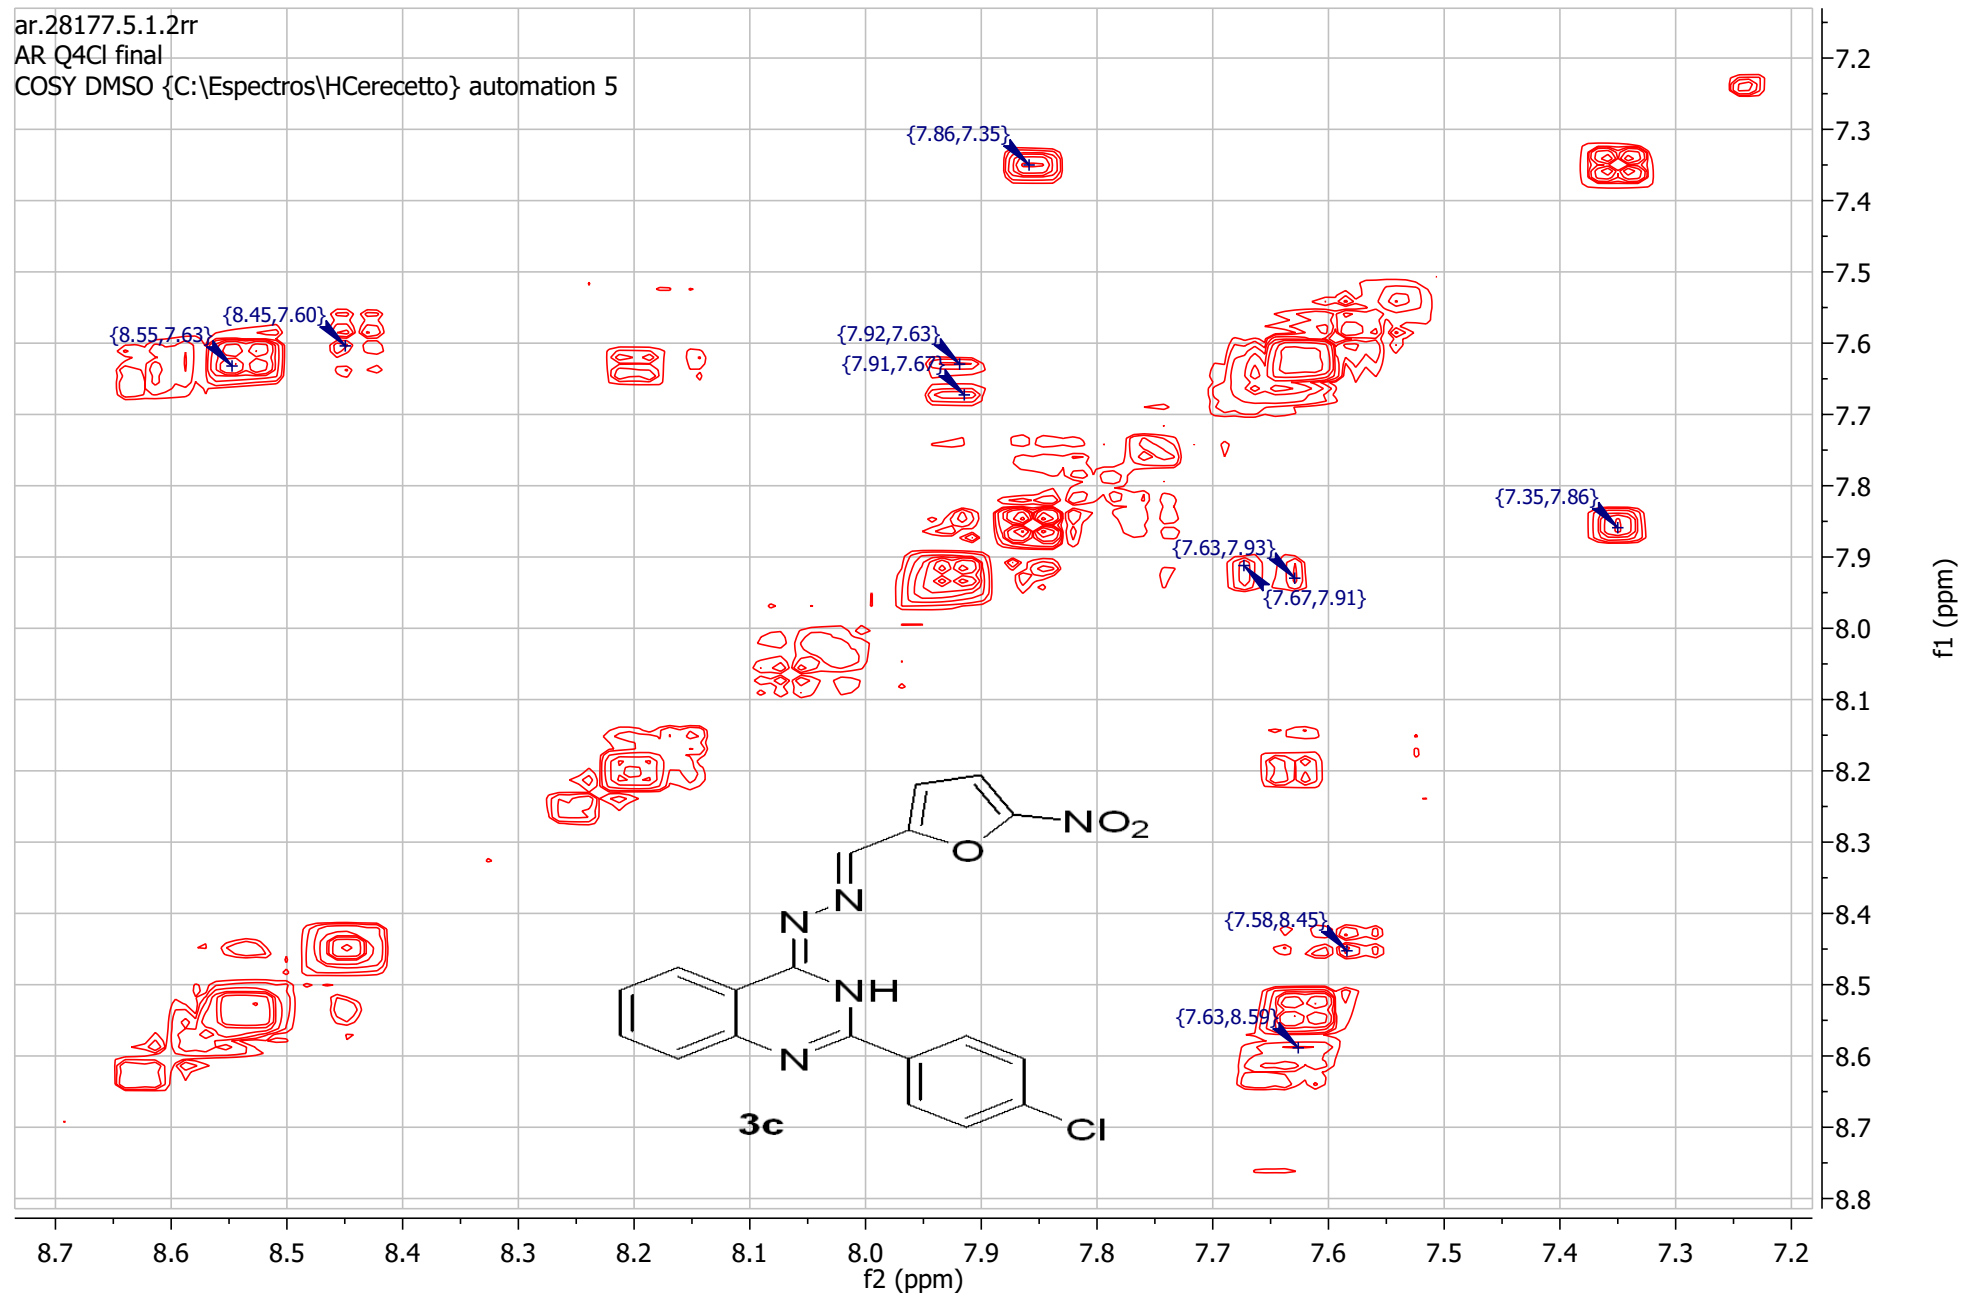

3c

f1 (ppm)

f2 (ppm)

ar.28296.1.1.1r  
Angel AR-Q4Brf  
PROTON8 DMSO {C:\Spectros\HCerecetto} automation 3

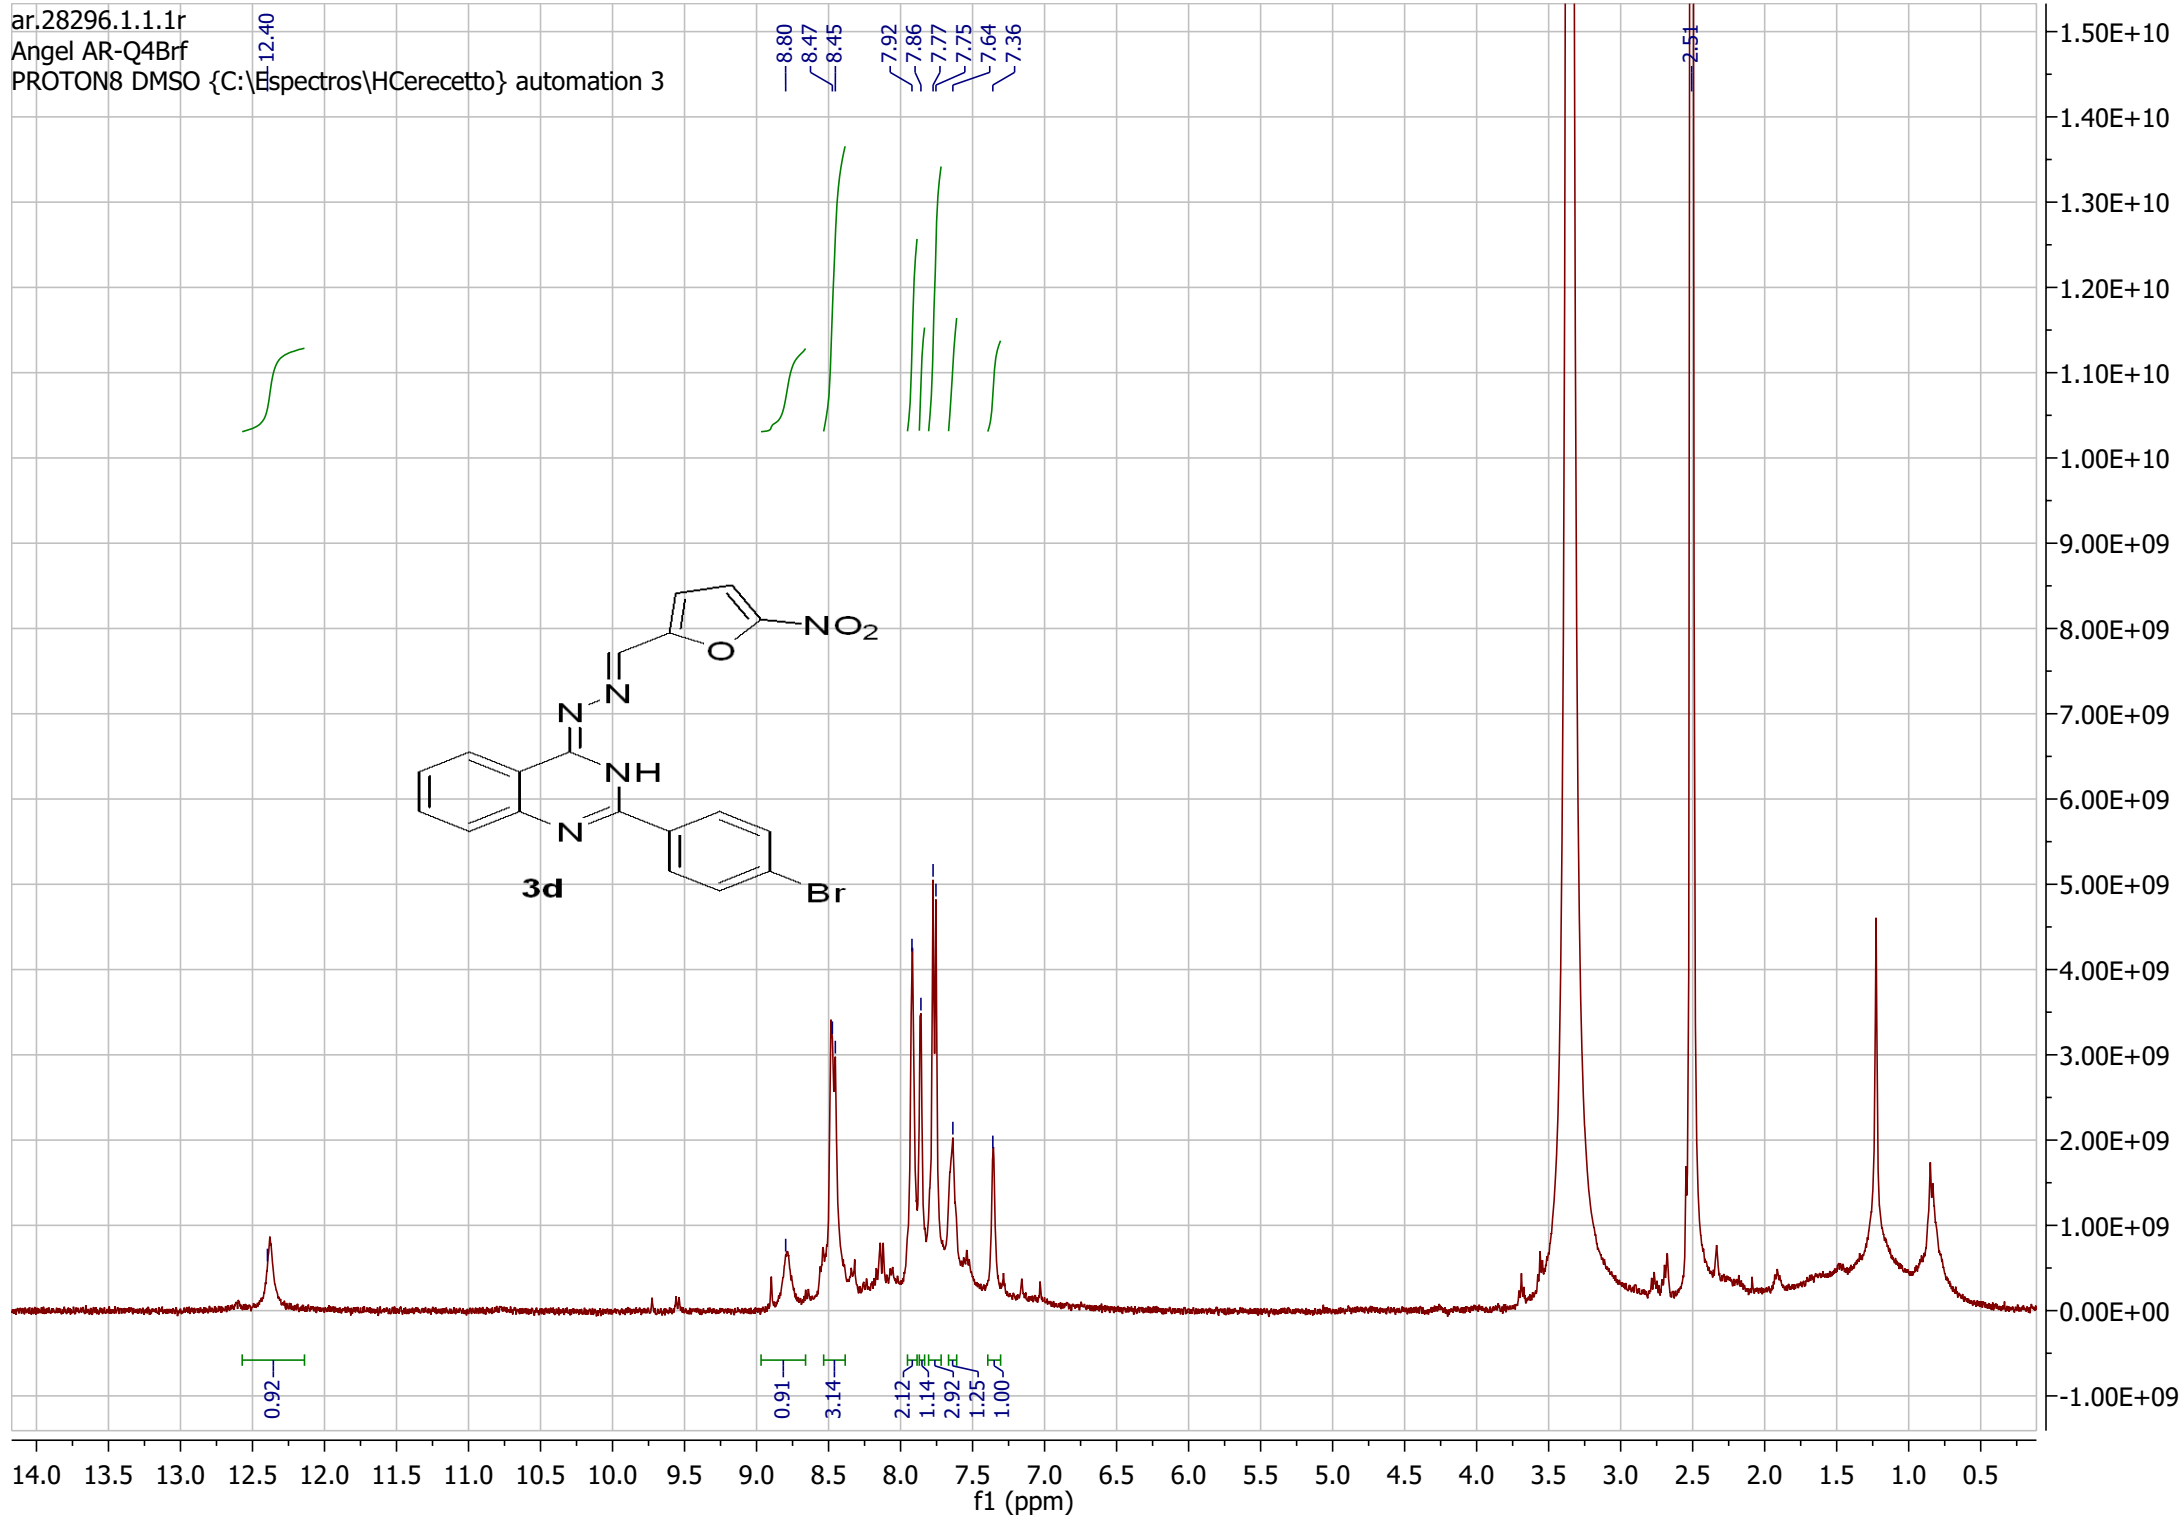



ar.28296\_1.1r  
Angel AR4Q4Brf  
PROTON8 DMSO {C:\Espectros\HCerecetto} automation 3

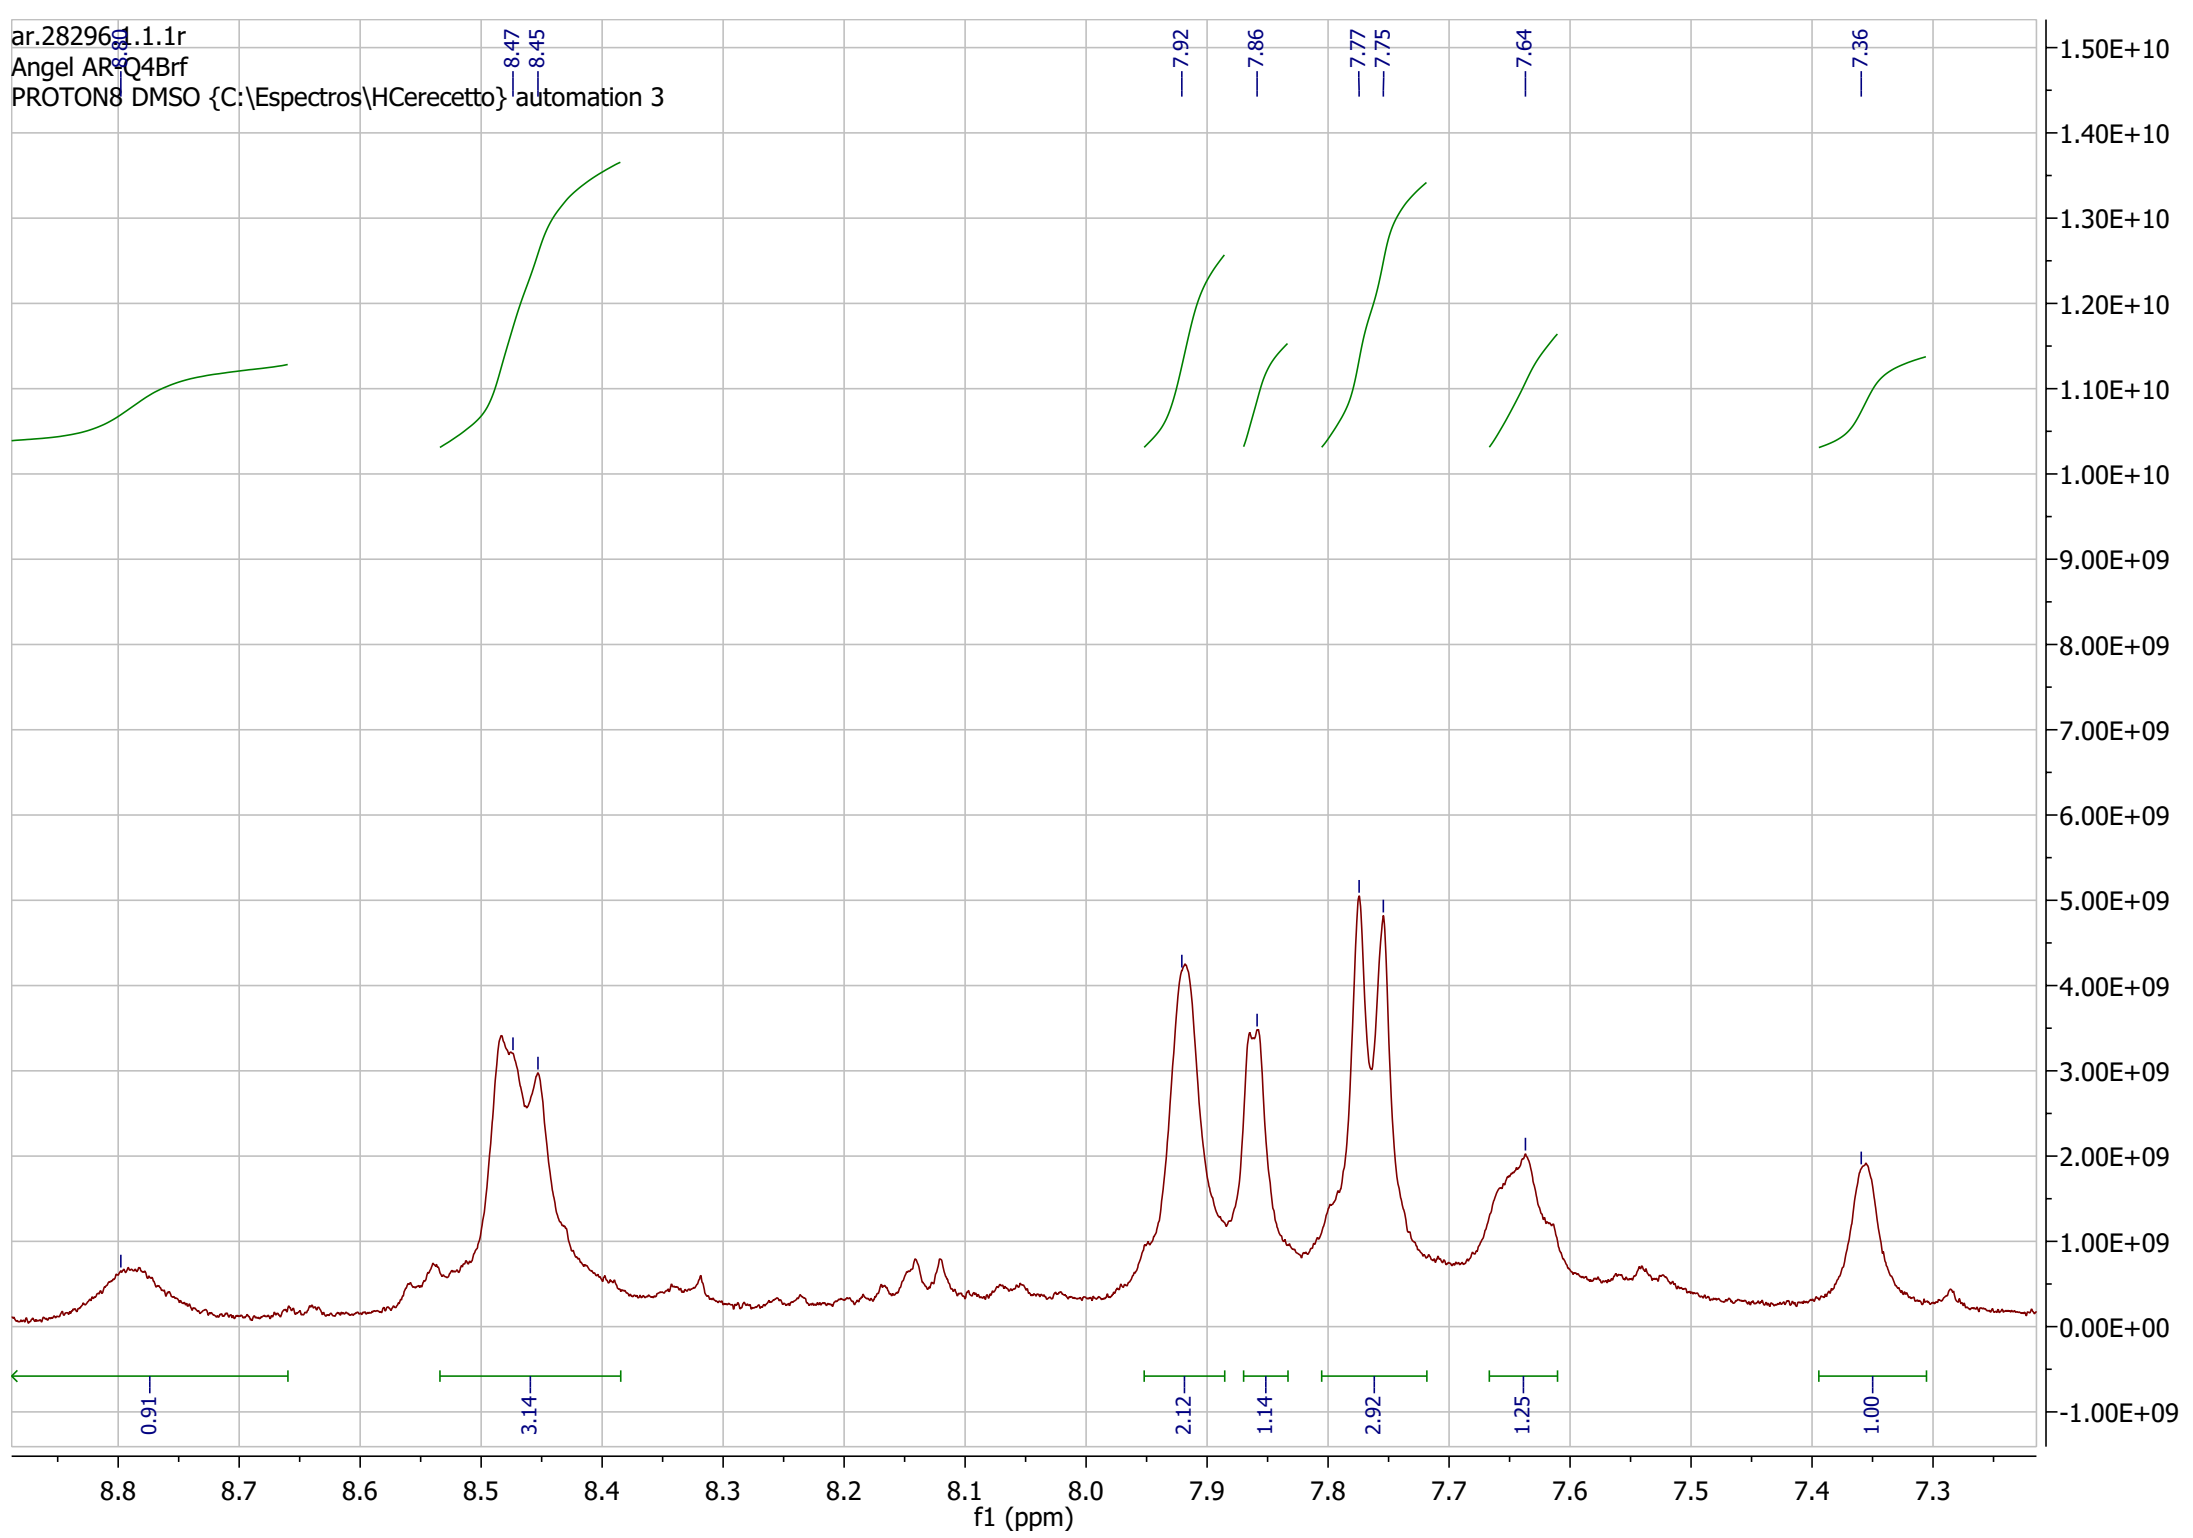

ar.28296.8.1.1r  
AR-4BrQf  
C13CPD DMSO {C:\Espectros\HCerecetto} automation 15

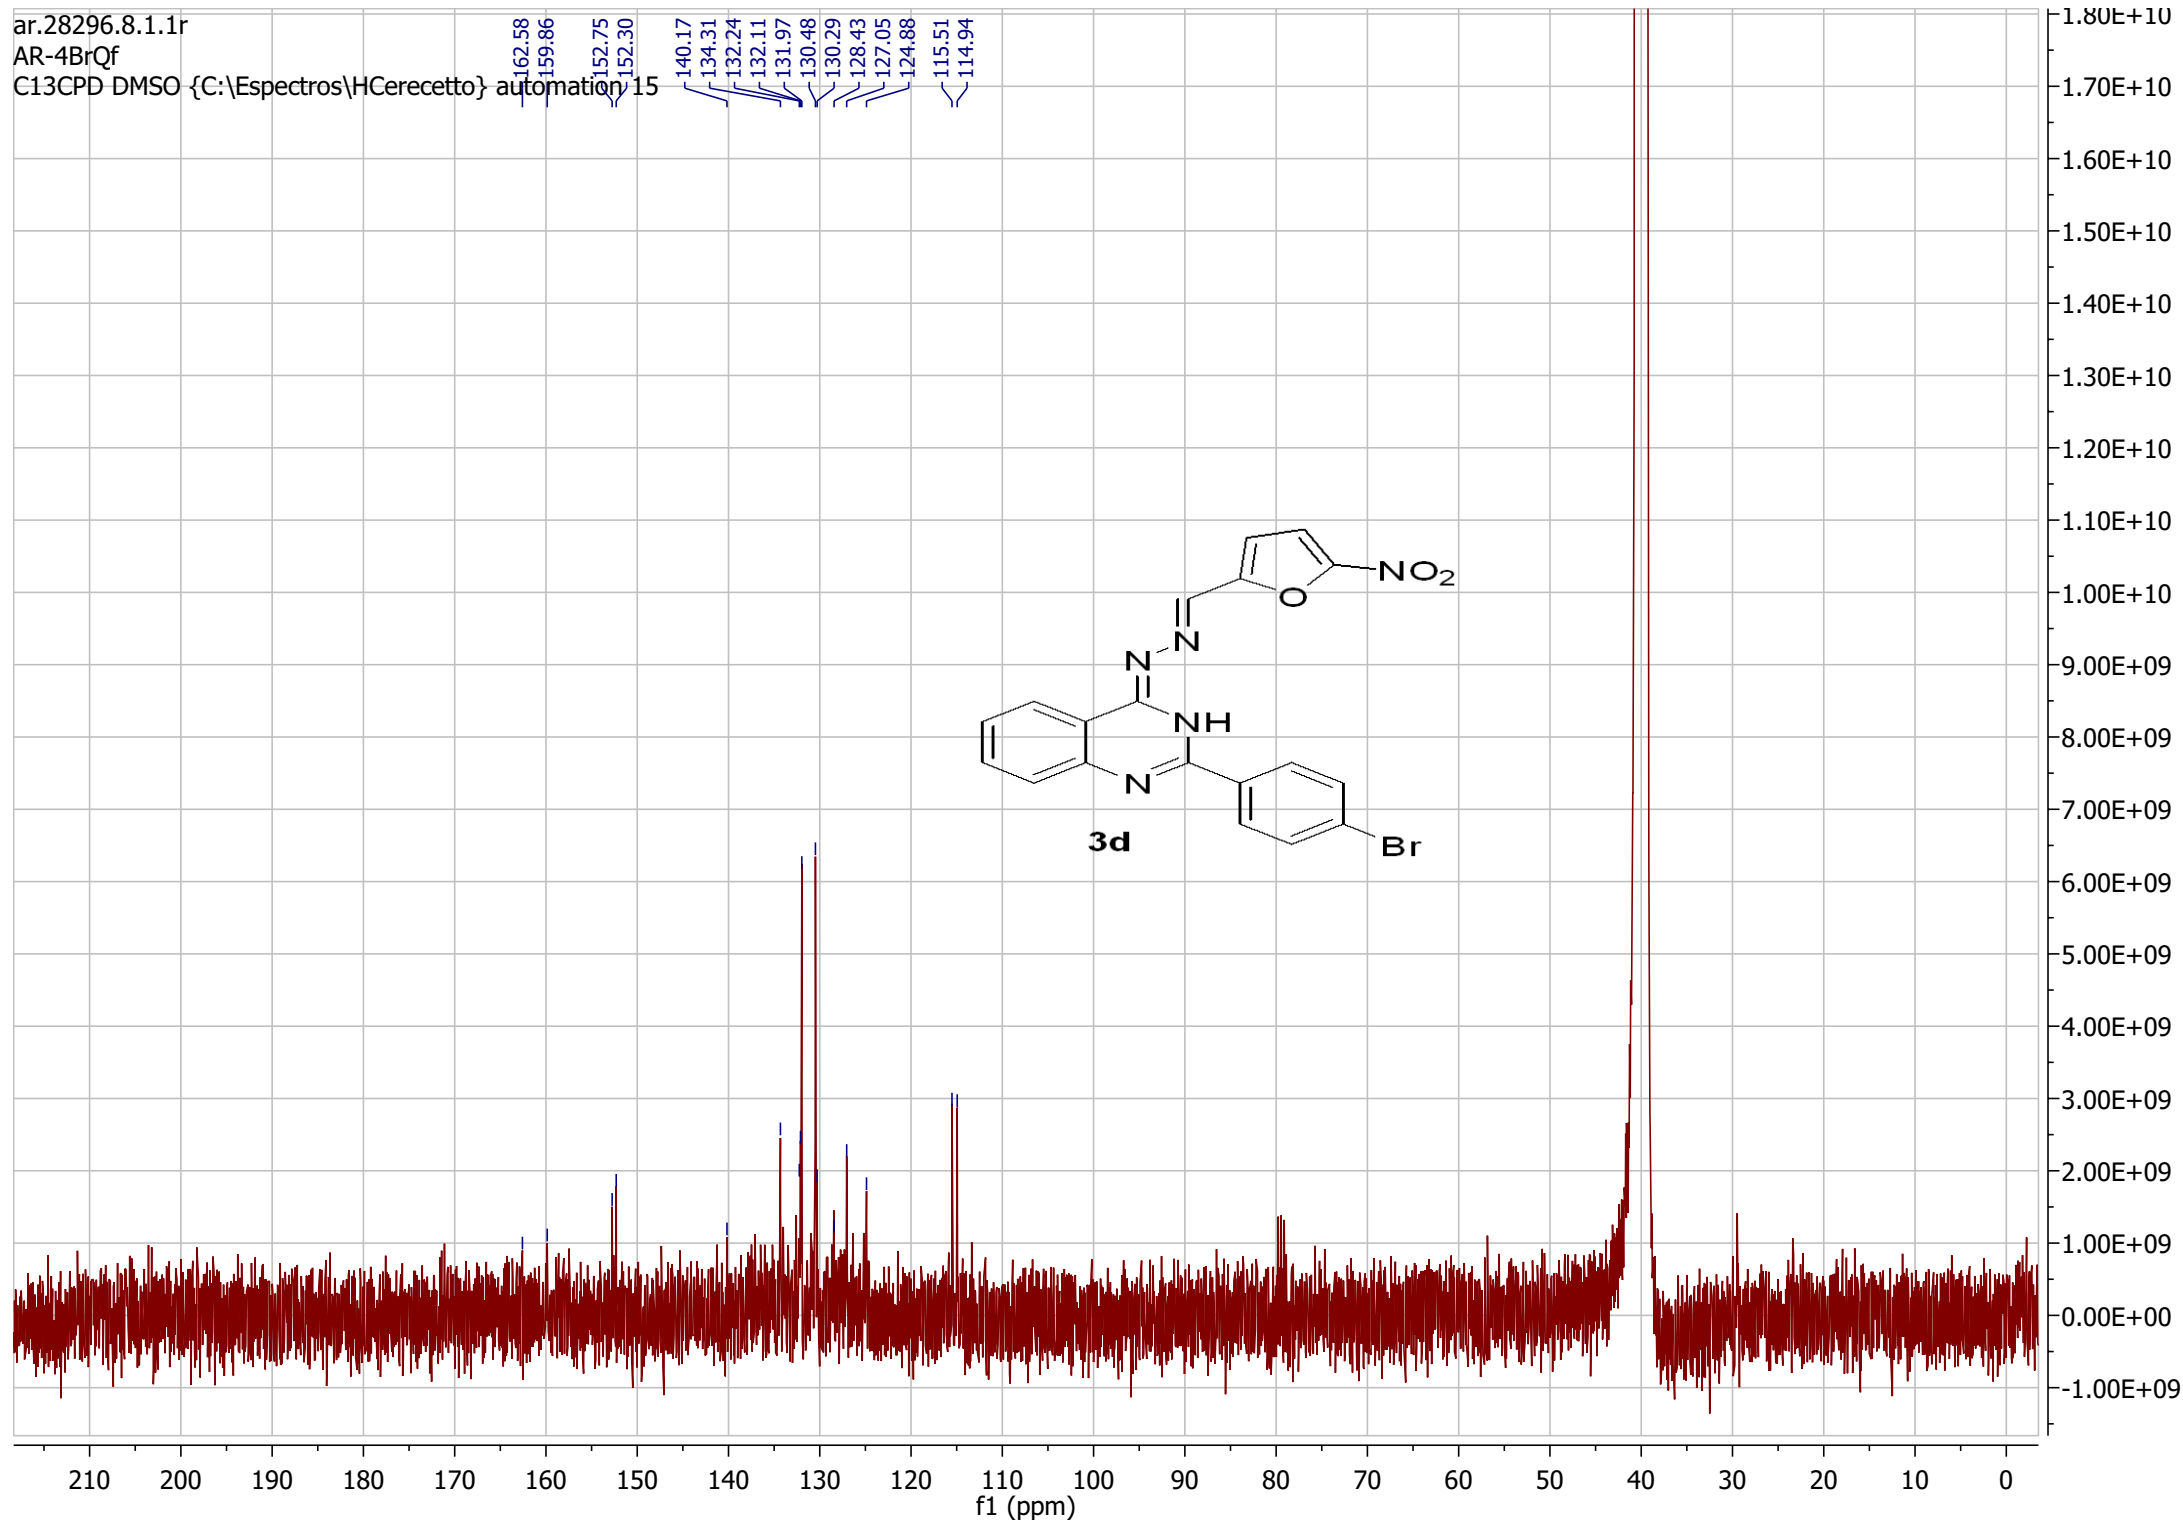

162.58  
159.86  
152.75  
152.30  
140.17  
134.31  
132.24  
132.11  
131.97  
130.48  
130.29  
128.43  
127.05  
124.88  
115.51  
114.94

ar.28296.8.1.1r  
AR-4BrQf  
C13CPD DMSO {C:\Espectros\HCeregetto} automation 15

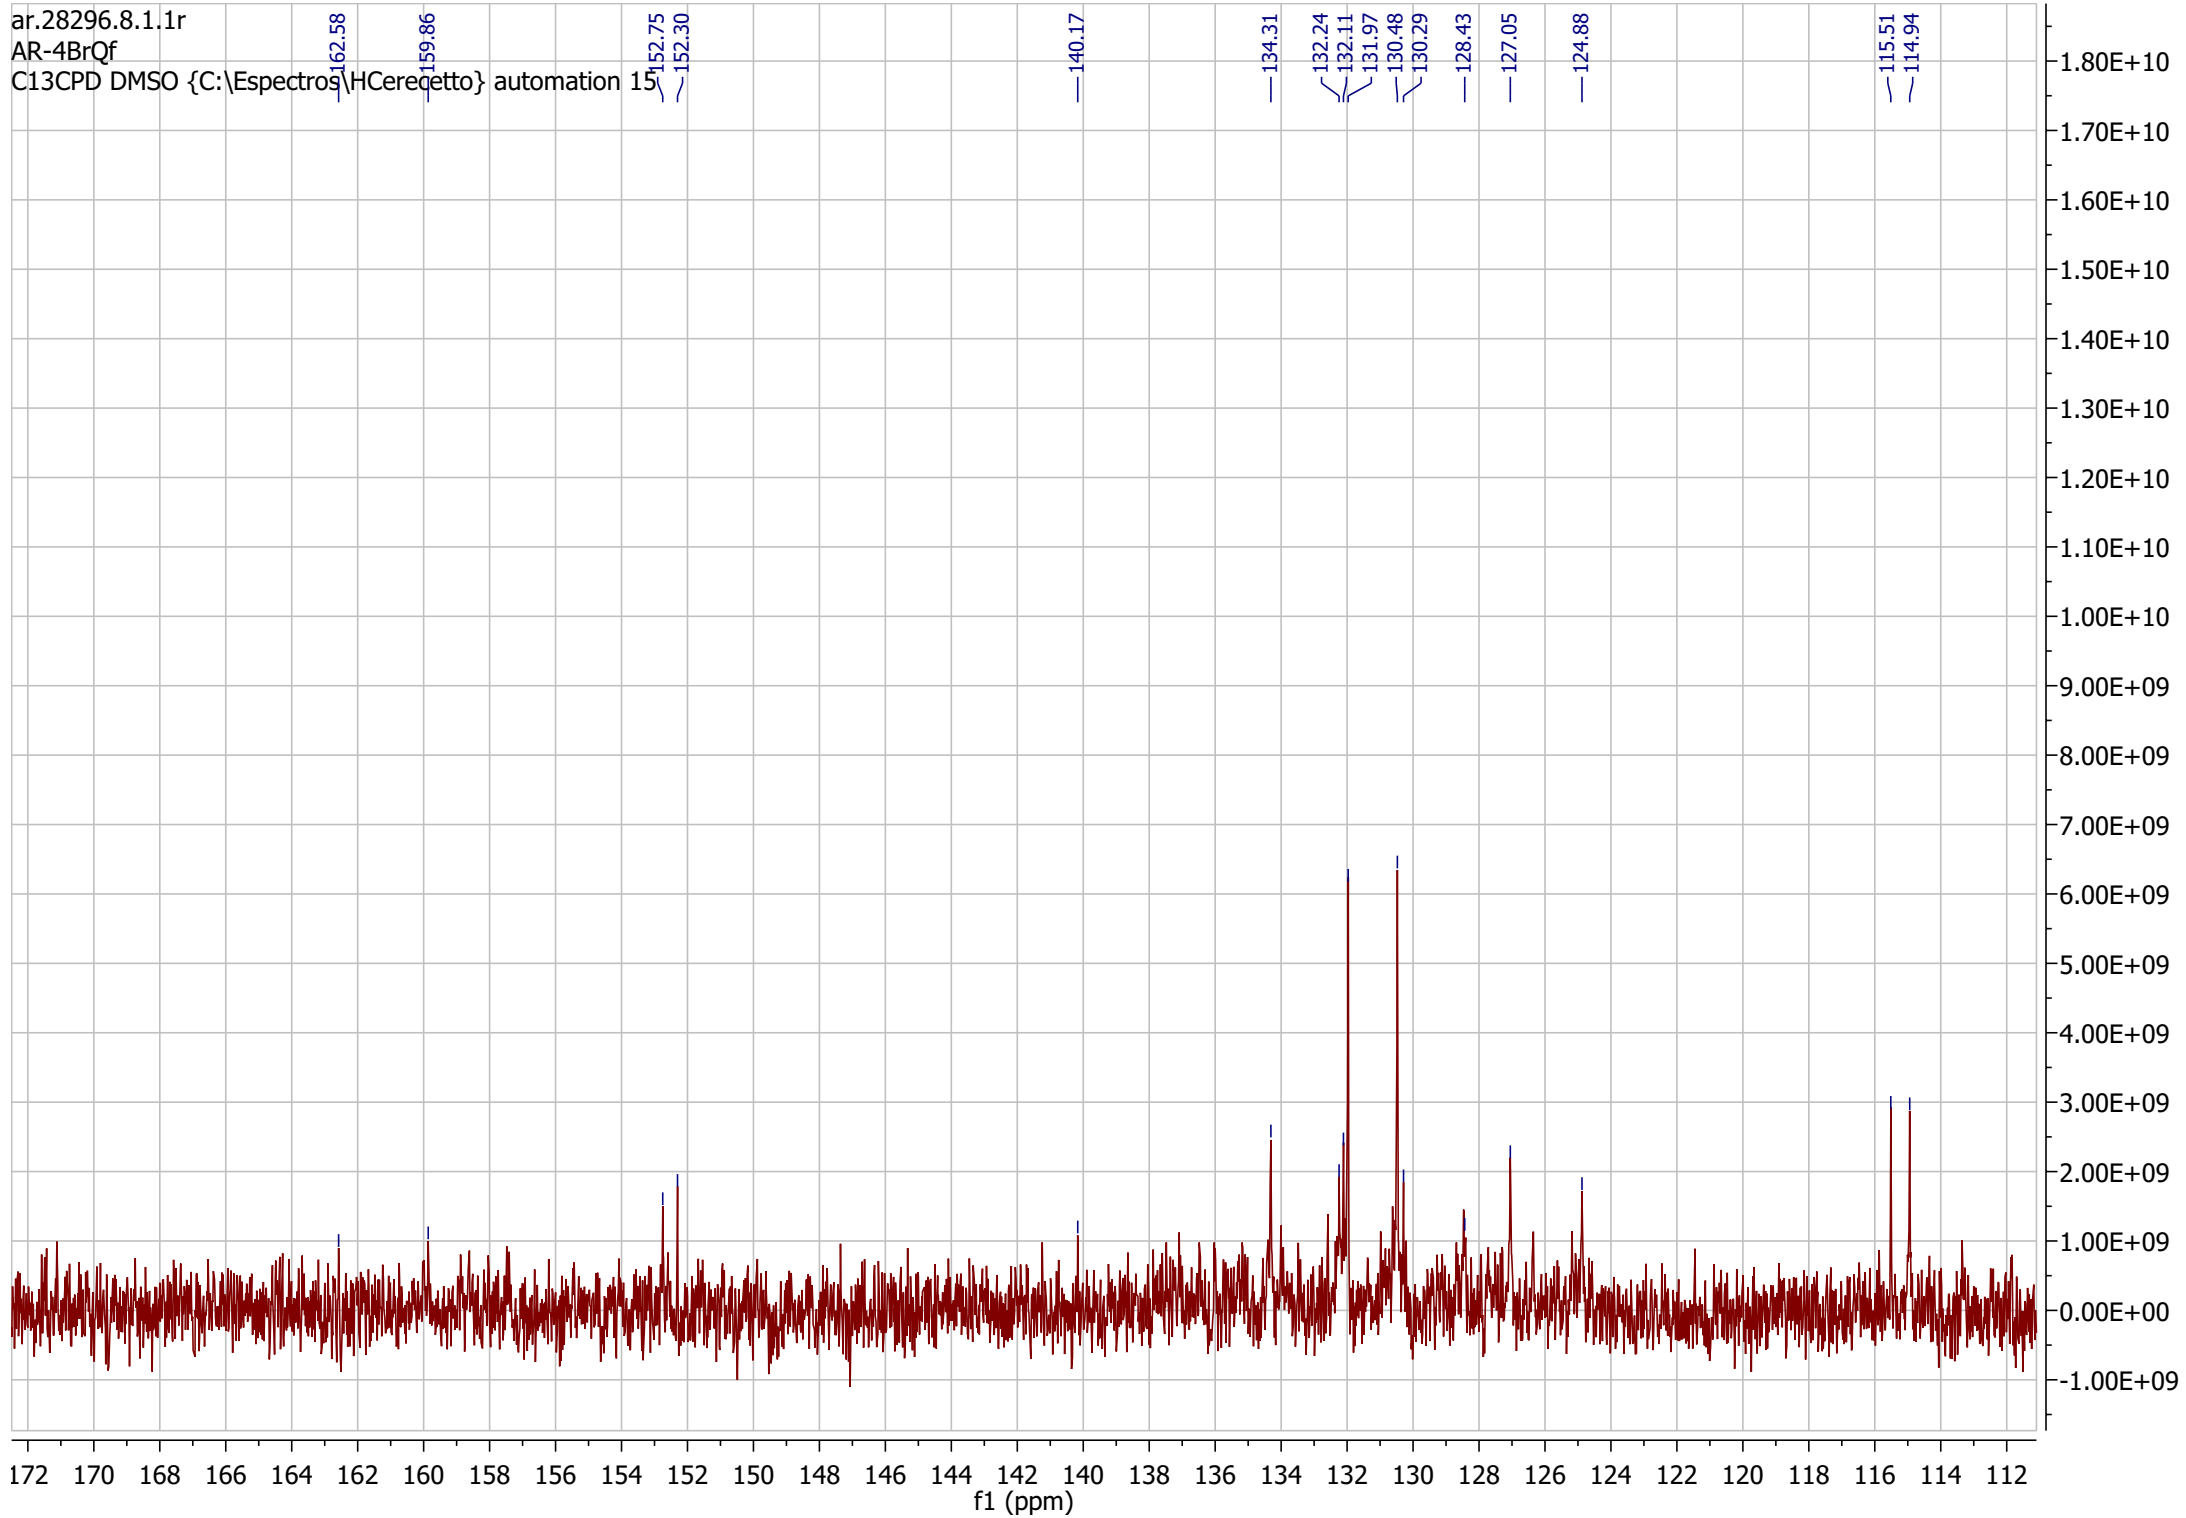

ar.28296.5.1.2rr  
AR-4BrQf  
COSY DMSO {C:\Espectros\HCerecetto} automation 15

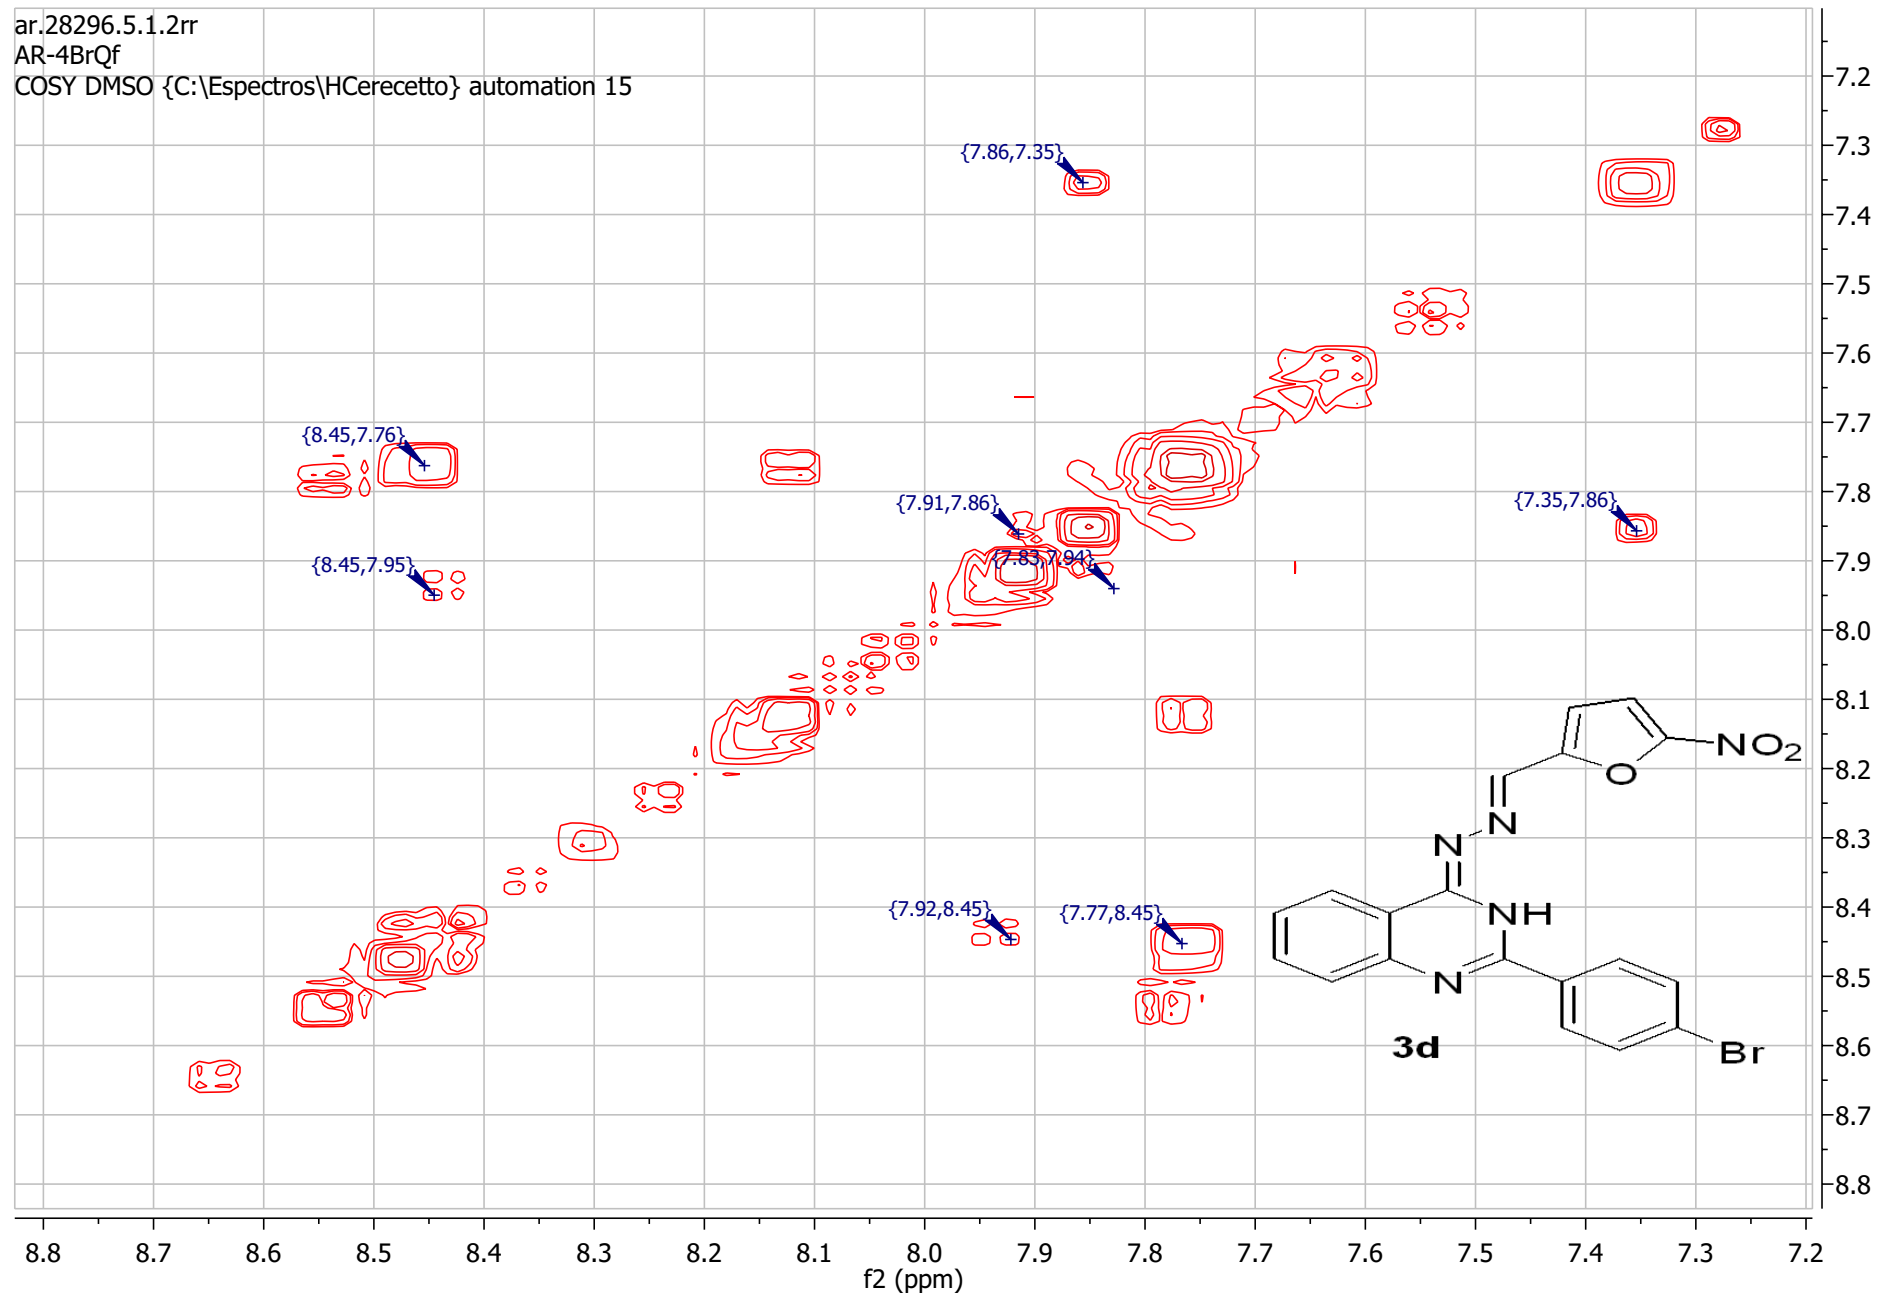

f1 (ppm)

f2 (ppm)

ar.28296.2.1.2rr  
Angel AR-Q4Brf  
HSQC DMSO {C:\Espectros\HCerecetto} automation 4

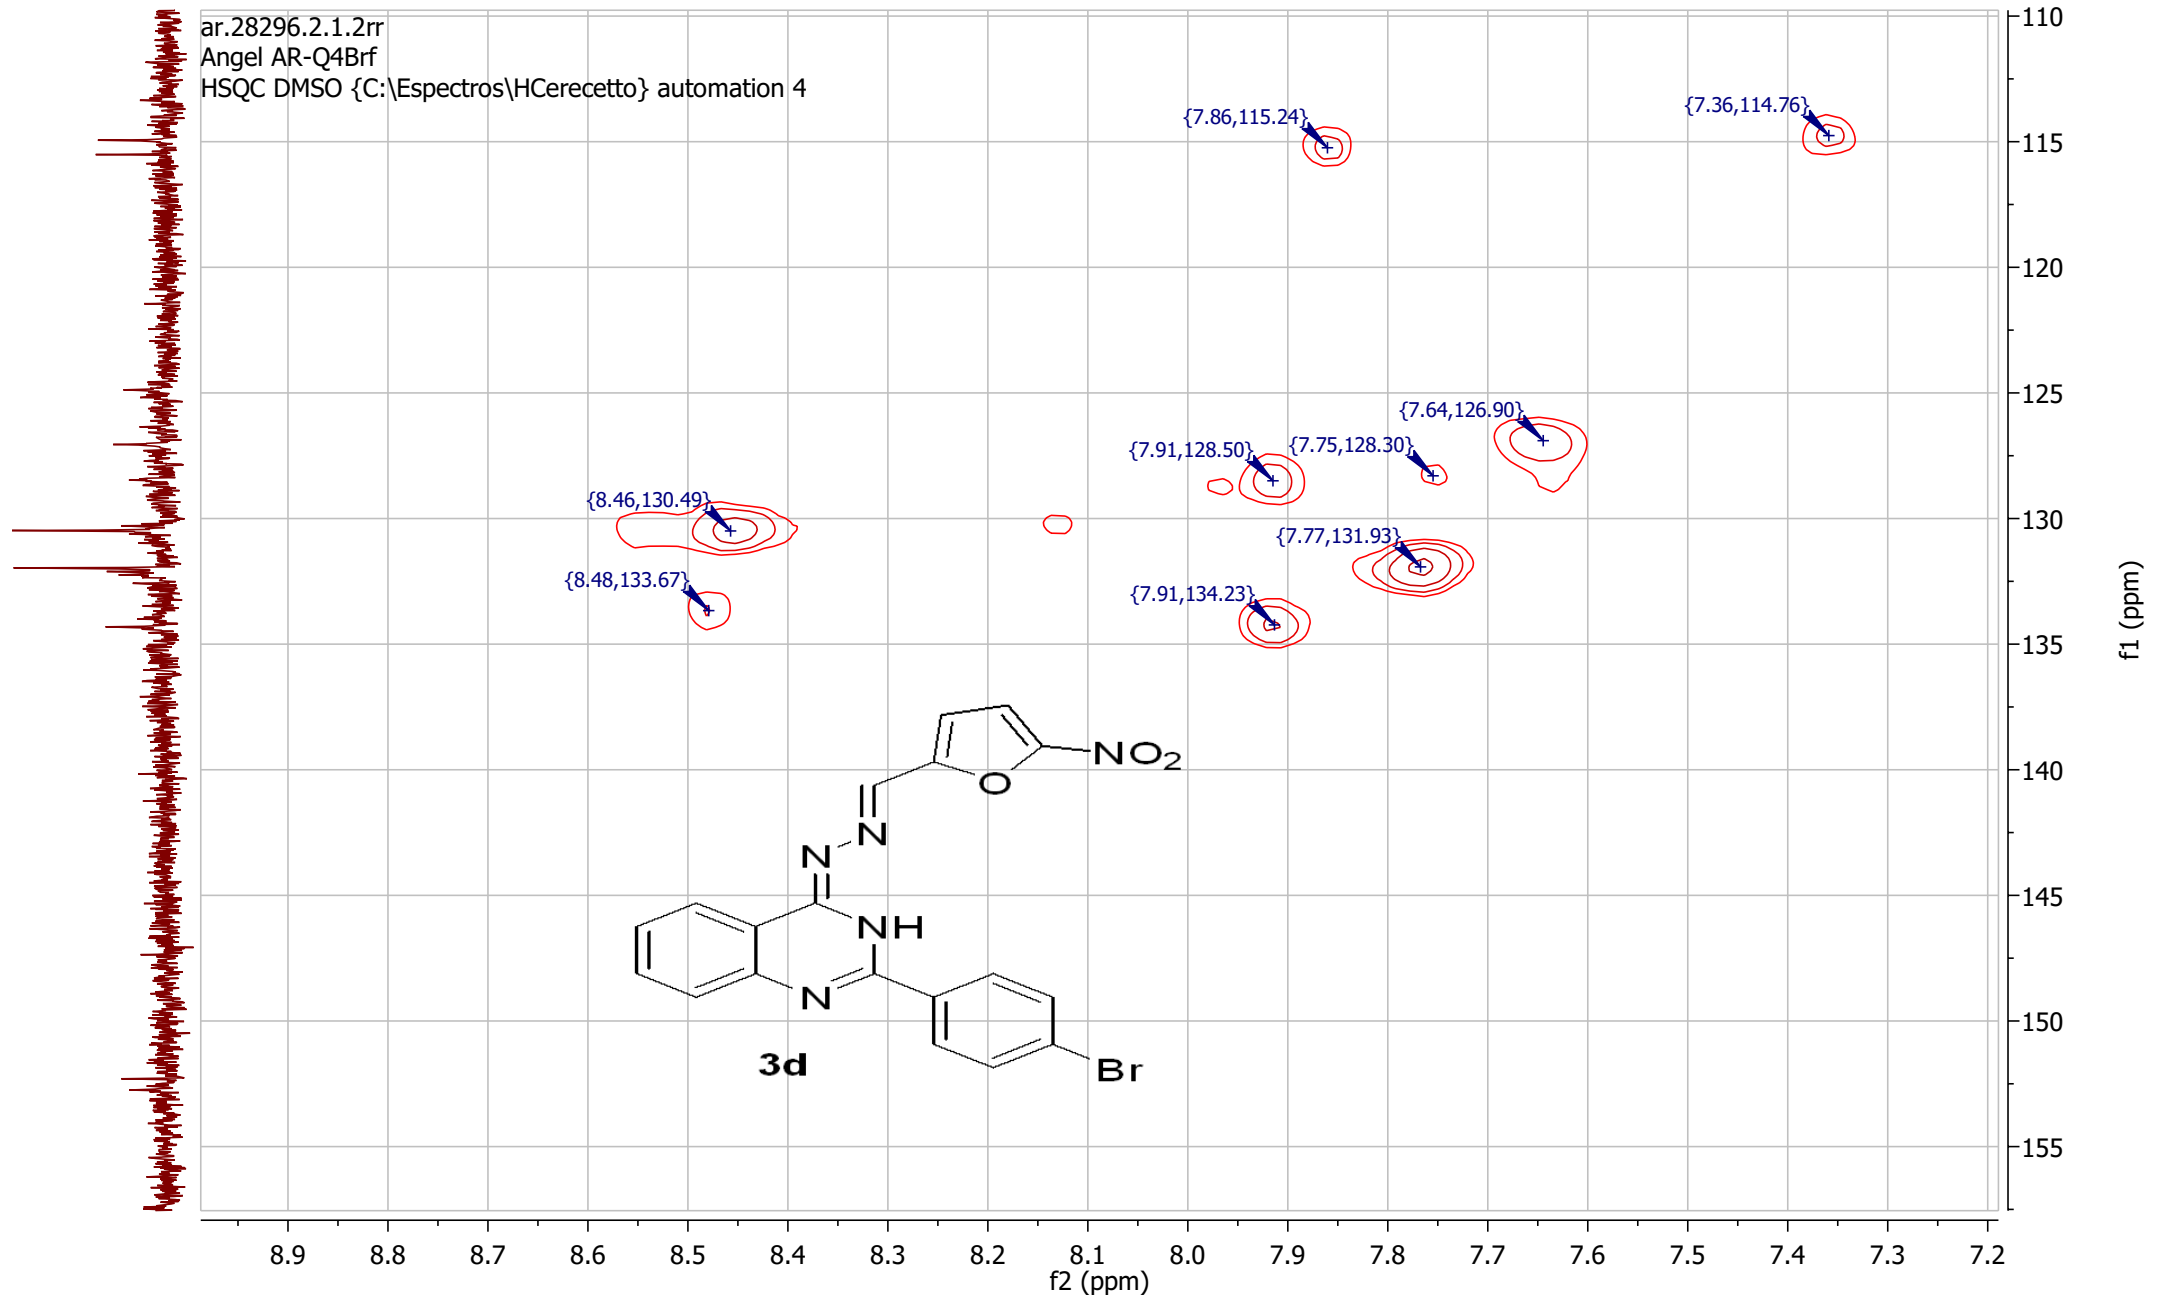

.28064.1.1.1r  
rgel AR-Q4Me  
ROTON8 DMSO {C:\Spectros\HCerecetto} automation 4

8.79  
8.49  
8.41  
8.15  
8.13  
8.11  
8.09  
7.86  
7.75  
7.74  
7.55  
7.35  
7.33  
7.26

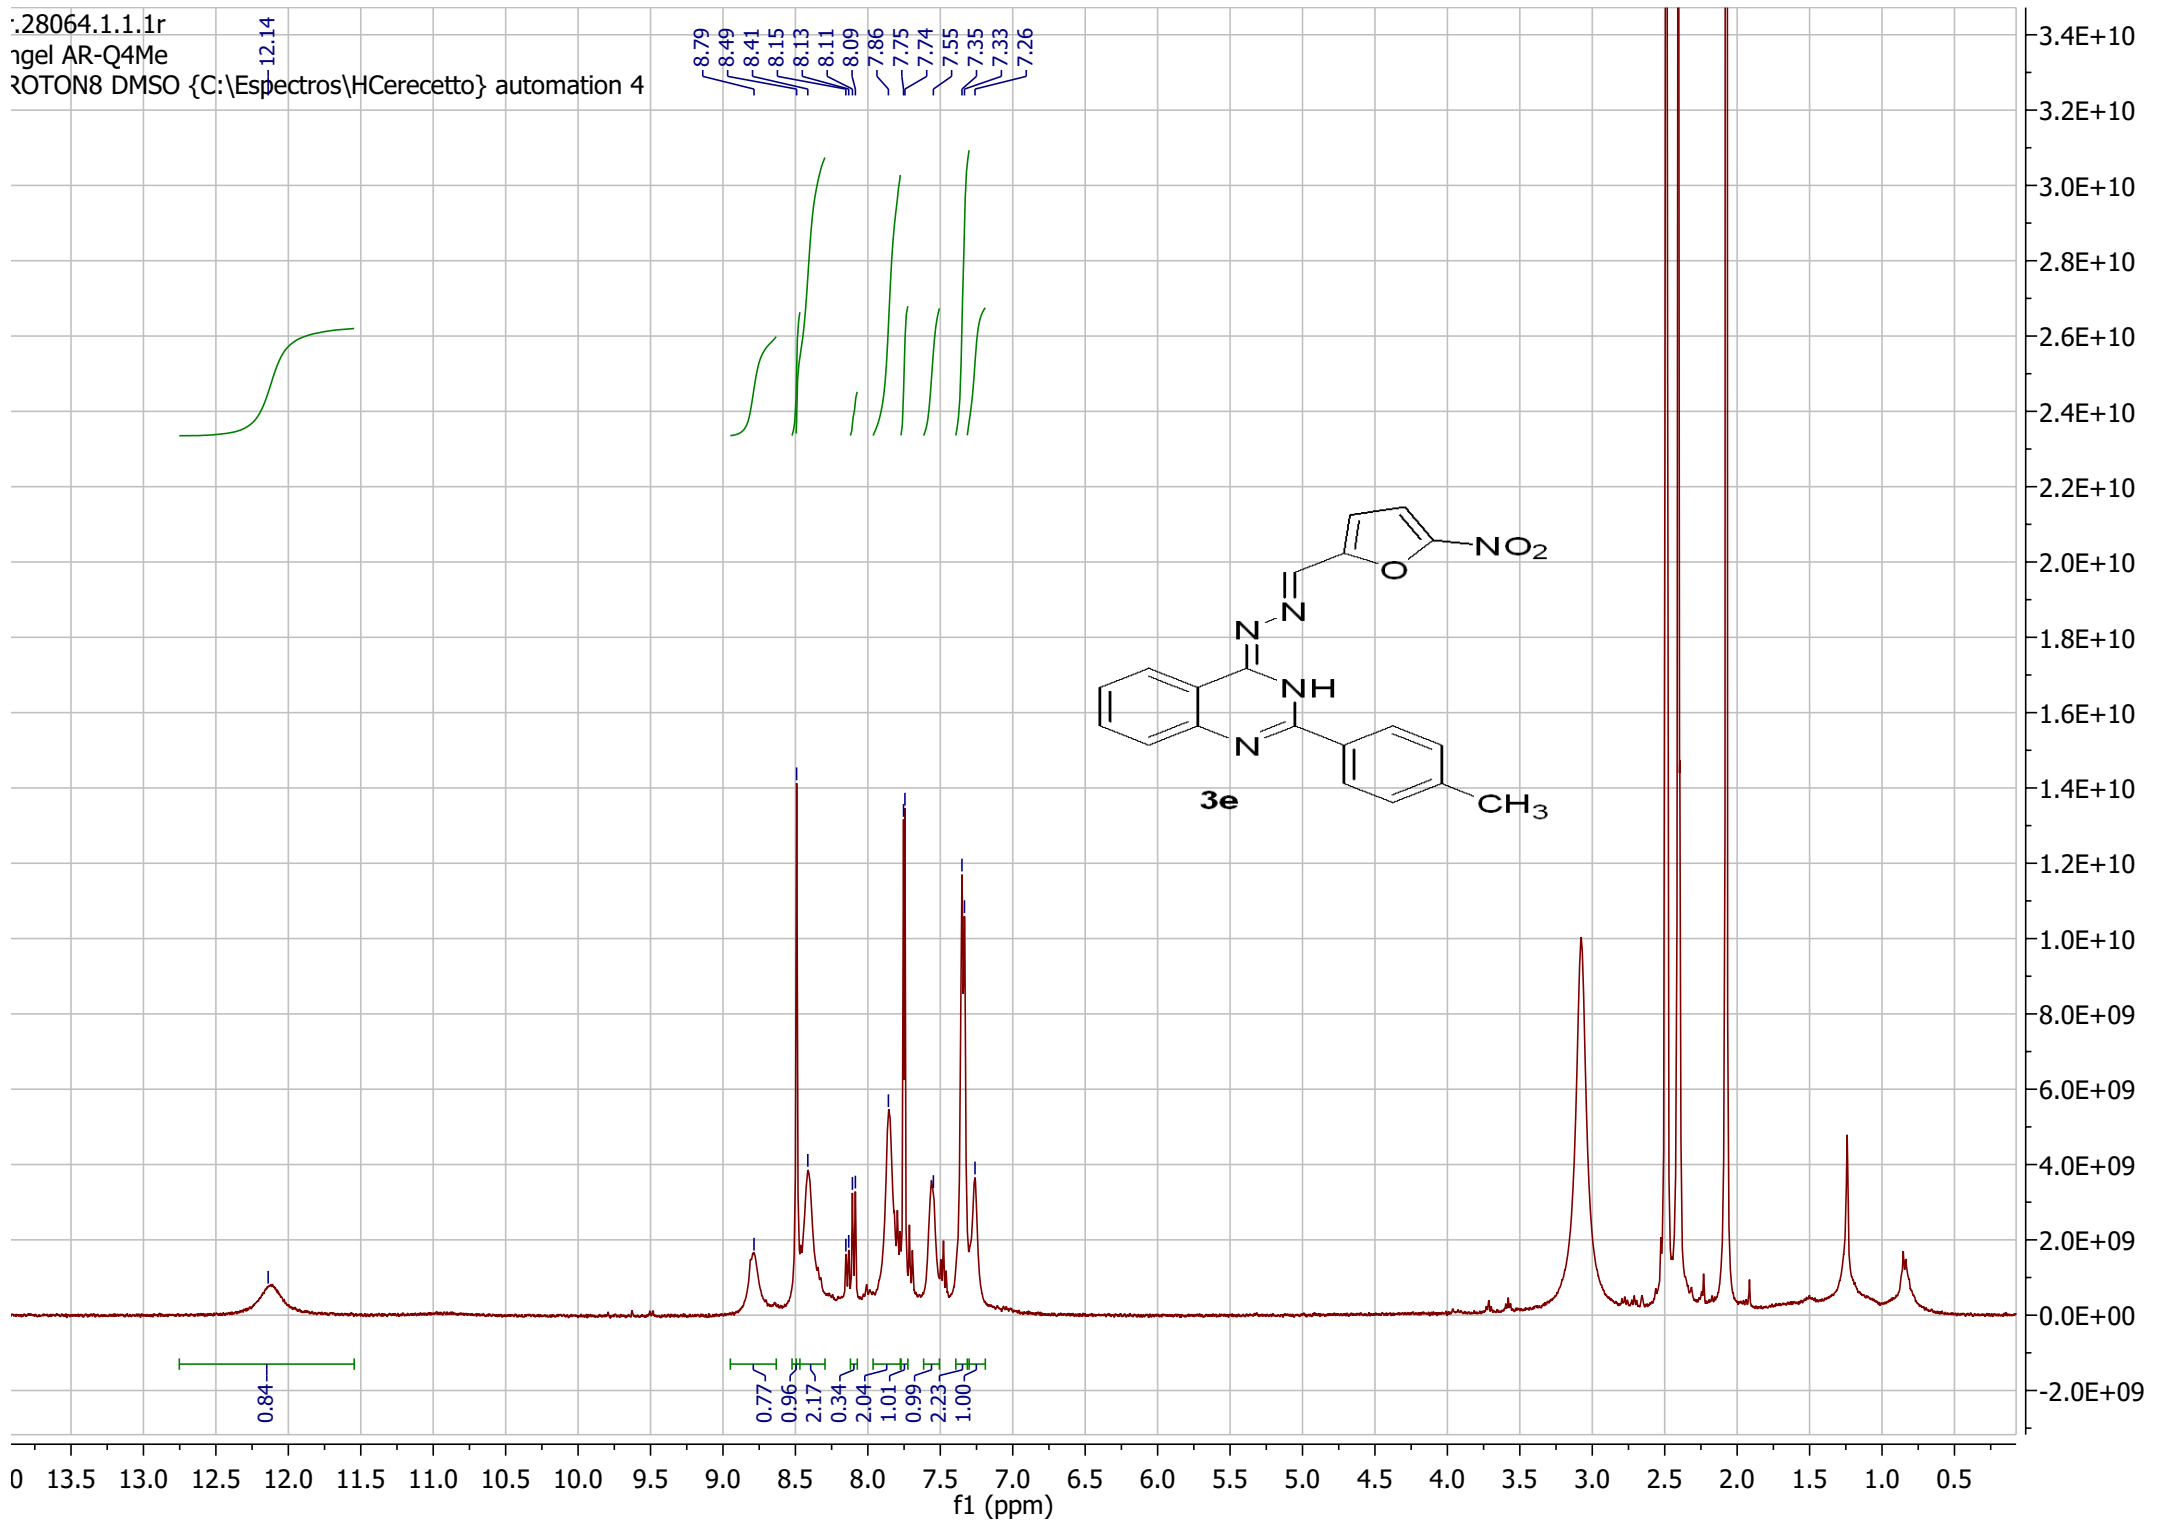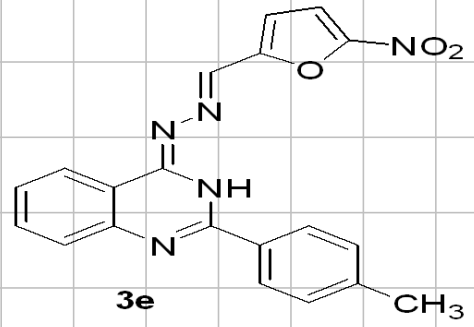

.28064.1.1.1r  
rgel AR-Q4Me  
ROTON8 DMSO {C:\Espectros\HCerecetto} automation 4

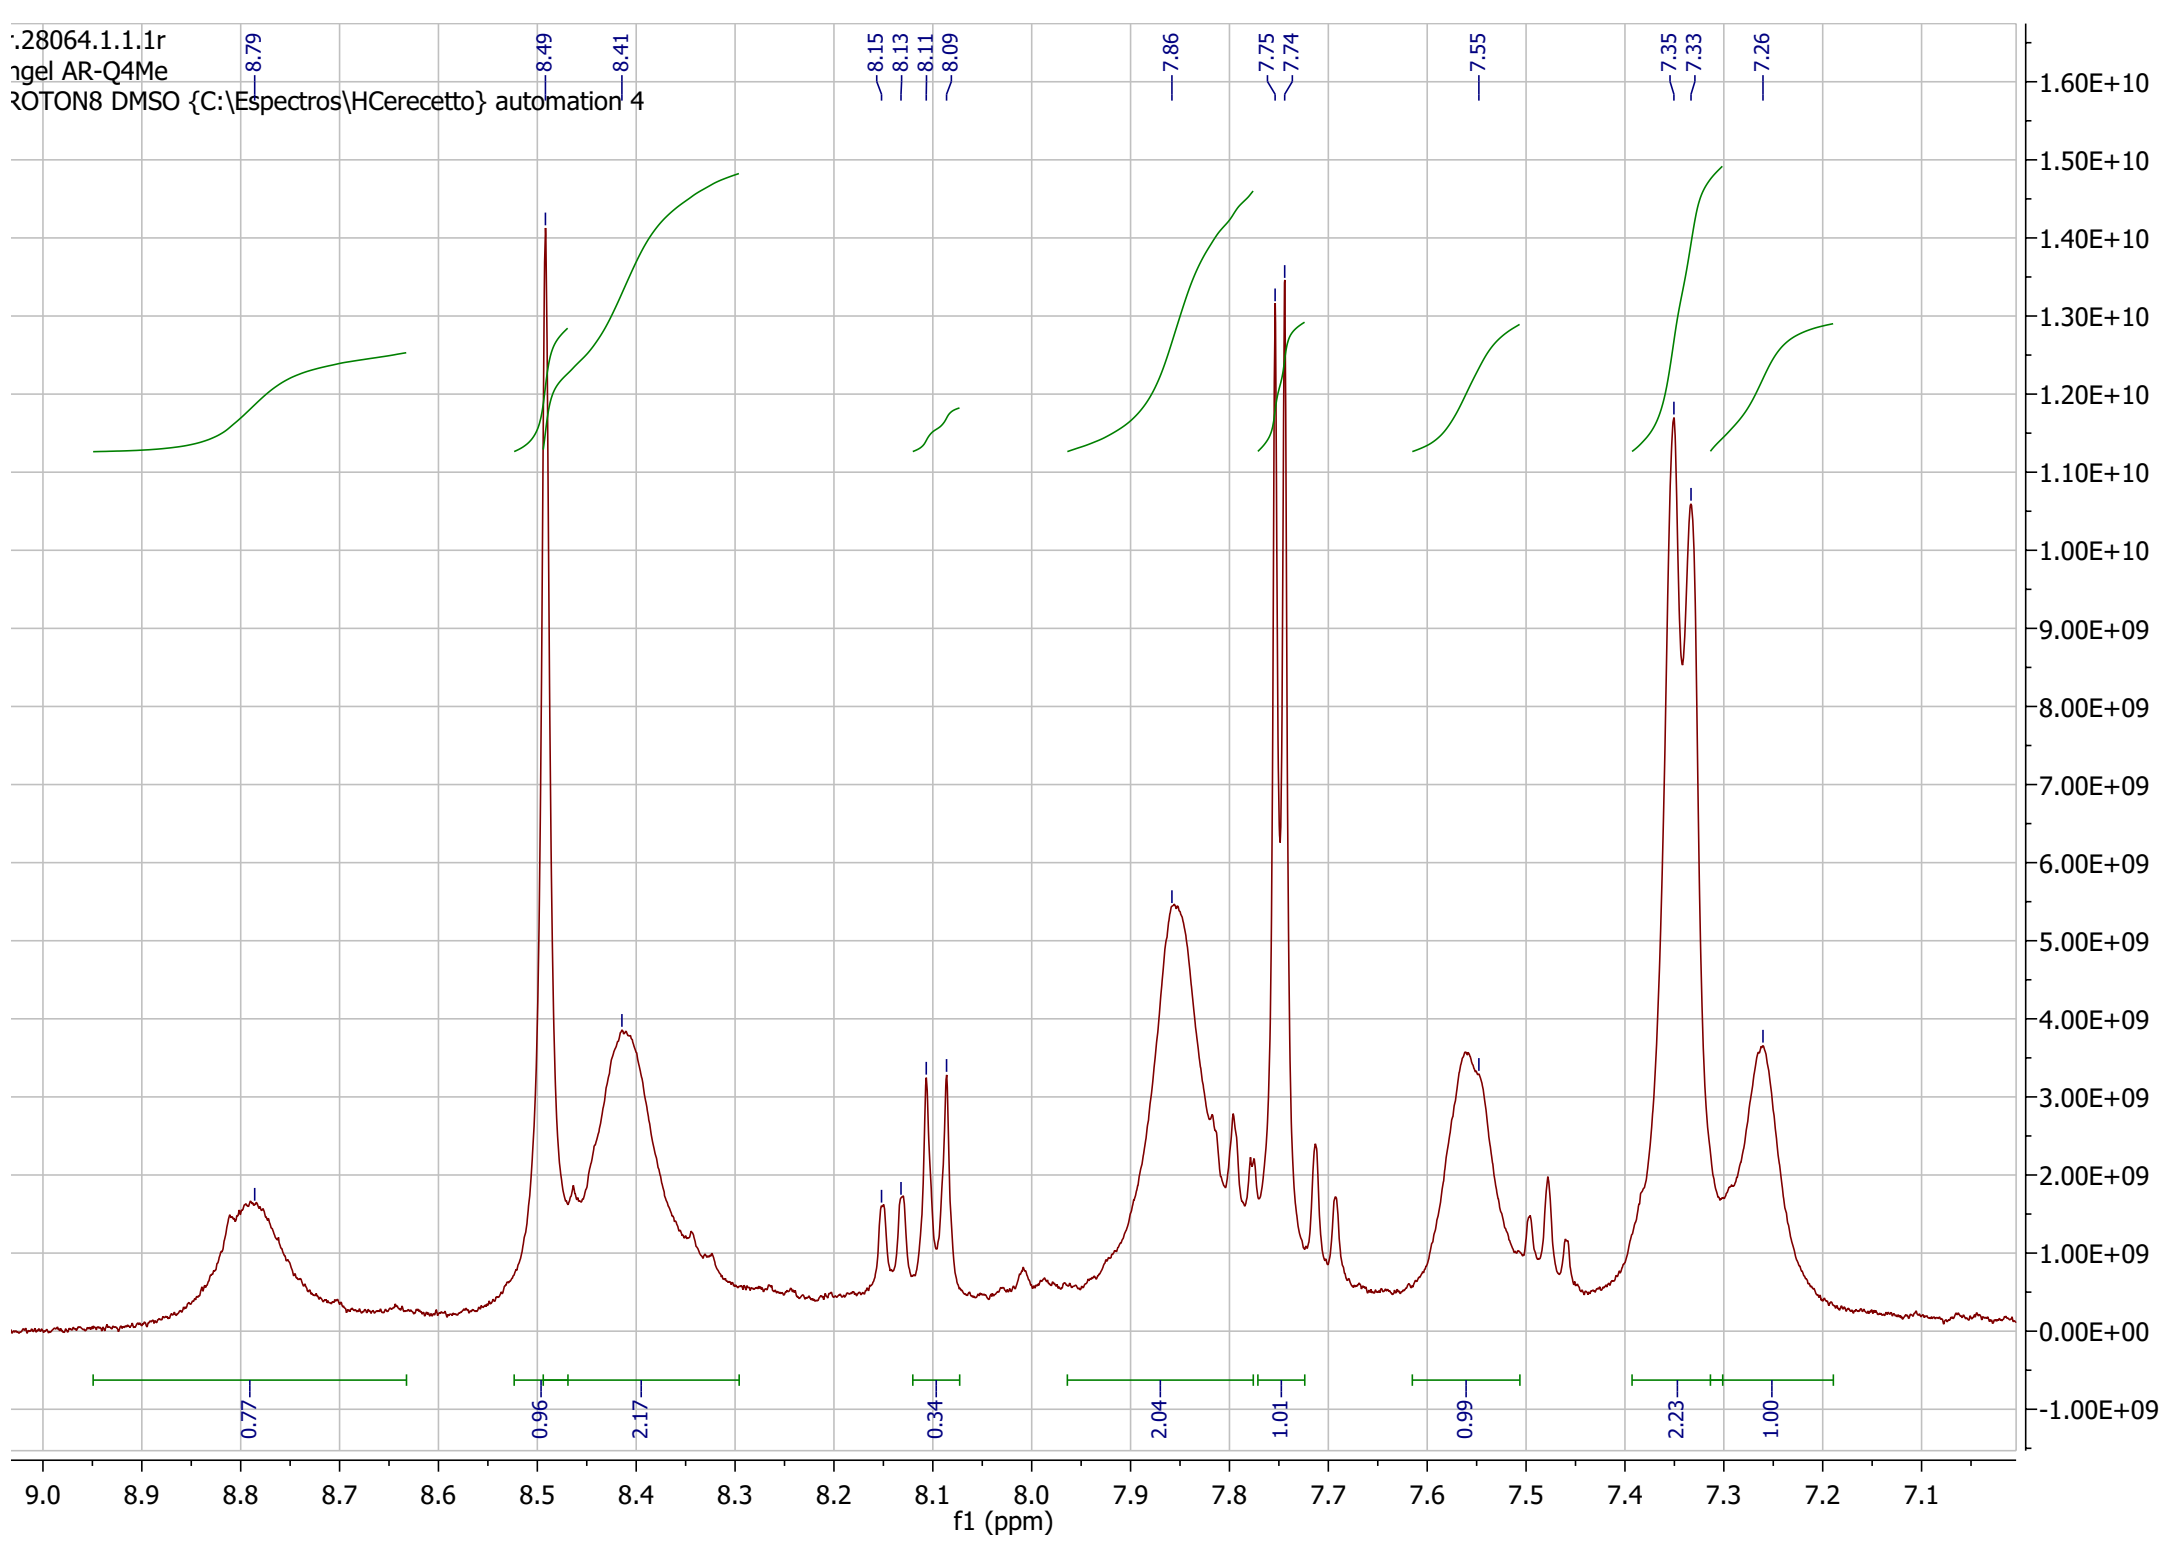

.28064.1.1.f  
gel AR-Q4Me  
ROTON8 DMSO {C:\Espectros\HCerecetto} automation 4

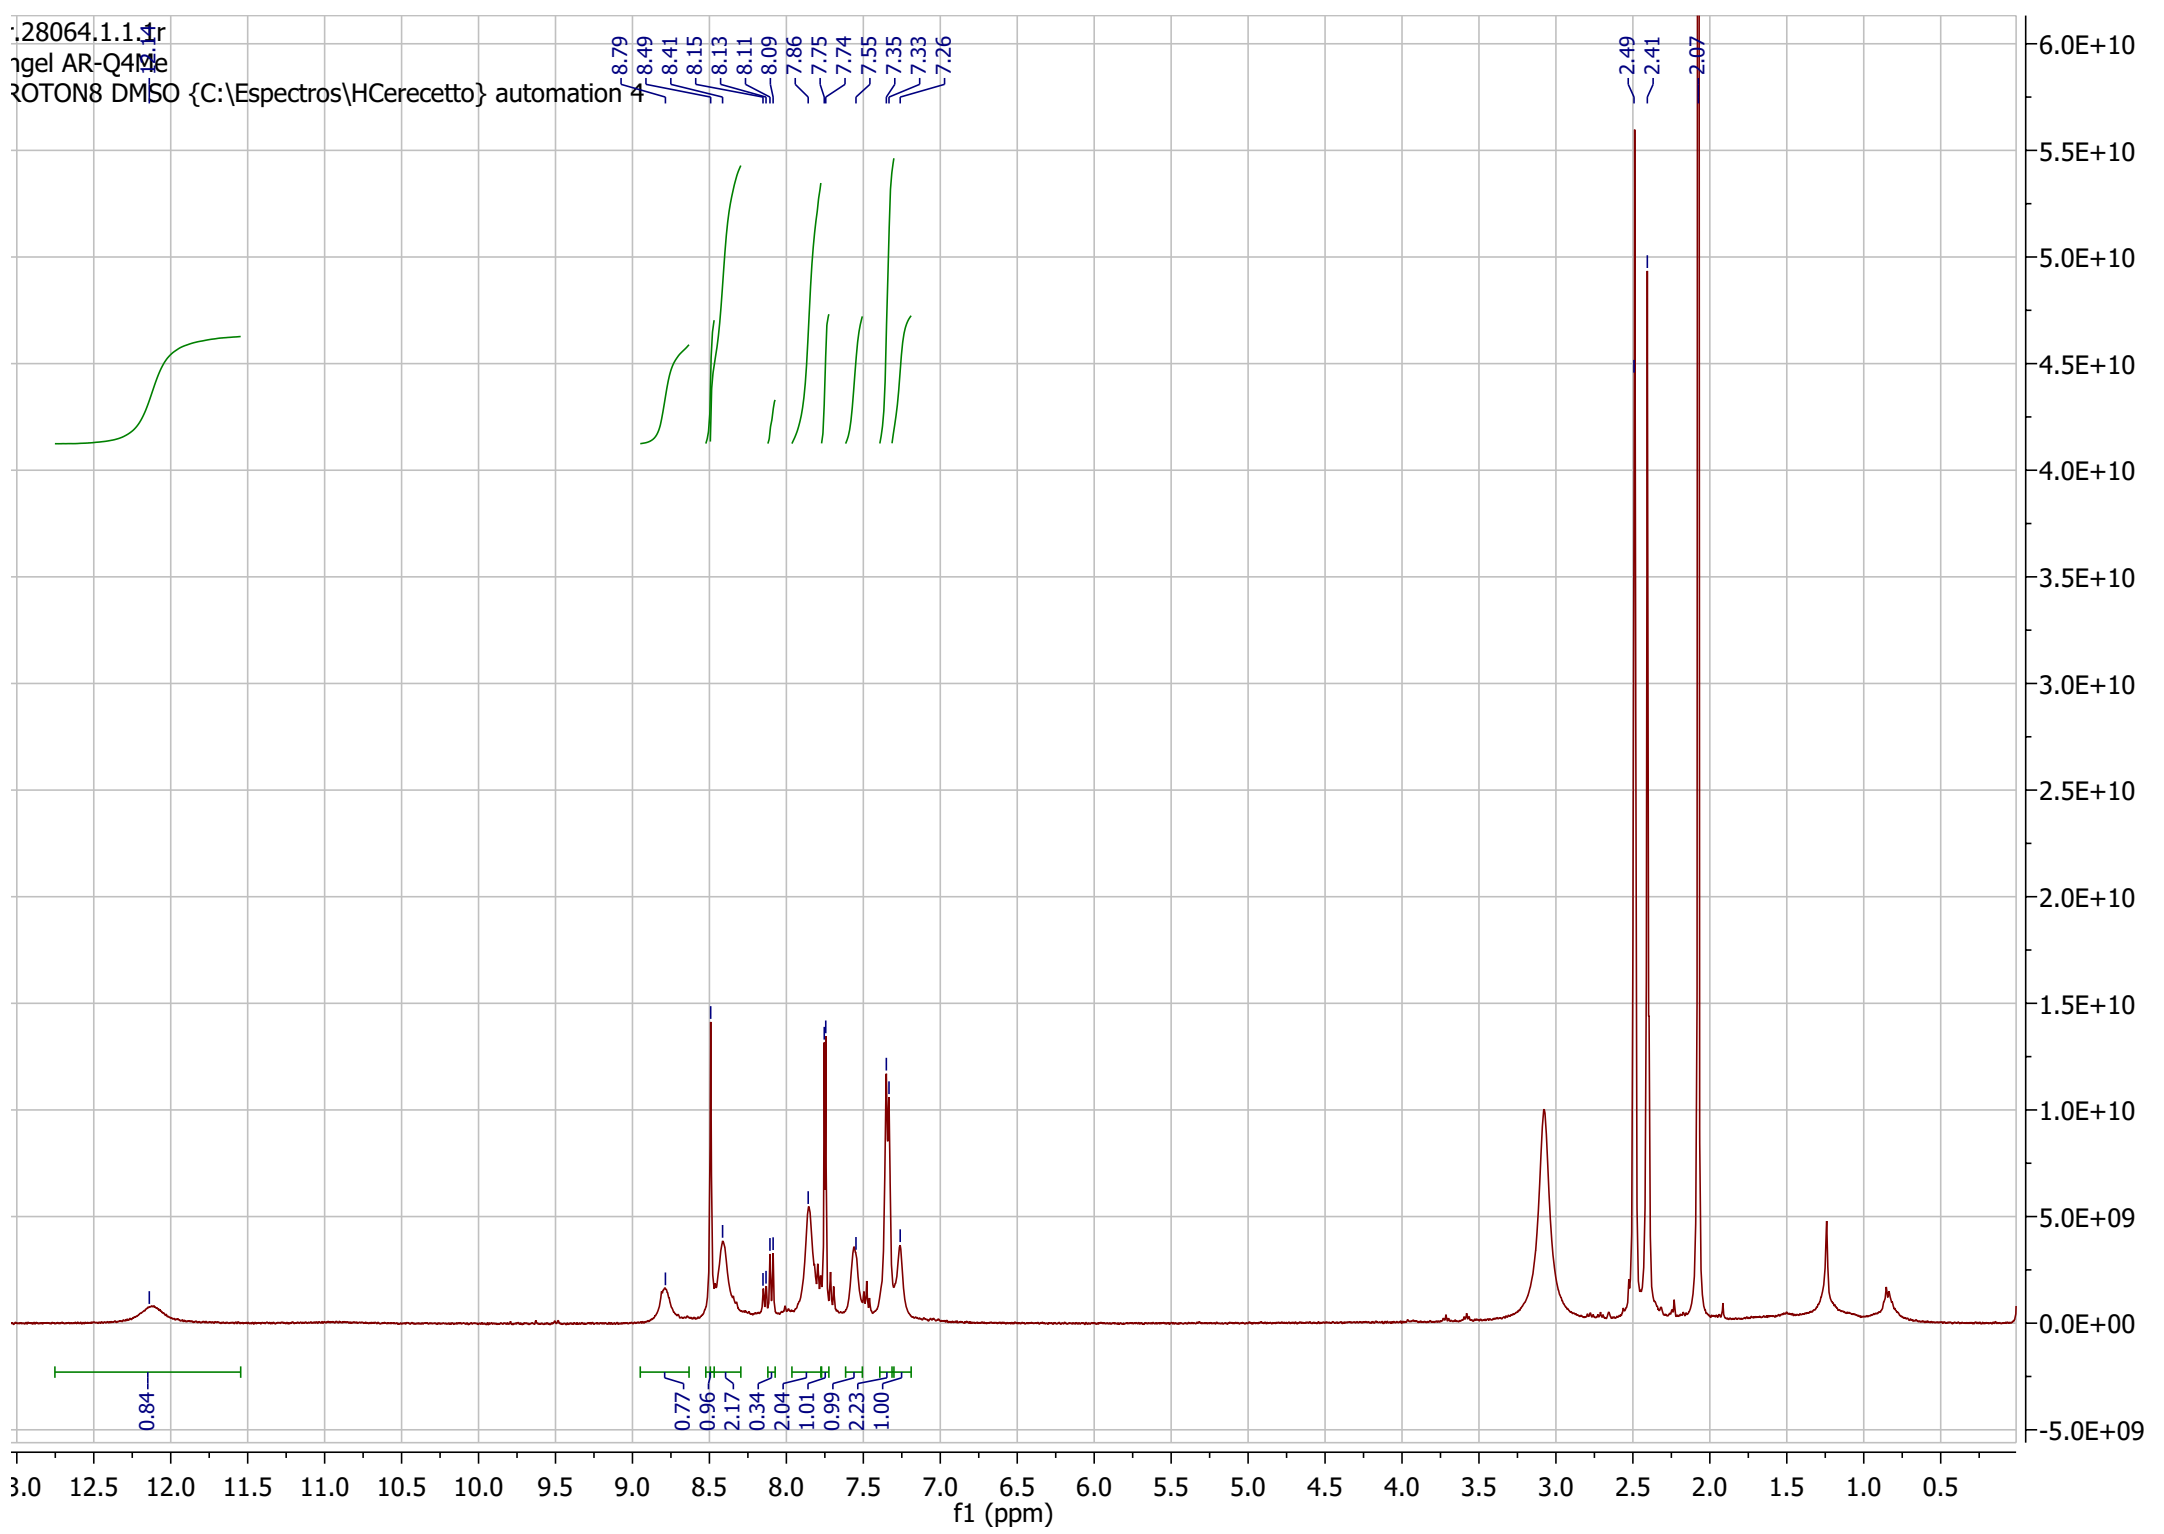



ar.28064.3.1.1r

AngelAR-Q4Me

C13CPD DMSO {C:\Espectros\HCerecetto} automation 5

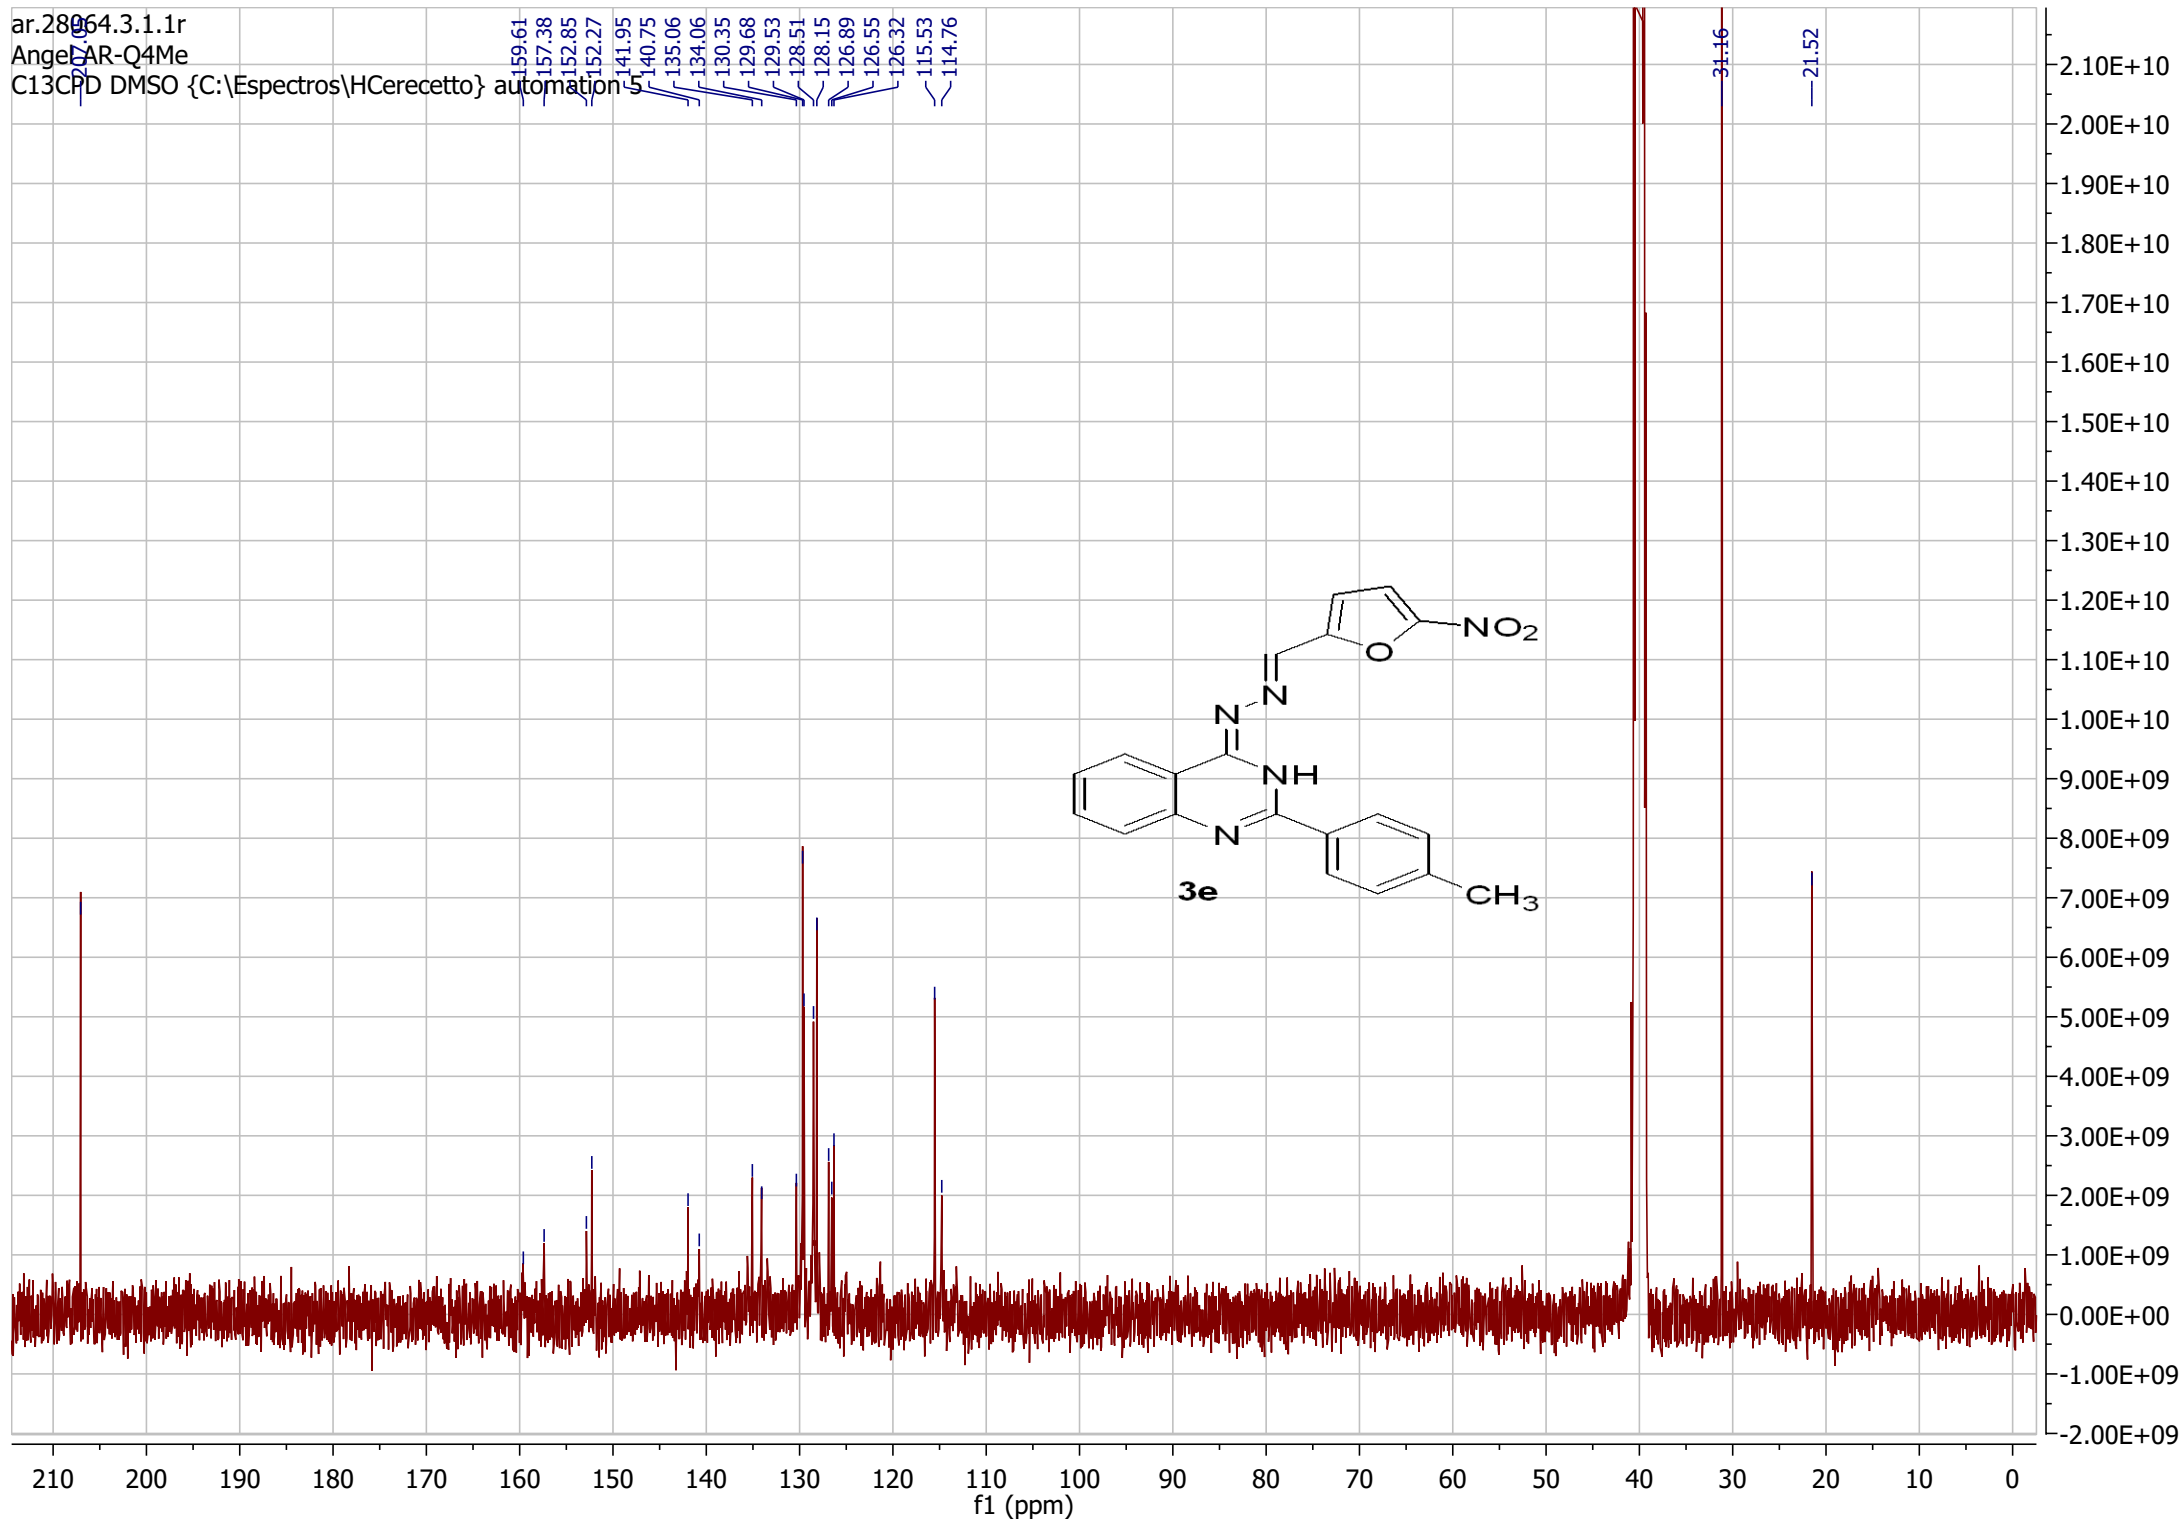

ar.28064.3.1.1r  
Angel AR-Q4Me  
C13CPD DMSO {C:\Espectros\HCerecetto\ automation 5

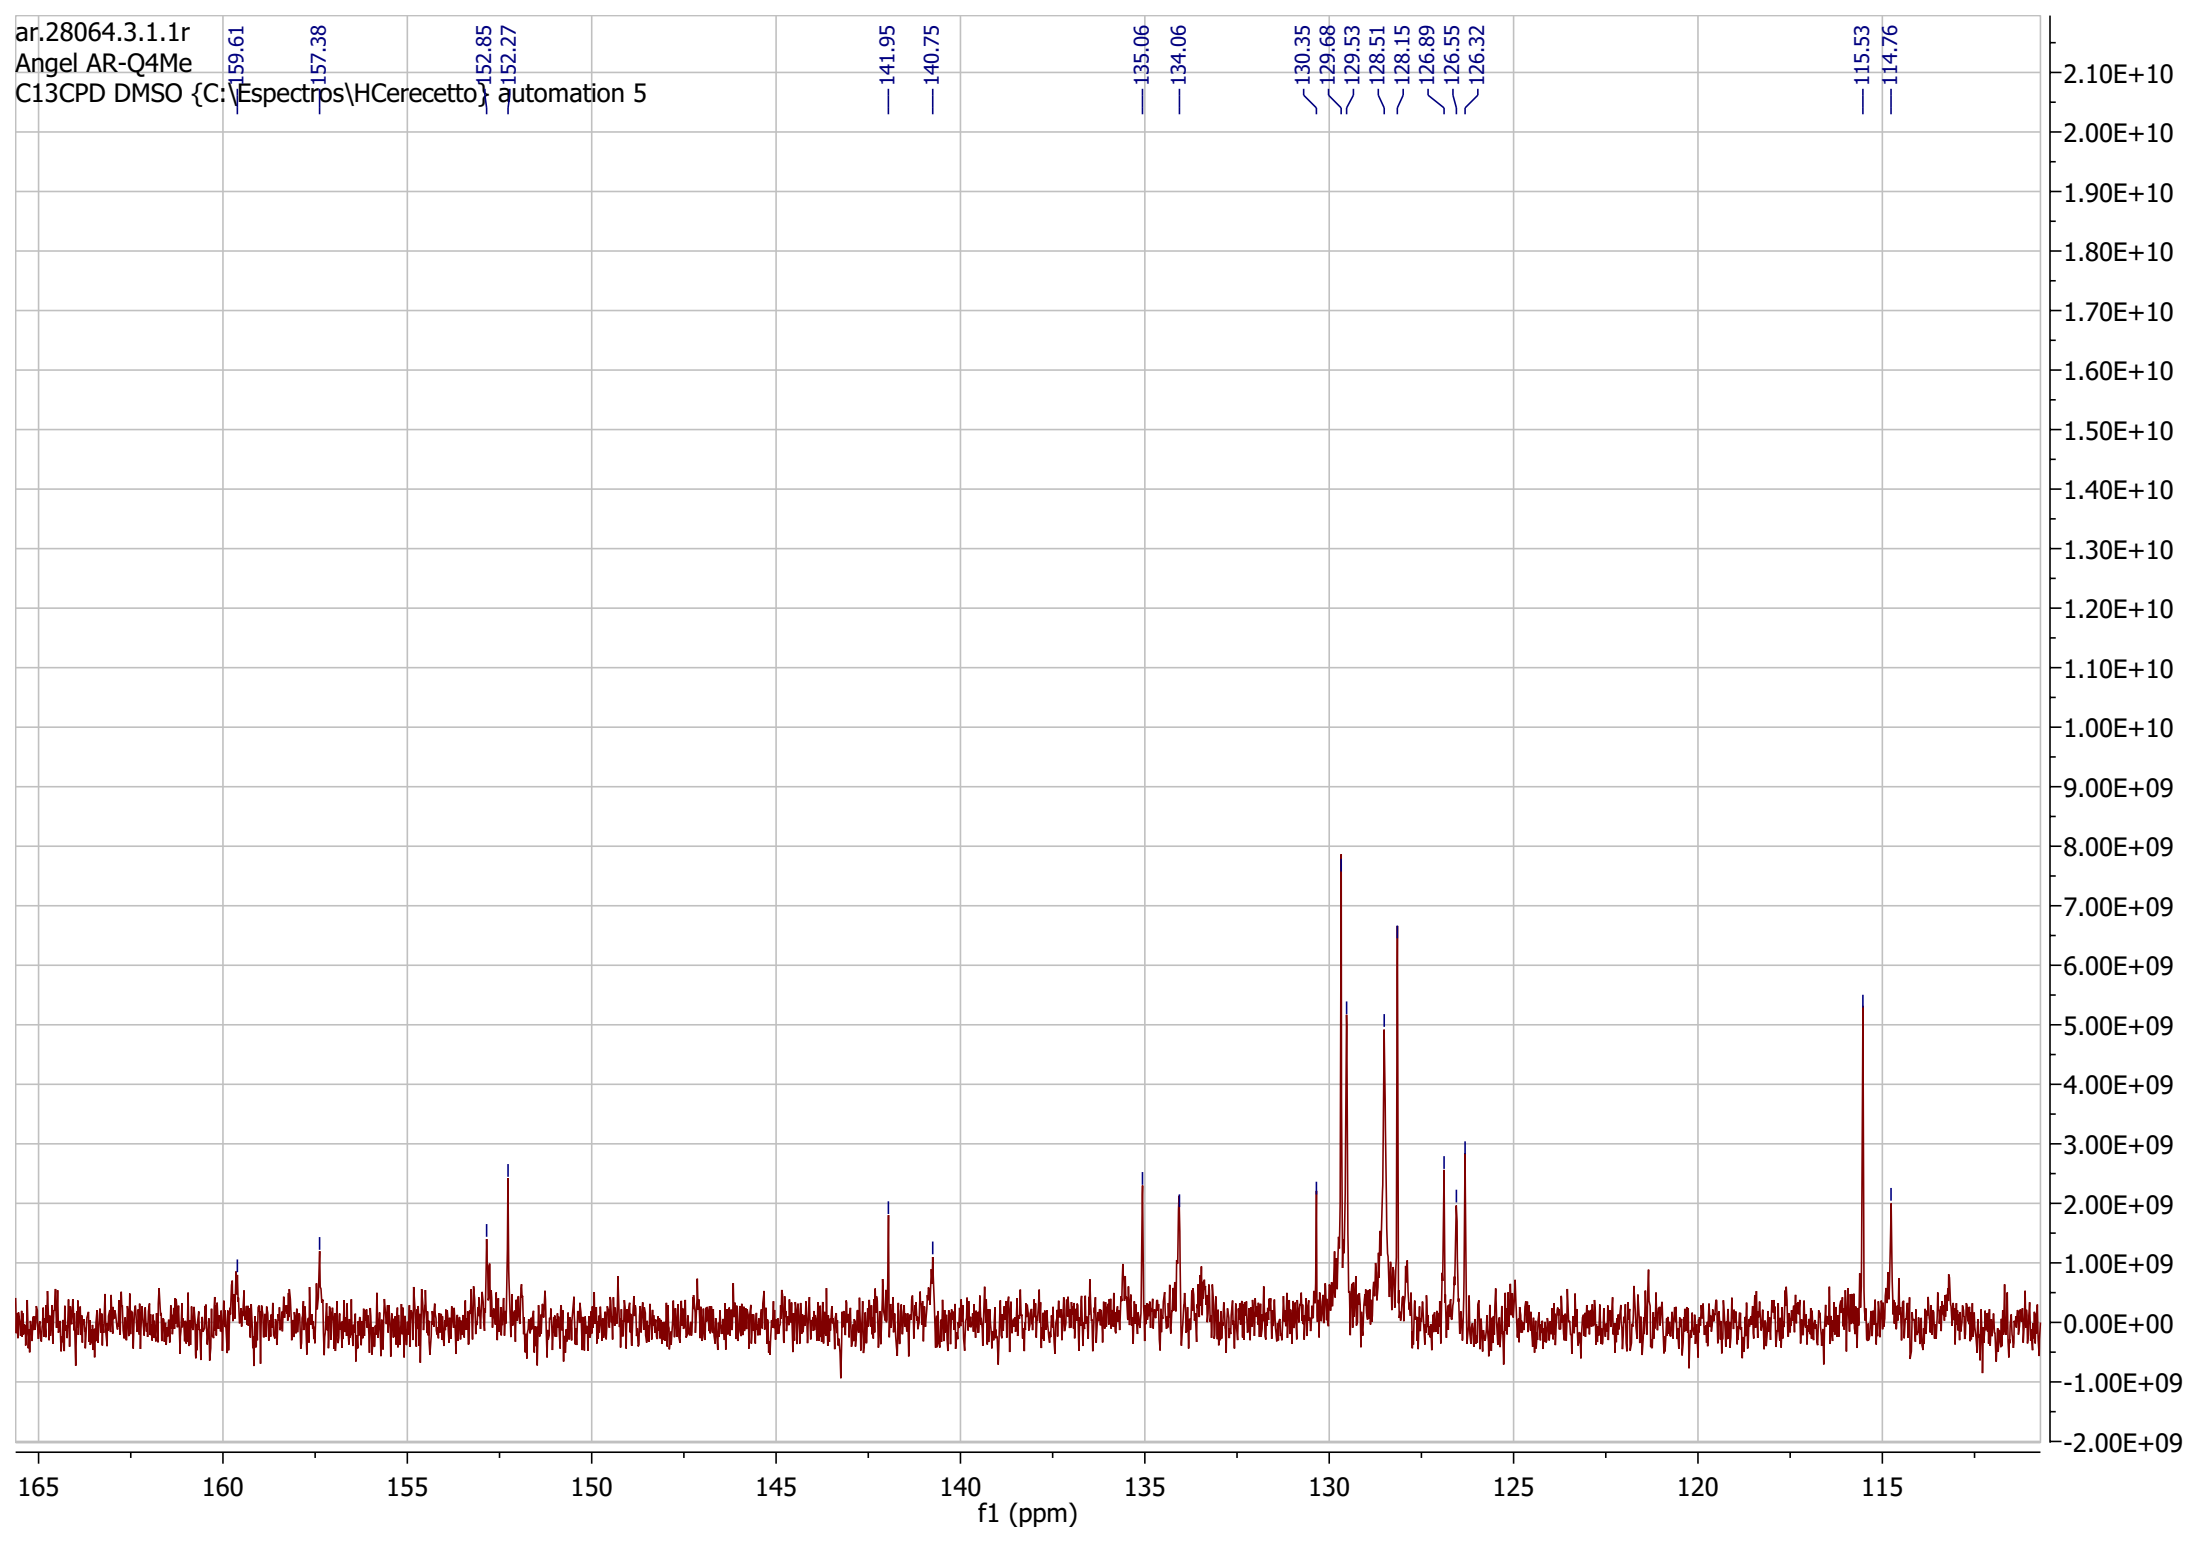

ar.28064.2.1.2rr  
Angel AR-Q4Me  
HSQC DMSO {C:\Especros\HCerecetto} automation 5

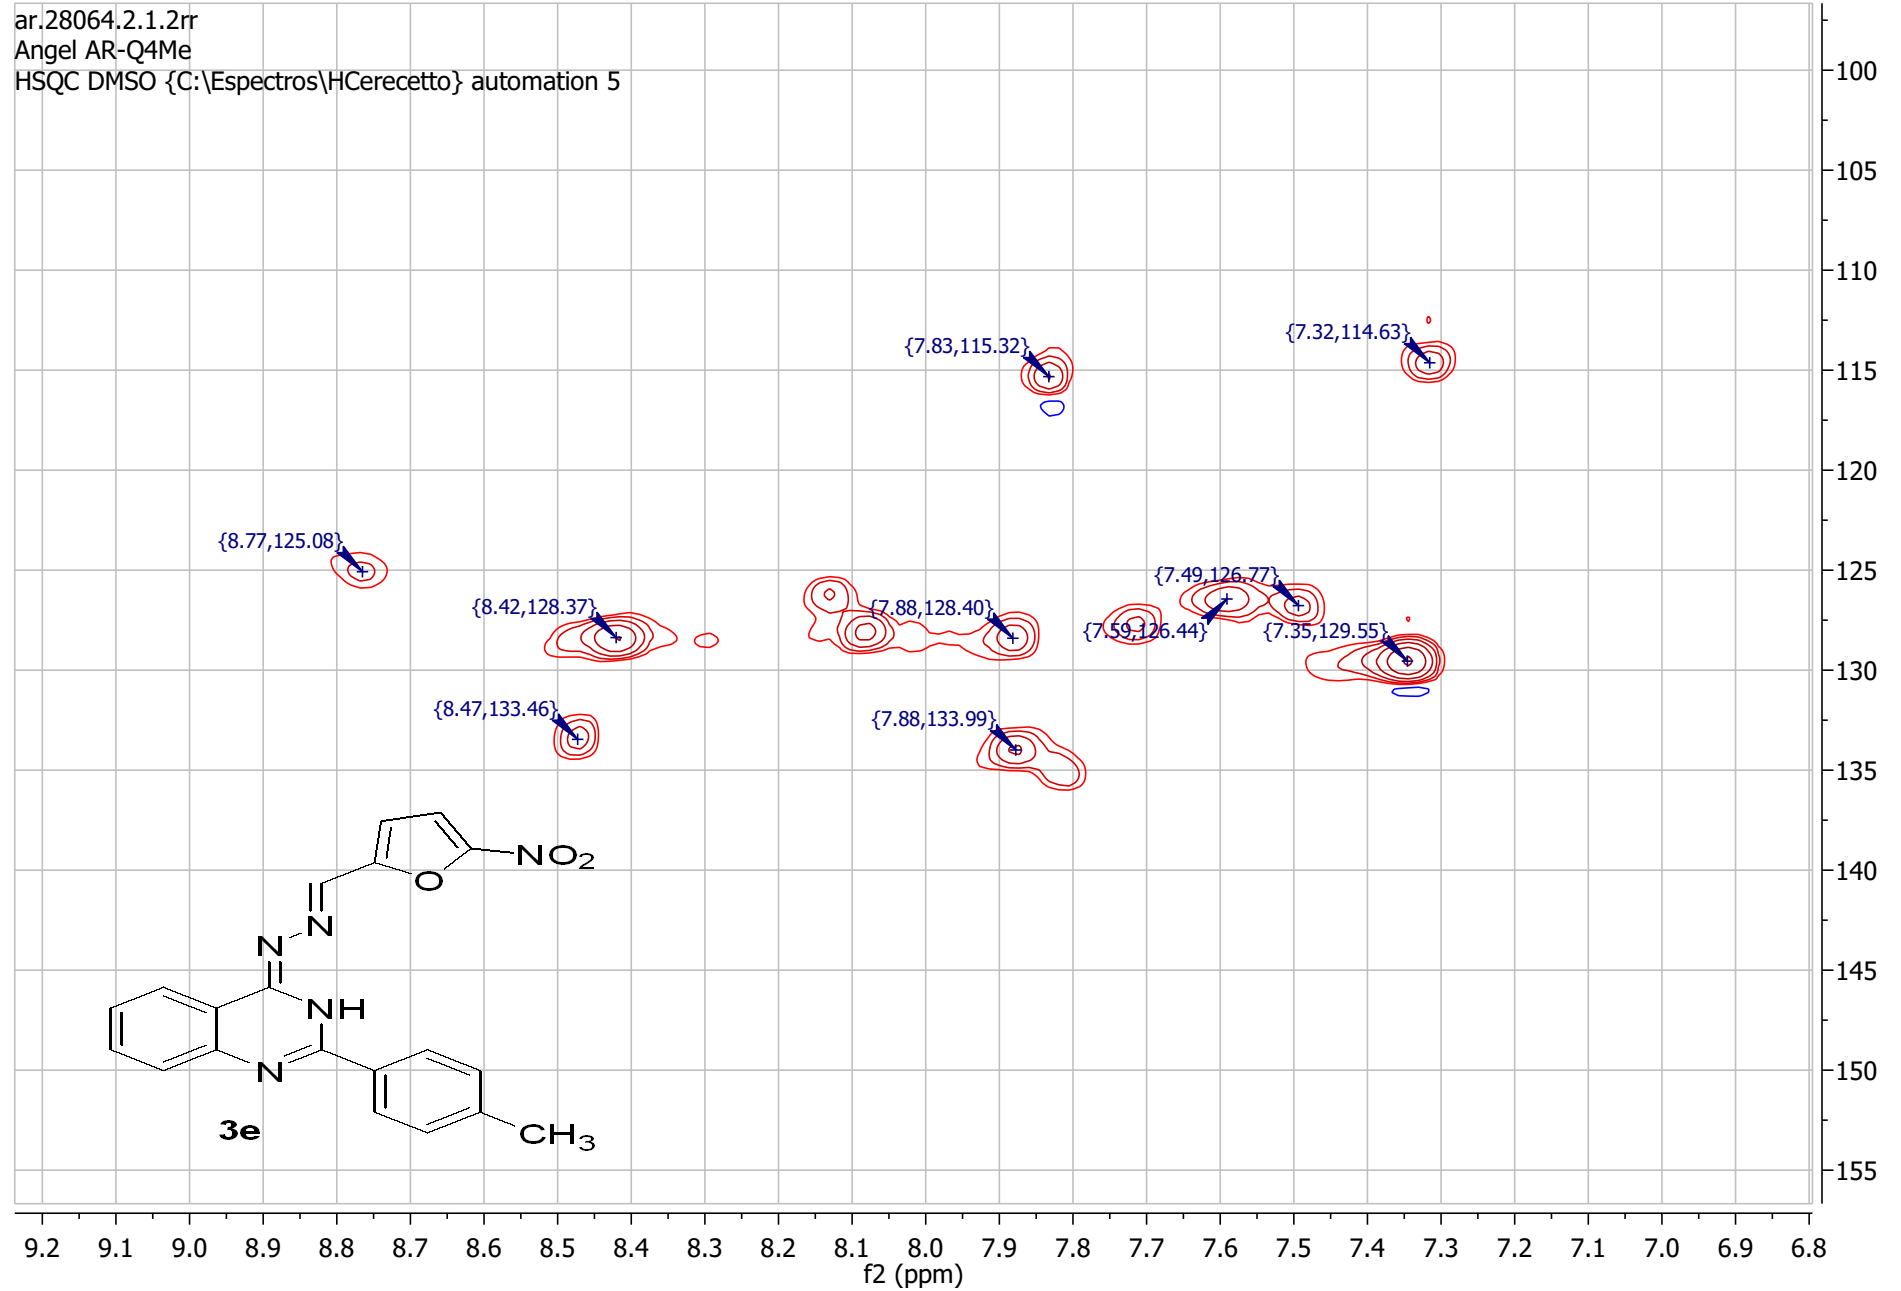

ar.28299  
PROTON8 DMSO {C:\Espectros\HCerecetto} automation 6

12.47

8.81  
8.51  
8.48  
7.93  
7.85  
7.84  
7.64  
7.62  
7.61  
7.59  
7.33  
7.32

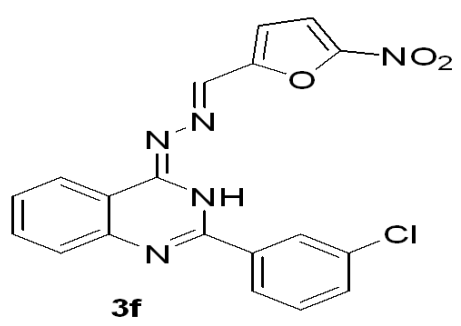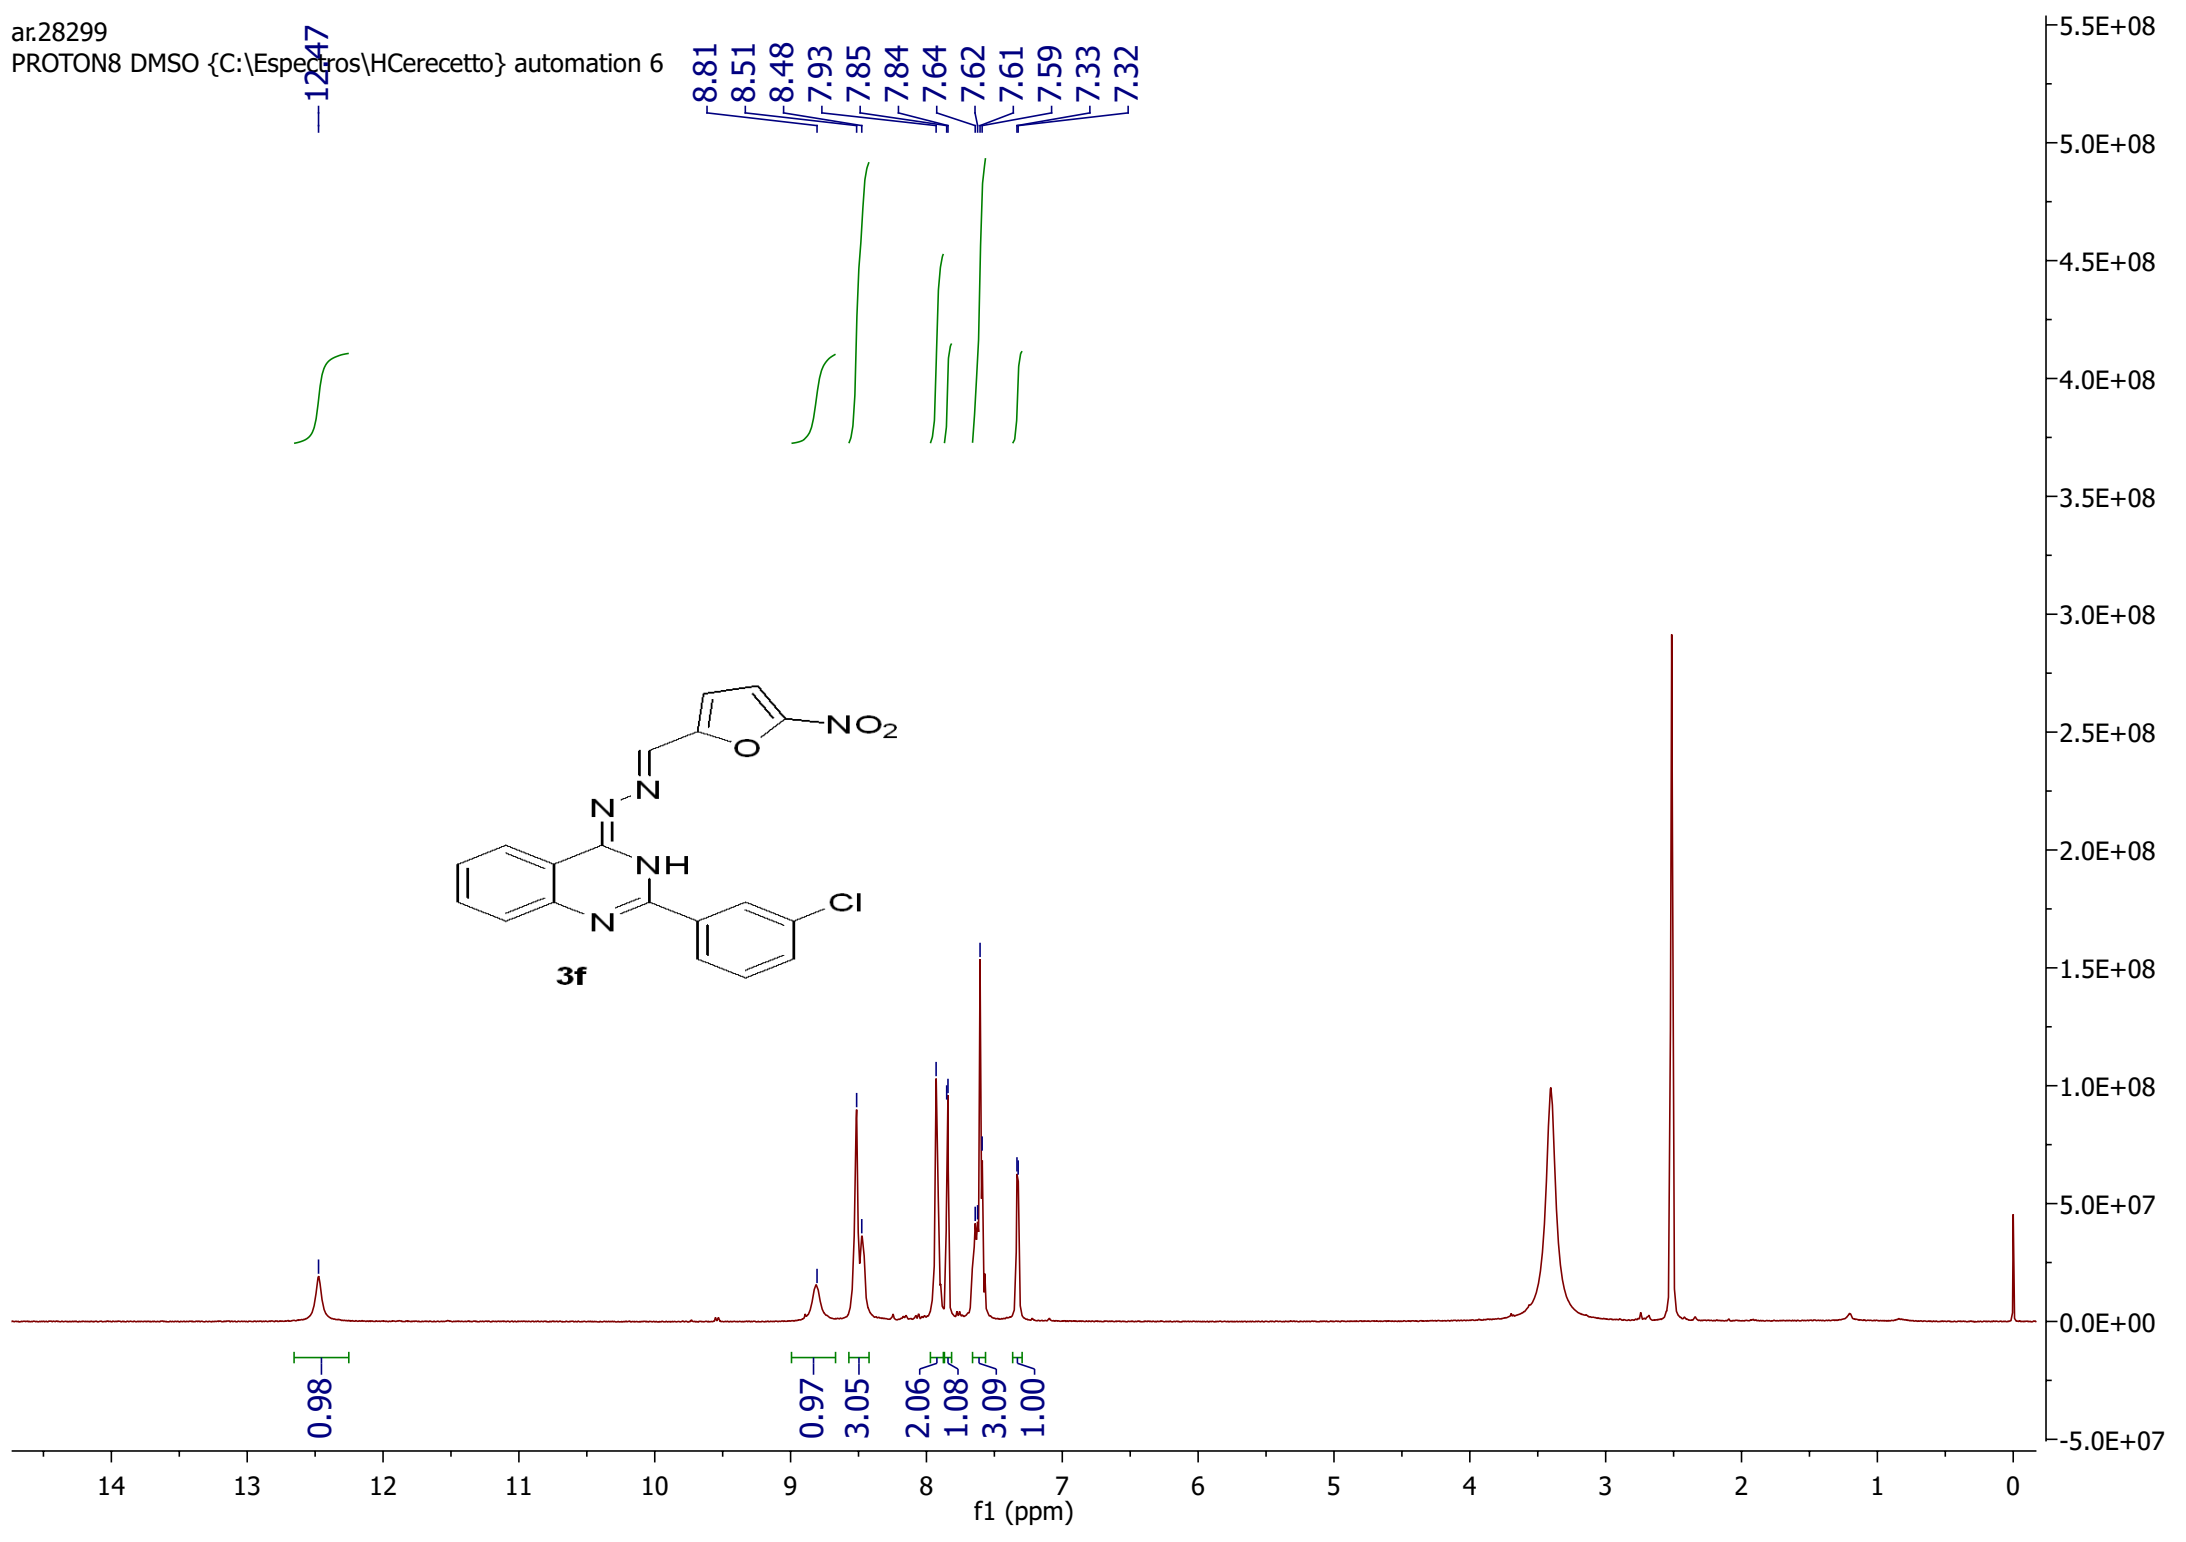

ar.28299  
PROTON8 DMSO {C:\Espectros\HCerecetto} automation 6

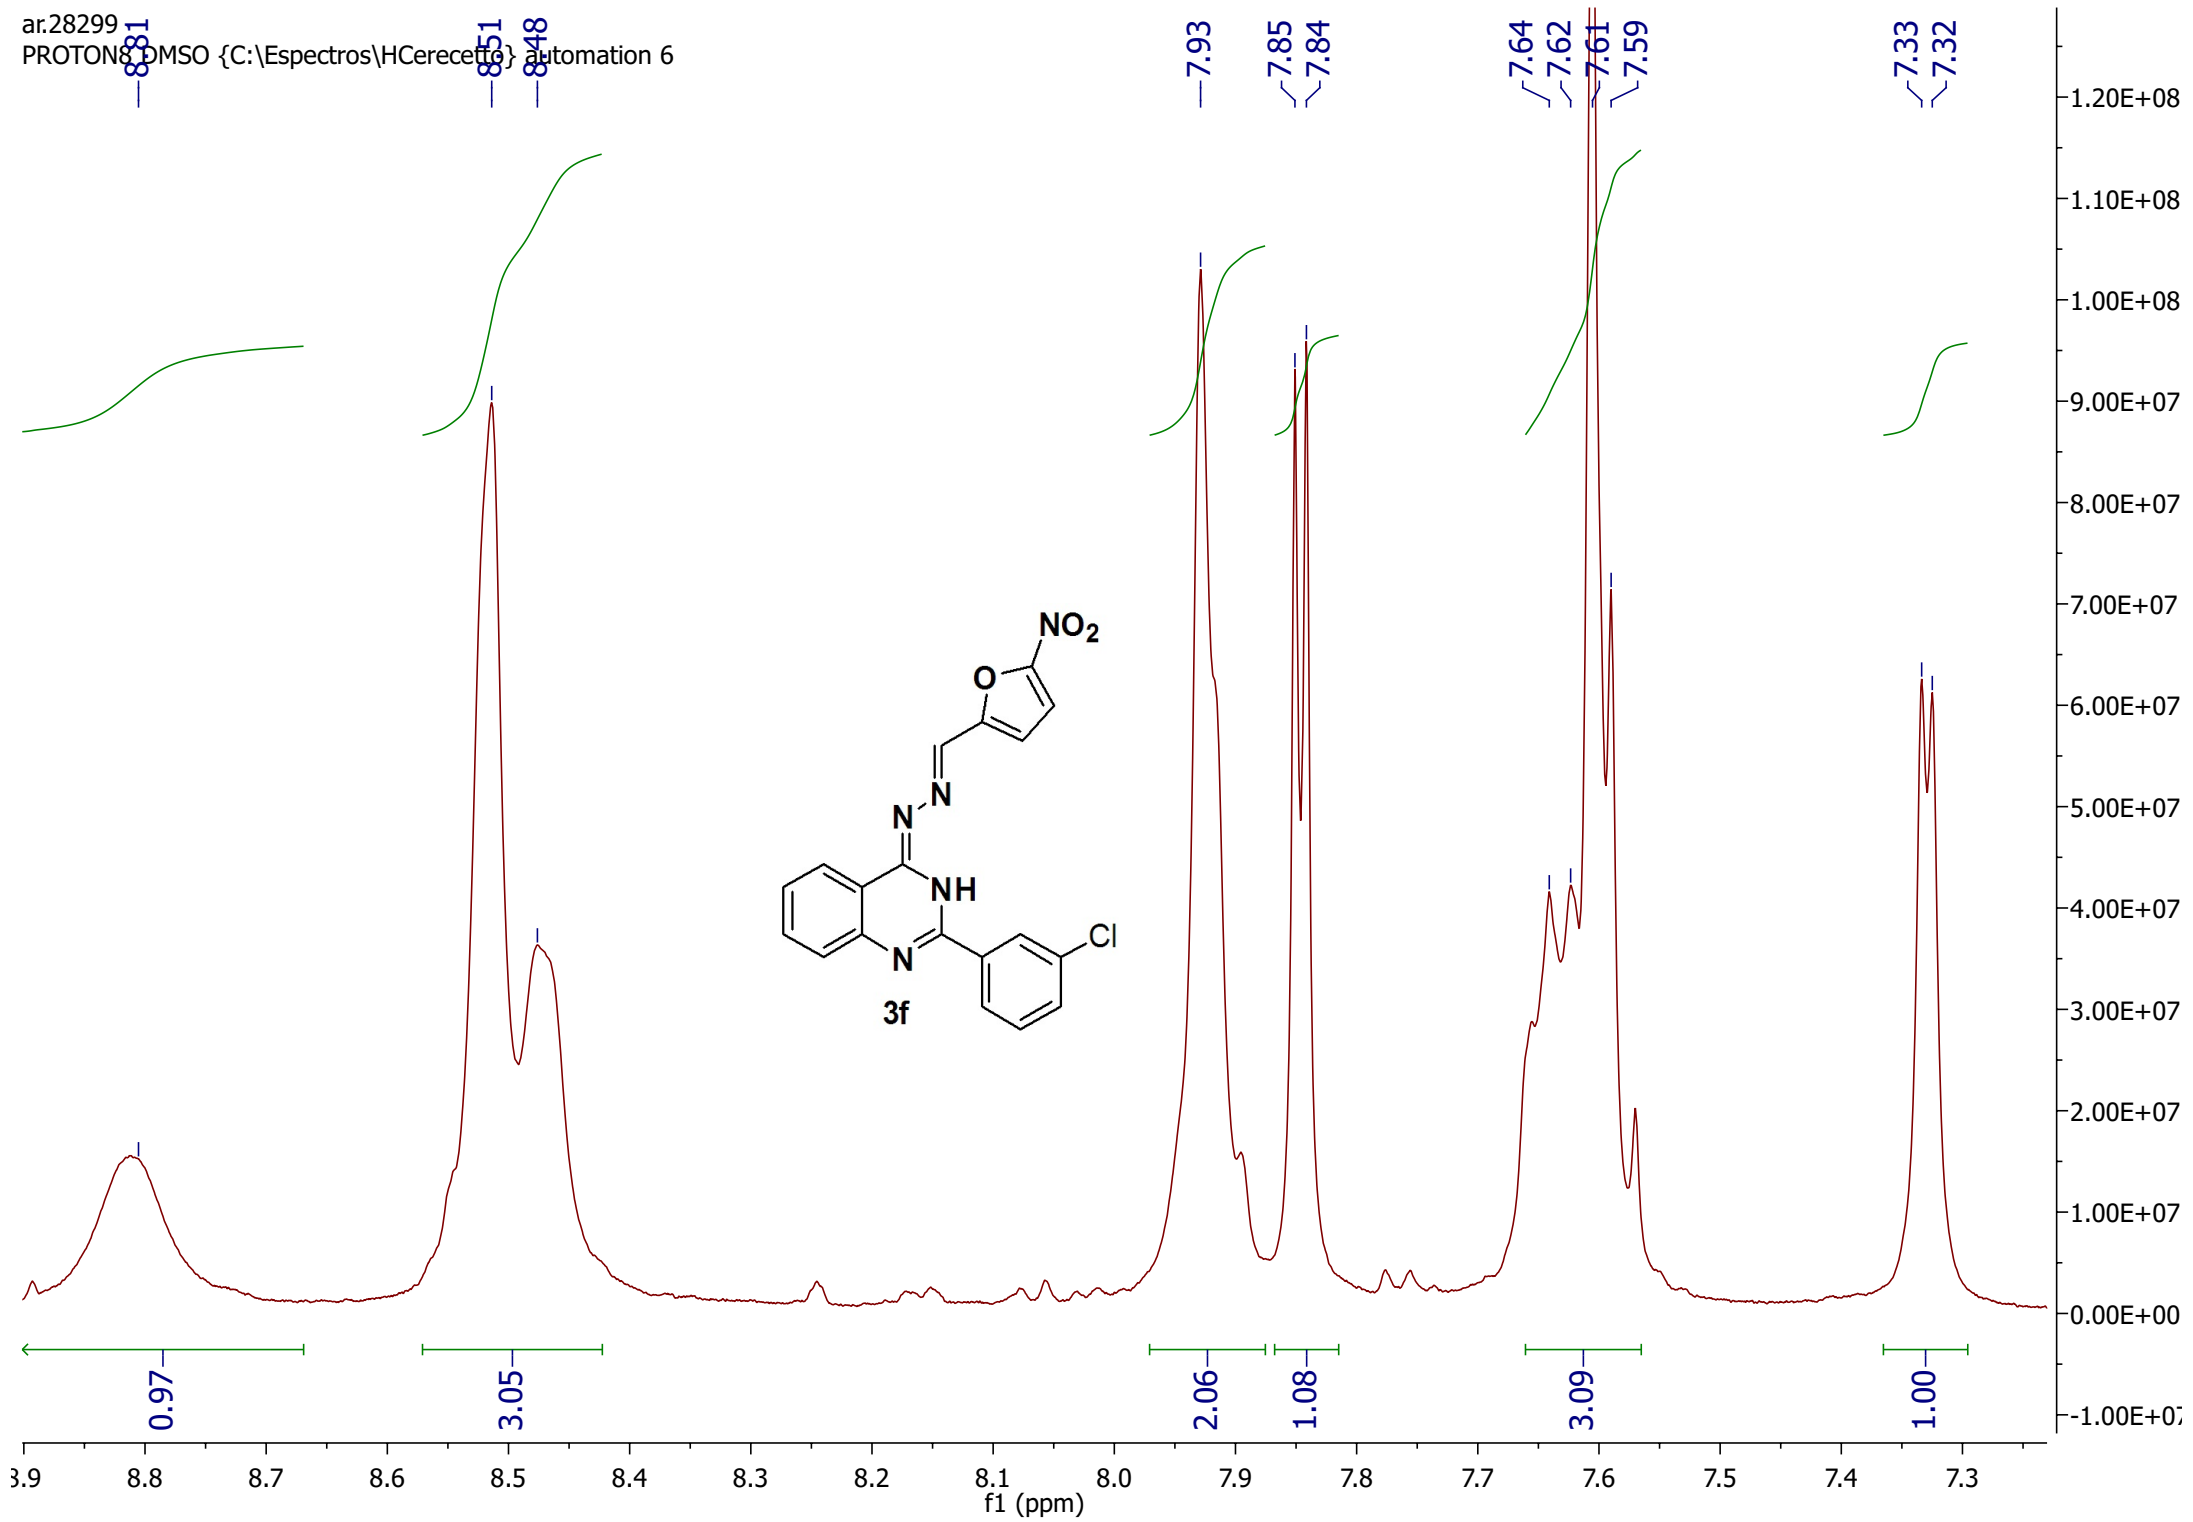

ar.28299  
Angel AR-30Mef  
C13CPD DMSO {C:\Espectros\HCereceto\Automatico 6

158.04  
157.52  
152.66  
152.30  
151.57  
134.28  
133.85  
130.88  
128.13  
126.95  
126.43  
115.02  
113.32

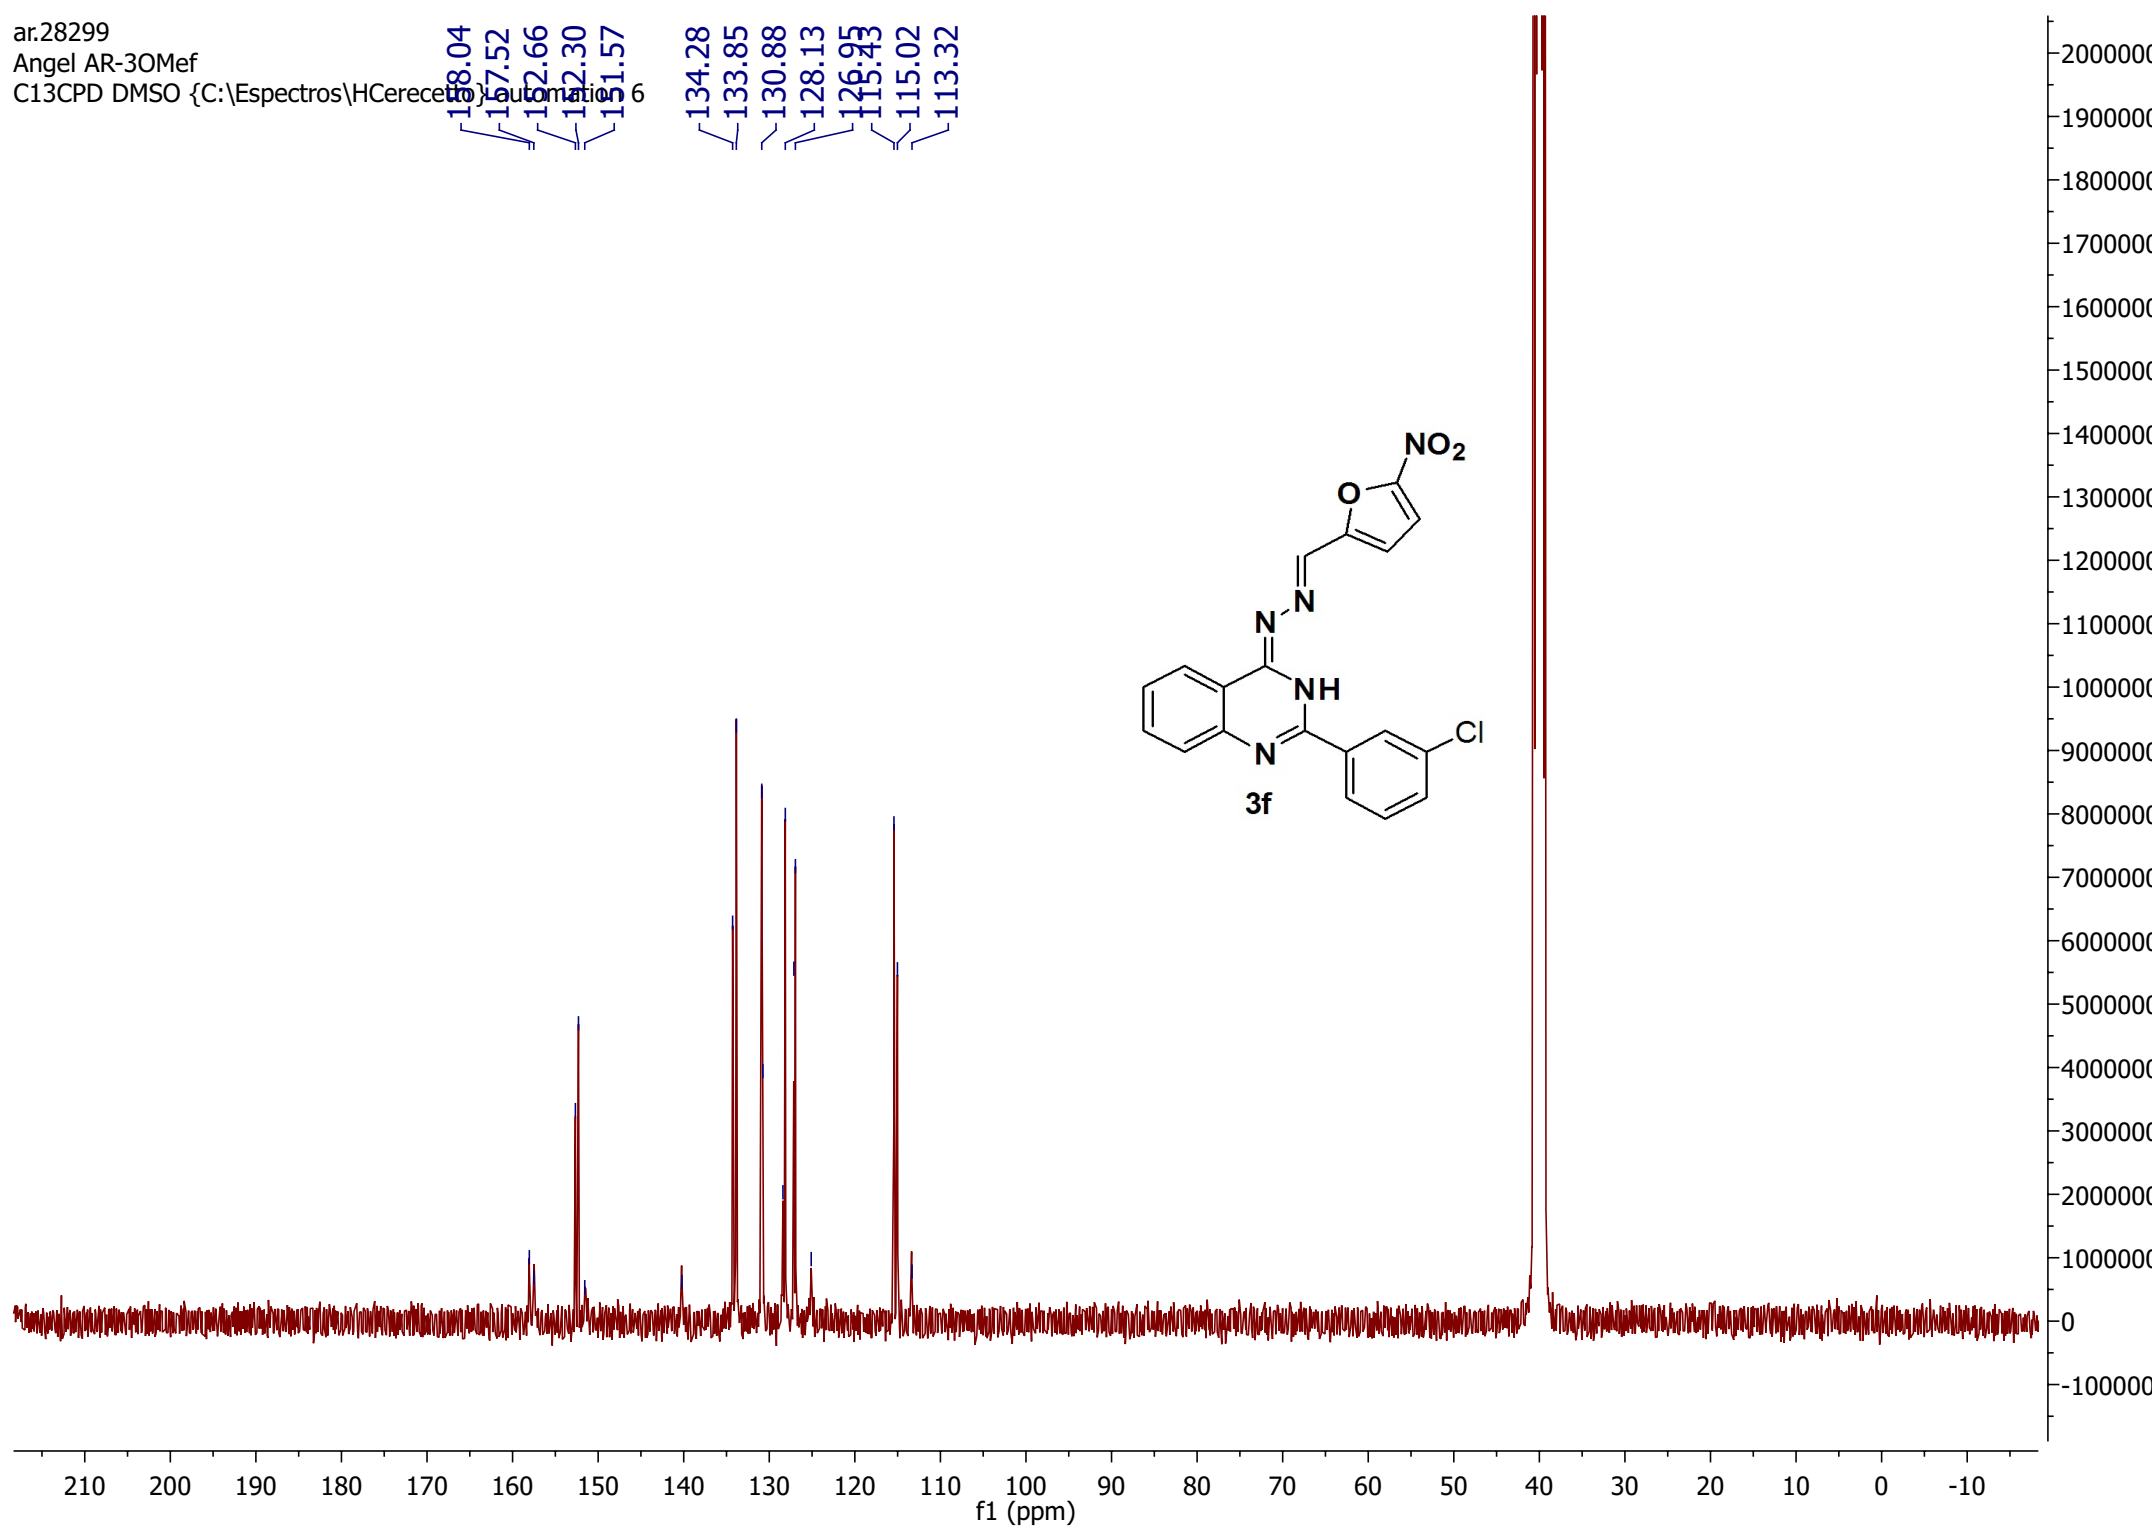

210 200 190 180 170 160 150 140 130 120 110 100 90 80 70 60 50 40 30 20 10 0 -10  
f1 (ppm)

ar.28299  
Angel AR-30Mef  
C13CPD 5MSO {C:\Spectro\Hogeretto} automation 6

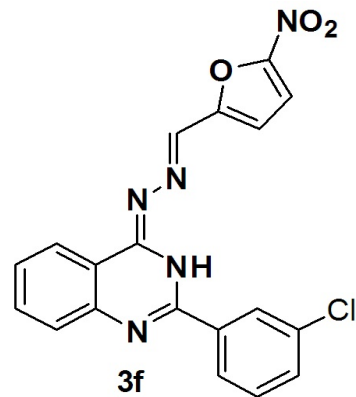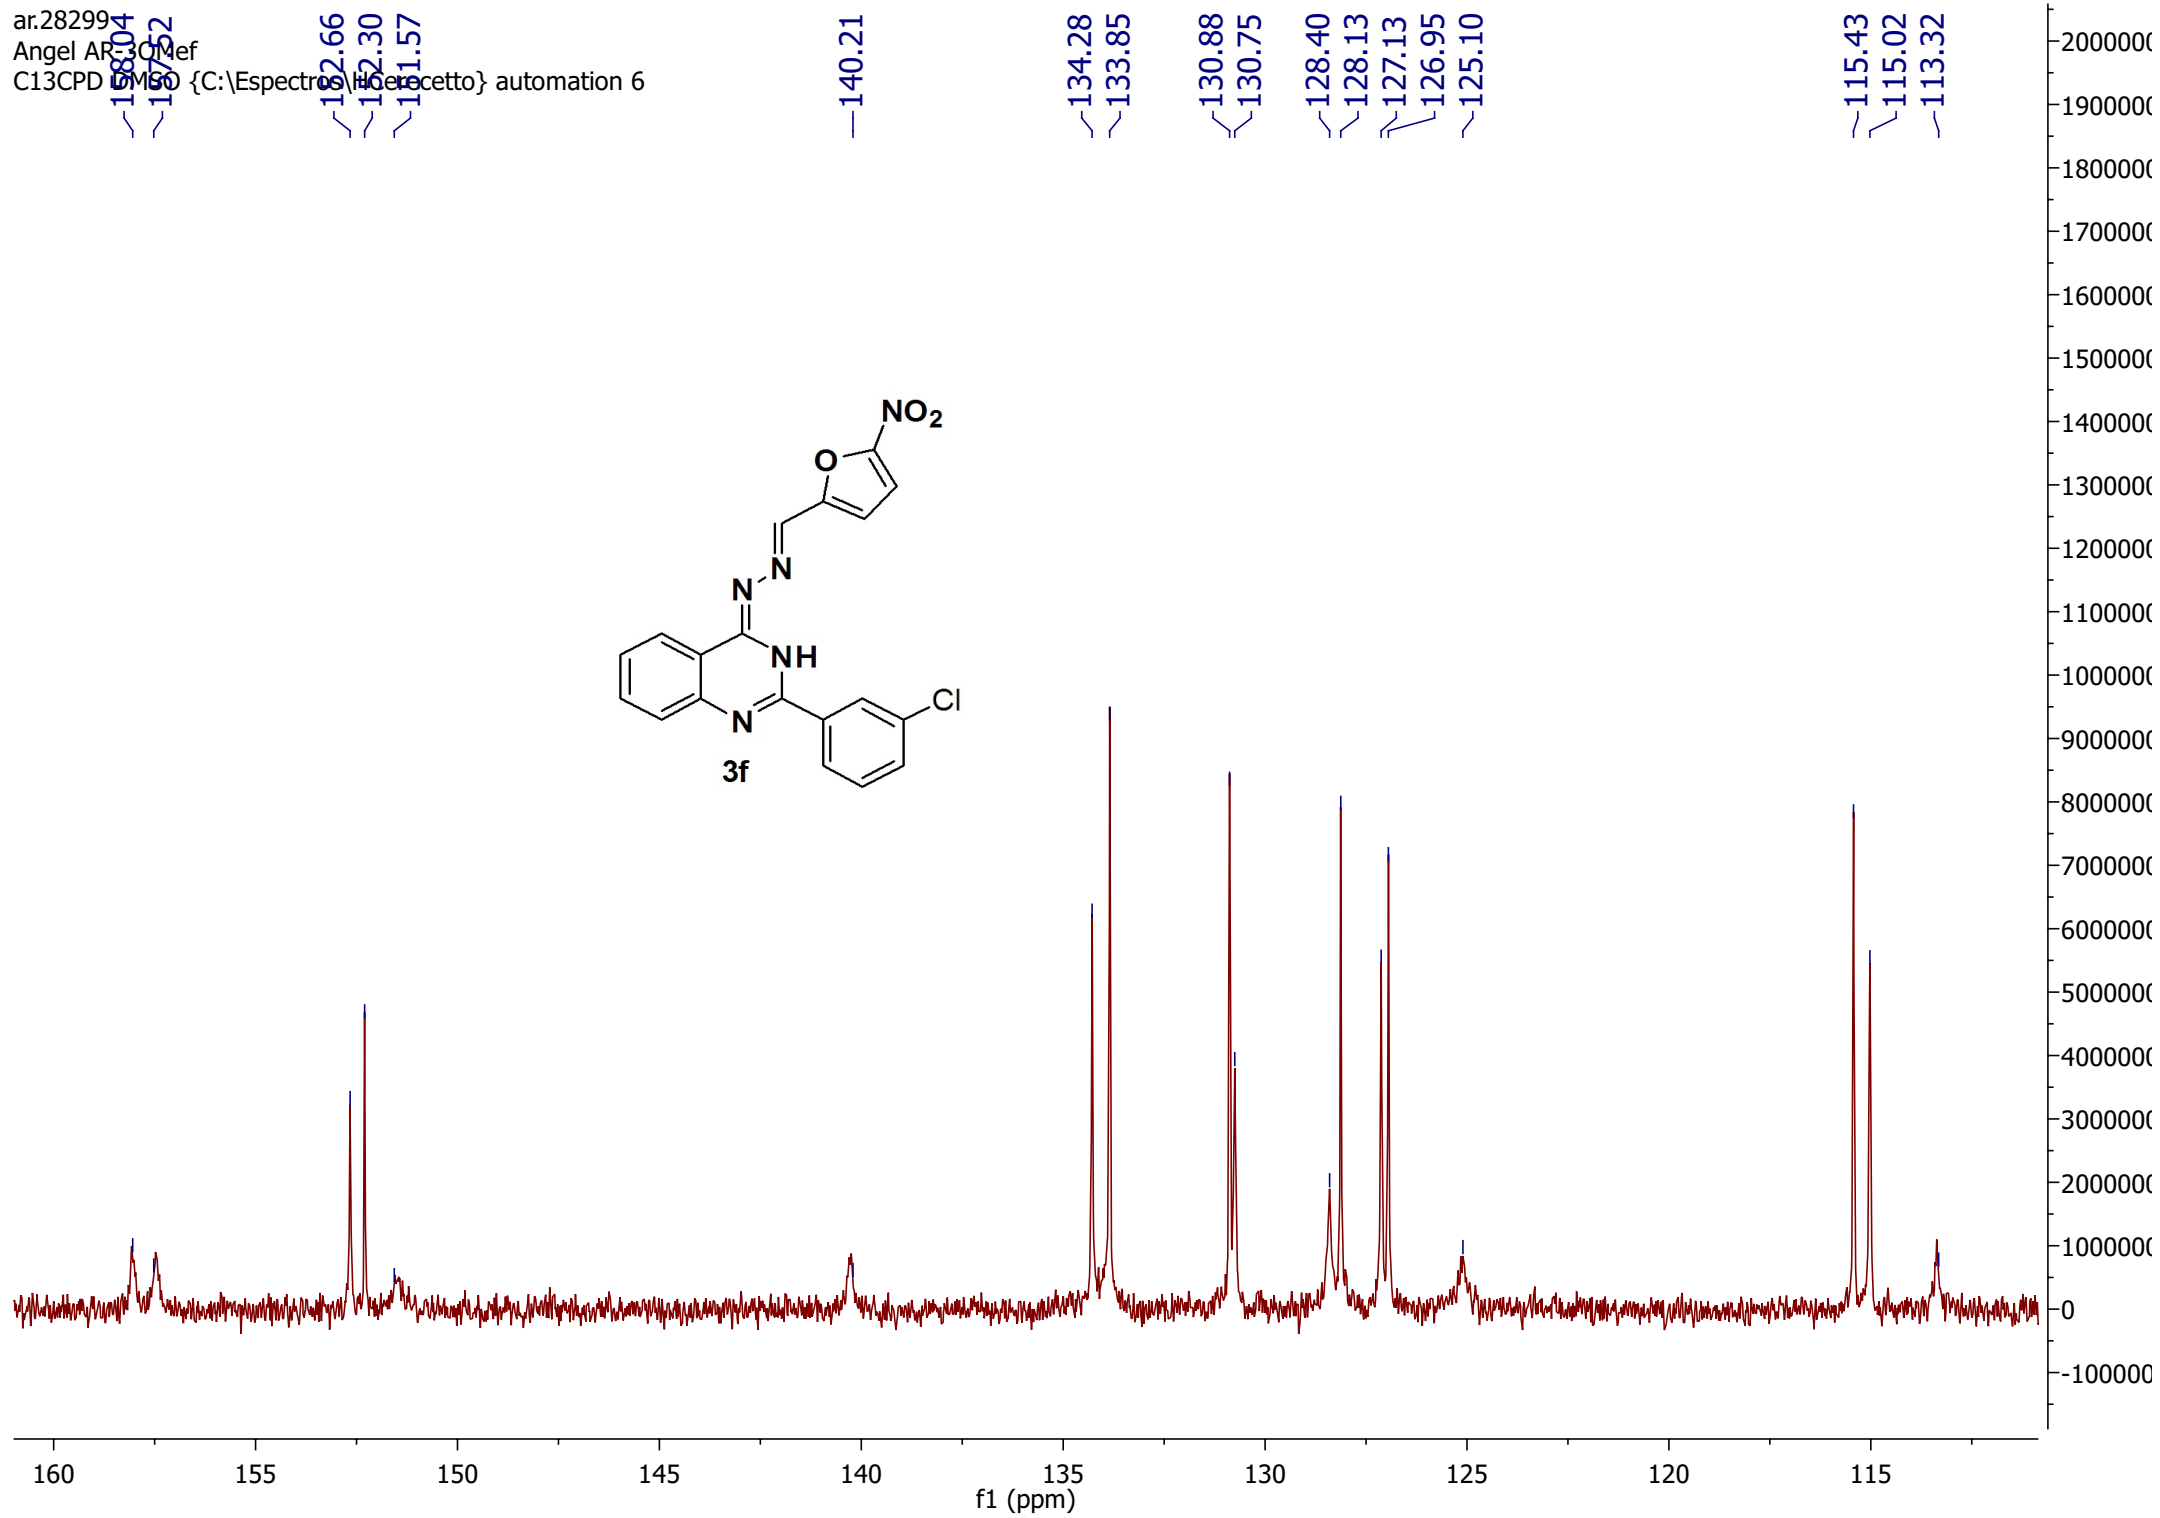

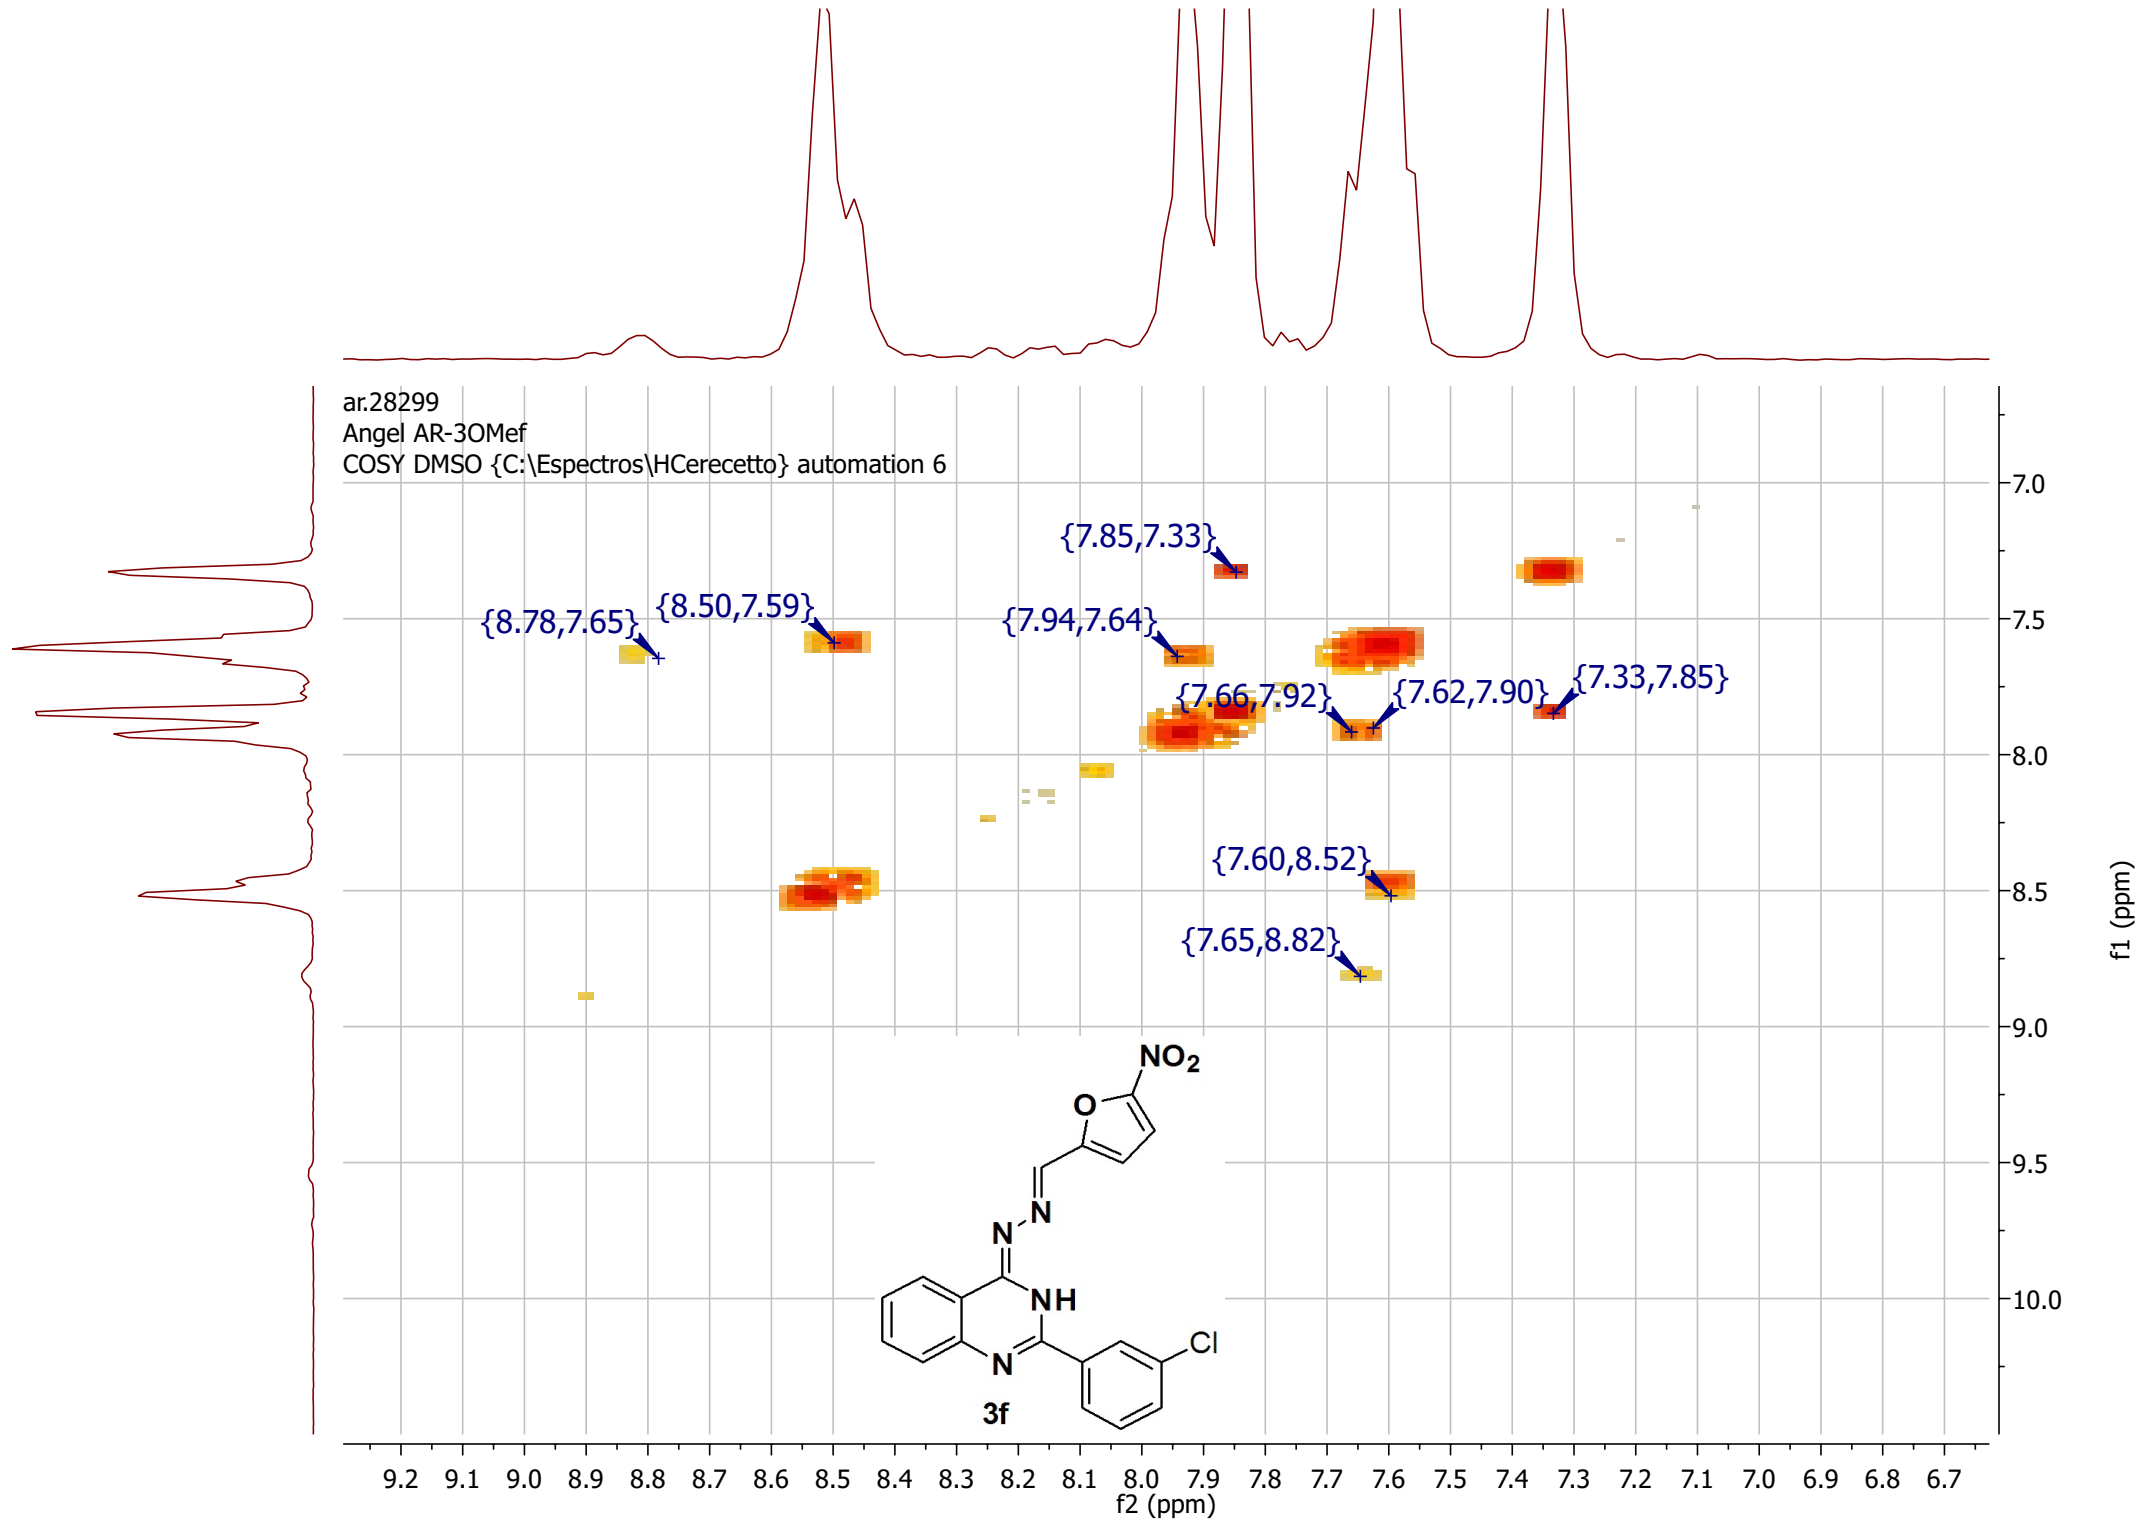



ar.28299  
Angel AR-30Mef  
COSY DMSO {C:\Espectros\HCerecetto} automation 6

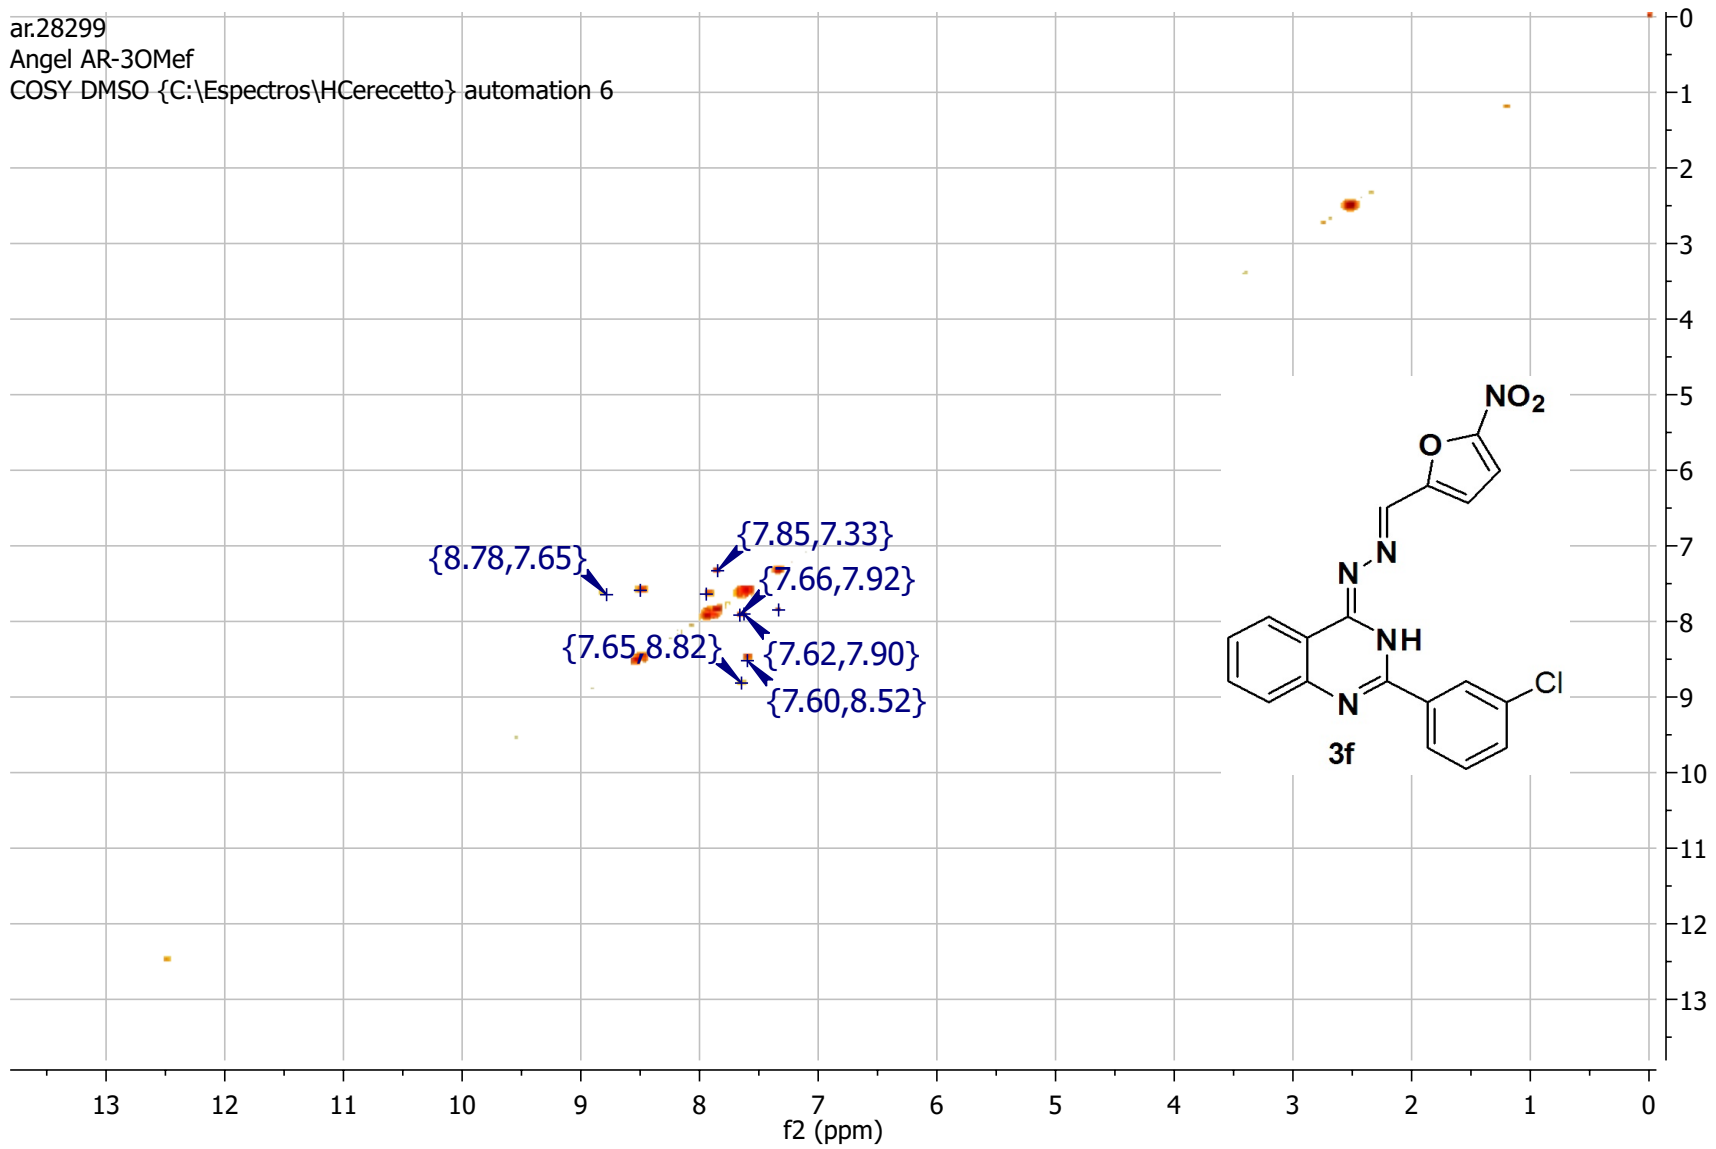

f1 (ppm)

f2 (ppm)

Q3Cl\_ar.28299/4\_NOESY  
PROTON8 DMSO {C:\Espectros\{Cerecetto} automation 6

1D Selective Gradient NOESY  
freq: 12.463ppm

12.46

8.51

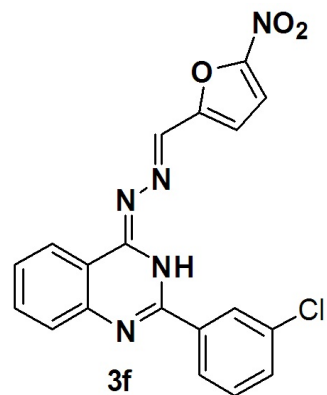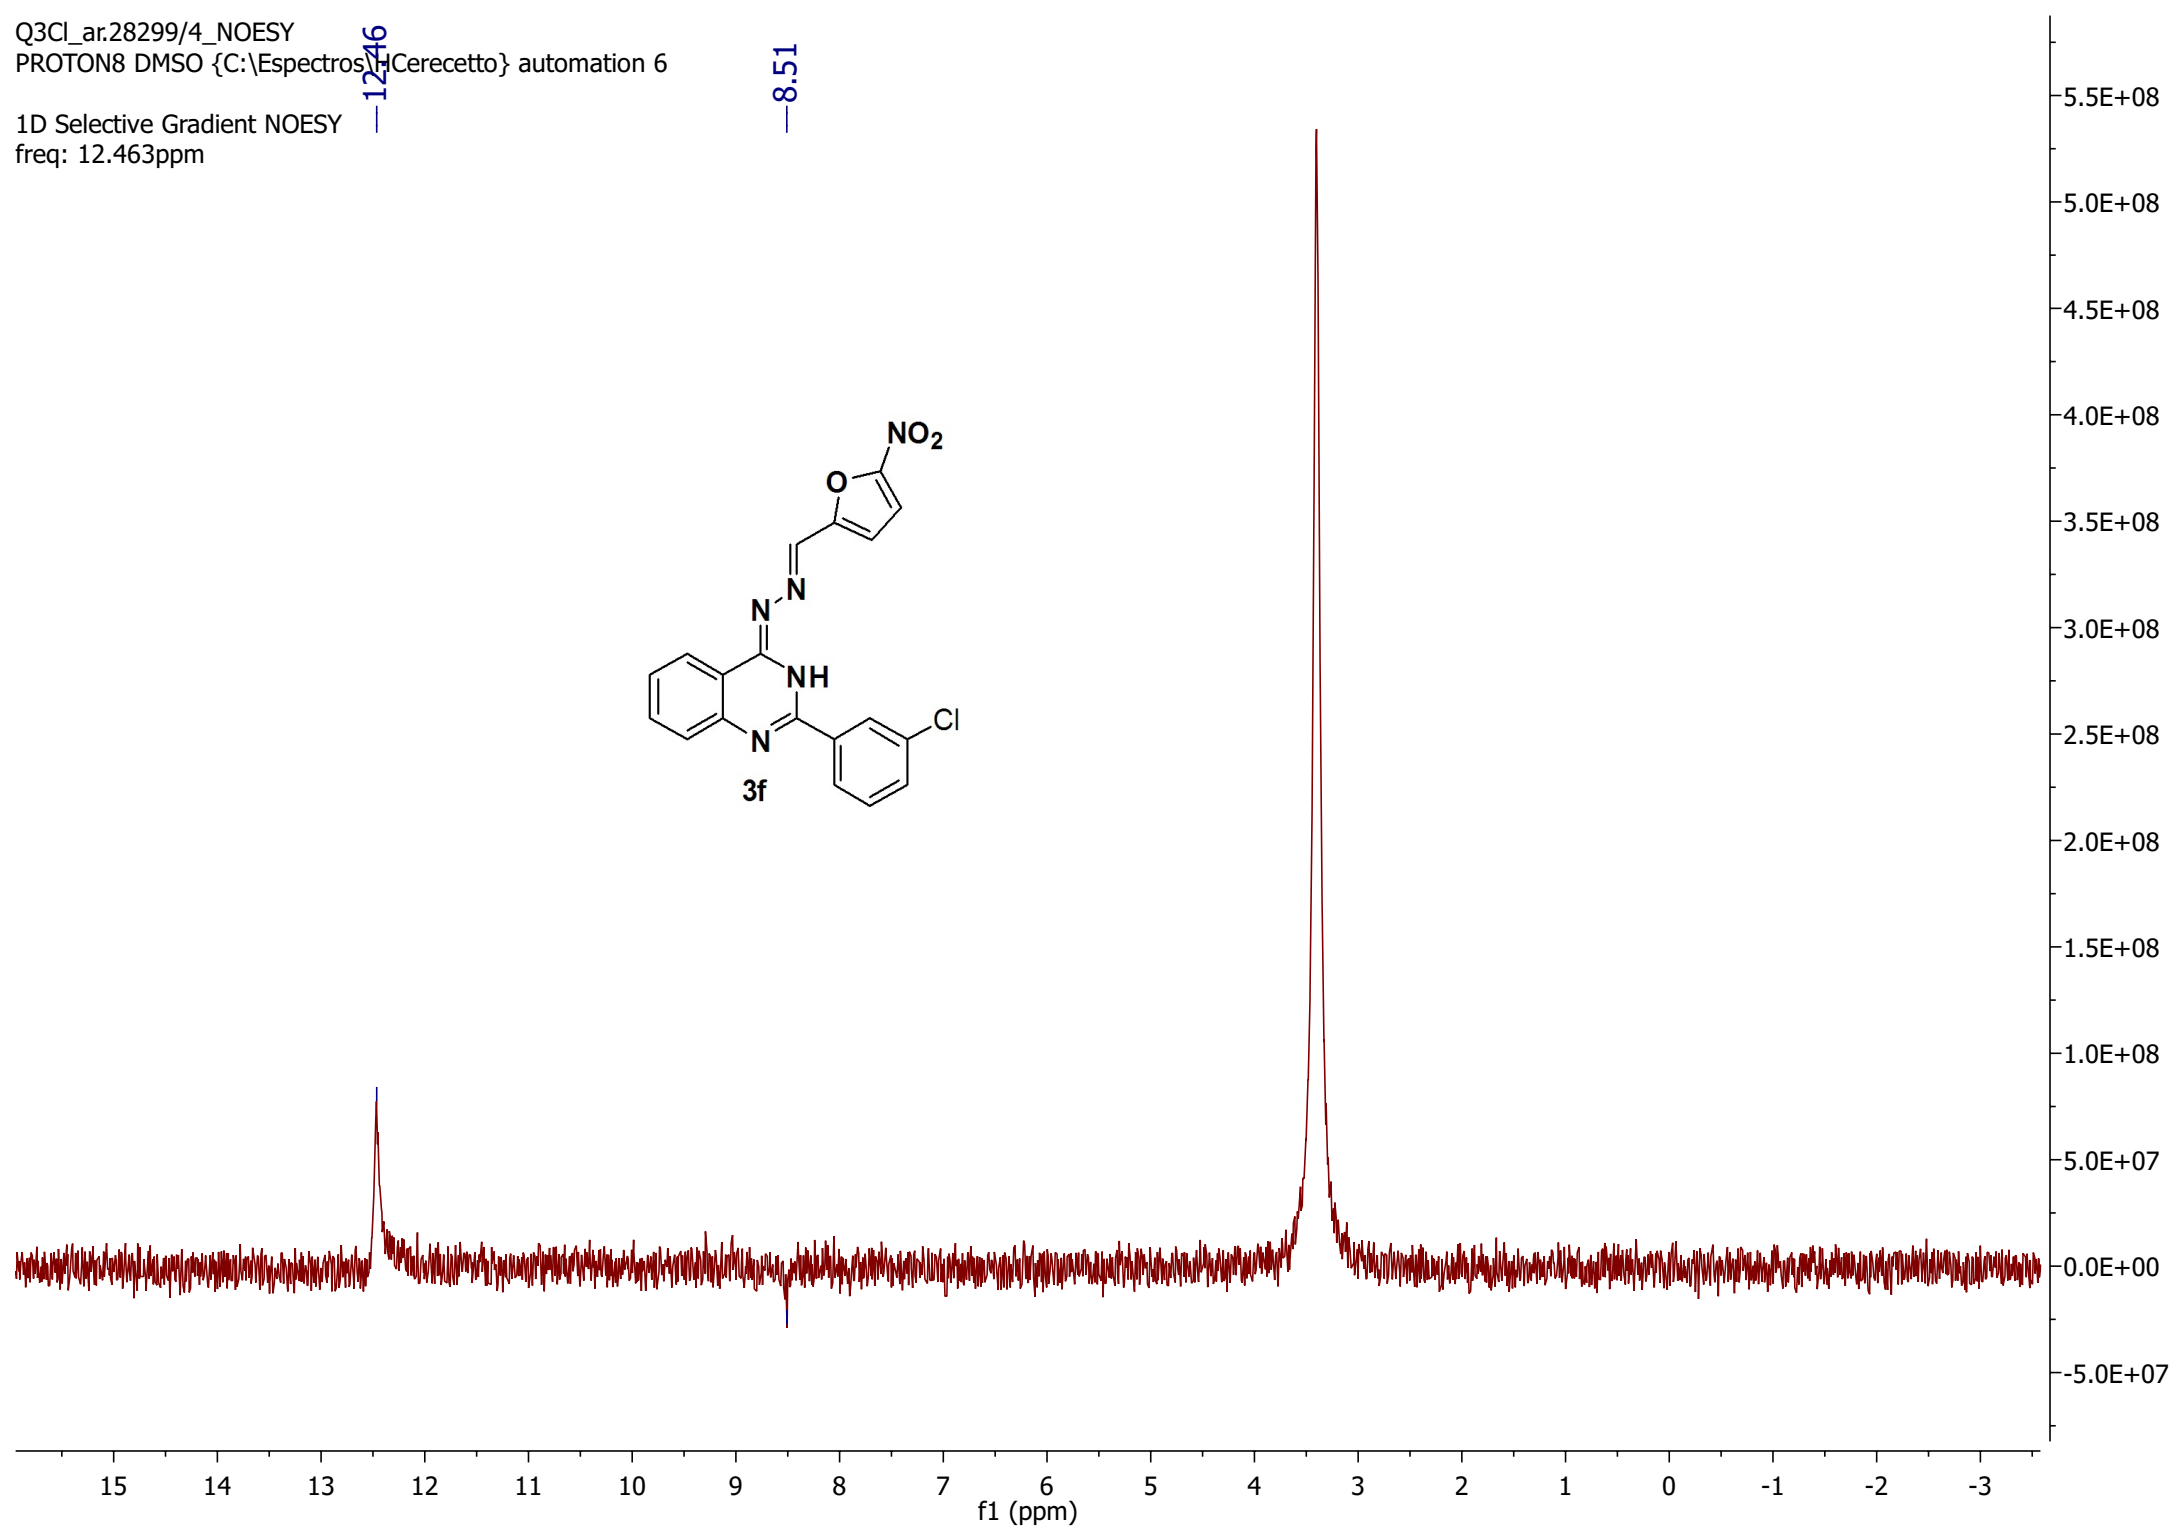

ar.28642.1.1.1r  
Angel AR-Q3Brnew  
PROTON8 DMSO {C:\Espectros\HCerecetto} automation 9

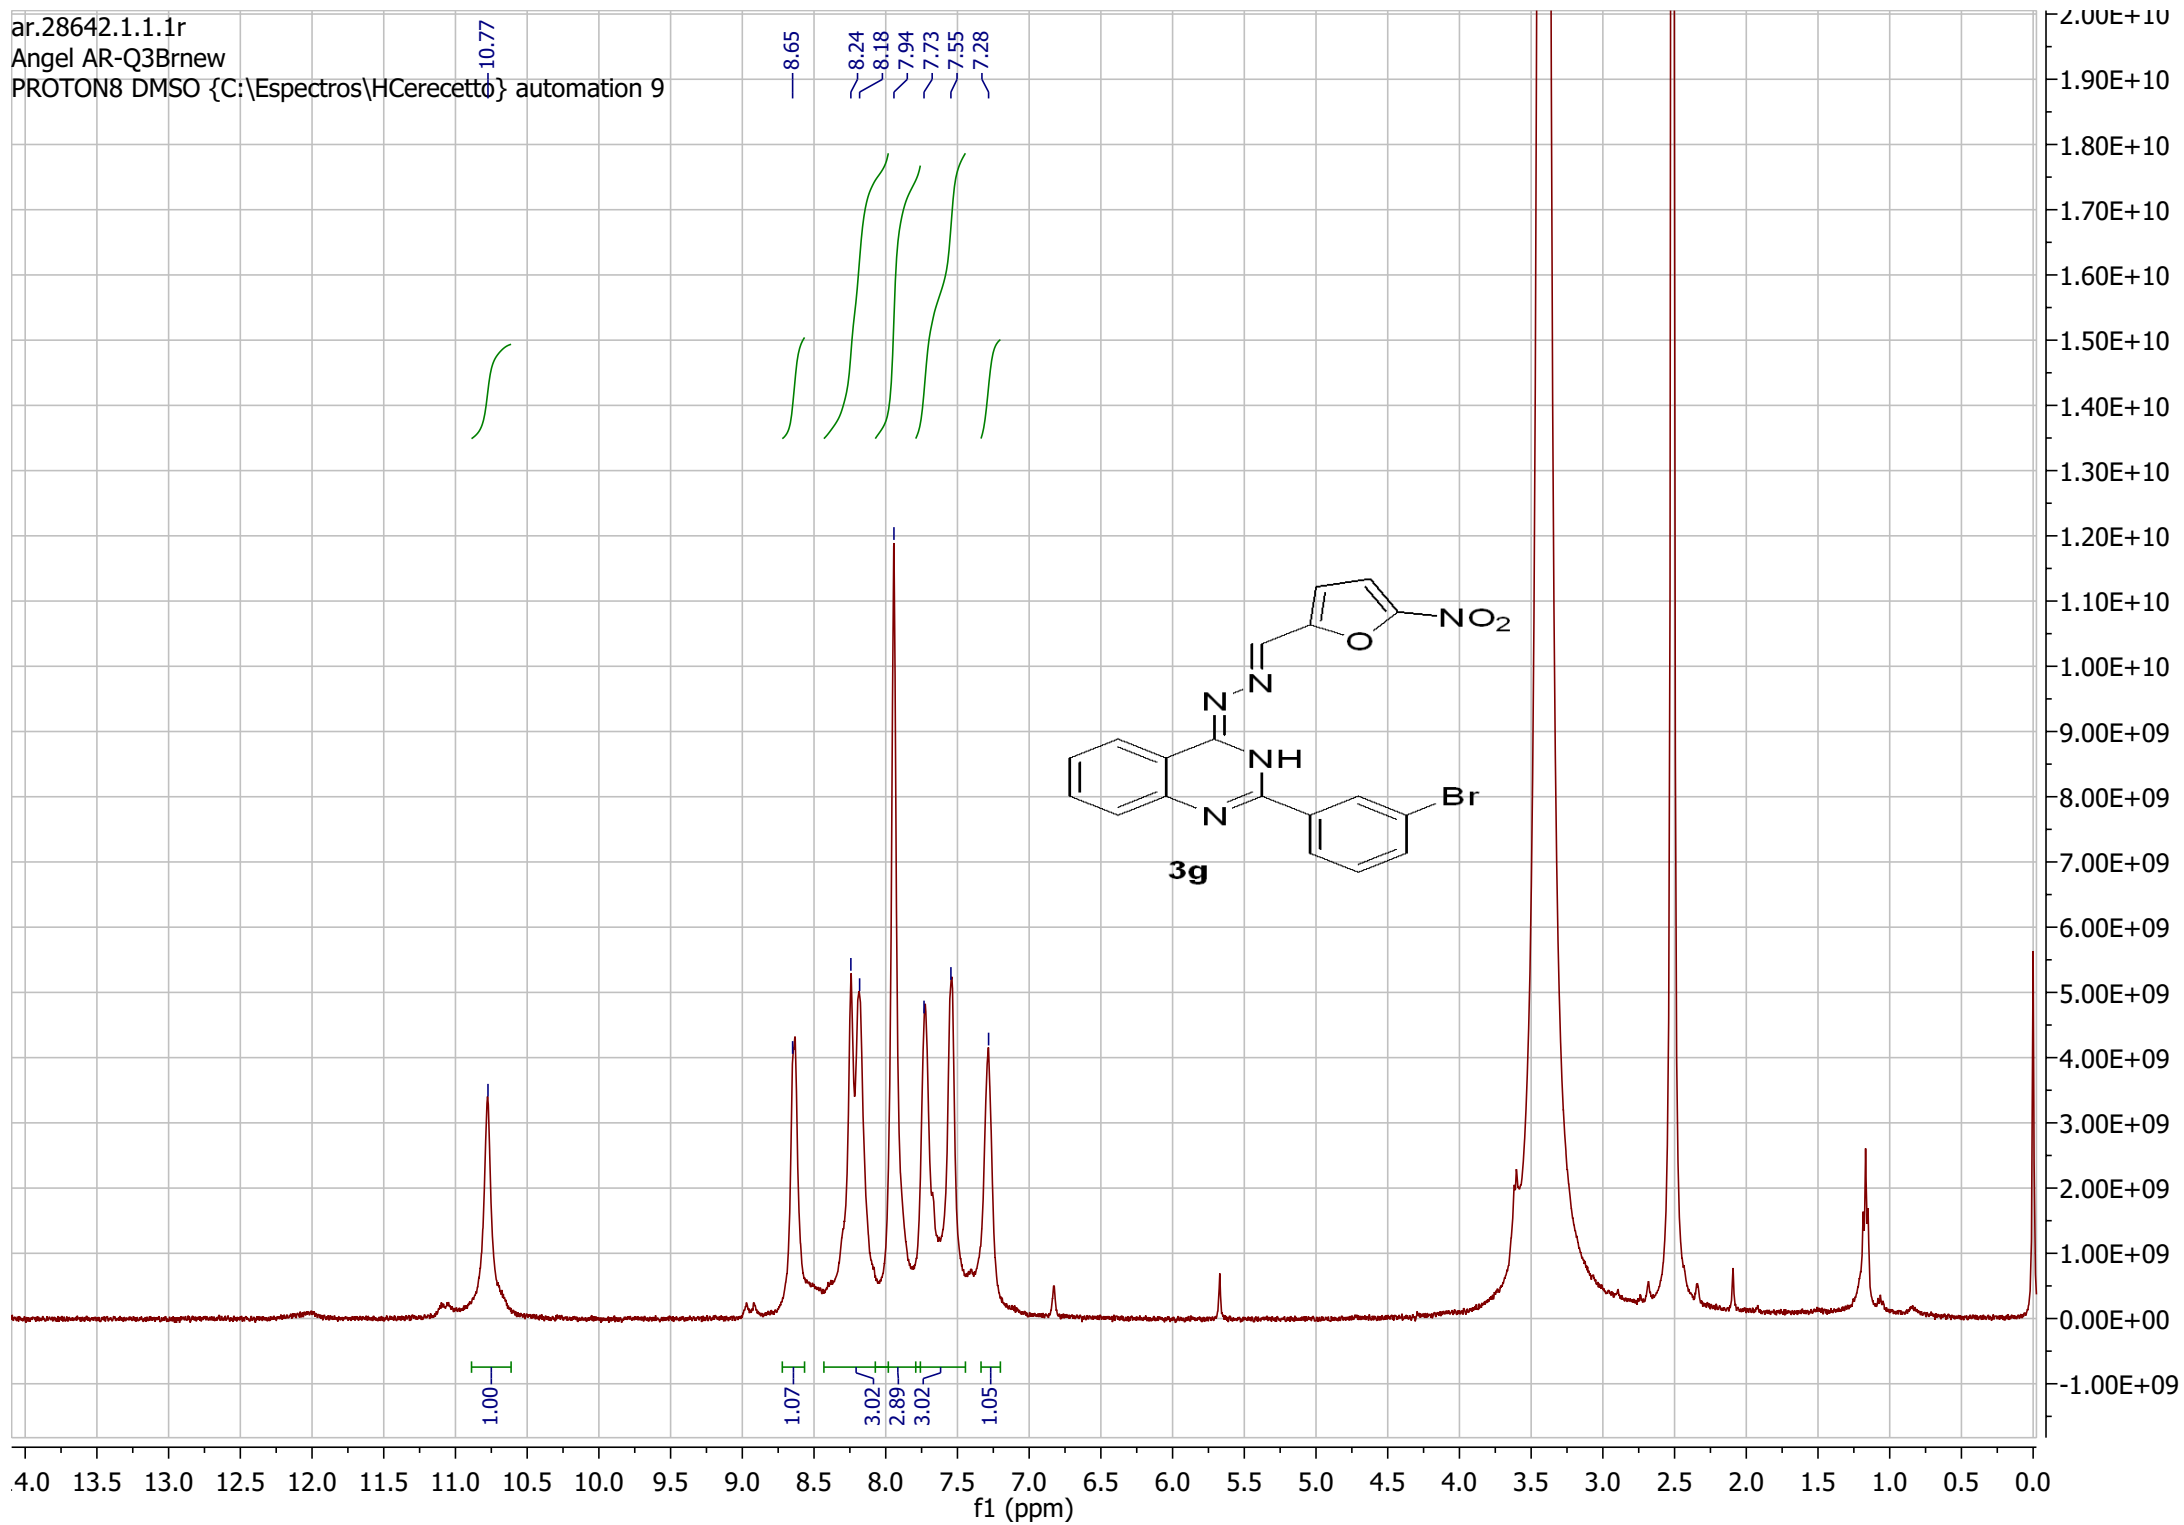

ar.28642.1.1.1r  
Angel AR-Q3Brnew  
PROTON8 DMSO {C:\Espectros\HCerecetto} automation 9

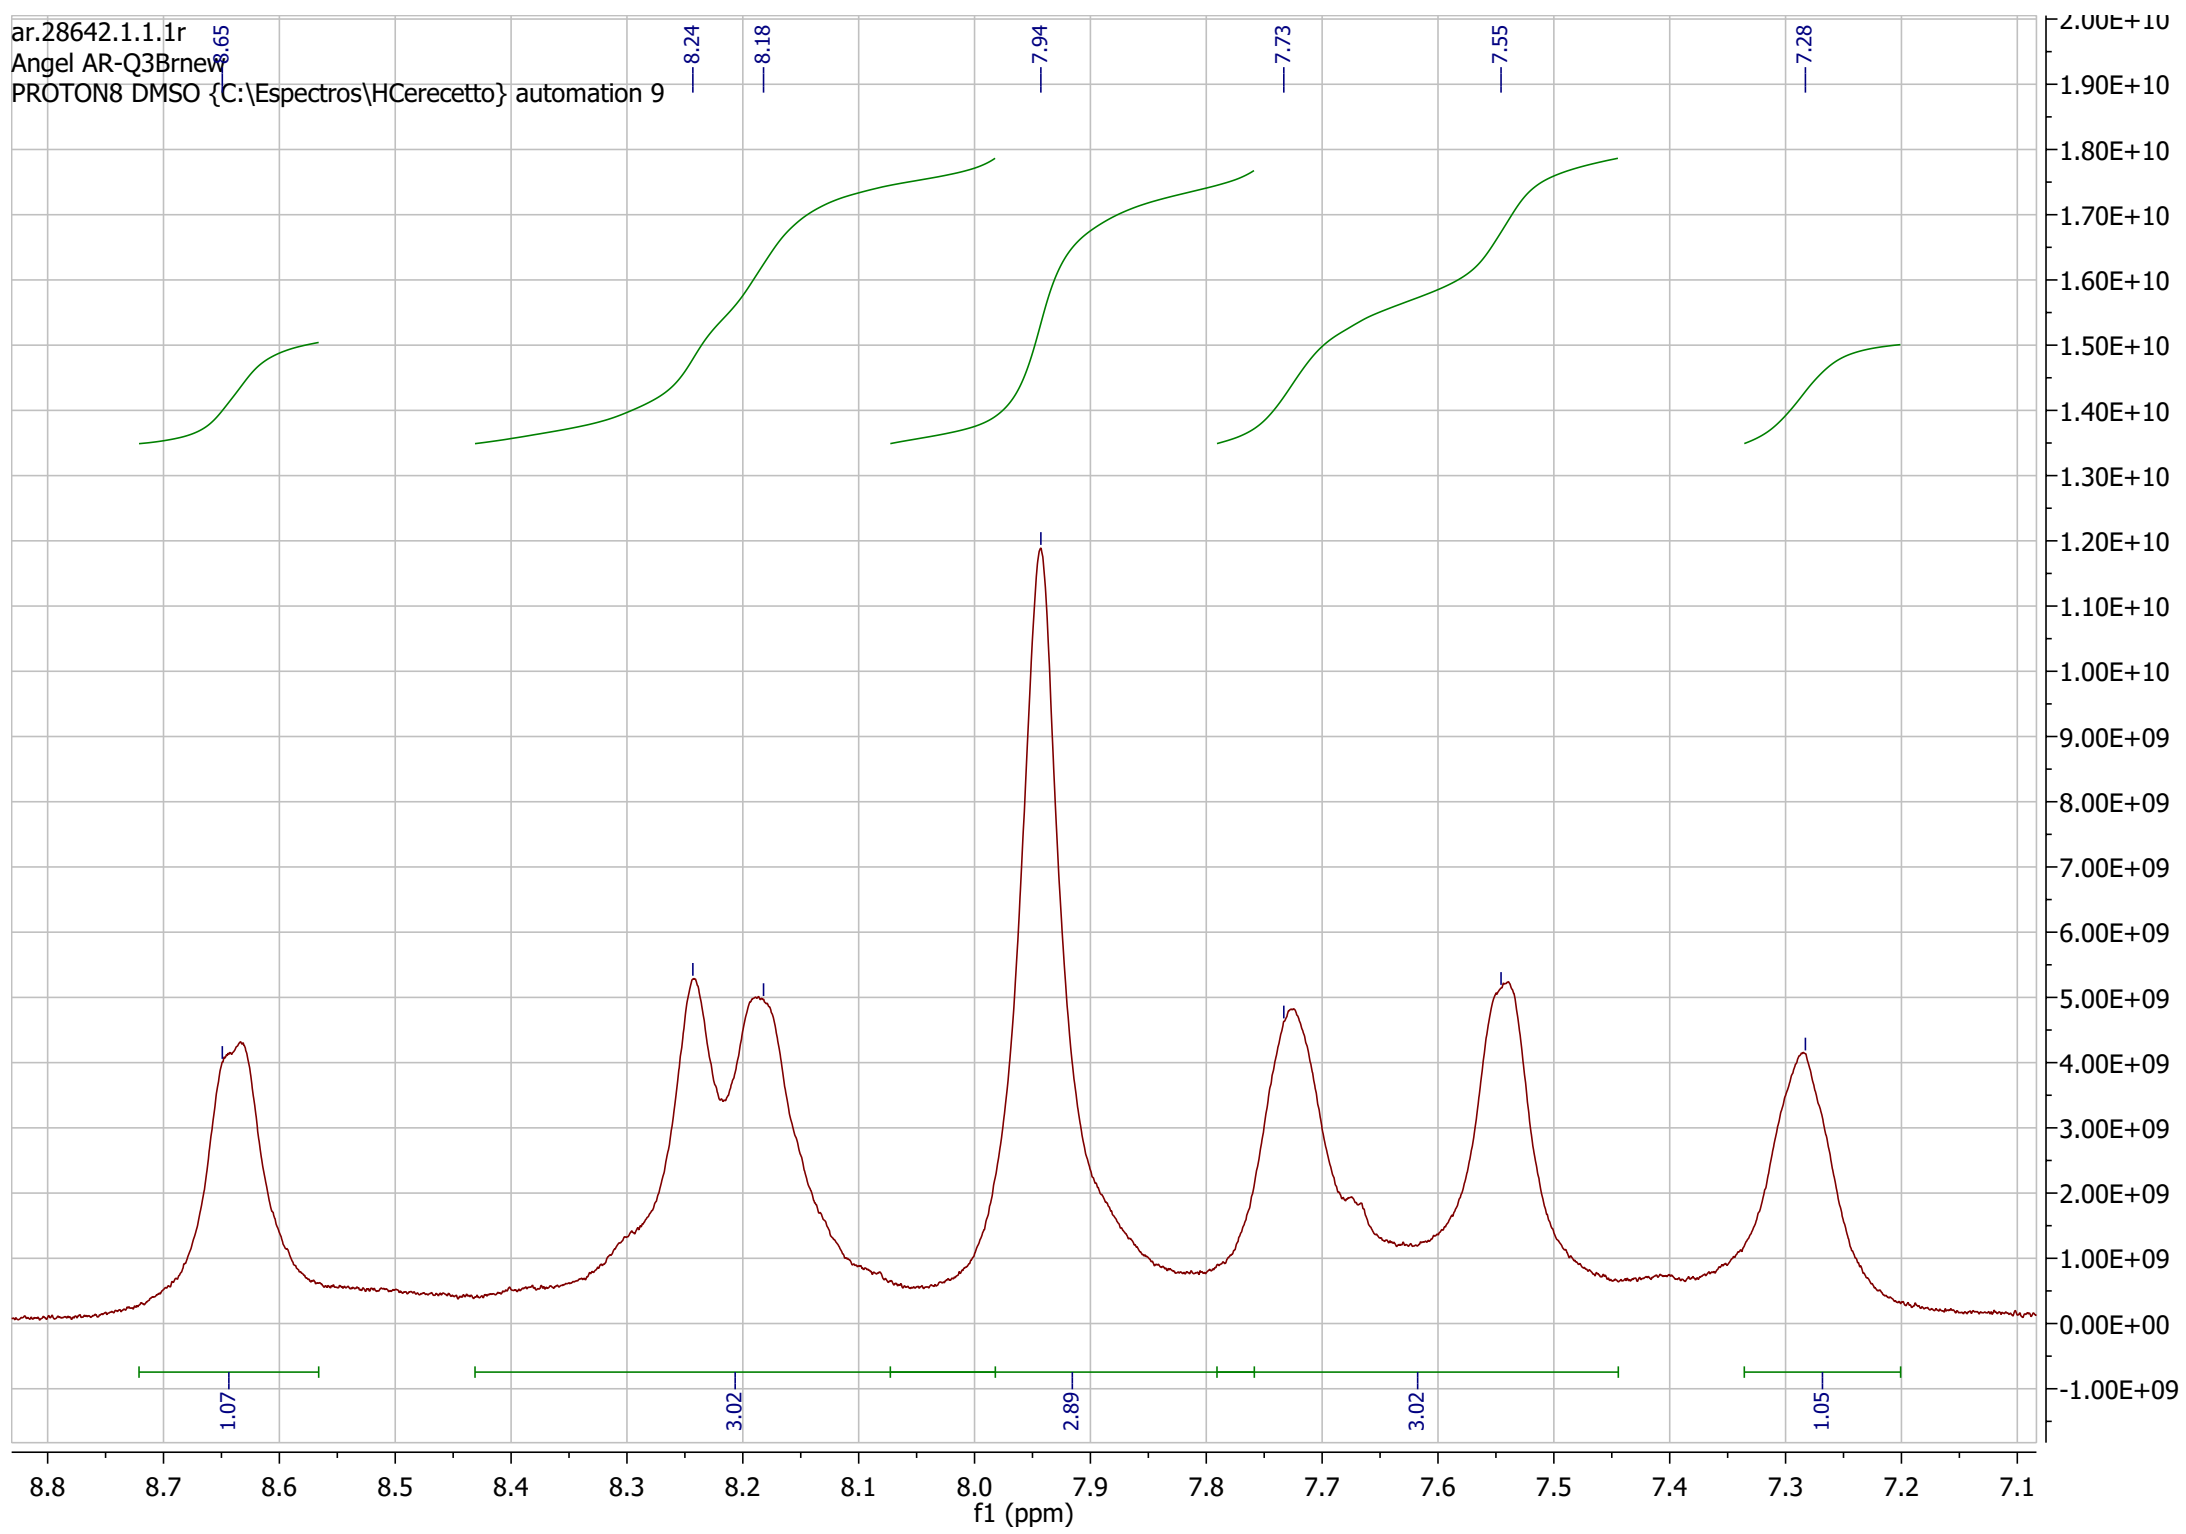

ar.28642.5.1.1r  
Angel AR-Q3Brnew

C13CPD DMSO {C:\Espectros\HCerecetto} automation 1

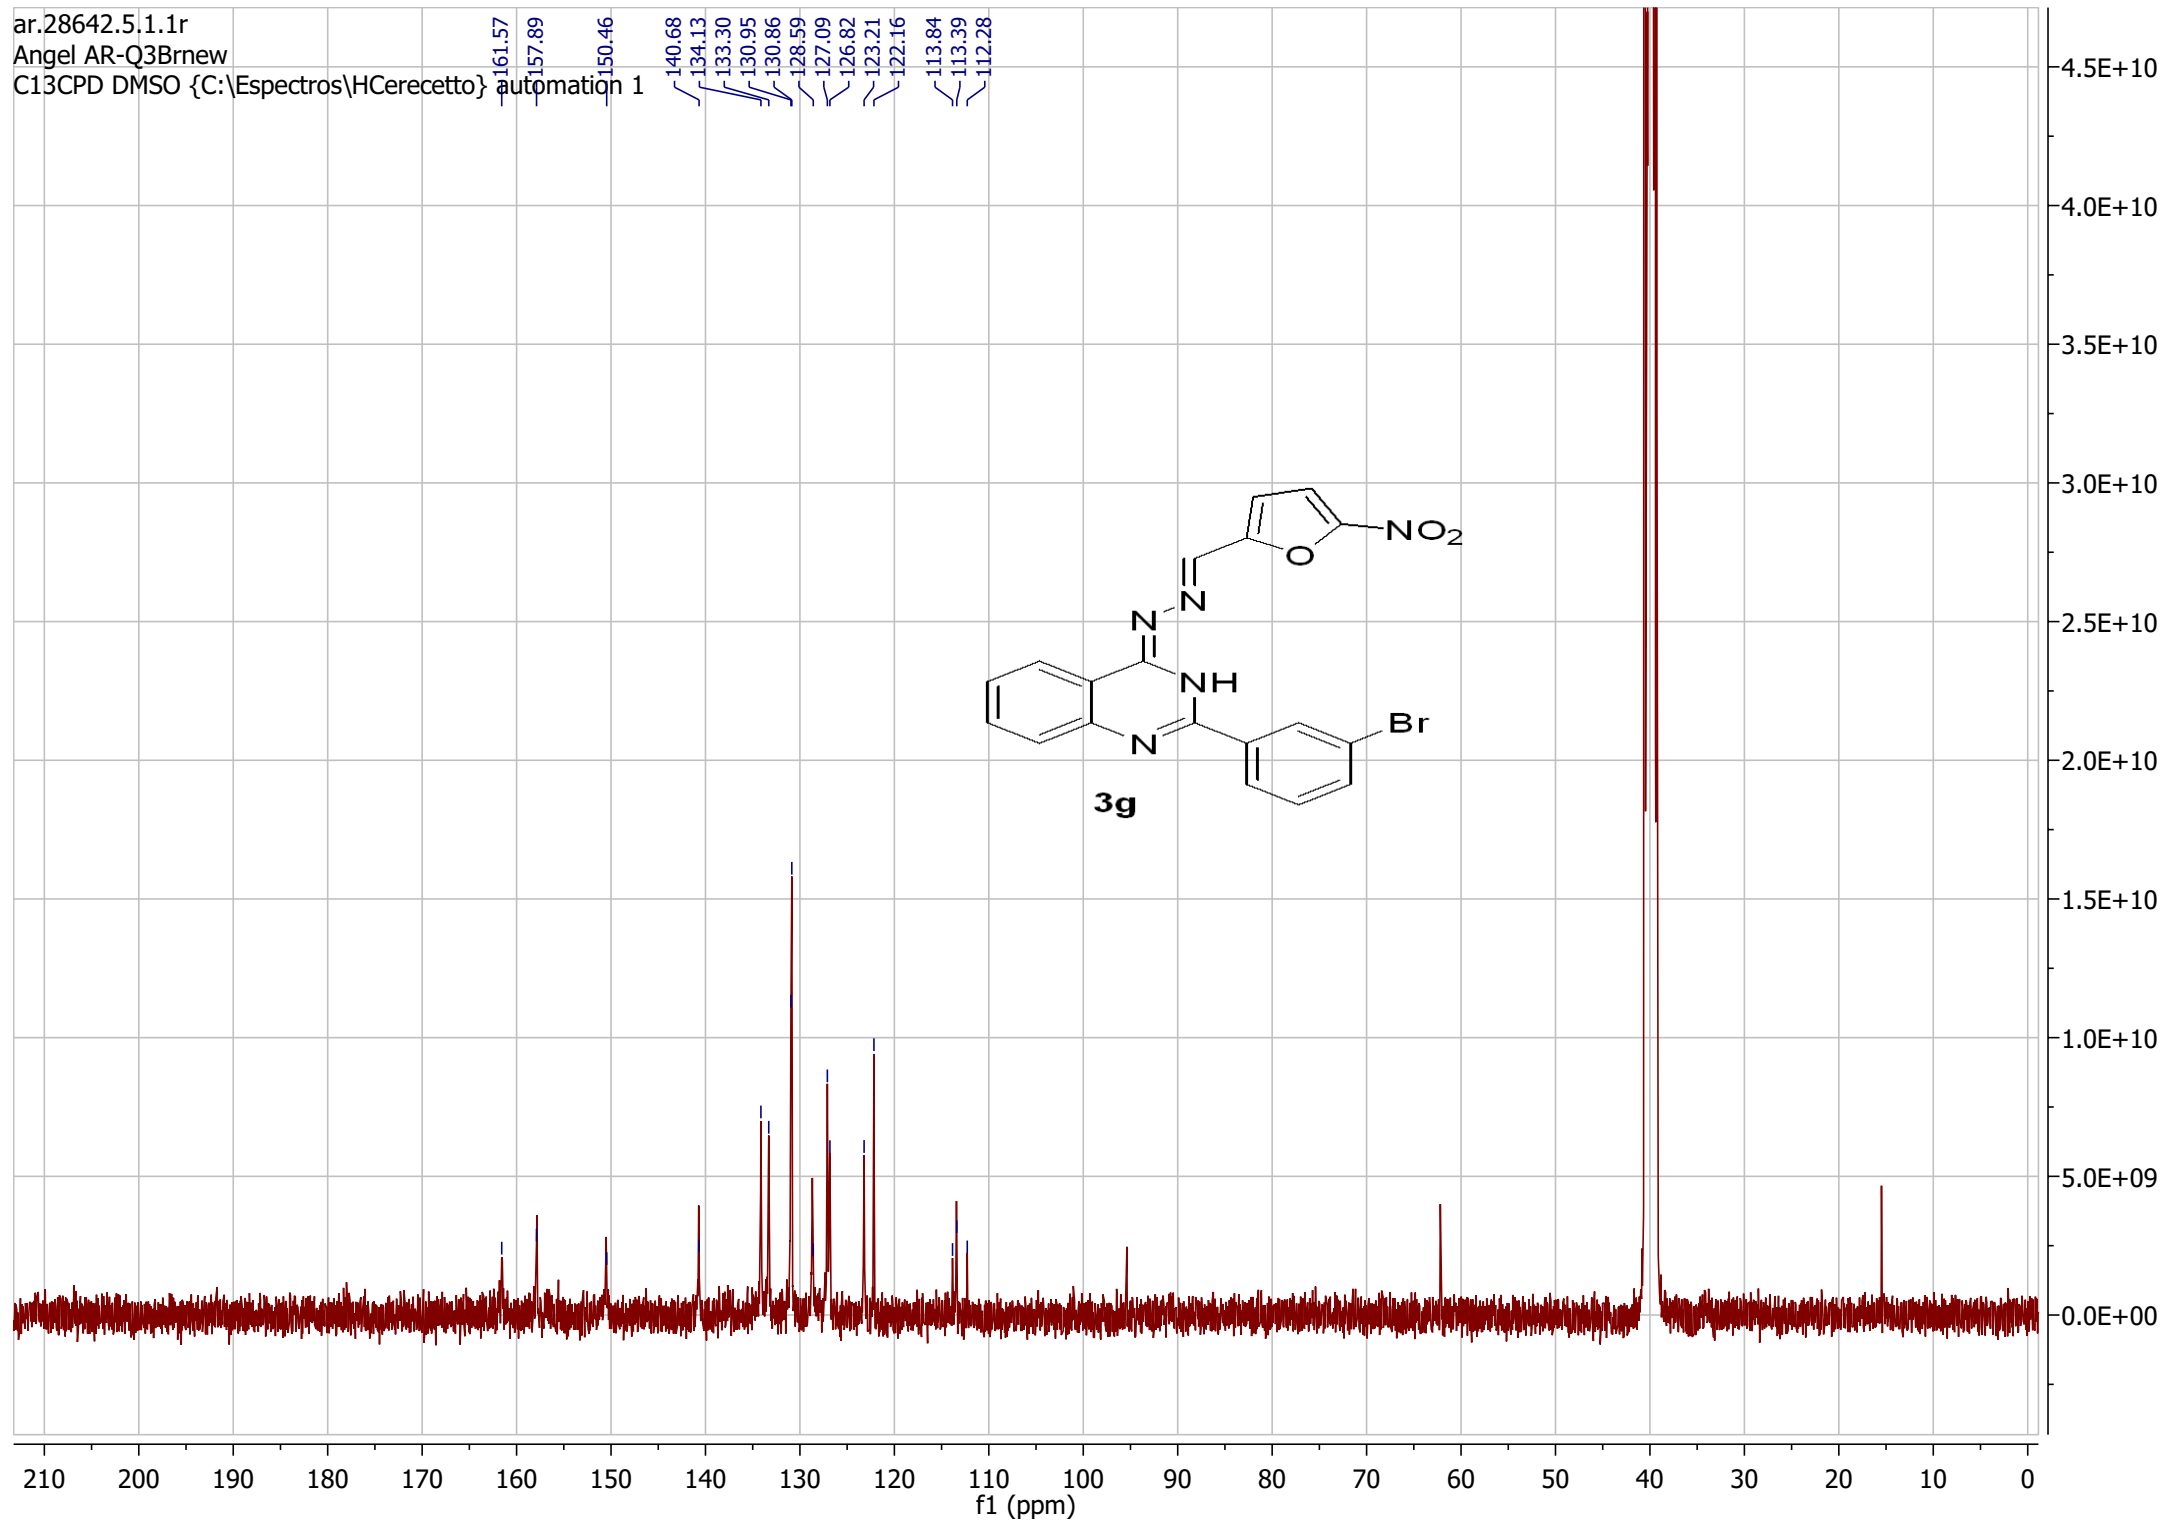

ar.28642.5.1.1r  
Angel AR-Q3Brnew  
C13CPD DMSO {C:\Espectros\HCerecetto} automation 1

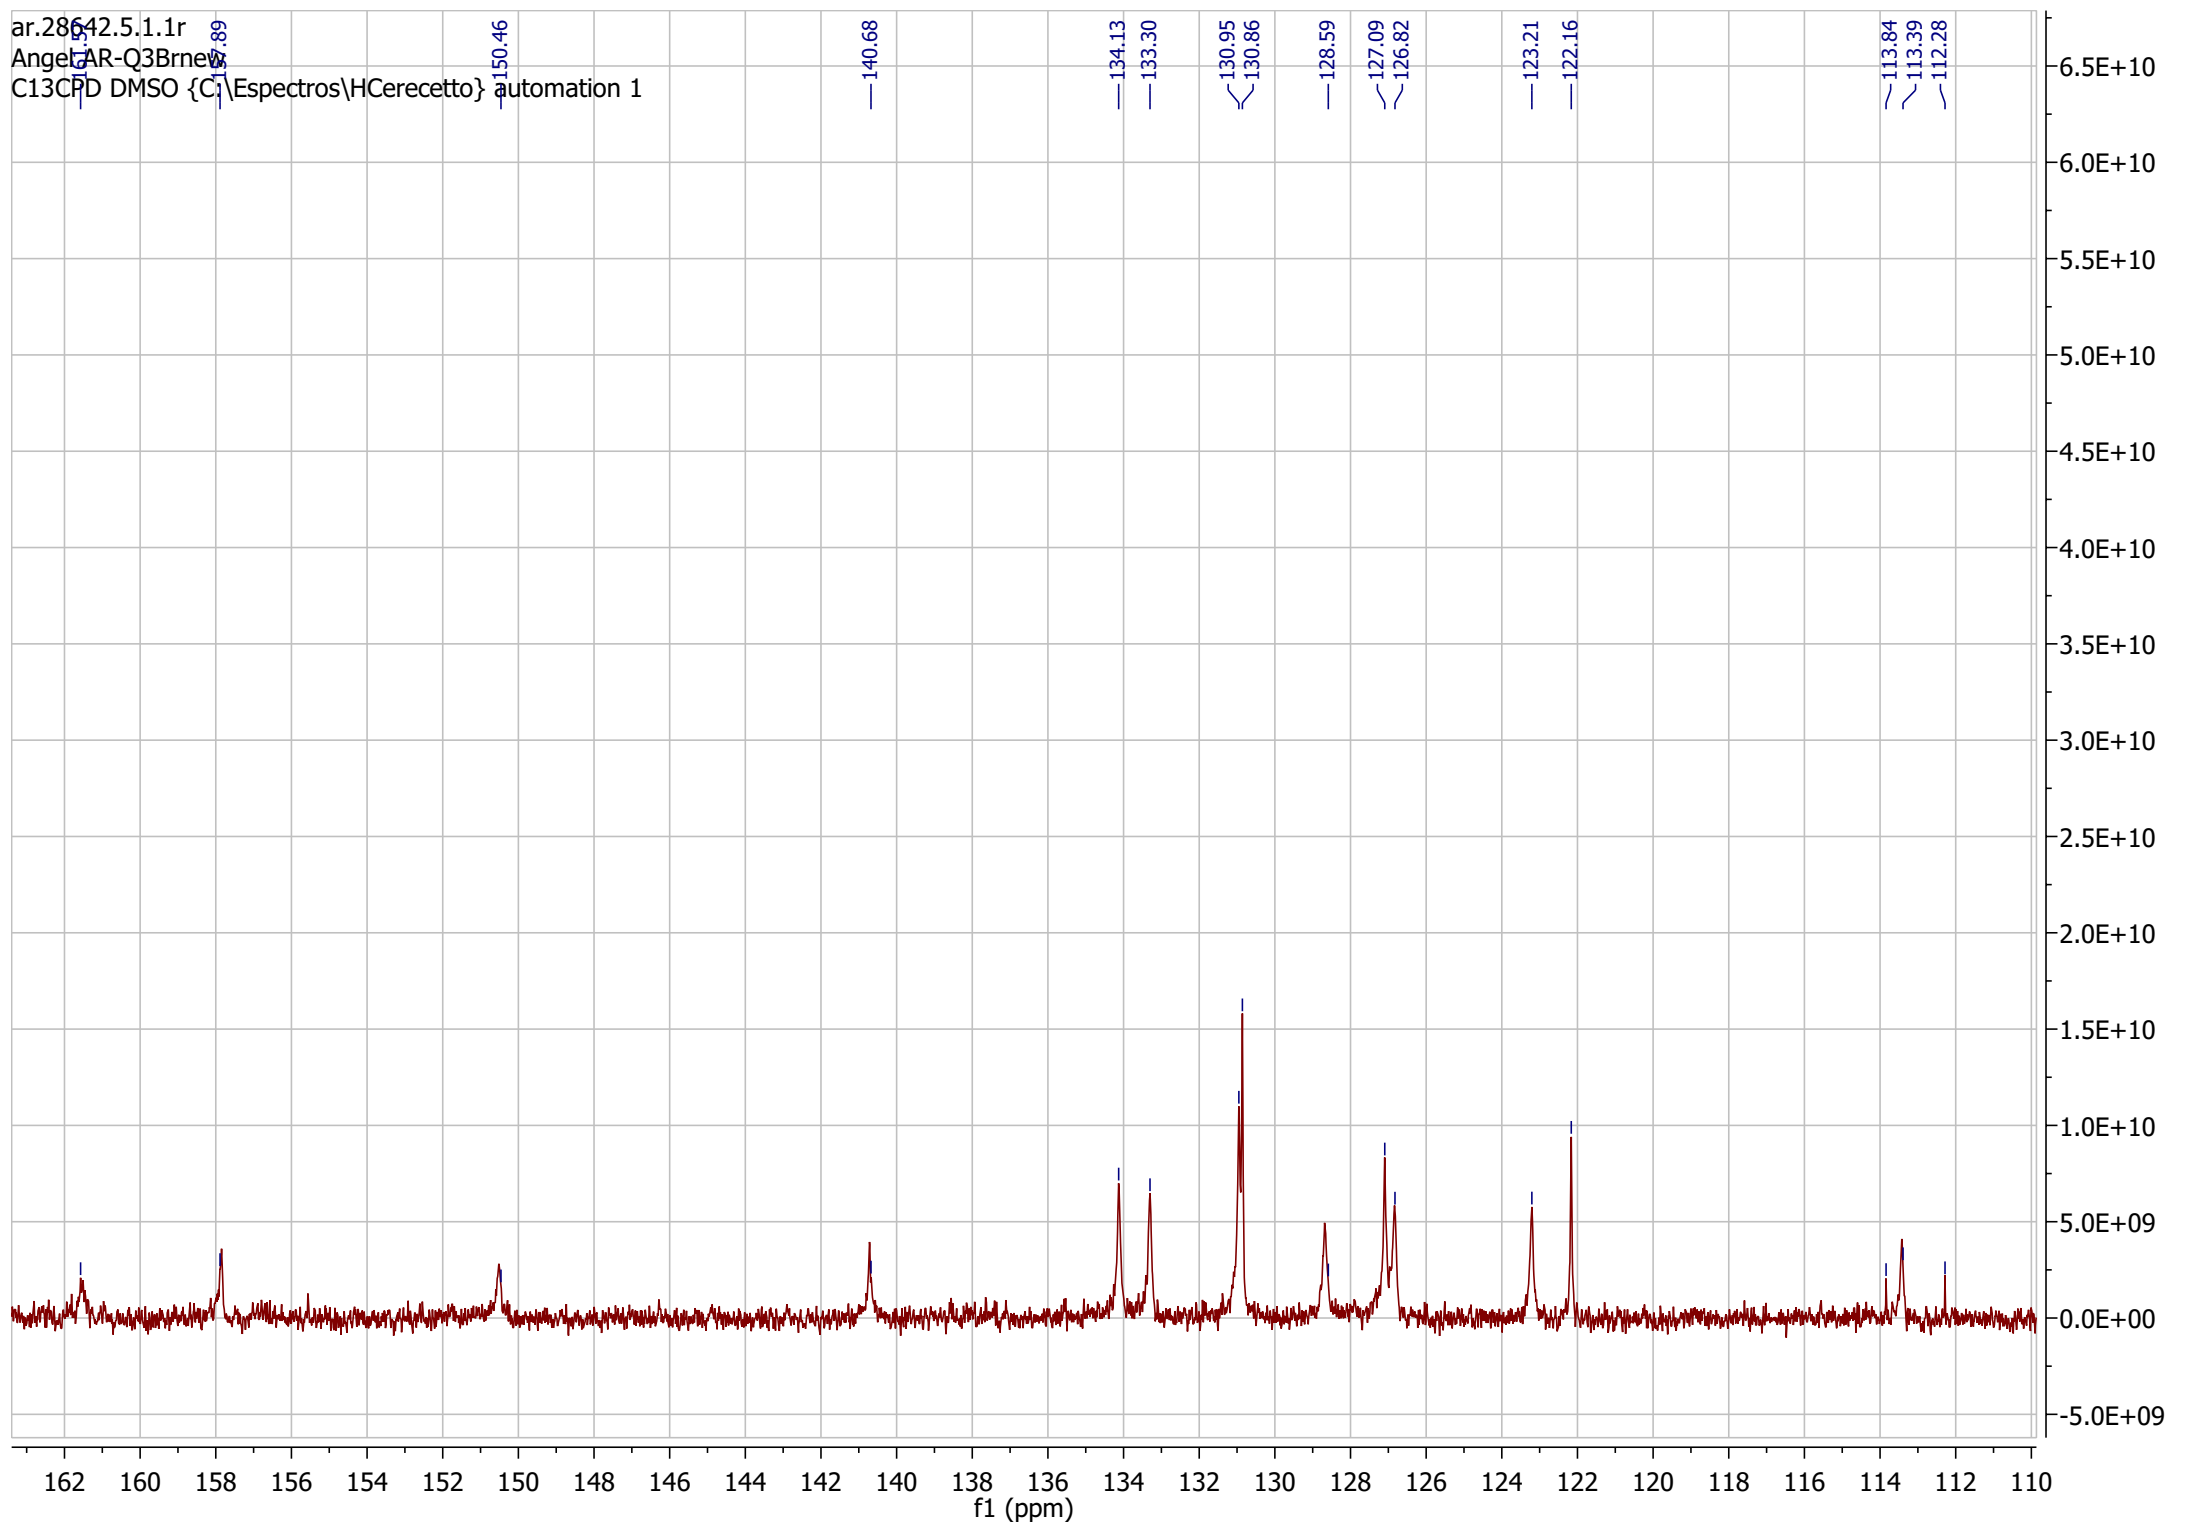

ar.28642.2.1.2rr  
Angel AR-Q3Brnew  
COSY DMSO {C:\Espectros\HCerecetto} automation 1

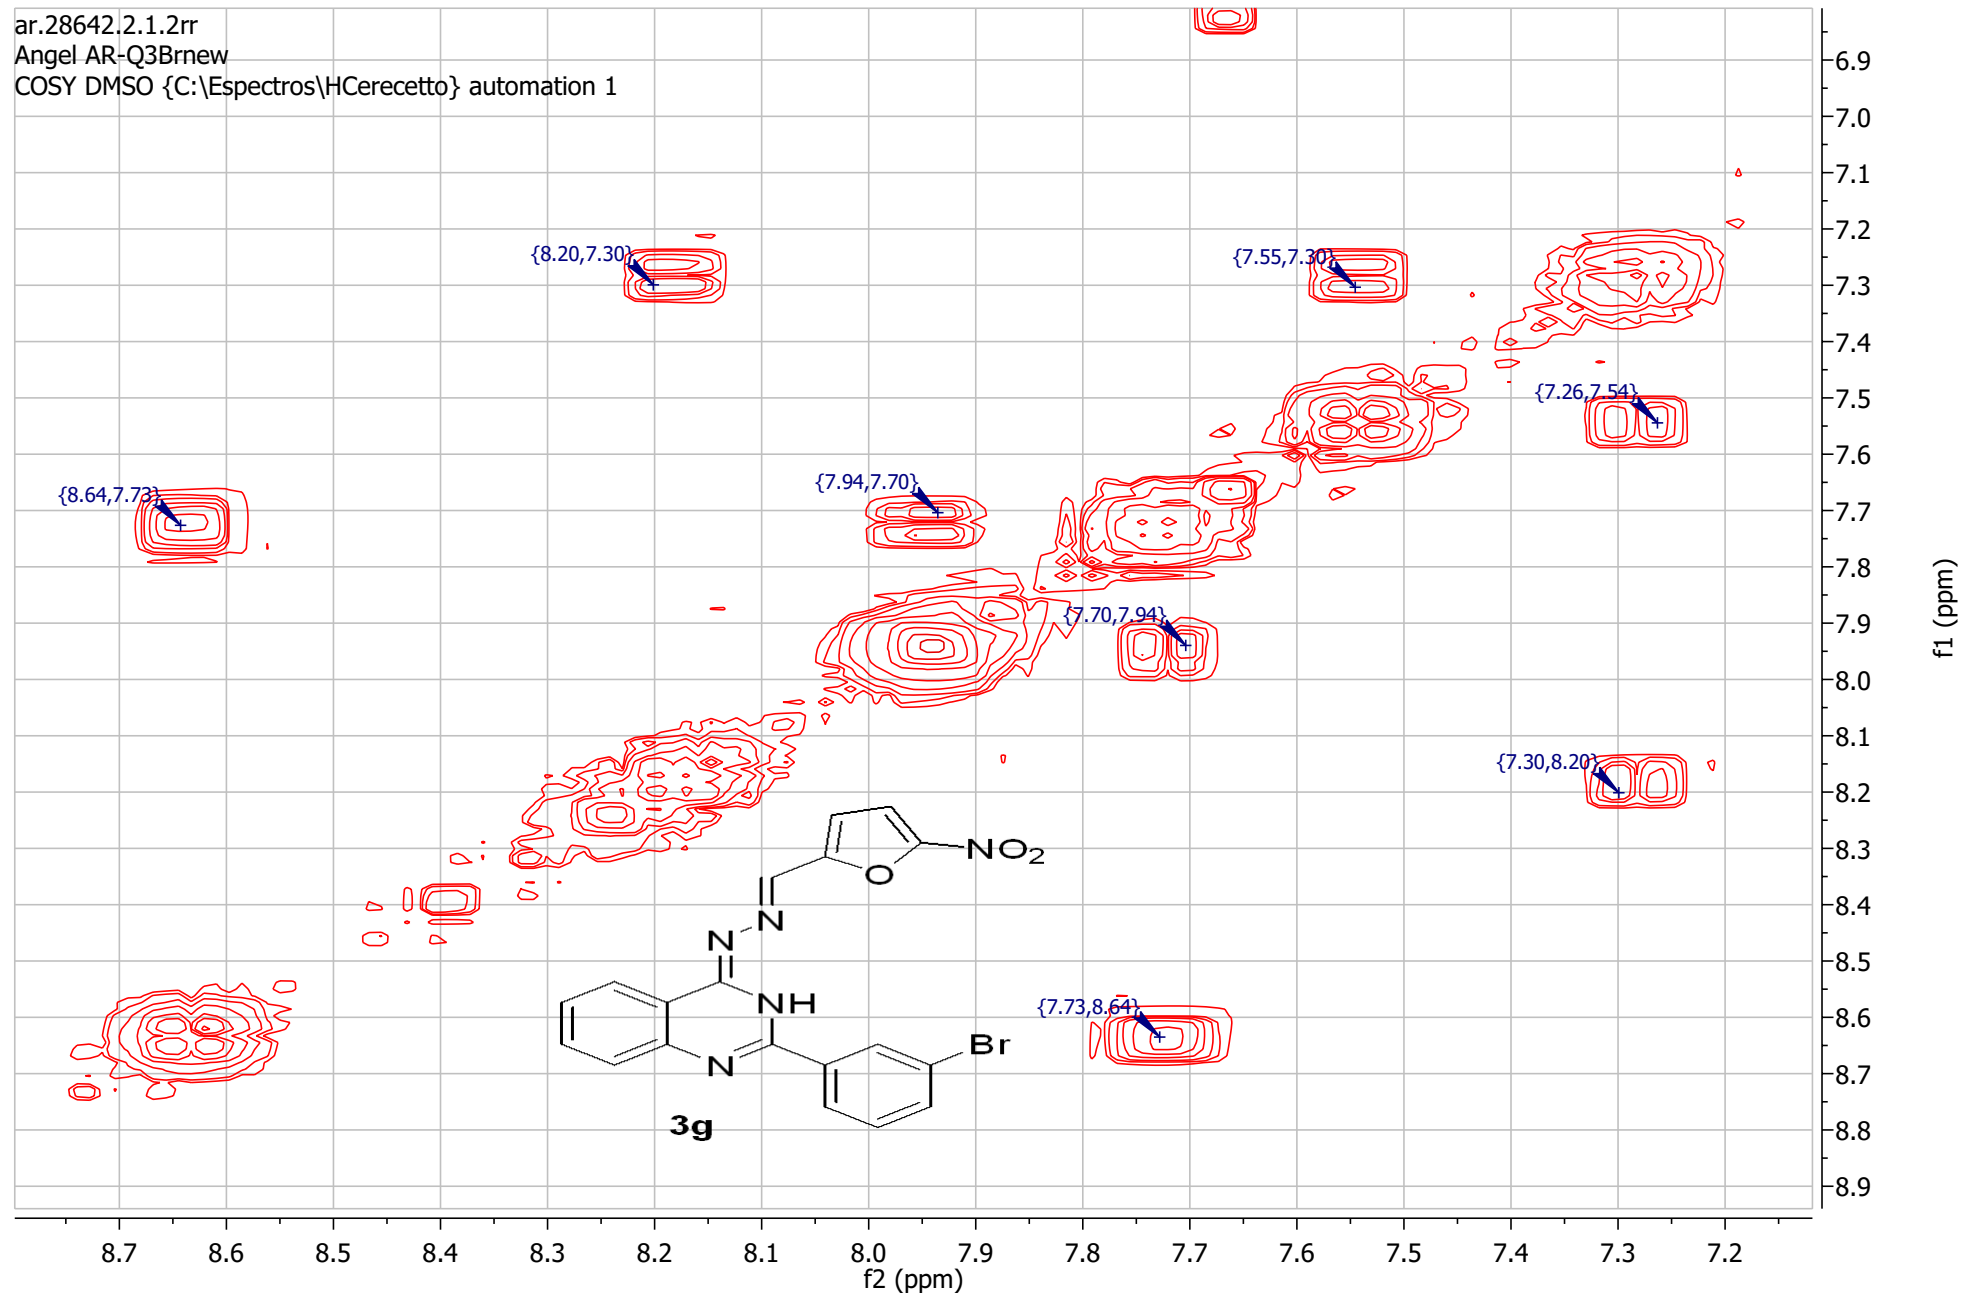

{8.64, 7.73}

{8.20, 7.30}

{7.94, 7.70}

{7.70, 7.94}

{7.55, 7.30}

{7.26, 7.54}

{7.30, 8.20}

{7.73, 8.64}

**3g**

f1 (ppm)

f2 (ppm)

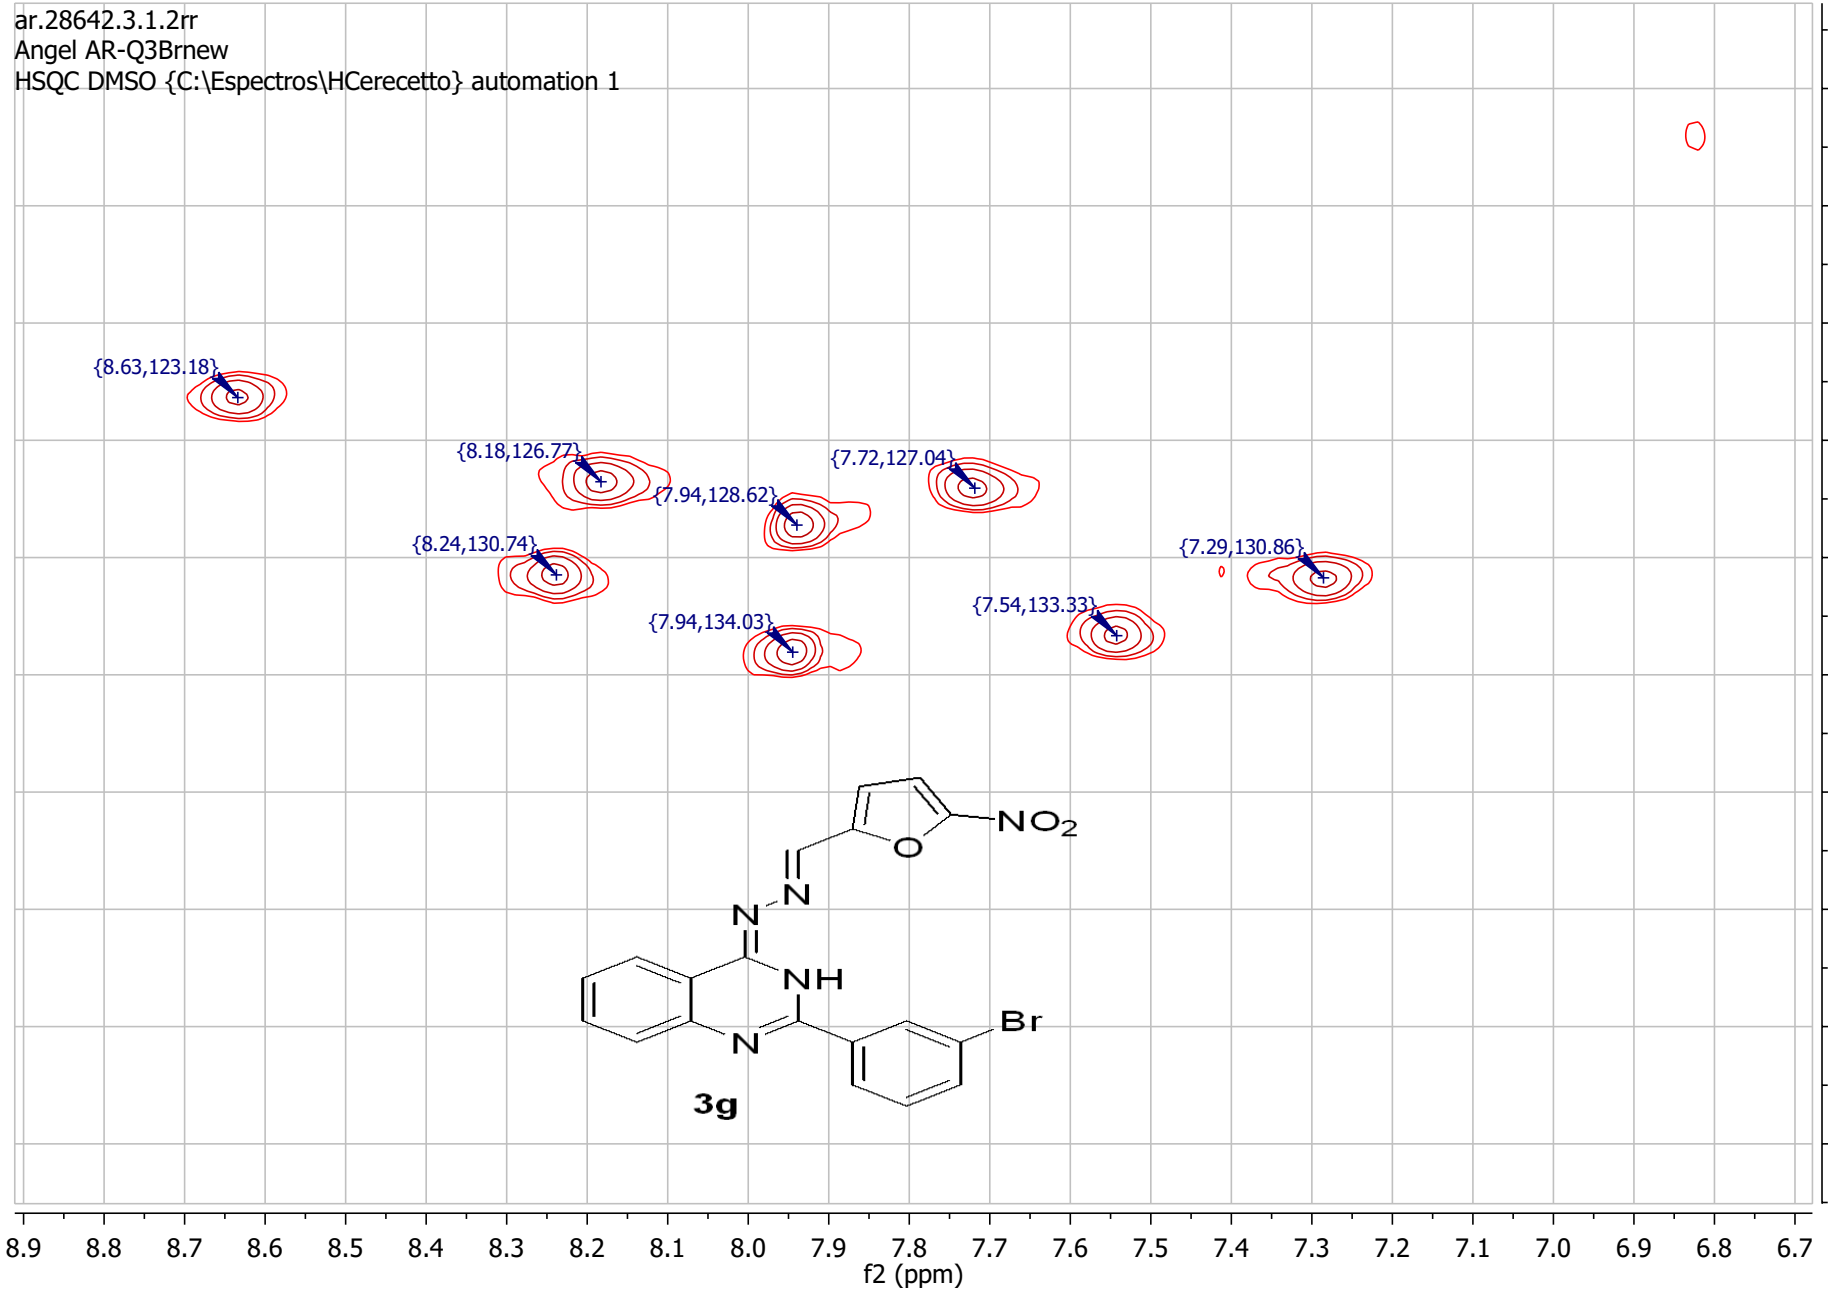

f1 (ppm)

f2 (ppm)



ar.28297  
Angel AR-Q4FFurf  
PROTON8 DMSO {C:\Espectros\Hercetto} automation

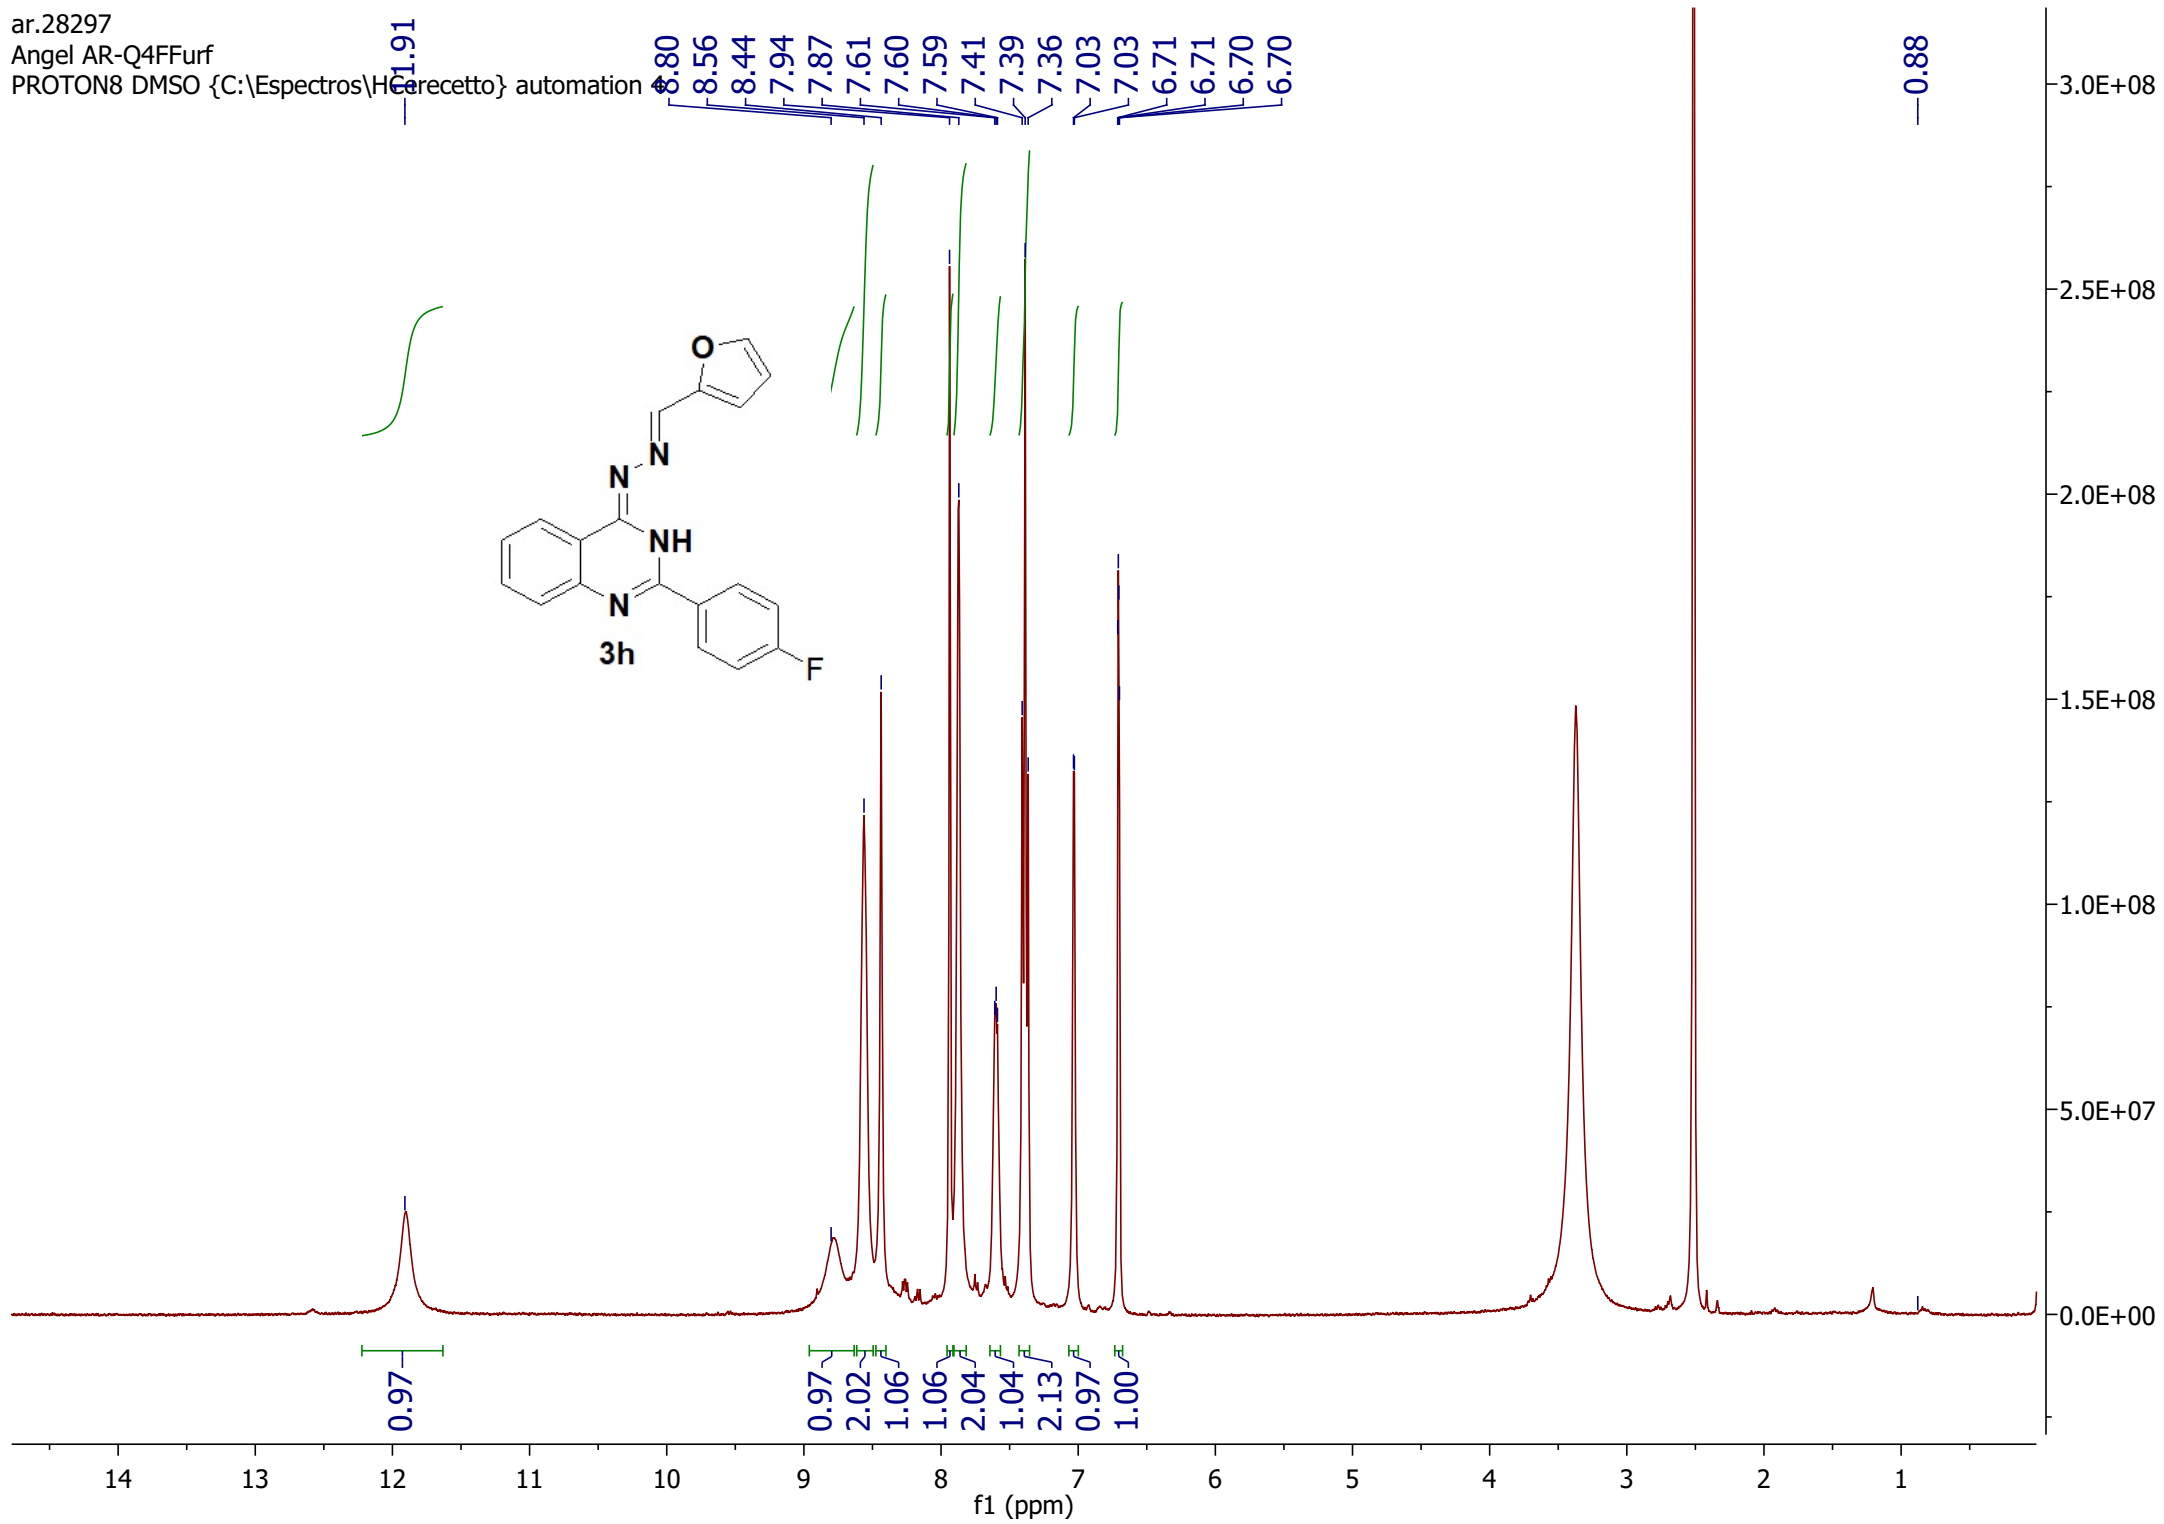

ar.28297  
Angel AR-Q4FFurf  
PROTON8 DMSO {C:\Espectros\HCerecett} automation 4

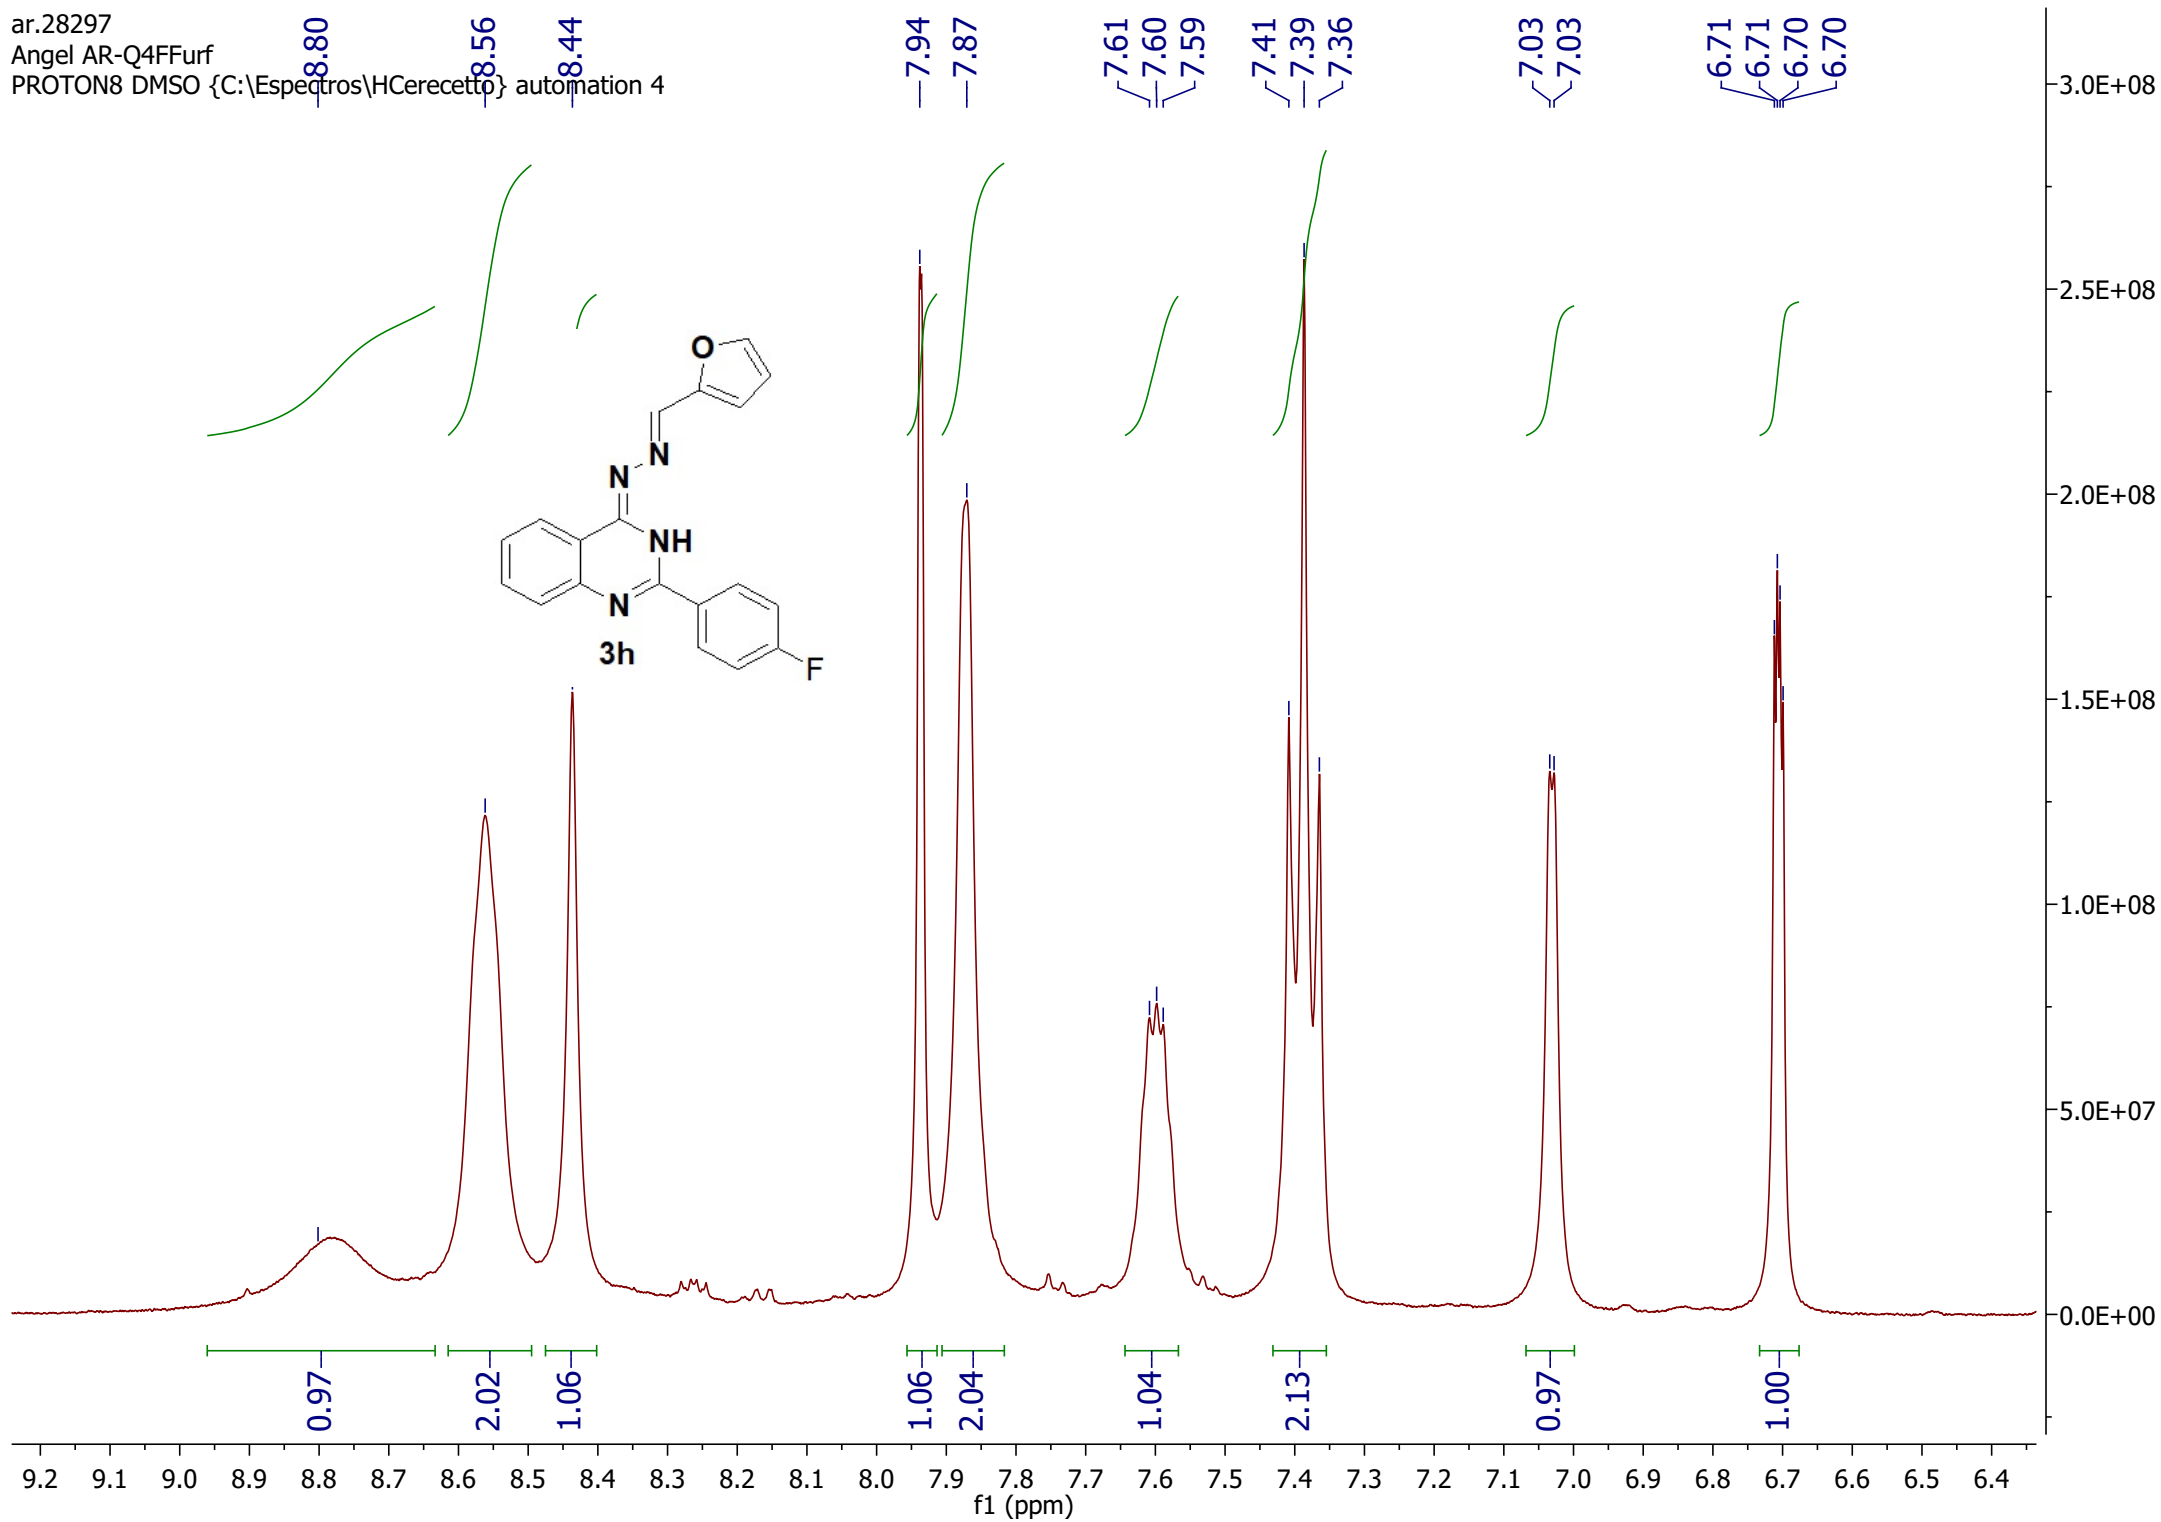

ar.28297  
Angel AR-Q4FFurf  
C13CPD DMSO {C:\Spectroscopy\Reference\atomations\

115.52  
113.06  
118.55  
117.54  
110.03  
115.93  
114.19  
116.71  
134.61  
133.95  
130.85  
130.76  
127.82  
126.43  
115.90  
115.68  
114.10  
113.09  
112.81

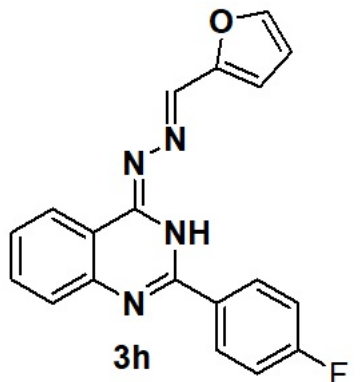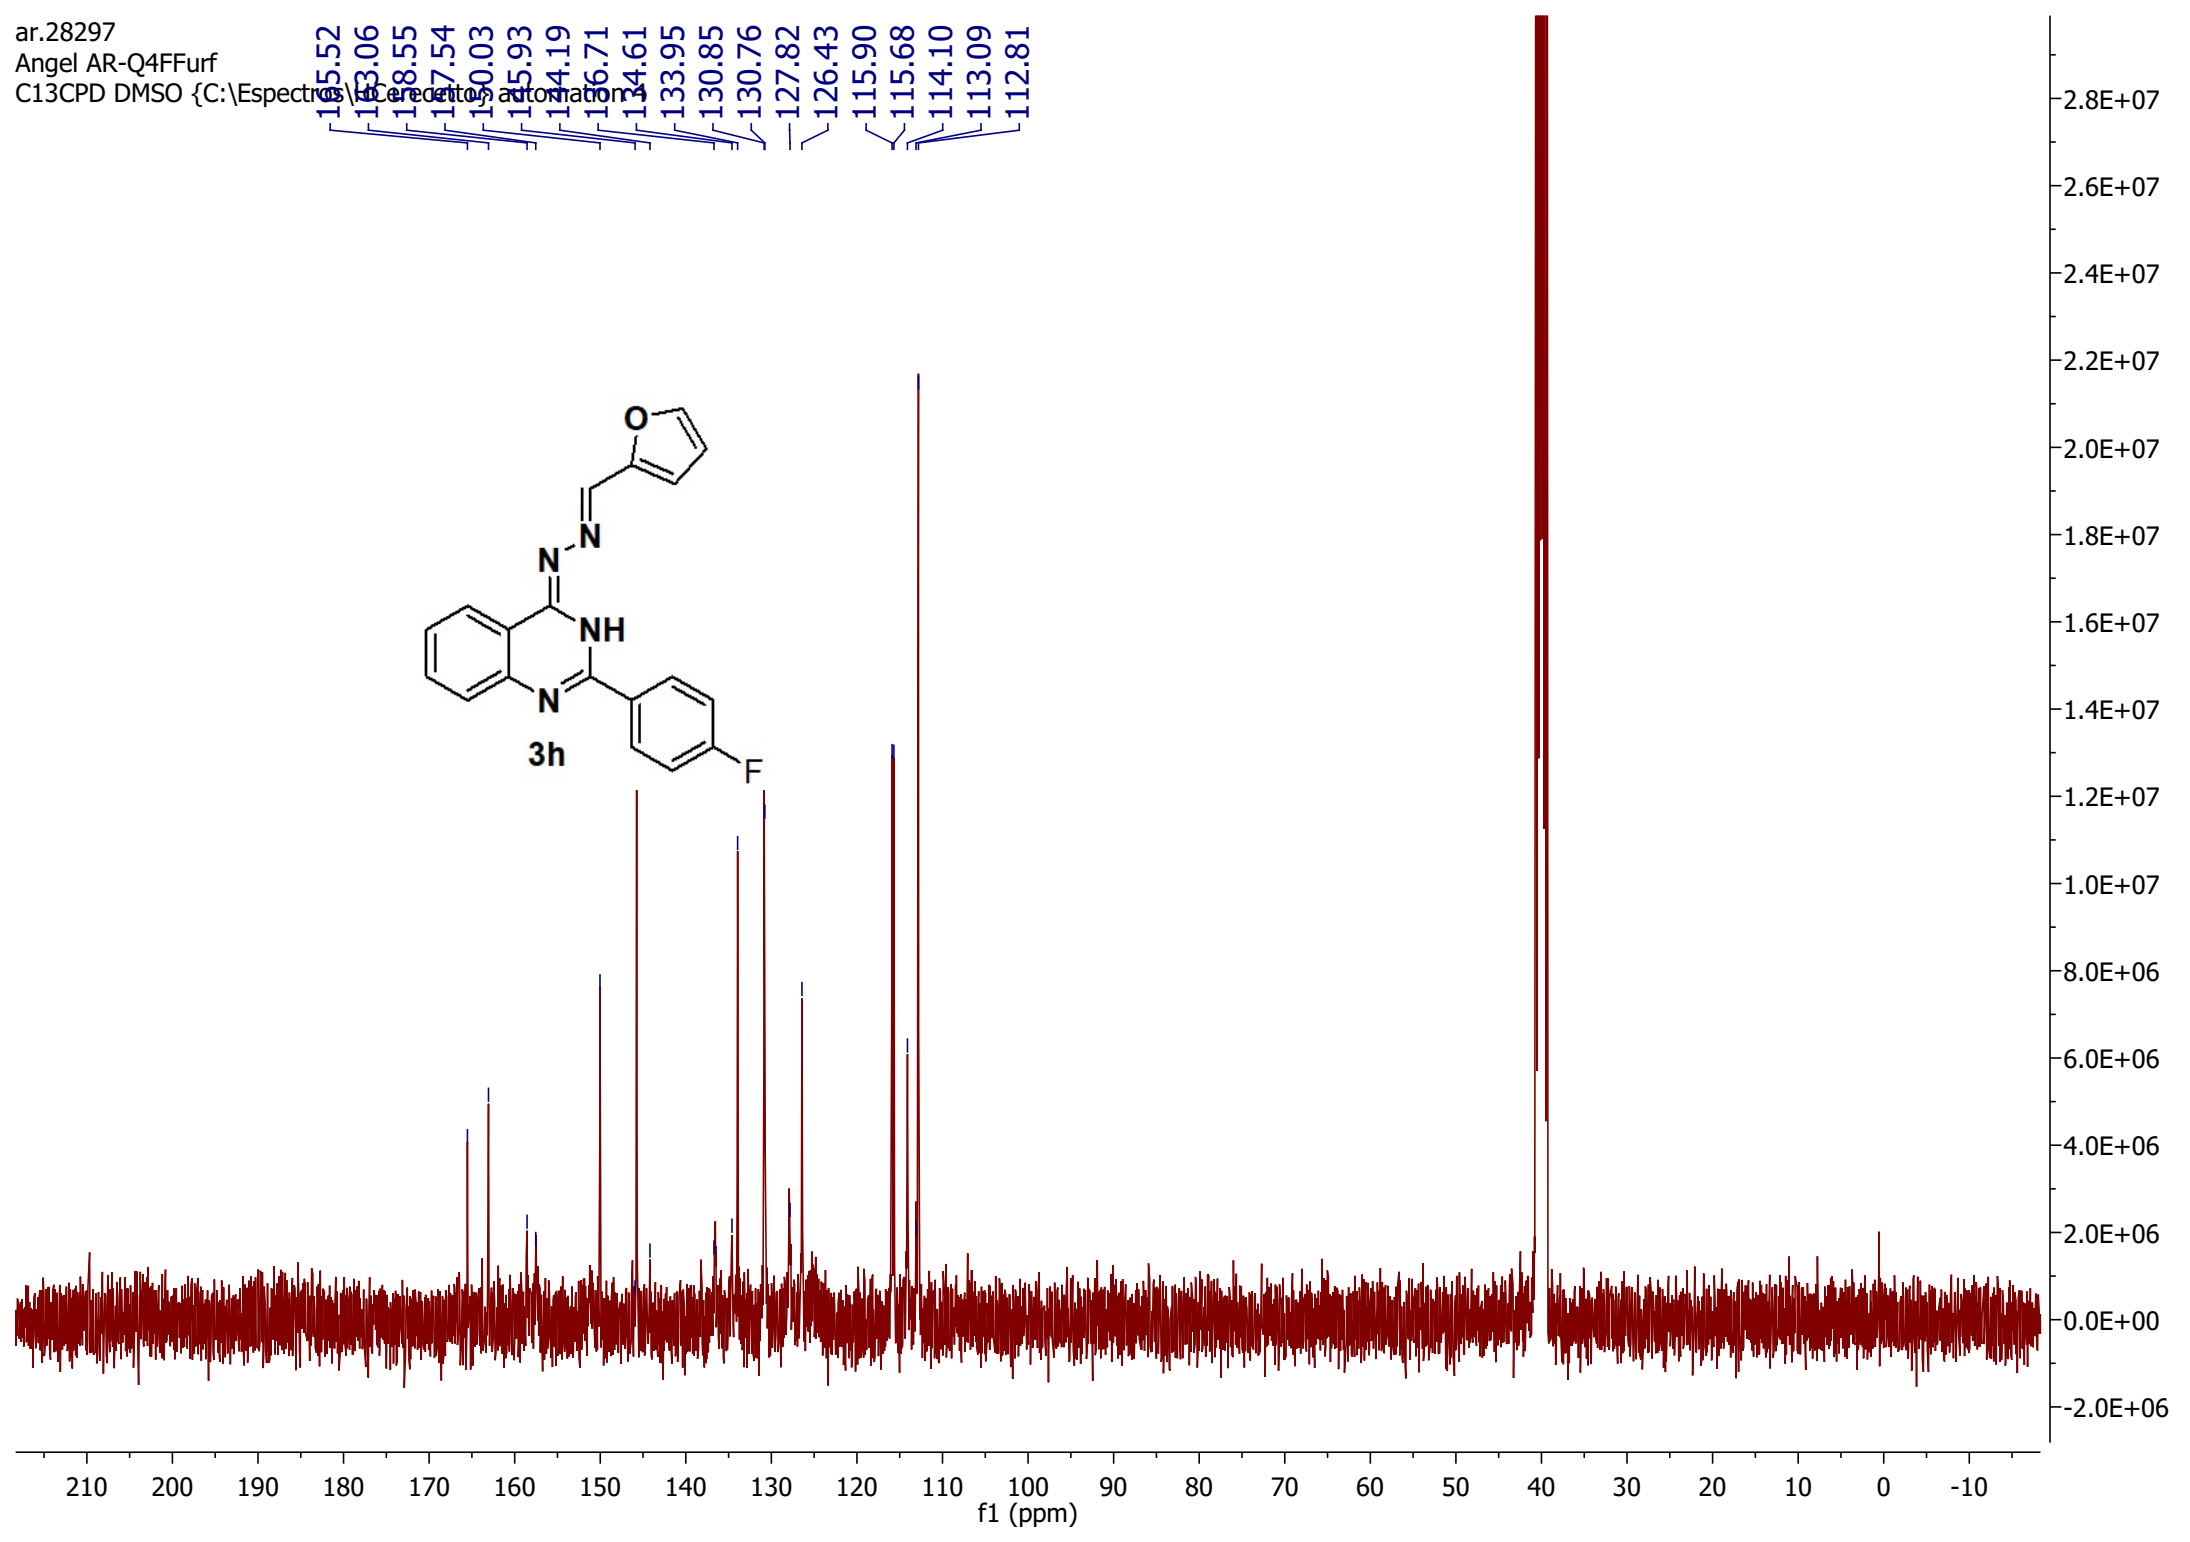

ar.28297  
Angel AR-Q4FFur  
C13CPD DMSO {C Espectros\Heraetto} automation 4

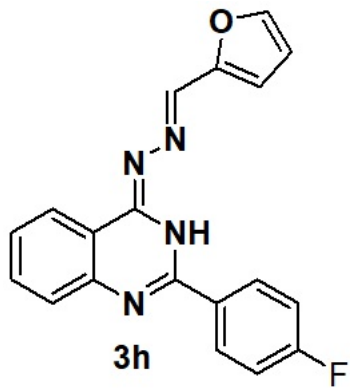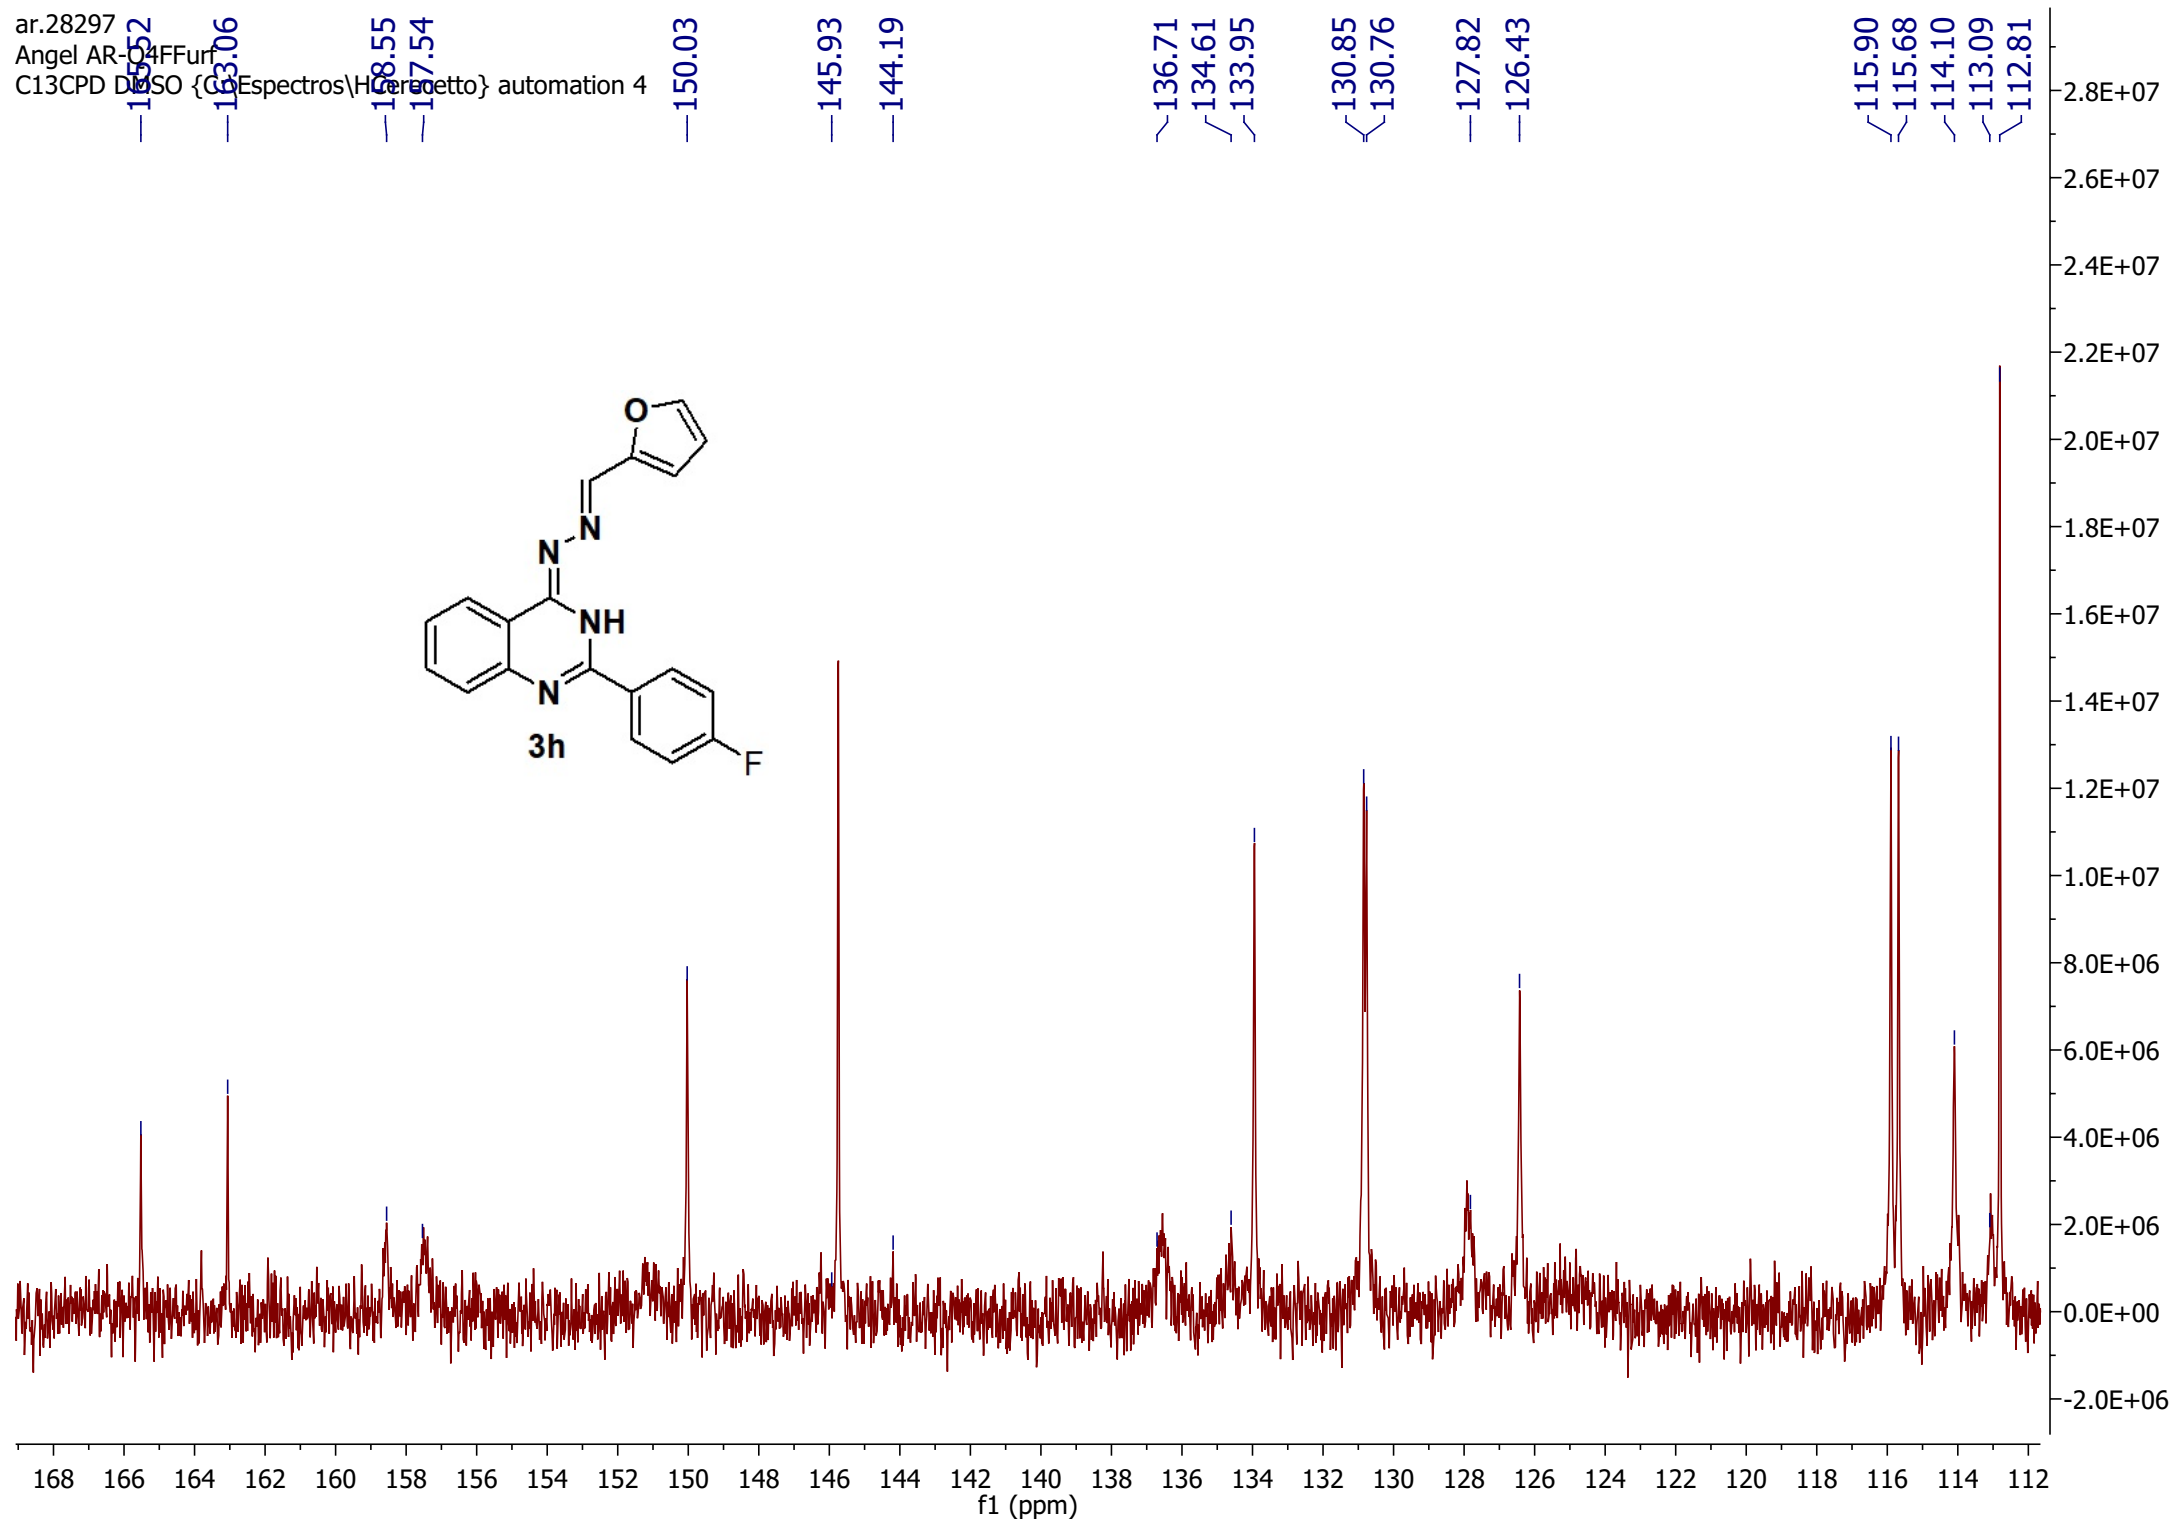

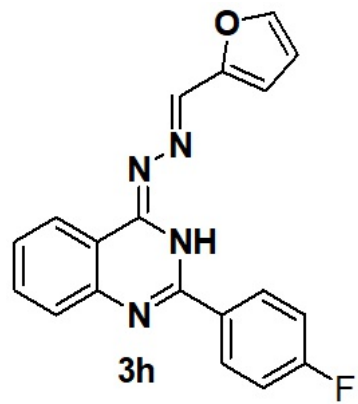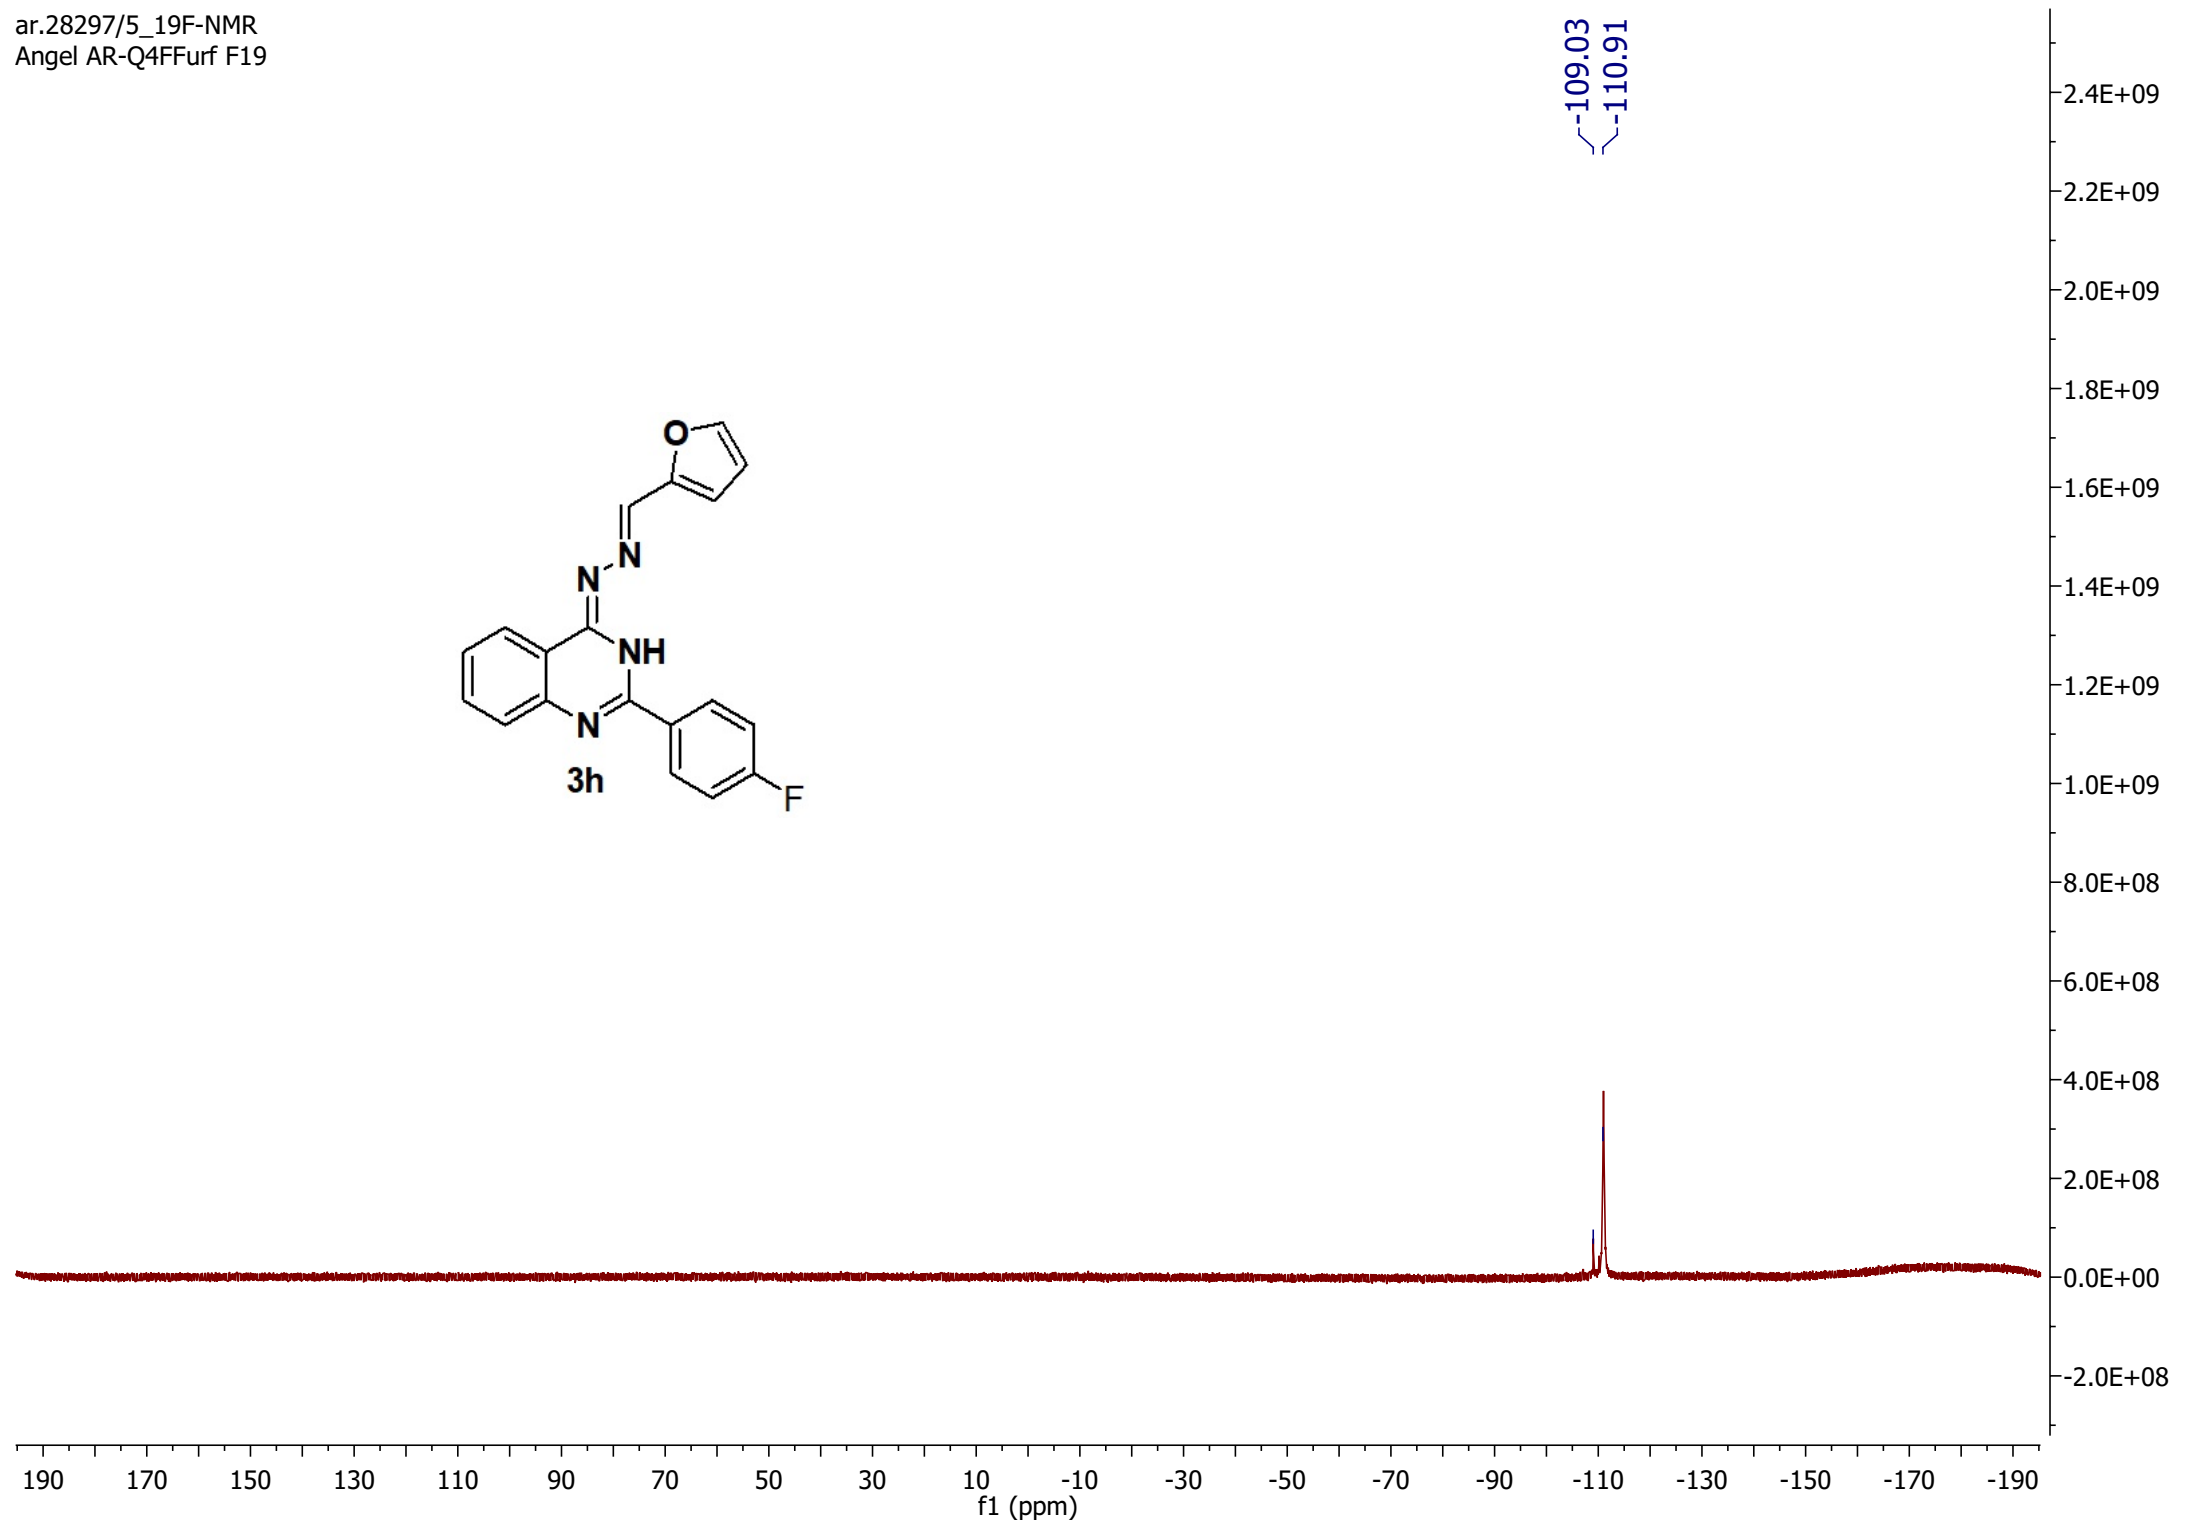

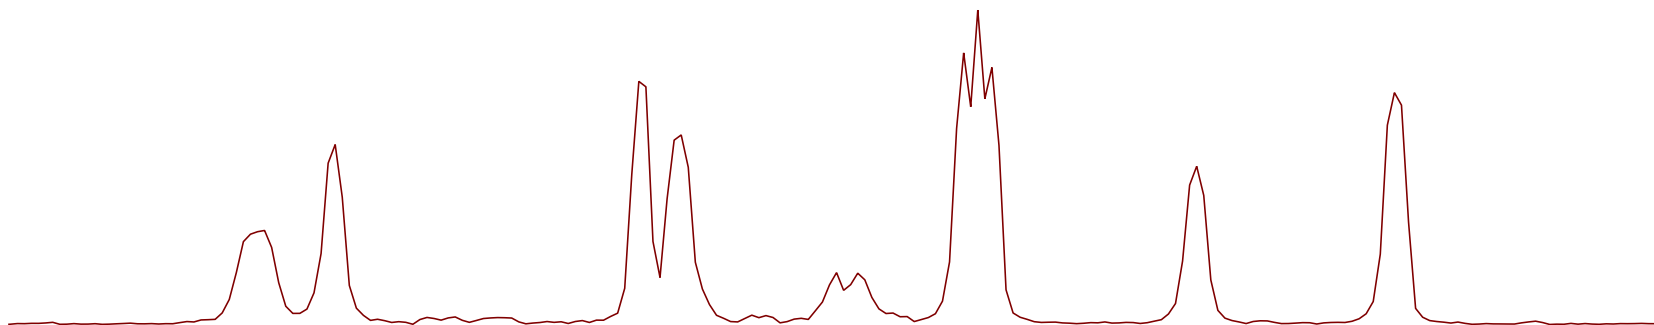

ar.28297  
Angel AR-Q4FFurf  
COSY DMSO {C:\Espectros\HCerecetto} automation 4

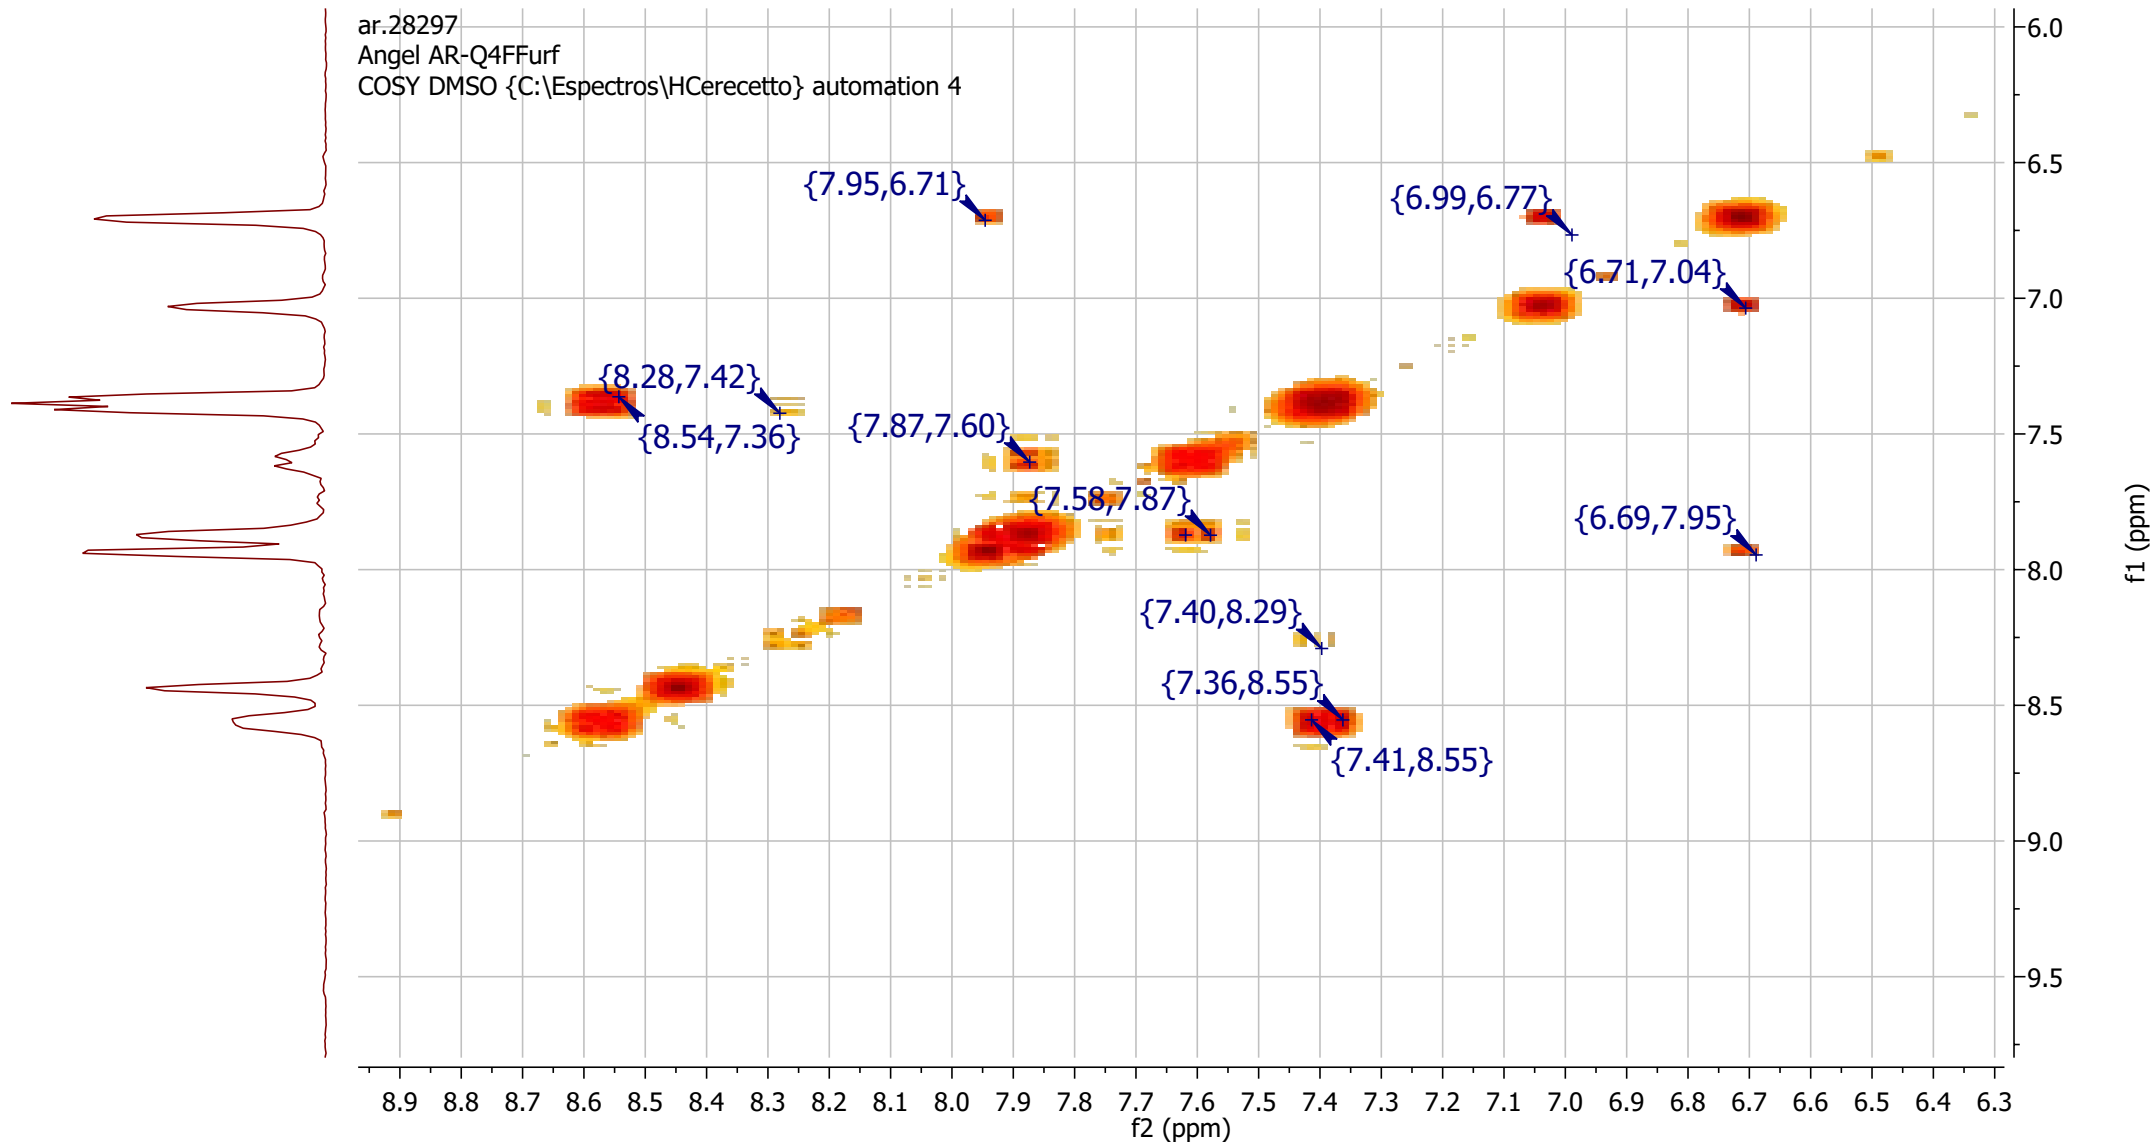

Supplement: d3md00243h1.pdf [file d3md00243h1.pdf]
